# Supplementary material for: Proliferative and Invasive Colorectal Tumors in Pet Dogs Provide Unique Insights into Human Colorectal Cancer
Source: Cancers (Basel). 2018 Sep 14;10(9):330. doi: 10.3390/cancers10090330 (PMC6162437; doi:10.3390/cancers10090330)
Supplement: Supplementary file 1 [file cancers-10-00330-s001.zip › cancers-358916 - Supplementary tables.xlsx]

## Sheet: TableS1 Sample information
Table S1. Canine intestinal samples used in this study, Related to Figures 1-5
Case ID	Histologic subtype & other data	Genomic studies (WGS, RNA-seq, aCGH)2	Date of Birth	Age at Sample collection	Breed	Sex	Sample Date	Sources	Follow up information
125T3	Carcinoma, rectum	RNA-seq, aCGH	1994-01-01		airedale terrier	MC	2004-09-17	CSU
1420T	Adenocarcinoma, colon	RNA-seq, aCGH	2003-01-05		Labrador Retriever	MI	2011-08-19	CSU
394T	Colorectal Adenocarcinoma	RNA-seq, aCGH	1996-05-10		german shepherd	MC	2005-11-18	CSU
48T	Carcinoma, rectum	RNA-seq, aCGH	1996-10-01		shetland sheepdog	FS	2004-02-16	CSU
756T	Adenocarcinoma, Intestine, jejeunum	RNA-seq, aCGH	2000-03-01		mix	MC	2007-04-05	CSU
869T1A	Stromal tumor, Rectum	RNA-seq, aCGH	1997-07-01		mix	FS	2007-09-14	CSU
869T1B	Stromal tumor, Rectum	RNA-seq, aCGH	1997-07-01		mix	FS	2007-09-14	CSU
970T	Adenocarcinoma, Intestine, duodenum	RNA-seq, aCGH	1996-01-01		Golden Retriever	FS	2008-01-30	CSU
975T	Colonic adenocarcinoma, Metastic, lymph node	RNA-seq, aCGH	1999-06-01		airedale terrier	MC	2008-02-08	CSU
MUCA_N	Colorectal, Normal	WGS, RNA-seq			Shih Tzu?		2011-04-03	MU
MUCA_T	Colorectal adenocarcinoma, metastic	WGS, RNA-seq, aCGH			Shih Tzu?		2011-04-03	MU
Nub_Large	Colonic Adenoma	WGS, RNA-seq			Mixed Breed	MC	1/26/2007?	MU
391575T	Colorectal Carcinoma	WGS, RNA-seq		8	Red Bone Coon Hound	C	2008-03-20	OSU	Also had malignant histiocytosis in the spleen removed on the same date. Returned for suture removal, but no treatment at OSU. No further follow up.
391575N	Colon Normal sample	WGS		8	Red Bone Coon Hound	C	2008-03-20	OSU
407212T	Colonrectal adenocarcinoma	WGS, RNA-seq		9	Boston Terrier	M	2010-03-25	OSU	Euthanized 1/21/2014. Likely lung metastasis, though no imaging or further diagnostics were performed.
407212N	Skin	WGS		9	Boston Terrier	M	2010-03-25	OSU
421232T	benign, Adenoma	WGS, RNA-seq		6	Shih Tzu	S	2012-02-07	OSU	Presented with pancytopenia 4/23/2015. Bone marrow biopsy revealed no neoplasia, inflammation or infectious agens. It was resolved when she returned 5/15/15 for treatment of KCS and corneal ulcer. No further follow-up since 5/19/15.
421232N	Skin	WGS		6	Shih Tzu	S	2012-02-07	OSU
441829T	carcinoma	RNA-seq		13	Mixed Breed	S	2014-10-31	OSU	This sample was collected at euthanasia. Tumor had already metastasiized to sublumbar lymph nodes.
442226T	Adenocarcinoma	RNA-seq		6	Mixed Breed	C	2014-10-23	OSU	Received 5 doses of PALLADIA from 10/1-10/12/2014, then stopped because of severe toxicicty. This sample was collected at euthanasia.
209439_Black	Carcinoma in situ, polypoid, rectum	WGS, RNA-seq, aCGH		7	Collie	FS	2006-11-02	UGA	7 year old spayed female Collie with bloody stool for 3 months, straining to defect, mass palpated in rectum. NOV 2, 2006 had 6 cm of rectum with raised papillary lesions removed.
L1221E N	Normal colon, inflammatory?	WGS, RNA-seq					2014-11-15	UGA
L1221E T	Colorectal Carcinoma	WGS, RNA-seq					2014-11-15	UGA
252321T	Adenocarcinoma, rectum	RNA-seq	2005-04-06		airedale terrier	MI	2015-07-22	UGA
UGA_T	Colonic Adenoma	WGS, RNA-seq					2006-01-13	UGA
257191	Adenocarcinoma, rectum	RNA-seq		9	Mixed Breed	MC	2015-12-02	UGA	A 9-year-old male neutered mixed breed, was presented to the UGA Internal Medicine Service on 12/01/15 for a 3-year history of bloody diarrhea that has been worsening for the past several weeks. Euthanasia DEC 19 2015: On Saturday, December 19th, re-presented to the UGA Emergency Service for humane euthanasia. He had become painful at home, the mass was prolapsing, and his quality of life had bee…
372755	Adenocarcinoma, rectum	WGS, RNA-seq		6	Mastif		2006-08-03	UGA or UCD	blood stool for 1-2 years
372924	Colonic Adenoma	WGS, RNA-seq						UGA or UCD
Normal colon tissues from heathy dog
Normal_colon	normal - circled mucosa	RNA-seq					2005-12-10	UGA
2WGS: whole genome sequencing; RNA-seq; aCGH: 385K array CGH. T: tumor; N: normal
3FS: female spayed; FI: female intact.

## Sheet: TableS1A Seq & Mapping summary
Table S1A-1. RNAseq - sequencing and mapping results, Related to Figure 1-5
Cancer Case	total pairs	UPM%1	discordant%2	RPM%3	UM%4
391575T E1	21914244	0.7142	0.0222	0.0656	0.1978
407212T E1	15309931	0.723	0.0242	0.0614	0.1912
421232T E1	12406772	0.7253	0.0255	0.0645	0.1845
L1221E N E1	12656947	0.7753	0.0164	0.0353	0.1728
L1221E T E1	17546675	0.7154	0.0284	0.062	0.1941
125T3_D_E1	18415279	0.6373	0.0664	0.088	0.2082
1420T1_E1	18452141	0.7152	0.0563	0.0891	0.1394
209439_Black_E1	16522932	0.694	0.0546	0.0871	0.1642
252321T_E1	23702458	0.6899	0.0676	0.0874	0.1551
372755_E1	22182086	0.6598	0.09	0.1124	0.1378
372924_E1	19875959	0.6744	0.0628	0.0844	0.1784
394_T4_E1	19792384	0.7074	0.0603	0.0832	0.1491
441829T_W_E1	20343853	0.6557	0.0541	0.0752	0.215
442226T_E1	26943437	0.6984	0.0671	0.0919	0.1427
48T3A_E1	16878276	0.696	0.077	0.1065	0.1205
756T1C_E1	18820628	0.6854	0.0625	0.085	0.1671
869T1A_E1	21672874	0.7403	0.058	0.0795	0.1221
869T1B_E1	21546165	0.6089	0.111	0.1438	0.1363
970T5_E1	23950941	0.6878	0.0476	0.0726	0.1921
975T2-1_E1	21805849	0.6604	0.0848	0.129	0.1258
MUCA_N_E1	16945985	0.6958	0.064	0.0909	0.1493
MUCA_T_E1	17042290	0.6	0.0698	0.1108	0.2194
Normal_colon_E1	19851256	0.6974	0.056	0.0831	0.1635
Nub_Large_E1	19158333	0.6579	0.0765	0.1019	0.1637
UGA_To_E1	16438063	0.6102	0.1029	0.1291	0.1577
257191	22606577	0.6445	0.0535	0.0944	0.2075
1 Percentage of uniquely mapped pairs
2 Percentage of discordantly mapped pairs
3 Percentage of repetitively mapped pairs
4 Percentage of unmapped pairs
Table S1A-2. WGS - sequencing and mapping results, Related to Figure 1-6
Cancer Case	Read length, bp	Total fragments with both ends sequenced	Ave. frag size ± SD1, bp	Sequencing coverage	Fragment coverage	UPM%2	RPM%3	1EM%4	OTHER%5	UM%6
391575N E1-2	125	65793322	336 ± 87	6.45118	8.67038	0.945606	0.0135815	0.0086761	0.00832183	0.0238145
391575T E1	125	58515321	327 ± 87	5.74484	7.51425	0.946807	0.0132994	0.008667	0.00819083	0.0230357
407212N E1	125	43204117	322 ± 87	4.23341	5.45263	0.944971	0.0143427	0.00878583	0.00805301	0.0238479
407212T E1-4	125	54857553	356 ± 103	5.37225	7.65008	0.944437	0.0138486	0.00927182	0.00816603	0.024277
421232N E1	125	54224408	343 ± 95	5.34387	7.33179	0.950416	0.0145868	0.0077014	0.00612724	0.0211681
421232T E1	125	59792895	361 ± 105	5.89086	8.50641	0.950129	0.014412	0.00787456	0.00740839	0.0201764
L1221EN	125	98196153	416 ± 113	9.76571	16.2501	0.959096	0.0132614	0.0105343	0.00874633	0.0216225
L1221ET	125	91171541	396 ± 100	8.93921	14.1597	0.945568	0.013394	0.010431	0.00848422	0.0221221
MUCA N E1	125	56900957	485 ± 61	5.53184	10.7318	0.937568	0.0123971	0.0148045	0.00873378	0.026496
MUCA T E1	125	54657602	460 ± 63	5.23591	9.63407	0.923835	0.012466	0.0255534	0.00928514	0.028858
209439 Black E1	125	49303810	469 ± 59	4.79004	8.98611	0.936939	0.0124959	0.0189544	0.00819619	0.0234135
Nub Large E1	125	48608681	518 ± 82	4.71837	9.77645	0.936119	0.0113563	0.0158045	0.0103379	0.0263823
UGA T E1	125	68623033	502 ± 69	6.66508	13.3835	0.936674	0.012018	0.0153876	0.00893505	0.0269842
372924 E1	125	38948038	523 ± 74	3.78178	7.91149	0.936405	0.0122502	0.0159563	0.00997949	0.0254085
372755 E1	125	38970657	464 ± 60	3.78464	7.02429	0.936569	0.0130055	0.0156954	0.00895819	0.025771
1 Average fragment size and standard deviation of uniquely and correctly mapped pairs
2 Percentage of uniquely and correctly mapped pairs
3 Percentage of repetitively mapped pairs
4 Percentage of one end mapped pairs
5 Percentage of abnormally mapped pairs
6 Percentage of unmapped pairs

## Sheet: TableS1B FPKM ssGSEA&heatmaps
Table S1B. log2(FPKM) values of genes from cufflinks results (10,618 in total; FPKM>1 for at least one sample and FPKM>0 in all samples), Related to Figure 2 and Figure 3
gene_short_name	125T	1420T	209439Black	252321T	372755	372924	391575T	394T	421232T	407212T	441829T	442226T	48T	756T	869T1A	869T1B	970T	975T	L1221EN	L1221ET	MUCAN	MUCAT	Normal colon	Nub Large	UGAT	257191T
CA1	6.18686	1.17992	6.96731	-3.99906	-1.54655	5.15789	5.93299	-0.453816	8.77506	0.753296	1.00912	6.00013	6.5099	-1.64582	2.98008	-3.71686	12.7862	7.08536	13.1325	6.60417	12.3459	10.2328	13.5939	3.17685	2.95279	5.52255
DES	4.3101	1.27112	5.52337	0.559188	1.88629	-0.345403	4.47319	1.45967	12.917	9.55548	9.81262	-0.456484	1.33167	11.6528	2.20388	2.77146	11.0042	2.9724	2.47129	0.788435	8.22274	5.28554	6.6297	2.94666	-2.18575	0.792222
SFRP2	1.54339	-2.62545	3.50301	1.52123	-0.905242	-1.43492	10.6101	-0.296671	5.58412	6.21325	9.42087	6.36627	-0.544071	6.21846	6.79625	2.82504	4.08309	7.40464	-1.92441	-1.02289	4.84367	8.49074	0.443469	4.30668	-1.52945	-4.83801
ACTG2	3.52212	0.955209	4.8922	0.881876	1.68741	0.493924	4.53651	-0.0712393	12.121	8.95008	8.64581	4.63007	0.969933	11.3323	0.46135	1.51849	11.2308	1.93185	3.19435	1.82225	8.24866	5.25363	6.95378	2.93752	-1.66657	1.22727
MYH11	2.54103	-0.0742542	3.52227	-1.52983	-0.826942	-0.800144	2.90944	-0.356942	10.4023	6.86137	7.92162	-0.350054	-1.23934	9.26504	-1.23795	0.398022	9.64527	1.11495	2.40305	-0.272282	5.08756	2.86146	5.76997	1.33331	-2.24812	-0.690486
SYNM	-0.476528	-1.55766	0.437292	-4.1175	-2.51518	-2.72841	1.50701	-2.31106	8.27664	4.91933	5.18832	-1.81869	-4.36048	7.48223	2.80382	1.3364	6.91823	-2.47922	-0.531611	-2.45972	2.8182	-0.0272059	2.68867	-1.2886	-5.85643	-1.99538
LTF	9.44928	11.7824	11.7675	11.2499	9.00345	11.8563	1.23746	9.71884	6.194	8.01058	6.46778	8.91124	11.2929	9.70762	-1.13804	-2.27628	7.27899	2.39859	5.12883	10.654	7.63	8.01383	7.79679	11.1085	11.468	10.4254
WFDC2	7.26467	6.27487	8.04123	6.82645	4.28121	7.96165	2.41103	4.7241	5.79133	6.57864	3.41619	7.91415	6.92555	3.51314	-1.29646	-3.84732	8.52757	6.57721	9.10162	5.85884	9.64205	7.68058	8.95927	6.50264	8.004	8.53339
PDLIM3	1.1257	-4.88226	1.85309	-2.14701	-2.62493	-3.4609	3.24159	-3.23398	6.58047	3.50848	4.77171	-2.20526	-3.3472	5.71655	-4.08892	-2.04673	6.21073	2.63315	-0.222313	-1.91761	3.13916	1.57954	2.472	0.18123	-5.19723	-2.36546
CP	5.54545	6.1332	4.42476	7.05486	6.16467	3.21073	1.09859	7.67849	-0.334478	4.80779	1.44566	6.38802	3.94356	6.32317	-3.8294	-5.16763	-1.44506	0.147984	-2.64923	6.97506	-0.560102	0.237551	-1.2622	4.39956	5.01481	3.68066
OLFM4	8.85909	12.4435	12.1476	12.0177	10.194	7.95297	7.06522	7.08306	5.96075	9.61871	9.77936	9.52723	12.6942	12.1248	-0.00433893	-2.52731	9.00446	3.62922	8.17291	10.4017	9.21387	9.11284	9.49066	11.7242	11.9499	7.81084
MMP1	6.27664	8.4126	7.61854	8.74625	9.43488	3.13099	2.30401	5.35305	1.92566	8.57569	-0.134072	1.41415	6.63374	5.37848	-2.73528	-0.537912	-1.34947	2.42589	0.336295	6.13648	6.47246	7.76553	-1.12867	5.96358	5.63476	7.08501
FLNC	1.13097	-0.967115	2.94241	-2.38106	-2.60354	-3.29896	2.44167	-2.79356	7.48349	4.29238	5.48579	0.108518	-3.55184	6.75527	3.07716	1.43328	6.17703	-1.24054	-1.20457	-1.57254	3.71764	1.29235	2.53751	-0.519967	-5.67255	-1.605
MFAP4	5.29823	-1.74726	5.82885	-0.457526	0.836482	-1.2274	8.53643	-1.10978	7.32954	6.30754	8.23536	4.76805	-1.91944	7.58216	4.82574	2.24186	7.13239	5.90134	1.3306	1.8291	6.25616	7.00654	3.41796	4.3133	-2.22399	-1.01366
ACE2	2.23315	-2.00591	1.0882	-3.21561	-0.67746	-1.85211	3.35053	-3.38834	3.33109	1.40289	0.35443	-0.936047	3.69933	0.854674	-3.19887	-6.26913	6.19536	2.5812	8.08981	2.4434	6.93769	4.82829	6.9221	1.62468	0.274614	0.644484
BVES	-1.67481	-3.07675	-1.59745	-4.99454	-3.84036	-5.26108	-0.176644	-4.02395	5.27067	2.34742	3.00966	-5.10022	-5.14967	4.36795	-5.47534	-5.25959	4.08726	-3.19336	-1.44847	-3.05159	0.801208	-1.18337	-0.311623	-2.64777	-5.98851	-2.56878
GPX2	11.3307	11.5529	9.35213	10.5889	11.5461	11.0454	5.09078	10.1074	6.04136	9.29937	7.48283	11.2402	10.7974	9.42062	-0.476699	-2.51104	7.99854	6.3585	7.39793	10.8745	8.41726	7.92898	8.53596	10.9644	11.9795	10.6509
CLCA4	6.06253	7.78022	7.58598	5.09565	5.32708	3.13163	5.5018	-0.278337	4.59174	7.18992	1.83261	3.15035	6.67658	4.88818	-3.62587	-4.70418	7.256	3.91831	8.80396	5.74224	8.30297	8.20965	7.74028	7.21724	7.76276	9.34266
SYNPO2	-0.457473	-1.09639	0.784336	-1.67808	-3.46861	-1.25901	2.71212	-2.43703	7.69192	4.33743	5.6148	-1.57634	-2.80516	7.09942	-0.991146	-1.62242	6.71924	1.42539	-0.3044	-1.38844	2.73272	1.01953	2.00764	-0.368406	-3.47453	-1.85771
CXCL8	5.43133	8.98677	8.87618	9.13815	9.83487	7.54419	5.41186	7.85996	7.36351	11.0412	2.87669	4.19927	5.97538	9.42162	0.607588	1.6673	0.23325	2.99256	0.11402	7.58913	4.20009	8.50396	-1.09578	7.95677	6.27154	9.8419
CLEC3B	4.08784	-1.9264	5.22049	-2.17188	0.214585	-3.00615	8.12578	-0.154353	3.92078	-0.170756	4.46783	3.41015	0.0481246	4.16039	9.48048	9.92967	5.29138	5.58615	1.55538	-1.21368	6.229	4.39406	5.35714	3.8704	-0.357335	0.593593
DLGAP1	1.26701	1.20206	0.509017	2.85011	2.07058	-0.164871	-6.8869	3.26073	-3.04235	-0.161474	-5.23488	1.97751	1.93959	-0.869546	-4.75332	-5.29554	-4.49937	-6.99481	-5.71034	3.51242	-5.08485	-5.02145	-5.23374	0.513278	0.709635	-2.0478
ABI3BP	0.738846	-4.04566	1.79608	-4.03208	-3.89738	-4.02698	4.16284	-2.9615	1.85919	-1.00695	3.65002	0.285248	-4.86459	1.01984	6.46407	5.77852	2.53365	2.77879	-1.61385	-5.81269	1.57783	0.781511	1.25134	-0.758748	-3.72761	-4.71187
LRAT	4.75917	4.49802	3.35072	5.30622	6.13463	3.5929	0.798805	5.42588	-0.200109	4.69117	-2.40267	4.05572	5.12941	4.24696	-4.40148	-5.2043	-0.630139	1.04672	0.20573	6.69638	0.413854	0.652519	-0.436504	5.40639	4.73078	6.59878
ENPP6	-3.12493	-4.85728	-5.30758	-3.76579	-5.62379	0.720016	1.53276	-6.52578	-0.749118	0.93879	3.21428	-3.42768	-0.369045	-2.01856	-4.65998	-6.45456	3.02708	-1.13233	5.87054	0.295946	2.15644	-2.3671	2.52458	-1.41846	-4.18057	3.97436
CLCA1	5.0053	8.31936	7.6256	7.49809	5.99699	10.2768	1.34278	4.3148	7.6028	2.33934	-0.394039	6.09286	8.57862	5.80868	0.0552373	-2.65542	9.79252	5.02935	10.9629	6.27036	8.75068	7.50028	10.5394	7.38525	3.97838	5.08229
MUC20	6.78156	5.32763	3.51687	6.48055	6.17339	6.53205	-1.12762	6.6391	1.52616	3.79126	2.06126	7.39325	5.55782	3.78229	-4.88438	-4.28662	2.28878	0.976796	3.63484	7.70501	4.53494	3.09978	2.72108	5.97528	5.043	2.91358
AGR2	8.398	8.56437	9.58498	10.1495	9.26941	9.62181	2.45118	8.21049	5.21647	6.86609	3.67503	9.51469	9.71916	6.90188	-1.60141	-2.7552	7.64865	5.63117	7.93858	9.25271	9.48756	8.79082	8.23482	9.62898	8.27103	9.2375
LYPD8	6.23732	7.32159	7.00429	3.8722	4.5428	2.46956	2.28517	-2.30715	5.82501	6.23455	0.543565	2.16641	7.36237	2.20703	-1.03945	-2.82797	7.93723	5.30266	9.39247	6.17715	8.73969	6.48854	8.77499	7.07651	5.9949	3.82398
SFTPD	8.88044	8.83858	7.73451	8.73226	8.30615	7.98317	2.47827	9.5969	4.38843	6.53508	7.89437	8.36503	8.10389	8.21434	-2.84863	-3.4103	8.01813	4.99465	7.7612	9.12512	8.70191	6.30276	8.41162	8.43964	7.83897	7.42341
EPCAM	8.04877	9.21417	8.54836	8.81753	8.94311	8.81478	6.48713	8.48378	6.58326	8.53995	7.03751	8.42477	9.6702	8.22084	-1.35469	-4.04073	9.05959	6.66825	9.99653	9.45019	9.61834	8.24589	9.56164	9.08823	9.23142	9.42998
GUCY2C	2.9282	4.32423	4.41413	1.06601	1.27653	2.89727	2.74905	-5.30894	3.00545	3.40794	3.59236	3.85605	4.96022	2.28973	-3.87292	-6.23805	5.66496	3.28223	7.12437	2.95058	6.25736	4.87492	6.34562	4.89621	5.57868	5.54577
NOXO1	5.77246	5.9443	5.48007	5.2397	4.96341	7.05297	-0.97082	4.61969	2.93941	0.84498	1.41067	3.48818	5.61402	4.2955	-3.84193	-2.30706	4.86792	-2.39462	4.44012	5.97218	5.05405	3.50626	5.15816	5.24315	6.40898	6.66337
BMP7	5.3654	5.36453	3.88362	5.92511	5.95052	4.73362	-1.0759	6.33767	1.26282	4.03685	1.22389	5.84145	5.45143	3.34768	-5.84202	-5.73643	0.659769	0.663718	1.50522	6.38611	2.05322	1.65831	1.30795	4.7053	4.66895	4.72851
SPINK4	8.95113	7.50649	11.8421	9.86929	8.83664	7.99612	1.30458	6.9183	8.64602	6.30929	0.845133	6.98515	12.0951	8.64136	1.17358	1.82894	8.24444	6.07212	9.54886	9.53553	11.572	11.9324	9.07131	11.9137	9.33048	10.4883
FCGBP	6.67823	8.66197	8.90339	7.51106	5.76032	9.1484	0.460334	7.2087	5.94222	4.38162	0.214585	8.58948	8.38021	5.57769	-1.00201	-2.23629	8.30636	3.03741	9.21896	7.1789	7.39466	6.21661	9.12968	7.69886	6.92158	5.00028
CLDN2	-0.0713197	2.26122	2.58596	1.65416	-3.09413	1.42757	0.237343	-5.42504	0.98413	1.86727	-4.36584	1.97046	1.79178	1.11573	-5.01754	-6.46497	4.64532	0.822991	4.68333	0.431944	4.2652	2.17989	5.24893	2.0627	2.88537	-1.55383
ST6GALNAC1	3.46246	6.52923	6.58986	5.50008	4.6777	5.71835	3.11559	4.83808	3.80023	5.71003	6.04149	5.86373	6.45549	-0.359599	-3.07486	-4.97682	5.87611	2.59154	7.08637	4.98235	7.51046	5.98068	6.74653	4.94155	5.36032	3.77377
CLDN3	7.44664	8.25107	8.32315	8.1319	8.12694	7.09575	5.09603	8.41295	4.77132	7.02339	7.52276	7.39998	8.71196	6.05257	-3.16804	-3.30241	7.08863	5.10256	8.43323	8.35266	8.3241	6.92028	7.54846	8.04808	8.35362	9.38205
BCAS1	2.3769	1.48479	4.23162	3.75131	4.01439	3.90917	1.37769	3.55611	1.82026	3.32757	-5.05845	4.65434	4.6726	-0.225088	-5.2474	-2.62822	3.87776	2.49945	5.12227	3.91168	5.41463	3.54173	4.63639	2.15723	-0.805467	1.79678
MUC17	3.91431	3.40961	3.3421	2.31555	2.816	2.45713	0.581496	4.93553	-0.892095	3.62254	-1.62785	1.94367	3.01546	1.55524	-5.57077	-7.91262	3.55084	1.6366	5.85201	3.20884	3.89907	2.6948	4.28562	2.24072	2.81752	1.95968
SULT1B1	3.92362	1.26737	4.95741	3.06255	3.38419	4.46951	0.720795	-3.13219	3.9102	2.19182	1.50957	1.15164	4.83345	2.84111	-2.20522	-4.00167	7.35358	4.77951	8.27945	3.93462	8.12168	6.2268	8.0342	5.56054	5.73611	5.8865
MYLK	2.13216	1.71024	3.44917	1.26474	0.382402	0.640427	4.21677	0.226188	9.13845	6.62352	7.23795	2.52567	1.19288	8.68917	-0.953185	-0.576435	8.76404	2.44102	1.97463	1.03929	5.17739	3.65908	3.88207	2.05707	-0.785654	0.736917
MEOX2	-1.02587	-4.38866	-2.26415	-3.14743	-5.56642	-3.39275	3.39006	-2.89834	0.249178	0.646577	2.05266	1.06409	-3.26291	1.49996	6.63177	5.89524	0.115513	2.69513	-1.54369	-2.67748	0.180543	0.577044	-1.01494	-0.3198	-5.12404	-5.54092
IL1B	0.776719	5.3917	2.82567	5.9645	4.1229	3.55399	0.496381	2.66752	2.81496	7.96169	-1.07351	1.096	1.77878	5.25774	-3.08353	-2.554	-2.75886	-0.530529	-3.65673	4.04768	1.32066	4.32675	-2.52693	3.69033	0.176182	5.21263
FNDC1	0.277283	-2.90056	2.82028	-1.48621	-4.18679	-4.00036	2.61364	-5.34665	1.71174	3.04365	4.43526	2.40835	-4.10983	1.00476	-1.34646	-2.86184	3.06717	1.79381	-3.17664	-2.98507	2.5611	3.16341	1.01887	-0.418601	-6.70949	-3.24999
PTGDS	2.28607	-1.31468	3.86496	0.250367	1.27484	0.911323	6.3128	-0.155346	5.63715	3.53439	6.15454	2.51156	-1.52314	5.45875	8.47134	7.90257	6.50022	3.70272	0.603957	-0.0274397	4.37187	2.69739	2.57386	0.910349	-2.02228	-2.76611
HOXB13	4.3356	4.9405	4.57143	5.76912	5.96457	5.87769	0.96547	6.61255	3.10671	2.3865	2.5763	5.79811	5.99596	0.611616	-3.29879	-3.00246	6.29255	3.50384	5.51071	6.41691	5.90249	4.15515	7.144	3.97701	3.134	2.15274
TMEM236	1.63398	3.72185	3.98798	-2.47901	-3.15462	-1.9931	1.94394	-3.11236	1.96108	1.91861	2.1115	-1.2915	3.64668	-1.48899	-1.86802	-5.42415	4.74439	1.54285	6.99597	2.4236	5.67867	3.93569	5.09864	1.13225	2.96085	1.45447
PDZRN4	-2.89323	-5.4798	-1.81296	-4.80929	-4.66417	-5.48536	-4.87517	-4.99196	3.65195	0.815887	0.87871	-5.97187	-4.34672	2.34101	-4.71832	-4.94603	2.77834	-4.30284	-2.45319	-3.11251	-0.589322	-2.4331	-0.636066	-3.86024	-5.20314	-5.62638
ERN2	3.61167	4.49305	5.12673	4.78088	4.05625	5.17532	-2.12288	5.01161	2.32718	4.38133	-0.651201	4.10841	4.78319	2.30691	-5.62822	-5.5767	3.68567	-0.0989906	4.28559	5.39558	4.20589	3.02262	4.4487	3.78951	4.03912	3.97451
CTSE	3.8793	0.425513	4.62388	5.45946	4.41907	3.84601	-0.173912	2.27713	0.76074	2.85983	-0.648838	4.63024	4.83584	-2.82817	-4.18055	-3.04512	-2.88875	-2.82207	-1.31284	4.13021	3.58374	3.09975	-3.40393	2.71643	2.35957	1.95179
MYL9	4.33915	2.97842	5.21277	2.90154	2.90688	1.79849	6.59847	1.61834	10.9169	8.24084	9.33716	4.58571	1.99982	10.2151	4.56119	3.70063	10.8196	4.10136	3.41232	2.92922	7.2447	5.62987	6.32863	4.45182	0.711988	2.92086
PLIN4	-2.71752	-2.71258	-4.27066	-4.247	-5.25936	-3.46009	5.06554	-4.47855	2.49775	-0.213691	0.230363	-6.61164	-4.78008	1.56412	-4.05262	-5.79405	1.53221	0.8166	-5.31822	-3.43292	-1.37824	-3.44075	-1.59382	-3.92786	-4.65961	-6.28647
SPDEF	3.80306	4.52328	5.45507	4.73731	3.57214	3.96182	-3.56568	3.23848	2.32527	3.22283	-3.61962	2.76114	5.59832	1.94713	-3.611	-4.58374	4.71553	-0.878849	4.88132	4.62583	5.13136	4.4351	5.2153	3.6004	3.8214	2.56196
TTC22	5.20167	5.09546	3.66198	5.30832	4.27642	5.61316	2.31077	5.98329	2.58606	4.33472	2.10601	5.61493	3.92711	1.92221	-3.9859	-6.43669	5.67854	2.20677	6.63138	5.57004	6.39208	3.42343	6.27576	3.86172	4.23642	5.20439
TPM2	3.87876	2.61207	5.11104	2.73961	3.07396	2.30488	5.82956	1.0129	11.055	7.8651	8.32867	5.27528	1.41654	10.2377	5.24231	5.15914	10.2936	3.67723	3.1553	2.23792	7.37054	6.00162	5.94942	3.93058	1.29788	2.58755
SLIT3	0.192106	-1.41289	1.67097	-0.0939329	-1.25225	-2.68301	6.8962	-1.0153	3.732	3.43465	5.88567	3.81426	-2.9948	3.48785	6.40175	4.82058	2.15895	2.44731	-1.17274	-2.05655	0.965721	3.16822	0.971803	1.02184	-4.1075	-2.59068
CFTR	3.47979	6.25674	5.70095	4.04369	2.27101	2.04355	0.669635	1.22178	2.68788	2.61259	4.38937	1.84939	5.01818	3.86832	-3.55945	-6.70687	5.7821	1.76067	5.93776	1.87902	5.19954	4.05489	6.51808	5.70956	5.39362	5.42804
KIAA1324	1.50536	3.30843	3.93511	3.49494	2.9724	4.92653	-3.29346	1.5194	1.09207	2.86635	-2.14515	4.41775	3.61292	-1.25535	-5.60859	-6.00152	2.78864	-1.02253	2.90755	4.51539	2.881	1.28813	3.5184	2.68823	1.60501	2.65309
PRRX1	0.568061	-1.95373	1.87097	2.25588	0.245009	-1.90859	5.83603	1.506	1.61936	4.61246	5.74465	4.43602	-1.1053	2.19924	5.52822	4.31944	-0.613494	4.03992	-2.86916	0.0544873	1.75703	3.87892	0.779596	0.780226	-5.77604	-2.01463
RBPMS2	0.869658	0.786488	1.10599	-0.406405	-0.351389	-1.92579	2.98213	-0.719153	7.22502	5.48562	5.18854	-0.292701	-0.392493	5.88541	-3.17233	-3.11631	6.46584	0.984553	2.67722	0.682259	2.99733	0.731366	2.90739	0.755802	-2.02988	0.215418
PPP1R3C	0.641602	-4.51277	-3.07047	-1.16955	1.4049	-4.5213	1.45866	-2.81348	4.14102	0.232513	2.96334	-0.0624778	-5.42385	3.45583	0.722466	0.594721	3.09517	1.49858	-1.03517	-0.192826	0.35035	0.179447	-0.458041	-2.04743	-5.2684	-5.63459
PODN	0.469459	-1.98258	3.259	-1.09245	-3.29049	-1.19327	6.27796	-4.36187	3.40699	3.29395	3.74225	3.18258	-3.12482	3.92452	5.51104	3.96852	3.58848	3.26311	1.03066	-1.24059	3.18793	2.96739	2.44599	1.05836	-4.2798	-1.59485
SLC38A4	5.52269	3.93021	4.03954	4.66258	4.02453	5.26754	-0.103792	4.75034	-2.82415	-1.76929	6.12809	4.0628	3.84162	4.00321	4.75945	6.1557	5.20342	3.70034	-2.37432	-4.33966	4.85979	6.38708	6.01235	5.08955	5.12483	6.14009
CEMIP	2.55838	4.0242	3.13941	4.65955	3.64544	2.65549	1.64985	4.55723	0.740634	5.38175	1.12568	0.956488	2.47368	1.82494	-6.52805	-6.41083	1.09005	-0.544203	-2.65003	4.64731	-1.24028	0.568421	-1.80834	1.74592	2.01557	1.35652
ADGRF1	4.93231	0.981363	-0.0599039	4.5113	4.19883	2.61981	-0.486323	5.33579	0.344238	-0.804259	-0.586304	5.19114	0.127039	0.0126116	-4.34737	-4.17907	-3.36101	2.23064	-1.93184	4.57378	0.409027	1.01406	-4.13444	1.76604	0.950476	-1.33509
NKD1	5.79126	5.66973	1.26807	6.03157	6.40027	5.09057	-0.0794262	7.16832	3.48885	1.93908	3.09192	5.68704	6.83798	3.29928	-0.497331	-2.08323	3.31545	0.936915	-1.13913	7.06597	0.681854	-1.4472	-0.780374	5.38357	5.22363	1.30975
CLMP	1.76506	-0.167157	1.76835	1.30479	0.187527	-0.750601	3.78454	0.113127	6.30867	5.0334	3.49996	0.899044	-2.31368	5.53842	-1.1182	-4.16835	5.97827	1.59893	-1.32207	0.415185	2.63621	2.97125	1.34135	0.35461	-3.77527	-0.12614
DPEP1	3.70796	1.74487	3.73983	0.617947	-1.1995	1.00996	2.74828	-2.73487	4.43602	4.16304	1.98919	1.69556	4.87141	2.05715	7.30279	6.83785	7.25219	3.99798	9.12081	3.97008	8.3411	4.52269	7.89748	3.44513	2.35703	2.05942
PLXDC2	1.05576	-0.0171411	2.14887	0.555198	-0.965097	-0.18248	6.04183	-0.527897	4.06605	4.05483	4.90971	4.30305	-2.78928	3.56941	7.25859	6.12486	1.5937	3.35748	-3.80044	-0.148238	1.99465	3.47296	-0.0490091	0.602219	-3.6453	-1.00022
GJB1	5.18134	5.86654	4.75459	5.72652	5.86836	4.43336	1.59918	3.08004	2.96475	4.66101	3.48628	5.11572	6.00202	4.51212	-3.41682	-3.37466	6.14725	2.24516	7.52012	5.55627	6.69067	4.02653	6.79988	5.21096	4.97152	4.58912
ADGRD1	-3.08472	-1.86544	-0.023195	-2.57471	-2.6932	-5.48283	4.17758	-3.94386	1.09965	1.08518	1.89486	1.61473	-2.8449	0.790513	5.98413	4.67854	-0.0934234	1.05517	-3.86727	-3.91005	-0.166001	0.881524	-0.435117	-0.188297	-5.17407	-3.36237
JAM2	1.77899	-1.00959	2.69862	0.79033	-1.70744	-0.975992	6.61611	-1.85178	4.92804	3.77202	4.32685	3.25057	-2.40879	4.6348	7.65528	7.99818	5.16524	4.50547	1.25331	-0.289323	3.20959	3.29178	2.4849	2.66106	0.103827	-0.879648
ELF3	6.79501	8.17543	8.30145	7.89231	7.02785	7.55925	4.11295	8.08622	4.42108	6.3729	6.31075	7.21957	7.53778	5.7988	-2.20916	-3.36919	6.43643	2.74764	8.00629	7.57773	7.07072	6.38097	7.0332	7.01578	7.75385	7.57658
COL14A1	1.66924	-2.03046	2.95819	0.526189	-1.10955	-2.61735	4.03744	-0.333543	3.41296	3.19068	3.24023	4.90563	-6.17723	3.20951	0.0166104	-1.46941	1.6011	2.10564	-0.898969	-1.28711	2.84794	3.01329	2.17717	1.16015	-5.04607	-2.30264
ARHGAP6	-3.52332	-1.96649	-0.865458	-3.28674	-4.18337	-3.40541	1.56773	-6.05639	3.41834	1.89554	1.28909	-0.645638	-4.82223	2.90905	2.30594	1.77587	2.98345	-0.0101751	-1.55375	-3.37736	0.0993625	-1.15269	-0.792185	-2.92602	-4.11093	-4.58843
HSPB6	2.33488	2.76382	3.15472	0.479707	0.80719	0.28584	6.82688	1.20543	8.8742	6.52376	5.64658	3.93767	-0.451934	7.45291	8.33753	6.83174	7.46433	3.74361	2.04854	1.49989	4.88939	3.95567	3.34693	2.35175	-0.410935	0.973589
CCDC3	-0.494853	-5.43864	0.241743	-0.60665	-3.80999	-6.44777	2.86519	-6.53921	1.43587	-1.12023	-0.263648	-1.68044	-6.32841	-0.362343	-1.75917	-1.64634	1.10371	3.24114	-2.93474	-2.62802	0.373654	-0.526845	0.0253123	0.21579	-6.18243	-4.27274
TFPI2	3.50937	2.55487	5.88415	1.43412	4.49795	-0.935901	4.54762	1.50903	5.00081	7.98479	6.61816	4.81121	1.76887	3.21608	-0.727045	-0.111577	-1.8515	4.11162	-2.44332	0.236952	2.41251	5.19285	-3.58409	1.45379	1.29941	1.36042
CACNA1H	-1.15752	-2.27055	0.168077	-3.43761	-4.56017	0.221506	1.27829	-5.69671	5.25025	2.60769	3.20656	-2.64721	-1.03353	4.10606	1.38277	1.25662	3.69175	-1.43877	-0.97785	-2.10592	0.395337	-1.57981	0.698058	-2.07222	-1.992	-3.5974
PKD1L1	0.242621	2.17768	0.659358	3.78218	2.6016	4.32751	-1.44238	3.80043	0.233029	0.66226	2.60118	2.43835	1.25479	2.59694	-7.0302	-5.39995	-1.31525	-0.691658	-1.86115	3.69499	-1.17839	0.189793	-1.06358	2.25771	2.71982	3.59636
LAMA2	-1.79883	-3.2857	0.586933	-2.57949	-2.13362	-4.71646	2.7751	-5.27331	0.493053	2.36024	2.46826	2.33704	-4.52116	0.489379	3.60348	2.8796	-0.500781	0.841506	-3.90466	-4.45401	-0.0444536	1.77972	-1.1259	-0.800995	-5.38961	-5.24854
ALDH1A3	0.721154	-1.75616	2.33907	-2.16816	-2.87104	-2.86033	5.90185	-0.765185	4.08859	3.68225	1.84094	2.34257	-1.9234	5.87186	-2.0766	-0.713384	1.61823	2.46296	-1.17048	-1.46435	1.61022	1.3238	-0.18332	-0.333547	-4.58529	-3.69262
CA12	0.682807	1.33834	0.663836	2.19294	0.982276	-1.85039	3.83656	0.927183	2.69819	3.7556	-2.5404	4.49593	1.93975	-2.49231	-3.83773	-2.69647	4.76791	0.459799	6.47277	2.63068	5.29624	2.33169	5.6969	-1.06548	1.57758	0.696145
ABCA9	-1.96449	-2.53106	0.360735	-0.847059	-3.00761	-1.61868	4.71916	-2.47033	2.00503	1.09975	1.56542	1.8008	-3.60101	2.17603	7.26098	6.38583	0.842182	2.83816	-2.81053	-2.10183	0.874073	1.1377	0.34293	-0.960878	-3.84777	-2.27452
F13A1	-4.00311	-0.967129	1.3892	-2.92017	-2.27997	-3.48143	6.49686	-3.78133	3.95559	1.71721	0.942773	-0.591214	-4.02108	0.98735	2.40798	3.14203	0.575303	2.51268	-3.28153	-2.05062	2.11861	0.7185	-0.780939	0.466121	-5.20639	0.264512
HSD17B14	-1.0483	-0.10864	1.86786	-1.4486	-1.7496	-3.84208	4.61494	-3.83728	3.40829	0.789813	3.7981	1.31478	-1.04822	3.10882	7.00302	6.62891	1.92379	2.49844	-0.521306	-2.01734	1.63067	1.64489	-1.13927	0.546443	-2.51631	-1.80417
PLEKHS1	2.72181	-0.449247	1.05677	5.0062	3.54677	5.73006	1.43988	3.60837	0.863518	3.2595	-1.49826	5.3946	2.91886	-0.254764	-3.68614	-2.14289	-1.20287	1.87054	-1.25788	5.66117	-0.806218	0.157057	-0.737055	0.567195	-3.07378	-1.85319
TAGLN	6.39514	5.54905	7.98418	5.44004	5.44649	4.23635	9.96395	3.10797	12.8241	10.1782	11.0236	8.08863	4.09167	11.7027	9.51735	9.63523	11.5951	7.06666	5.01959	5.21947	9.43609	8.71907	8.219	6.87961	3.62426	5.47898
C2orf40	3.73547	-1.72941	3.24096	0.021366	3.70075	-1.06318	3.05884	5.94536	4.2639	2.72827	3.15819	1.69324	-1.161	3.98014	-0.617291	-0.153315	4.67414	5.64623	-0.421964	2.85636	3.42373	3.20525	1.09289	1.31832	-2.04171	-3.61282
PGM5	2.17423	3.41901	2.72883	0.591182	-0.233057	0.205055	4.30091	-0.111558	8.61537	5.91182	6.09812	2.6263	-0.440541	7.55239	-0.473314	-0.479301	7.68422	2.9012	1.5846	1.45436	4.88118	2.85158	4.16582	2.43195	0.580541	1.45565
EFEMP1	0.934615	0.919958	4.87643	2.34548	0.692008	0.465745	8.13922	-1.15352	4.73367	3.49152	6.02434	3.83402	-0.182917	4.30576	9.98519	9.10956	3.56864	4.88866	1.21917	0.739459	4.32054	4.9897	3.25377	3.78156	-0.502176	0.600745
TGFBR3	1.5323	-1.12262	3.37504	-1.86979	-2.00313	-1.68381	5.7714	-2.77559	4.50277	3.42621	2.70893	2.41134	-3.66481	4.4805	4.91549	3.77469	4.56425	2.86452	0.651013	-1.2566	3.26087	1.73952	2.38827	1.45806	-3.73517	-0.268471
LMOD1	1.18945	0.671764	2.15174	0.211685	-0.825583	-0.483995	3.78198	-1.33287	7.02635	4.88734	4.90157	1.55509	-2.63203	6.28337	0.942361	-0.0843261	6.51597	0.880952	0.0216645	-0.555021	3.78653	1.17511	2.74311	0.481495	-1.57415	-1.46922
TM4SF4	-1.48523	0.366935	-0.208929	-0.915266	-0.624397	5.32874	-2.92857	6.44442	-0.870867	-4.40279	-1.53196	-2.83374	3.38893	2.27509	-5.19488	-4.99424	1.05581	-3.50778	-2.75408	-1.76216	-0.368911	-0.556869	0.539323	1.46559	1.6008	1.56017
SIDT1	3.6219	3.96574	4.00419	3.84968	3.21644	4.47318	0.377757	4.87408	3.18412	3.68479	0.49211	5.52998	4.33491	2.16495	-3.98911	-5.14254	5.51397	2.18267	7.16764	5.53079	5.13087	2.95462	6.24357	2.92976	3.53203	2.0989
GHR	0.173051	-1.12783	0.609481	-2.34695	-2.40833	-1.62921	5.04691	-2.19492	4.70174	2.03014	3.8249	1.34056	-3.63117	3.7126	5.05544	4.46415	3.23182	2.67966	-0.514186	-1.56392	1.96205	1.56647	0.821563	-0.393683	-3.46986	-1.82837
SP5	4.81699	3.74235	1.23521	3.99681	5.90822	4.02829	-0.849451	5.65628	0.0160398	-1.84317	-0.626943	5.72102	6.01061	1.41772	1.96782	0.0202711	-0.788013	-2.40986	-0.590962	4.67379	0.147528	0.248802	-0.570377	3.61181	3.83128	3.60673
ADCY5	0.308943	-1.53572	1.05071	-2.33229	-4.12357	-2.86656	2.45428	-5.50244	4.73568	2.1795	3.79928	0.241633	-3.64506	3.62249	1.42611	0.505149	3.61526	0.750212	-1.04465	-1.8204	0.628456	1.36597	0.225028	-0.659331	-3.73804	-2.78589
ASPN	2.37012	-1.02449	4.47521	2.51575	1.61446	0.0511354	5.46119	-1.25177	4.711	4.55943	4.85719	2.61855	0.232747	4.6114	7.07191	6.4534	5.13685	2.92373	0.623614	0.766392	4.12125	5.5849	2.82211	3.27688	-5.19477	0.575583
GUCA2A	6.72637	8.14088	8.70047	6.31881	7.00459	5.56836	2.57431	6.23188	4.01679	5.3386	4.05806	6.37071	7.85338	3.9517	-0.982785	-2.59579	7.49176	8.85668	7.82391	6.9241	8.01578	7.29488	7.84441	6.94084	8.92809	7.09341
AKAP12	0.882987	-0.0935604	3.05266	0.194226	0.161901	0.934064	5.20944	-0.732903	6.3374	4.79811	3.82397	1.15938	-2.41779	5.76725	6.02094	4.28548	5.3374	1.63615	-1.32812	0.447431	2.19484	0.468187	2.32514	0.109414	-3.26415	-0.980537
CLDN7	7.88685	8.13573	7.92762	8.14415	8.28611	7.15039	4.81213	8.03303	4.9946	6.99973	6.38926	7.50612	8.63815	7.04155	-1.45253	-0.494089	8.27668	5.32948	8.9795	8.2528	9.18869	7.58923	8.7964	8.27192	8.03256	8.49791
FMO3	-0.641007	1.20282	0.548121	-3.3742	-2.72657	-1.6672	0.738085	-5.47114	1.66923	-2.53861	0.301986	1.09176	2.78603	-1.52074	-0.783405	-1.47771	5.16093	1.90125	3.67864	-2.01375	4.26676	3.29619	5.49763	-1.25185	-4.10131	1.82161
KRT19	10.0796	9.12946	8.83597	10.4252	10.3061	8.9649	5.36986	10.2353	5.82071	8.56098	5.65883	10.0601	9.39041	8.11167	0.774857	0.641768	8.92859	6.03056	9.01396	10.0743	10.2558	8.49142	9.5464	8.97449	8.41318	8.7077
SFN	4.24491	5.43756	2.86386	5.9103	5.62874	3.92032	-0.329183	6.65048	1.89824	3.78724	0.914748	4.46071	4.99724	3.63674	0.704456	0.32217	-2.74887	1.04208	-1.35459	5.60412	0.924989	3.08583	-2.49159	3.92166	3.99706	5.66771
ENPP3	4.97267	4.4891	3.42804	4.45019	3.43976	5.69685	-0.326822	7.5035	1.61412	1.42406	-1.2965	6.54282	3.59259	2.55399	-3.04833	-2.84097	2.32268	1.7491	3.87875	5.95395	4.03054	2.64871	2.75968	5.35283	4.79598	2.89287
LGALS4	8.73043	8.75638	8.40028	7.72357	7.8506	8.49264	5.61948	7.52217	5.61698	7.90564	5.76516	8.4226	9.39771	6.71181	-1.05642	-0.0921156	8.97178	7.7696	9.49375	7.21039	9.98003	8.35385	9.55651	9.96363	9.32239	8.19272
MYOM1	-0.967256	-2.36865	0.244534	-2.4371	-1.81449	-3.77321	0.685025	-2.14102	4.78932	2.66653	3.28651	-0.345119	-2.57695	4.56329	-1.62235	-0.426765	4.39147	-0.692014	-1.62826	-3.05752	0.306659	-0.291091	0.826673	-0.484118	-3.31623	-3.81107
KCNMB1	0.137254	0.202048	2.11306	0.588267	1.03507	-0.737242	4.07108	-2.15265	5.54085	3.9247	4.9567	2.56941	-1.20991	5.44904	-3.96531	-2.32926	4.86282	0.70225	-0.11943	-0.173433	3.10283	2.93882	1.22564	1.07364	-2.41269	-0.894974
KCNMA1	0.540434	0.78344	1.36553	-3.35938	-2.74115	-0.836586	-0.733306	-1.24307	4.82498	2.94584	4.69993	-0.105209	0.186767	4.34244	-3.91479	-3.33169	4.54433	-2.27693	-0.892899	0.00321363	1.67294	0.562719	1.59944	-1.88699	-1.63977	-2.68088
CSF3R	-0.587836	2.37468	4.48347	3.62621	1.44708	1.20953	4.04131	2.71537	5.9908	5.28546	2.07638	0.250258	1.22189	5.04287	-3.25531	-3.13387	-0.0944473	-0.640787	-5.06452	3.86883	1.41164	2.15599	-1.96728	2.21183	1.00726	3.98006
COL8A1	0.272907	-0.0669169	2.39085	2.3364	0.699596	-0.575824	4.61379	-0.350033	3.41261	5.19582	6.11257	4.76888	-0.356602	4.07044	7.57144	5.83607	1.12889	1.26401	-2.76236	0.64655	2.47698	4.46085	-1.07694	1.90554	-3.43692	-0.404895
THBS3	-0.437686	-2.74461	1.05937	-1.65519	-2.58851	-3.1218	3.51562	-2.26236	2.91266	1.18415	3.25331	0.184547	-3.14518	3.10042	5.62935	5.6593	2.7258	0.866726	-1.7512	-1.80183	0.942939	0.961675	0.467509	-0.532512	-3.62544	-2.83865
PTGS2	3.01553	6.623	5.70426	6.62187	6.32914	4.23525	3.24436	5.32127	3.09163	8.183	-0.9006	-0.649883	3.58858	4.44502	-0.492066	-1.08846	-0.600453	0.615642	-0.137738	4.14661	2.47656	4.23006	-0.594611	4.03764	2.31982	6.15923
ARHGEF25	-0.532612	-1.0545	0.718929	-0.791365	-1.45343	-1.74874	3.19852	-2.56173	5.03898	2.29714	3.94317	1.06437	-0.893912	4.06995	6.08498	5.59486	4.00544	1.21972	-1.9003	-1.18846	1.89079	1.62596	0.89981	0.0077122	-3.66479	-2.18958
NEXN	2.14341	-0.073287	2.70414	-0.79633	-0.723723	0.236315	3.03238	-1.61782	7.01471	3.64105	5.55201	1.44433	-0.793112	5.87186	-1.09581	-1.70692	6.3259	0.889287	1.53402	-0.395376	3.8564	2.77067	3.33868	1.71074	-0.613617	-0.831589
FBP2	4.24006	3.25867	4.58128	-2.86032	-1.76002	5.26725	2.85201	-3.64419	2.48309	3.80727	3.35847	1.28809	4.83716	1.74025	-0.833272	-0.1933	4.94495	3.21079	5.07029	1.26184	5.23616	2.97864	5.51229	5.21047	4.79544	3.87534
SLIT2	0.850263	-2.77796	1.83948	-2.31937	-1.83289	-1.06996	3.41508	-1.19991	2.43781	2.25222	1.80072	1.30347	-2.32837	2.84603	5.77879	4.8193	1.51744	1.84565	-1.48535	-3.07792	0.687553	0.457584	0.972531	-0.444457	-6.1866	-4.25392
SVEP1	-1.30277	-2.46228	1.82224	-0.932945	-2.13744	-2.08822	6.37074	-4.03276	3.821	2.50037	3.03812	2.20343	-2.58794	3.28274	-0.838288	-0.788684	2.39066	2.72729	-2.04856	-1.60466	0.492653	1.63718	1.16854	0.400724	-3.55236	-3.38033
SERPINF1	1.69166	0.140347	4.21435	2.65606	2.27473	-0.157369	7.23784	-0.496136	2.92464	5.58385	6.97647	6.38323	-1.73547	3.30877	1.65171	-0.0402877	1.7301	4.37816	-1.1052	0.20196	4.26583	6.34785	2.50324	2.86946	-2.85182	-0.337514
TNC	1.66137	3.8472	4.07002	3.54288	1.54485	-0.0904511	0.809332	2.45935	6.43314	6.25487	2.04613	1.81311	1.5658	6.46711	-3.84822	-3.32319	5.15262	-0.228047	-1.15226	1.52162	3.62167	3.50552	2.03153	0.817337	1.85002	2.31175
SLC3A1	2.50408	-1.01207	0.872679	-2.26721	-1.74882	-1.55057	0.0265168	-3.76952	0.869563	-2.19219	0.0696747	-1.43592	3.44968	-1.51299	-3.18917	-1.06008	3.38689	1.77536	6.68724	1.63541	5.22498	2.47915	3.79417	4.03979	1.15614	2.76417
CYP1B1	0.839839	-2.02496	-1.05406	6.45766	4.57313	2.41695	7.49121	4.25366	0.843124	4.84683	4.85894	4.58978	0.810904	2.51699	5.99566	4.7625	2.07994	4.69618	0.693739	2.56105	1.47554	3.22476	1.84414	-0.528515	-3.50555	-0.327821
FOSB	5.24681	6.56245	6.78844	8.5757	5.69329	8.24329	7.75974	5.59586	4.31448	2.9701	0.822102	-0.498772	4.95144	4.1075	1.86852	0.811298	2.38456	2.50201	5.23652	6.21647	5.20437	6.06885	0.247599	7.35228	3.79696	6.61896
GRHL3	2.44981	2.22178	0.343703	3.23817	2.88464	2.5606	-3.13985	4.31318	-3.0553	0.558924	-1.00883	3.34376	2.47045	0.180848	4.32559	2.89052	-4.04006	-2.51682	-1.69828	3.29574	-1.59237	-0.963062	-3.08126	1.6242	2.58733	1.50199
MAP1B	0.632948	-2.5925	1.00224	-2.0068	-3.31397	-2.4794	2.20068	-2.51534	4.02447	1.56527	2.94409	-0.519032	-3.6136	3.1766	5.16664	4.19876	1.70074	-1.07644	-3.24492	-1.59431	0.339844	-0.871625	-0.386423	-1.43574	-3.88931	-2.4158
DPYSL3	3.08022	1.88445	3.93867	2.76935	1.64336	1.19285	7.54525	1.74624	7.83712	6.67699	7.42411	5.29093	0.453628	7.32825	8.97635	7.15326	6.53472	4.54839	1.20619	2.68107	4.26	5.55929	3.22902	3.09771	-0.0255691	0.676764
GPA33	3.72987	4.7507	5.05457	3.7391	3.61147	4.90458	3.40432	2.24694	3.85069	4.22296	4.25329	2.87688	5.41017	2.56435	-1.77911	-4.73505	6.83591	3.8473	7.92202	3.78839	7.80929	5.34641	7.42235	4.60716	4.02253	4.84992
LAMA3	2.53495	3.64867	4.45813	3.73474	2.57042	1.79599	0.396675	3.77212	0.773836	4.26319	-0.503186	3.03121	2.64801	2.86348	-4.837	-6.68788	2.89433	0.717131	4.4188	4.14453	2.51842	2.51157	3.66157	2.56758	2.05729	4.28082
FGF1	0.145625	-3.57366	0.963874	-2.90482	-4.7452	-5.16582	1.38106	-2.67005	2.15089	1.89893	0.854754	-1.13913	-3.23406	3.29934	-1.73491	-3.35254	3.3543	-1.05634	-0.912095	-1.85343	-0.0877763	-0.362126	-0.192253	-1.55183	-5.88992	-3.13615
CAP2	-0.927101	-1.82166	0.382623	-1.34563	-2.14931	-3.06615	0.900676	-3.15982	4.67938	2.11636	3.30569	0.178543	-2.24002	4.34149	-0.378665	-0.099598	5.16288	-0.9344	-2.83259	-1.68281	1.51407	0.957045	0.527791	-0.129777	-3.46812	-2.62361
HHIP	-1.45843	-0.777918	-0.255761	-1.36633	-1.88402	-1.21319	-0.111711	-1.87427	-0.568405	-1.61729	2.83775	-1.30113	-2.90098	-2.14305	7.30124	5.97111	1.64345	-2.76566	-0.313601	-0.405509	1.6487	1.16201	1.90308	-1.87561	-4.09159	-1.83565
C15orf48	5.95871	6.48255	6.1833	6.52488	6.94608	7.08579	3.74472	5.78306	5.66886	5.7815	4.08901	4.94725	6.35699	6.02746	-2.41788	-3.03579	7.14782	4.60424	7.56167	6.69326	7.0393	7.36282	7.87843	6.85661	7.96362	7.17239
CDHR2	4.46793	4.99834	3.95941	2.80685	3.2328	2.80067	1.36858	-0.0641028	2.60923	2.50548	3.04682	2.10043	4.48552	3.28321	-2.8265	-5.02583	5.73992	1.76078	7.70958	3.47341	6.48032	4.01113	6.51288	5.60352	4.88433	3.1583
HNF4A	4.61786	5.9662	5.33062	5.4914	4.75174	4.82892	3.13711	4.34903	3.16592	5.09962	4.79913	4.43787	5.54638	4.24585	-2.89518	-4.4919	6.5962	2.72543	6.89201	5.523	6.22475	4.405	7.13532	4.92709	6.03392	5.78715
LRRC19	0.8292	2.62399	2.11941	0.764643	0.40707	2.07188	1.90344	-3.47828	1.56952	2.29099	0.402777	0.598241	3.0057	2.22527	-3.78944	-5.7568	4.32973	1.83952	5.49655	1.13113	4.55511	3.13417	4.30745	3.38758	2.28044	1.25397
PLCE1	-1.62145	-2.03206	-0.00121093	-3.28358	-3.32719	-3.65107	1.37017	-6.14384	2.90396	1.26045	1.2106	1.19826	-1.79727	0.859023	1.4696	0.318577	2.20187	-0.686325	2.75479	-2.31471	0.138828	-0.617798	2.78399	-2.47902	-2.13232	-7.22676
FABP2	2.27808	1.63779	3.5841	0.824499	1.7474	1.43354	8.16395	-0.997616	0.0233405	5.29226	6.09576	1.05234	3.09001	3.59789	0.515511	1.76303	6.77742	9.07896	4.8112	1.40337	4.25058	4.35533	5.5852	5.94075	2.94767	5.10139
GIPC2	4.05067	5.15745	4.82481	4.15402	3.73232	3.78365	2.60102	2.14707	3.51383	4.06674	4.59978	3.26225	4.85467	2.77929	-2.65655	-5.05614	6.64572	3.2422	7.51525	3.52479	6.93086	5.34772	7.04501	5.23712	4.78181	6.18412
LRRC31	-1.17877	-0.726928	1.58473	-2.55802	-2.60484	-1.99804	-0.682159	-5.64352	0.580184	-2.52275	-4.57896	-1.87991	2.15674	-3.94977	-5.79894	-5.63736	2.21481	-0.211727	2.80861	-0.664825	2.8557	0.631179	3.14644	-0.258265	-0.505117	-2.32077
TRIM22	2.54324	-0.607296	1.33645	-0.351122	-1.87399	-1.53464	4.08313	-1.95355	2.99444	0.598975	3.34126	1.51645	-4.69748	0.69611	0.53965	0.867446	-3.06357	6.37706	-3.52627	0.528561	2.01453	2.27219	-2.04822	1.25691	-3.59846	-1.66463
ECM2	1.78558	-1.55846	1.60132	-1.08174	-3.01777	-0.168037	4.61852	-3.31506	2.1071	1.26034	4.10884	1.31751	-2.68419	2.30544	6.03768	4.79542	2.81587	3.31857	-2.77212	-1.8439	1.42183	1.68713	0.682996	0.728521	-2.73812	-1.47761
GPX3	2.39059	-0.899835	2.6905	-2.17052	-1.55636	-2.50702	4.51516	-0.859996	3.13242	2.88054	1.21618	0.628774	-4.30766	3.97753	-2.20247	-2.68559	3.65691	3.60479	2.71089	-1.54743	3.62818	1.61914	3.03157	1.24221	-3.18817	-1.42833
RSAD2	3.50356	-1.50272	-3.25627	2.97072	0.566523	-0.242062	-0.204547	-1.72946	3.11594	-3.78488	2.01687	0.566309	1.97242	3.65607	1.81716	0.354193	-4.16546	0.422373	0.00324242	3.36373	6.50877	2.12326	-3.59139	1.87024	2.30316	-0.45054
COL17A1	5.79273	4.49879	3.69201	6.91543	5.92338	5.84671	2.10409	7.5265	2.57241	5.52033	3.58481	5.6944	4.11114	4.51287	-2.79882	-3.40742	4.87534	1.5332	3.98498	6.81404	5.2953	4.22913	5.39827	4.77343	5.63081	4.27424
CACNA1C	-2.63437	-2.89653	-1.45828	-2.64574	-3.36322	-4.59767	0.419258	-3.60996	2.49824	0.73754	1.23472	-1.30839	-6.41148	2.12244	-3.59801	-4.27242	1.5427	-2.0764	-4.56587	-3.02848	-2.0125	-1.43346	-1.82173	-5.52863	-5.41336	-4.83921
TNFAIP6	0.00629084	1.01493	4.42352	2.51247	2.3936	-0.511824	4.62211	0.415683	3.06107	4.68913	1.30382	1.64083	-2.60262	2.59853	7.8133	7.52992	1.9514	-0.470075	-3.32723	0.782232	2.03664	2.66589	-0.580125	1.00156	-2.10398	1.449
SORBS1	-1.01903	-1.30678	-0.0635886	-1.02706	-0.854236	-0.198025	2.606	-0.531271	6.64224	3.66091	3.3376	0.960037	-1.17656	5.95504	1.45261	0.318207	4.79199	-0.404781	-1.96476	-0.753692	1.43175	-0.102636	1.33246	-0.474182	-1.79713	-1.93184
TNS1	1.49895	1.8766	2.40917	1.59764	0.348742	0.418697	5.18911	0.40819	7.90647	5.67937	5.51161	3.2196	-0.854996	6.92703	5.56094	4.61491	5.8209	1.62138	0.134431	1.76566	3.23121	2.46701	2.55945	1.47653	-1.3003	0.657265
LPL	0.668382	2.86887	0.196506	0.291085	-0.805931	-0.52197	7.29322	-4.6899	2.85366	3.24084	1.58323	0.982152	-0.06459	2.4107	5.3033	5.75757	3.674	3.29979	2.68327	-0.544504	3.42291	2.63892	-1.63044	-0.869707	-0.223099	0.170963
DNASE1L3	4.21855	-4.86839	2.63668	-0.730088	-1.74225	-1.69764	2.71336	-1.36681	-0.60591	2.32502	2.50227	-0.188715	-3.12616	-2.25485	-1.00594	-0.527643	-1.40497	5.8902	-1.69343	-1.37563	1.54649	1.51194	-2.06886	0.911339	-4.59559	-2.76726
CDH1	6.43716	7.60876	6.77313	7.43783	6.55455	6.59738	2.84863	7.31538	4.66441	7.4631	0.73534	7.49923	7.09993	5.35687	0.712023	0.0787055	7.0759	4.81224	8.24521	7.43407	7.47155	5.77806	7.86895	6.7722	6.03758	6.42999
APCDD1	4.19856	1.96669	1.91996	3.10629	4.90786	3.50598	2.41121	5.82263	0.928116	2.74058	2.07182	6.96429	5.57019	2.42697	-4.69397	-4.68393	1.17392	-0.862276	0.0499513	3.26156	2.68672	2.17147	1.47399	2.54088	2.49414	1.7982
PRAP1	5.34414	3.49517	4.33407	-0.0929063	4.78929	-0.414951	3.92458	-1.8774	2.88608	2.18892	4.16895	1.54507	5.61942	3.01328	-0.121778	1.22924	6.32741	6.26516	7.39214	3.59024	7.30697	5.2475	6.80841	5.3897	5.80646	5.30002
CST6	8.34316	1.86417	4.7917	5.17372	6.00222	8.55651	1.73114	2.36725	5.8283	-0.570147	2.79118	7.86556	4.64811	4.12352	-0.455242	0.682582	6.04535	2.34099	7.68478	8.31943	6.01028	3.12944	6.48451	4.32408	3.64024	5.33095
MSR1	-2.12842	0.792764	-0.257295	-1.10079	-2.34658	-0.0355777	5.08462	-3.01382	3.75884	4.04537	3.3354	3.86762	-1.38945	1.71246	3.377	3.37754	-1.34947	2.82738	-3.38174	-0.667703	1.92062	3.6358	-3.21039	0.883918	-2.62261	-0.760052
TNFAIP8L3	-0.565379	-1.03578	0.953854	0.0525411	-2.1766	-1.95858	2.96902	-2.04309	6.10522	2.54651	4.65895	2.26646	-1.79356	2.27612	3.64275	3.51841	3.8875	2.48847	1.47035	-0.420621	2.63431	2.1341	2.75779	-0.334629	-2.67447	-3.398
HEPACAM2	3.08585	4.93512	5.89766	4.01937	3.34454	5.17188	2.29272	0.556974	4.06164	2.54484	-3.25203	2.69594	6.34506	2.74168	-0.542717	-0.37636	5.84205	4.20482	6.01373	3.3369	6.07368	5.64329	6.59576	6.06814	4.37601	4.1793
CELSR1	1.88174	3.04399	-0.0514769	3.49926	2.87234	2.66831	-0.164189	4.52979	-1.02904	1.50871	-2.45957	3.12341	1.18965	2.02386	-4.69534	-4.6713	-1.68712	-1.88176	-2.69582	3.80334	-2.03654	-2.02317	-1.18838	1.54976	1.86314	-0.13632
AQP9	-0.292154	0.878192	2.50794	1.85785	-0.60643	-1.26349	2.59288	3.05043	3.07001	5.3518	-0.533562	1.4635	-0.966903	2.77313	-2.63936	-4.45698	-4.65638	1.30922	-3.21565	1.01034	-0.261104	1.55062	-4.42088	0.300545	-1.33567	2.87412
THBS2	1.53694	1.50207	4.83489	4.95779	2.16173	0.312433	7.31132	0.942909	4.18778	7.25542	6.34087	5.56454	1.05422	4.07603	-0.0959514	-2.16808	1.96988	3.45407	-2.86483	1.75146	2.45246	5.2101	1.02639	2.8252	-0.461867	1.36948
ITGB6	2.02425	2.88028	2.61946	2.32799	1.79046	2.74264	0.338133	2.22464	0.203665	3.1238	0.672851	2.43347	2.73058	1.44051	-5.73118	-5.55139	1.55318	-1.48274	3.05104	2.85125	2.23877	1.79946	2.26081	2.67371	1.95891	2.56401
SLC13A1	2.13175	0.527671	2.78578	1.94442	3.25296	1.13938	1.14128	1.11408	0.713625	3.47432	3.73418	-0.0787084	3.16057	1.91559	-4.98299	-4.8415	1.73908	0.480979	5.65556	2.4557	4.2436	1.52876	2.72995	3.32399	2.69128	3.17978
ACTA2	4.13868	3.57824	5.26422	2.66624	2.57128	1.49324	6.33717	0.687088	9.18011	7.35749	8.25358	5.5224	2.13346	7.92679	1.11137	0.0906773	7.48411	3.1237	2.80443	3.0082	6.42249	5.56367	4.62832	3.97934	1.94112	2.68936
ZSCAN18	1.23679	-0.609913	1.1931	-0.836643	-3.13334	-3.31764	3.22808	-2.59137	3.48993	2.54481	2.96207	0.924054	-3.67431	3.11168	3.50677	2.54795	2.97079	3.11403	-1.11287	-1.19067	1.30536	1.39753	0.832833	-0.721147	-4.58909	-2.79303
POSTN	-0.418394	1.9046	1.42493	1.43185	0.453417	1.29067	5.05104	-1.21489	4.91715	4.71555	6.34279	5.52428	-1.52969	5.56366	6.79742	5.86157	5.24931	2.91468	2.54815	0.422631	4.49496	4.67289	1.48128	1.45949	-0.861964	1.31448
ACTA1	-1.17215	0.360724	0.556493	-1.02172	-0.651913	-1.2362	0.00603226	-1.39634	5.69942	1.07038	0.774443	-0.834869	0.517024	6.53528	-2.0625	-1.98578	4.62997	-1.24106	-2.98738	-2.76925	2.74944	0.904873	0.898371	-0.147632	-2.03488	-0.355178
TPM1	3.09929	3.22939	4.25924	3.30695	2.72107	3.43744	5.62315	1.79135	10.6878	7.57915	7.23072	4.77031	3.09386	9.90876	4.48838	4.7584	9.12008	3.74362	3.44574	2.62392	5.90523	5.04435	5.26913	3.89978	2.76304	3.15868
MRVI1	0.70877	0.218843	1.02239	0.655334	-0.687976	-0.562853	3.50627	0.426522	6.51593	4.43029	4.43805	1.55429	-2.07883	5.67207	-1.58393	-1.32535	4.49258	1.39416	-0.383219	1.13534	2.14542	1.8631	1.20549	0.435127	-3.31568	-0.49493
ATP6V1C2	1.44455	0.434818	-2.2632	0.21697	-0.100397	4.80773	-2.88758	1.99568	-2.07761	-1.68901	-3.46206	3.78527	0.867232	-0.578685	-5.4059	-2.94354	-1.93322	-4.6187	-4.01188	0.0735598	-2.98463	-3.29775	-2.89017	-1.21034	0.040177	2.85731
CDO1	3.12428	-2.24242	1.82042	2.1417	-1.91088	2.07225	6.21889	2.37773	-0.0606726	2.07861	3.38948	3.90162	0.472706	2.46314	7.37456	7.15855	-0.559197	4.23976	-1.76828	-0.552641	1.18705	0.989728	0.12148	1.00995	-0.877603	-0.460967
SMPDL3A	5.54033	6.92048	6.76358	6.75652	5.62975	4.3066	6.33124	6.23987	7.71871	10.1764	6.00958	6.04603	6.54406	6.14697	4.10426	3.97166	0.658381	7.49633	-2.00099	6.74209	6.01024	7.48704	0.210763	5.43179	4.53103	4.28687
BMPER	-4.62932	-3.80701	-1.35335	-1.86264	-2.18488	-4.40256	2.90213	-3.32161	-0.514091	-0.649822	1.77281	-2.36576	-4.29653	0.840258	3.39616	2.63259	0.888663	-0.232874	-5.1563	-2.07848	-1.99858	-0.486196	-2.91607	-1.79687	-3.3291	-6.52263
OCLN	4.89553	5.36044	4.97504	5.51793	5.70262	5.18584	3.13005	5.48555	2.48227	4.8007	5.53631	5.29991	5.87463	4.02259	-4.70788	-2.47781	4.71534	3.28501	5.89602	5.55773	5.54309	4.77644	5.49139	5.61431	5.75162	5.35791
PROM1	5.11891	6.03418	4.85178	5.83198	4.18021	6.60811	1.28674	5.74752	3.42089	4.56783	2.94448	6.29722	5.47673	2.14172	-2.59809	-1.94078	5.73436	2.07088	6.90117	5.19068	5.80015	4.18006	6.46428	4.84369	5.24419	4.68625
CHL1	-0.0140013	-3.08949	1.41044	-1.80512	-5.155	-4.45373	0.0413411	-3.78809	2.3217	0.533603	-0.716097	-2.25785	-5.39944	2.01497	1.18899	0.994601	0.984334	0.0499235	-0.705352	-3.30562	0.695032	-0.512028	0.164979	-0.956627	-5.2454	-2.9762
WASF3	-2.02537	-3.45511	-0.943727	-3.02253	-5.22016	-3.04578	2.77947	-4.12337	2.19731	1.28605	1.63954	-0.0615742	-3.60265	1.54355	3.45051	2.68263	0.481661	0.523251	-2.5873	-3.13433	-0.471175	-0.594602	-0.544172	-1.54777	-4.76132	-3.87867
FRK	3.61487	4.73429	3.96695	4.3363	3.47668	4.10284	1.08899	4.0151	1.60515	3.56484	2.65942	3.40964	4.37263	3.1206	-3.78183	-4.69019	3.81142	0.826908	5.22958	4.71708	4.18641	3.10737	4.53376	3.92743	4.05751	5.0852
MYO5B	3.13222	4.59235	3.22212	3.88393	3.69077	3.60322	1.22263	5.02938	1.39576	3.64843	1.40812	4.71665	3.60351	2.62861	-3.67431	-5.11885	3.39277	1.03051	4.8972	4.97025	3.89902	2.11933	4.15892	3.18372	3.03708	3.06777
MFI2	0.642276	0.169874	0.0894032	2.41224	3.30334	0.169758	-1.62419	4.6848	-1.68612	-0.351599	-0.559031	1.91436	0.671058	2.53188	5.05732	3.738	-1.32452	-1.94171	-3.7273	3.18901	-2.48797	-2.57553	-1.74601	-1.01762	-3.22283	-3.90323
SLC4A4	5.41195	5.18866	4.88012	3.08627	0.637666	3.31812	3.13964	2.01372	3.85028	5.37316	5.06951	3.57239	4.18888	3.62601	-2.32724	-3.78285	6.23035	2.23943	7.49288	2.37234	6.14827	4.53371	7.06721	4.87106	4.69475	4.72697
ELOVL6	4.87361	5.02537	3.74391	4.71104	5.09195	1.89581	1.98369	6.32429	1.39881	3.18059	2.96403	4.32867	5.95191	1.82377	-4.38449	-4.3141	3.75261	1.75903	4.13944	3.94439	4.48924	3.05603	4.48001	4.29051	3.03069	3.27927
SCEL	1.51035	-2.10274	-0.0585871	3.42348	3.52982	1.15685	2.50802	2.91198	-0.996997	-1.05195	-0.828934	4.66644	-2.8353	-0.825678	3.02252	3.10103	-2.93749	2.46519	-3.19152	3.5409	-1.53901	0.0922616	-3.19736	2.42437	-0.115044	0.666338
APOA1	4.02239	0.11538	2.04756	1.22154	5.77799	-2.19837	4.6038	8.67911	1.1609	3.83931	2.15237	3.75193	4.37416	5.19437	1.54185	1.58758	6.7906	4.36841	0.601126	2.26958	1.69451	2.07465	0.196594	7.12718	-1.21467	2.77028
RBP4	8.0605	7.88767	2.49247	5.4053	6.26536	3.70623	9.48004	4.7971	4.38072	5.1223	5.53068	5.29923	6.8317	5.47464	8.90959	7.66834	1.66086	6.11848	0.391922	6.0516	3.90092	6.09688	2.33526	4.87814	5.70778	1.80094
CXCL10	4.00201	4.07542	6.0995	4.57423	2.06793	3.74002	2.77849	4.28012	6.18108	2.18006	4.83688	4.52854	1.80967	5.57323	0.626327	0.991376	-2.18739	7.13177	-0.455004	7.11547	4.10679	5.01595	-1.13623	3.77625	1.02028	4.69235
PDE3B	3.7612	2.89645	3.4435	-0.0154544	-0.234487	1.85082	4.3963	-0.445105	5.31885	4.75993	5.09801	1.67516	-1.95079	4.10993	-1.65939	-2.64714	5.25848	5.56587	0.801026	1.60859	1.69517	1.46503	2.82769	2.06378	-1.671	2.77387
ZCCHC24	1.0101	0.680963	0.898185	1.19446	-0.8335	-2.0095	4.22925	0.0851119	5.42528	3.8382	3.2733	1.83022	-2.36933	4.7423	5.68133	4.92667	3.62732	1.99533	-0.581275	0.987234	1.36963	2.29494	0.623005	0.466747	-2.66702	-1.74001
ADAMTS5	0.0347087	2.51097	2.1833	3.01599	0.747327	-1.78301	5.01439	2.0493	2.19478	4.41668	1.02403	1.98934	-1.45646	0.76912	6.01461	5.14526	-1.42408	0.778949	-4.21079	1.38748	-0.662424	1.80994	-3.01001	0.333836	-1.92323	-1.01001
CYP3A12	3.67679	-0.904875	2.01346	-2.57102	0.544288	-0.148839	0.558816	-0.568236	0.722055	0.222458	-1.38856	-0.873989	3.74192	-1.56221	-3.26723	-2.28022	3.35411	-0.790207	7.18738	3.482	4.65215	2.95392	2.47048	2.1676	-0.532011	0.713335
PDE6A	-0.0674988	0.712842	0.246201	-1.71548	-2.32443	0.128425	-2.06808	-3.11736	-0.94506	1.96762	1.62525	-4.24463	1.22313	0.274375	-5.28859	-6.12629	1.78118	-0.381547	2.02408	-1.9161	1.62365	1.22453	2.31765	1.0131	2.95956	2.27007
HSD11B2	4.90512	4.64804	5.25458	2.20339	2.70536	4.06593	2.67141	1.30692	4.64914	3.44951	3.27622	3.28643	5.71286	2.33417	1.03999	-1.71659	7.8652	2.9044	8.75384	4.69115	8.21973	5.42155	8.47657	4.12571	4.09723	4.69816
SERPINE1	1.50109	3.72699	6.38799	2.1889	2.30941	0.410287	7.70437	1.39316	5.25889	6.57545	4.1997	5.53307	0.635745	2.34861	4.20239	2.71501	2.32436	2.38573	-1.72568	0.435821	4.48554	5.03067	-2.66994	1.99899	-0.916306	3.85622
FAM189A2	0.0107655	2.99616	1.07818	-1.68743	-3.80581	0.48227	1.33556	-2.34258	3.63397	1.15434	1.40404	2.12316	-0.461144	2.95658	-2.20432	-4.72858	3.71143	-1.17229	-1.21959	-1.954	0.499843	-2.51768	1.88711	0.503654	-2.71868	-3.43928
LIMS2	2.01575	0.392779	2.56298	0.0182496	0.209641	0.174777	3.79949	0.948616	7.06221	4.88437	5.23926	1.52902	-1.03234	6.02279	3.03436	2.1106	6.1309	2.88994	0.153351	0.0560979	3.47449	2.92001	2.46611	0.984546	-0.983469	-1.56317
PPBP	-1.46376	0.407472	1.09968	0.22944	1.07505	0.0395174	3.06399	-1.08786	-0.0363764	-1.05366	-3.19842	-3.57243	-1.00847	-3.75369	-3.39582	-2.85987	0.140543	-3.20655	-3.48135	-0.163598	-0.592708	2.0826	-4.6674	1.87822	-2.93545	3.10565
CACNA1G	-2.98761	-3.70254	-6.32642	-5.00924	-5.2458	-3.23308	-0.00537394	-4.79242	-2.78822	-3.72332	-0.449889	-2.06052	-2.57888	-1.99394	1.48993	0.133406	0.0566113	-1.24	1.47989	-3.01329	1.6771	-3.77912	0.615153	-4.90137	-4.49658	-5.15866
HPN	5.4622	5.75398	6.06365	6.18584	6.066	6.12521	3.28501	6.7795	2.97638	4.6211	2.31174	5.16404	6.03463	4.90564	-2.93332	-2.59012	5.06791	2.81875	5.34139	6.35575	4.99869	4.13295	5.70007	5.71689	5.64385	4.73376
SDPR	0.104068	0.753391	2.73147	-0.379374	-1.66803	-3.44691	4.58458	-3.47218	5.64161	3.356	3.65236	2.07392	-1.61738	4.14731	4.43934	3.68933	3.86162	2.90932	0.888367	-0.548179	2.74415	1.94442	2.6189	1.67754	0.176999	0.679
CPNE7	-2.41438	-2.50488	-1.11083	-2.39528	-2.88945	-0.896117	-1.8214	-2.70425	-2.21415	-0.378204	-1.31074	0.745822	-3.40998	-1.43434	4.80665	5.12713	-5.1775	-1.37422	-2.5972	-2.37877	-5.71453	-4.12573	-2.76633	-0.270337	-3.02775	1.02465
B4GALNT3	2.47438	3.50112	2.85823	3.04505	2.18425	2.78258	0.532776	3.41472	1.27807	3.02173	1.09493	3.16895	2.59652	0.0738888	-5.06304	-5.98271	3.72938	1.3684	3.85187	2.85328	3.70634	1.90758	4.54562	2.2907	2.92854	1.08176
HLF	-2.32365	-3.93196	-3.0704	-5.84056	-2.43747	-5.51903	-1.202	-3.8031	2.96166	-0.143373	-0.346435	-1.77925	-5.41621	-0.136027	1.04729	-0.147979	2.09605	-0.437617	-2.98138	-3.12795	-1.60099	-2.19354	0.118479	-3.68593	-3.66921	-5.05927
SERPINB13	2.2347	2.38277	5.1101	5.60646	3.64803	4.50069	1.92238	4.55502	-0.100071	2.93541	-0.040764	-2.39199	0.459463	2.06963	4.70623	4.48658	0.498363	0.308955	2.48545	4.38924	3.03162	3.99851	0.977742	3.69349	-0.449413	5.94446
ABCC9	-0.299883	0.987612	1.23159	-0.30919	-1.1812	-1.29145	4.0815	-2.79037	5.49015	4.85645	3.52463	0.931917	-3.46938	4.12989	0.179154	-1.29344	2.10248	1.8679	-1.97548	-1.25474	1.95606	2.27019	0.0671706	0.543219	-2.40542	-1.16364
CHP2	4.67868	5.7149	5.64668	4.08593	4.75592	5.00216	3.66989	3.83858	4.68989	4.4199	5.64704	3.41908	5.69419	4.24267	-1.86896	-2.04259	7.59164	3.73286	7.97257	4.0131	7.92288	6.26429	8.11441	5.59443	5.97216	5.18303
DNAH11	-4.0145	-8.03726	-2.52973	-5.21346	-6.6393	-5.45406	-3.29493	-2.78331	-2.30694	-5.50371	-5.50027	-2.11644	-4.723	-5.68663	-1.28805	-0.757418	-0.584183	-4.17141	0.632482	-3.65099	-0.00377036	-1.7155	0.055862	-5.67678	-6.75995	-6.17746
CDON	0.28655	-1.24857	-0.0445726	-1.27412	-1.70141	-0.0418478	5.32699	-3.4932	3.38751	2.32956	1.95829	0.0255817	-1.41361	2.69553	4.86135	3.59276	2.32217	3.09251	1.92901	-0.602736	0.199072	1.15298	0.8995	-0.974172	-3.59398	-2.26097
HES6	6.03432	6.25293	5.22546	6.77541	6.20225	6.71132	1.03808	7.05538	1.83735	4.48292	4.37246	4.24863	7.80303	3.2947	0.136178	-2.35085	3.19865	0.791256	3.17131	7.18146	3.07755	3.1016	3.88137	5.00868	6.96113	5.04697
PHLDA1	3.85069	5.60755	6.08551	6.50101	5.41096	3.38024	4.98681	6.71932	3.35485	5.89709	2.32605	4.95907	4.77969	3.25294	0.642988	0.0819395	-0.0142169	2.63823	0.367617	6.40515	2.38807	3.16639	-3.03932	3.26472	2.94244	6.02745
MOGAT3	3.88552	4.13475	4.64699	3.71593	3.37288	2.317	2.33195	0.866251	2.84627	1.75232	3.82584	1.01978	4.29368	3.01452	-2.30729	-4.53633	5.88823	1.31129	6.55611	3.44667	6.60812	4.16785	6.45397	2.90477	4.32442	3.87944
F2RL1	3.23179	3.7493	4.02796	4.85122	3.46021	2.88744	-0.556595	4.31322	1.10179	2.84356	1.26539	3.51799	4.15665	2.00777	-2.41642	-2.60511	3.54332	0.932636	5.76684	4.57402	4.61716	3.11398	4.35154	3.40632	3.21938	4.91174
MS4A7	1.84883	2.92965	2.89546	3.8738	2.55165	2.70251	5.01088	2.17238	4.66596	5.35895	4.21098	2.86878	1.21845	2.28078	1.65678	3.20349	-1.91553	2.2638	-3.91558	3.61172	2.44091	4.10207	-5.09771	2.95354	2.21928	2.00202
DMPK	1.96639	0.980106	1.19503	1.7609	1.80871	1.88089	1.84919	0.872852	6.11863	3.52403	4.28859	0.146929	2.81927	6.149	5.69934	4.54067	6.31634	-0.455732	-0.872142	3.12068	2.52014	0.984837	1.99631	-0.0233827	-1.30272	-1.25014
PPP1R14A	0.528431	0.85919	2.97149	0.330145	2.53772	0.436268	2.99046	0.483261	7.62745	4.70352	5.62789	2.78597	0.611021	6.70223	2.98536	3.59124	7.06196	4.36566	0.703145	1.4289	4.17162	3.86443	3.66858	1.73695	0.786479	-1.21731
FLNA	4.38263	3.95129	5.24532	4.30696	3.71487	2.31486	6.26204	5.41377	10.1677	7.7621	8.15906	5.61871	2.85997	9.21949	7.66952	6.05939	9.05215	4.71681	2.69112	3.60617	5.89851	4.94902	5.64685	3.5929	0.95334	2.61298
PLEKHA7	1.75692	3.68083	2.64817	3.05218	1.95563	3.45269	2.35162	1.52322	2.05992	3.43315	3.26951	3.16961	3.00059	2.64862	-4.7506	-6.24391	3.9617	0.963067	4.30729	2.48848	4.00319	2.20365	4.68623	2.43547	2.50903	2.76419
MSX1	5.222	4.51946	4.05631	6.01538	6.17454	6.54841	3.42331	7.28585	3.06265	5.15017	1.07504	3.1562	5.75746	3.97953	2.18628	0.805499	0.873207	0.913309	-0.684552	6.29646	2.35235	2.4777	-1.74766	5.55933	7.03374	5.8356
SEC14L4	1.46814	-2.72599	-2.03626	0.347666	-0.853037	0.709291	-2.42588	3.7131	-2.1367	-0.419963	-0.986865	2.79833	-1.47895	-2.14922	-5.79699	-5.69188	-3.07519	-3.98889	-5.53238	0.543971	-3.10899	-3.38978	-5.61804	-1.08219	-3.27966	-0.662383
HOXA13	3.41298	1.22596	3.48081	1.82212	2.37399	3.55536	-0.524797	4.07909	4.40763	3.30712	3.90914	3.92239	3.35243	1.8518	-2.76886	-2.58348	4.66431	1.21872	5.5259	3.09051	5.39371	3.32526	5.2959	2.26582	3.58561	1.74426
SH3YL1	4.601	4.26737	4.53603	3.29941	4.82402	4.49678	1.25459	4.76688	1.55677	3.77012	2.49742	5.25698	5.26473	3.70711	-2.61662	-4.05521	4.35928	2.21688	5.03446	4.31733	4.87277	3.67898	4.94658	4.62723	4.80059	4.50497
LEF1	3.53527	3.83616	1.90922	2.6211	3.14142	0.474317	2.05938	4.19992	-0.490665	1.25661	0.800687	4.42237	3.86609	1.22982	-3.02753	-4.83329	-1.02604	4.14932	-2.66606	2.81664	0.0122397	0.443331	-0.973231	1.84807	2.00888	2.86898
VCAM1	4.18057	0.553862	4.25484	1.97552	-0.197699	-0.0229663	4.90398	1.25677	1.00976	4.54047	3.70478	2.23633	0.591957	1.56058	3.61187	3.32349	0.129626	5.98583	-5.36308	0.0644552	3.15244	4.1075	-0.493741	2.22643	-2.03885	-0.177717
SNTA1	-0.676501	-0.303301	0.742808	-0.895889	-0.390648	-1.56918	3.6958	-0.670171	5.75922	2.91003	3.67411	0.227864	0.0752177	5.01365	1.21185	0.725802	5.74852	1.11482	-0.328187	-1.12169	2.4645	1.20526	0.892306	0.598927	-0.638589	-2.14733
FRZB	4.61136	6.52166	4.70893	4.96064	4.28365	7.04212	5.3102	5.28304	6.25747	5.89079	2.7593	6.47779	5.89959	5.97336	-2.2547	-2.11445	6.07888	2.57192	0.879471	6.21801	3.50076	2.10148	2.53497	5.26234	4.16353	4.6548
BTNL2	1.6121	2.65236	2.40179	-0.342706	-0.0121931	2.31299	2.22069	-3.00189	1.342	2.42523	3.87233	0.289504	1.95329	2.48247	-5.11583	-3.37674	3.4575	3.16373	4.77159	0.356189	3.24624	2.44972	4.14865	3.53	3.68384	2.62248
ABCB1	1.79209	-1.06778	-0.994672	-1.24412	-0.799312	-1.4447	0.0167958	1.81911	-1.28197	1.88815	-0.680657	0.56004	2.52134	0.109869	-2.65958	-4.55761	4.06128	1.58899	6.1133	0.142047	4.4999	3.21597	4.81581	0.535963	-0.328527	-0.859279
FAM13C	-1.75268	-5.32793	-0.960429	-3.50381	-5.48385	-3.3247	1.12781	-6.4362	1.32426	0.564066	1.12971	-1.95799	-4.63316	0.916622	-0.601067	-1.16574	0.382512	-0.698623	-1.21215	-4.90088	-0.468988	-1.4935	-0.418253	-2.2193	-5.06372	-5.45183
RPL19	6.98796	6.49216	5.37796	7.80808	8.28058	6.10263	1.21187	6.17732	1.8724	1.41815	6.80534	7.08437	6.8429	4.93509	6.99277	9.41099	5.41143	8.91225	-0.977659	2.89947	5.63112	6.34722	6.24117	6.86163	6.72212	7.15996
CD79A	6.97207	4.66416	5.90374	2.41164	3.16488	0.60066	3.80056	1.98254	2.56455	2.01516	3.84809	-0.396194	1.3707	0.235507	0.00983444	-1.70213	1.3509	7.58363	-0.129243	2.94268	4.75158	6.0883	2.04079	2.87675	0.656579	2.59956
SYT9	0.996562	-1.22393	-2.03755	-1.32387	0.46778	-6.58341	-0.309181	1.18689	1.2005	-0.807233	0.930442	-0.559854	1.9732	-0.0794231	-1.9179	-3.81694	-0.328366	-2.7348	-5.42807	1.73181	-1.84384	-0.948856	-2.33509	-2.54057	-2.60253	-5.7621
AQP5	5.79166	7.67457	4.90702	6.07054	3.91337	5.67787	-0.266368	6.27029	1.20499	4.76376	4.33783	7.41385	6.25063	3.46894	3.50416	2.57459	1.29314	-0.383108	-0.164317	6.50585	1.32489	1.94417	1.30863	4.37451	5.22369	3.42381
PRKG1	-0.651514	0.0726272	0.939633	-0.0624191	-1.57073	-2.01191	2.18248	-1.76793	5.3187	3.78322	3.69035	-0.17037	-2.09355	4.52445	2.58232	1.03526	4.05225	-0.214516	-0.850533	-1.48801	1.8314	0.873089	0.831869	-0.404943	-2.6905	-1.65264
ROBO3	-1.99588	-2.13515	-1.16542	-1.0602	-3.07771	-4.42439	0.127369	-3.39436	3.40519	1.68476	1.24202	-1.90796	-3.7698	2.53865	-3.92755	-4.20977	1.93587	-2.32208	-5.08519	-1.93992	-1.35698	-3.13268	-1.85589	-2.4538	-4.6744	-2.82353
NIPAL2	3.09278	4.3923	4.48886	4.00318	4.05986	3.4266	1.45682	4.21458	1.75116	3.44944	2.89598	3.97115	4.33029	2.59281	-2.65162	-5.56203	3.66043	2.54321	4.51763	4.20424	4.53076	3.33581	4.14473	4.52545	3.88809	3.38488
MYO1A	3.99815	5.09806	5.07243	3.82554	4.38812	3.93308	2.33049	0.724589	3.43937	3.18828	4.15335	3.08611	5.20728	3.44427	-2.48789	-1.7074	6.82135	3.04907	7.78184	4.18525	7.57823	4.80896	7.41686	4.52165	5.37178	5.43082
TMTC1	-1.16108	-0.675109	0.520508	-2.62775	-2.54766	-2.91798	2.9742	-4.56259	2.23609	1.4432	2.51193	0.92751	-3.73992	1.77324	4.51542	3.42426	0.93253	0.714276	-0.951262	-1.1343	0.720699	0.34898	-0.113915	-0.988232	-5.21043	-1.30775
PI3	10.4456	11.575	9.12509	7.7417	9.99417	8.35283	8.28477	7.14845	6.22235	6.74085	5.369	10.4653	10.6366	8.66228	10.5041	11.2003	5.23426	7.81343	5.44864	9.7284	7.32902	7.08764	5.7304	8.63807	11.283	5.69129
HSD11B1	2.19678	-0.12293	3.11517	2.27753	1.14949	0.397157	4.93603	-1.99333	2.15799	5.13461	2.58703	1.95372	-3.53006	2.05022	6.15513	8.20399	0.56349	4.01508	0.788377	0.606224	2.22933	2.93922	0.0619697	2.26074	-0.474065	0.906005
FOSL1	0.885067	4.13745	4.00577	4.0505	1.41125	2.71466	3.12142	3.53485	1.59575	3.68714	-2.14717	1.81426	1.31541	-0.0337349	1.00631	-0.868708	-3.60306	-3.54827	1.78314	3.56239	1.46504	1.96639	-3.317	0.829923	1.54013	4.85035
TNFRSF19	2.13883	1.63039	1.27212	3.64893	3.20845	2.7372	-2.24672	3.24684	-1.21337	-1.6506	-3.46903	3.67593	3.56417	0.532955	-2.40281	-4.27623	-1.058	-1.67952	-3.05698	3.27525	0.35373	-0.259476	-1.32449	0.517417	-1.29472	1.04059
PIPOX	4.39799	4.40125	3.34189	4.15567	5.07998	3.83082	1.54037	-0.340457	1.64064	2.47406	1.75761	3.78373	4.80487	0.745926	-3.97701	-4.87958	1.79429	1.51952	3.12197	4.84932	2.86065	1.87094	1.91763	4.4941	3.13437	3.8367
LGALS2	8.3534	8.25603	8.88572	7.53307	8.55028	8.26304	7.03112	6.40861	7.00955	7.42013	6.94086	7.45515	9.93407	7.71447	0.126259	2.09071	9.7203	8.17869	10.6951	7.83784	10.4037	9.1467	10.4765	9.41446	10.0173	9.88868
PRIMA1	-2.12423	-2.02855	-0.446986	-5.8786	-3.87663	-3.08317	-3.50752	-5.6721	1.77615	-0.00741862	-1.13986	-4.58555	-3.88805	1.80761	-2.73403	-5.78838	1.68783	-5.90789	-0.802416	-1.38841	-0.722782	-2.71361	-0.354721	-2.26878	-2.54685	-3.33982
FBLN2	0.914702	0.745091	3.52012	1.74373	-0.0377738	-0.891324	6.63898	-0.329102	2.99081	4.64922	5.04306	4.9232	-0.71706	3.8808	6.89234	4.74668	1.94054	3.30854	-0.115422	0.451372	2.62886	3.45468	1.3791	2.21984	-2.89633	-0.088221
MMP9	0.546848	1.63211	2.96788	1.82068	2.57215	-2.2289	0.0938846	2.37693	1.0321	7.26244	1.25006	3.85545	4.03547	3.19439	-0.68403	-1.89803	-1.23206	4.60794	-1.96481	0.98887	2.41779	3.89033	-0.875571	1.97355	2.38688	0.92117
CD180	2.65474	0.366767	1.8297	0.206243	-1.02416	-0.637722	4.36003	-1.867	2.92473	2.69996	1.61599	1.16265	-3.39407	1.0697	0.949654	0.475355	-2.98635	3.97506	-3.91741	0.392856	0.994971	2.17486	-5.0659	-0.891632	-2.82878	-1.44659
ALPL	2.97383	4.8452	2.38764	-1.58669	-1.70128	3.55618	-0.884868	-0.796849	-2.87685	1.08925	-1.64282	4.31804	2.03388	0.359544	-3.82591	-4.16046	-1.12859	-0.474432	-1.25324	0.0601719	-0.681078	-1.81067	-0.299482	0.838774	3.20086	0.815797
ZNF521	-1.55486	-2.15884	-1.03594	-2.0912	-2.68092	-3.1552	2.52332	-3.39999	1.4488	1.42871	1.78843	0.135561	-4.31857	2.22498	4.07679	2.65862	0.275687	0.606129	-1.1946	-2.4036	0.0567777	0.130193	-0.652396	-1.61576	-3.85917	-5.66543
JCHAIN	7.63608	8.92634	9.73729	8.5371	9.86163	7.20734	6.07894	6.09291	8.29501	6.69907	9.32173	5.1355	6.73063	4.14156	4.23949	3.85859	6.70087	11.3805	5.71759	8.81562	9.79834	13.7829	6.13512	8.86023	7.49343	8.40006
ANXA13	4.57338	4.83991	5.83657	5.10316	4.89845	3.88604	-0.77183	-0.602764	3.16524	4.02326	4.64697	4.5689	5.59665	1.54672	-2.50013	-0.959526	4.88453	3.7023	4.7092	3.23085	5.31031	4.94082	5.32193	6.45769	5.29517	5.13428
GJB2	4.3788	4.48827	3.32911	4.83981	4.22038	2.66213	1.33826	4.73308	3.14404	3.0336	2.52884	3.36311	5.09433	4.35619	-0.189213	-2.27546	6.15124	1.09135	8.16448	5.00563	7.38138	3.68422	6.85523	4.79459	4.21931	3.10899
AKAP6	-2.5839	-4.0309	-1.62325	-4.95999	-4.58205	-5.61218	-1.58292	-6.29983	2.09991	0.2195	-0.441995	-4.5364	-4.44897	1.17198	-3.19342	-4.25499	0.763335	-3.02766	-3.39428	-5.27464	-3.02463	-2.67951	-2.24176	-3.98057	-5.33519	-4.20942
ARL14	1.02826	0.467739	1.94326	1.43335	1.31242	1.40871	-1.22258	-1.0861	-0.391774	0.389721	-3.60414	-0.128454	1.13483	0.0442682	-3.78897	-3.61492	2.48999	1.18955	5.40196	1.91148	3.83054	4.03467	3.45914	2.94169	1.28134	3.44612
AQP3	6.98867	5.5285	3.17689	6.42315	6.81734	5.54852	2.34777	7.65992	1.39836	3.50611	0.591928	6.19876	5.71386	3.60164	-0.207558	-0.340077	1.75537	1.73471	1.68674	6.73497	3.46371	3.65057	1.81423	3.89103	3.29934	3.9818
SELL	3.4986	1.27782	2.95545	2.03996	0.370064	-0.665658	3.58071	0.692972	3.60974	3.60527	1.78065	1.50678	0.0785142	3.18597	-1.24048	-0.965615	-0.554638	6.05762	-5.11074	1.67834	1.7231	3.25374	-3.71426	1.77231	-0.863171	2.58505
FAM222A	4.78752	4.98743	3.76055	5.02374	4.49558	3.57264	-0.816759	6.10327	0.853445	1.64077	1.38201	3.33623	4.71683	3.00265	-0.276931	-3.4159	0.742394	-0.286691	1.19978	6.04978	-0.185374	-0.351546	1.17076	3.83331	3.83612	2.92514
MGAM	-2.9112	-1.6061	-0.663995	-1.88229	-4.45029	-4.56481	-0.211548	-3.80488	-1.8912	2.20363	1.30784	-3.46907	1.34534	0.0246176	-3.79571	-4.08838	-0.338329	-0.645555	3.55986	-2.04675	3.42773	1.3897	-0.114922	-0.94633	-3.07005	-0.269357
ETV4	4.05061	5.45056	4.26411	4.98021	5.22204	3.79665	-0.252143	5.46016	0.424148	4.876	1.78756	3.9002	5.14736	3.46264	-1.02676	-1.09378	-0.336238	0.271724	0.268159	5.59228	1.8312	2.14277	0.556022	3.85966	4.74034	3.70022
HCN2	-1.47418	-1.90352	-1.69218	-4.96695	-3.98142	-4.70862	-0.496631	-3.16327	-0.487947	-1.28066	-0.225359	-1.90405	-3.47538	-0.370128	4.17822	3.09463	0.194881	-2.7619	0.21826	-1.44152	-2.04353	-2.15941	-0.15233	-4.59919	-4.38484	-5.02581
LTB	5.4877	-0.533416	3.9473	-0.385641	0.350192	-0.386063	3.57939	-0.36109	1.15361	1.55606	1.7792	-1.38263	-0.261198	0.350237	-2.39975	-2.36036	-0.641878	7.04427	0.242304	1.70518	2.89748	3.05446	-0.0325303	1.76177	0.591976	-0.204933
CHGA	4.34162	4.01895	6.10971	1.56351	2.72806	7.61664	1.60268	3.23026	1.90388	2.19761	0.599813	4.5175	10.6172	7.2304	6.02812	4.04743	6.73784	4.1384	4.33603	2.45449	6.80992	5.10768	7.14163	5.94486	7.48735	3.13722
CCR6	3.50199	0.688744	2.92861	0.80096	1.23243	1.40389	2.20408	0.702985	1.56862	0.480668	1.28921	-0.217043	1.84849	-1.16332	-4.27567	-3.14782	4.05527	4.44677	4.32804	1.96865	4.6306	2.80729	4.61757	1.38892	0.250028	0.922746
DSP	4.23775	4.96976	4.16674	5.21483	4.4886	4.52347	2.07799	5.83712	2.21256	4.65586	2.02008	5.22099	4.75202	4.13312	-2.54619	-2.94103	4.94983	1.83535	5.7331	4.95759	4.88164	3.84603	5.76778	4.27142	4.3782	3.72457
ANPEP	1.48245	4.07954	1.55408	1.33328	1.87705	0.196859	4.91896	1.35605	2.402	4.55219	2.06079	1.91833	6.32512	3.98977	-0.953447	-1.23862	4.74181	3.64756	7.99119	2.58427	6.52901	1.73736	4.59432	7.05413	4.74349	5.22834
SPTBN2	1.80081	0.786504	0.14599	2.82881	2.05618	1.5201	-3.45773	3.39229	-2.67394	-2.00303	-1.30991	1.62075	0.869374	0.302664	-2.10879	-3.55876	-1.51811	-5.69093	-1.46388	3.31865	-2.87301	-1.02803	-1.38649	1.34955	-0.758248	1.18713
MMP12	3.92612	5.92202	4.95742	6.15596	5.26844	5.33243	3.7433	4.12474	2.09528	6.85217	4.35239	5.5104	4.4726	6.45803	0.898263	1.16403	-0.453704	6.32694	-0.0216125	5.31495	5.1281	7.16863	-0.580746	5.20821	5.0571	3.90742
PCOLCE2	1.34997	-1.55768	1.96715	-0.494085	0.570871	1.37832	4.26926	-1.3806	2.67524	1.59676	1.94675	2.1798	-2.49951	2.58707	5.01544	5.75691	1.37143	2.45831	-1.33463	-0.858536	1.91052	1.44581	0.624466	1.67381	-3.83446	-3.38522
CXCL12	6.173	2.49727	5.80454	2.07527	1.48571	2.25789	7.55162	1.26702	6.84916	5.13134	5.7115	4.9253	1.59864	5.30838	9.07927	7.97398	5.29782	7.60139	2.50144	1.62614	5.35643	4.20625	5.54471	3.74992	0.598394	1.6574
PRPH	2.91274	0.0892676	3.51158	-1.30827	-1.37667	-2.42965	2.13248	-2.42063	1.78125	2.07755	1.03219	-0.141156	-1.57744	3.32651	7.00066	5.64732	1.67501	1.36838	-1.50235	-2.68067	1.99462	2.37686	1.65694	1.62065	1.45411	1.5696
FHDC1	2.62583	3.65155	2.61868	4.38427	3.18629	3.84268	-0.395485	4.25074	1.92874	2.78408	0.661248	3.23708	3.08428	2.16581	-3.12671	-6.31038	1.8581	-0.513275	2.91787	4.56065	1.8846	0.869619	1.64586	3.07382	2.56924	4.19897
CLIC3	1.74263	-0.784846	0.135377	1.51329	2.04109	0.430799	-5.85028	2.28257	-3.43317	-1.98742	-1.56	1.75143	0.896528	-3.49099	3.93409	3.79732	-2.34783	-2.49859	-0.242386	1.41329	1.37453	0.144112	-1.67609	-0.75013	-2.51165	-2.03495
MDGA1	-1.02103	-2.41093	-1.03709	-4.63939	-2.54675	-5.46139	-0.317421	-4.44167	-2.10199	-1.0983	1.69081	1.04518	-2.04879	-0.485766	2.88162	1.62031	0.93194	-1.58451	4.29652	-0.0965699	1.96908	-0.163572	1.30005	-1.64577	-3.10855	-2.94207
FOXP2	-1.47433	-1.1463	-1.04432	0.0788011	-0.773718	-3.12353	-1.4833	-0.382837	3.39972	0.755836	1.73537	-1.72568	-2.19683	1.99305	-5.34486	-6.72465	1.75167	-3.83265	-2.6862	0.354136	-0.962042	-2.02696	-1.11119	-0.92734	-2.84254	-2.67855
SCG3	0.631207	-1.28883	1.2997	-1.99451	-4.22755	1.75185	1.14463	-4.19247	1.69425	2.12086	0.468927	-0.880912	1.79254	1.6059	6.00874	5.43612	0.814591	1.40412	-0.842491	-2.02178	0.577528	0.658225	0.753142	0.0900675	-1.10202	-2.65809
WNT11	3.52621	2.90585	0.455355	3.27507	3.98889	3.59069	1.96057	5.54701	-1.21077	2.05108	0.722195	3.69478	3.21199	2.32339	-1.22243	-3.67034	-0.518747	-1.44274	-2.52645	3.78903	-0.992578	-1.06821	0.319641	1.56713	0.446817	1.06149
C8orf4	8.10886	6.54967	6.24594	9.53471	8.70891	8.34359	6.02164	8.88787	4.77867	6.68024	5.26415	6.9748	6.37932	8.17363	0.789529	1.23796	4.78214	4.18954	2.41184	9.3202	5.07648	6.44795	3.1497	6.80116	7.88946	5.76944
DNAJB5	-1.83065	-1.96977	-1.58946	-3.04827	-2.44167	-1.61675	-0.932482	-2.83264	2.94462	0.000894194	2.09684	-2.56463	-0.67355	2.97453	1.2943	1.03503	4.13741	-1.26824	-0.979026	-2.5767	0.378478	-1.02695	-0.00403653	-2.70492	-4.47171	-1.57614
GALNT6	3.88898	5.54266	5.93961	4.81786	3.26184	4.83066	3.14549	5.18595	3.05561	5.10983	2.65305	3.96416	5.21157	3.9387	-2.04696	-3.31308	4.74167	3.41419	5.98804	5.54073	5.35839	4.07374	5.48629	4.39605	4.27609	5.35871
USH1C	4.68629	5.6628	4.82225	4.69179	5.19196	4.36882	2.07746	4.34949	2.14863	4.17794	4.24728	3.75478	5.79434	3.59584	-0.540237	-3.45934	5.6784	2.29528	6.36938	5.25528	6.37038	3.9938	6.52552	5.0436	5.47108	5.06826
AOC3	-0.797902	-0.309376	0.520679	-0.340486	-2.63337	-2.17256	3.37171	-3.40536	3.35849	2.68565	2.89844	-0.824566	-2.78144	2.82141	0.11206	-5.14023	2.38503	-1.0909	-3.0702	-1.13807	0.292499	-0.0788714	0.24947	-0.891584	-2.66825	-1.0278
MUC13	9.05962	9.7029	8.47464	9.01506	8.46807	8.79221	3.86985	9.02896	5.36343	7.0478	6.12069	8.57994	9.01547	7.87792	2.12138	2.68909	8.62035	5.29314	9.36249	9.17948	8.88528	7.59474	9.16332	8.73145	9.31248	8.50283
C3	4.09639	1.39639	5.48931	2.96557	0.519894	2.0244	8.81126	0.223151	4.27095	3.76273	1.64178	3.9807	-0.660931	4.60994	1.98786	0.766722	1.62828	5.08255	-1.32134	3.80718	4.13906	5.0168	2.50822	2.89857	-1.50806	0.280422
PCDH7	0.325904	0.794778	1.70872	0.535406	-2.07694	-1.29409	3.31357	-0.37931	3.525	2.30149	2.79383	0.913447	-2.66455	2.73461	-4.72917	-4.10988	3.28871	0.439772	-1.15013	0.236707	1.82848	2.06096	0.349648	-0.0288711	-2.43846	-1.95201
KIAA1462	-0.421293	-1.00639	0.585222	-0.678217	-2.01133	-2.05937	3.06899	0.456417	5.37977	3.15296	3.3305	0.490385	-3.81778	3.07123	1.22602	0.352702	2.72547	0.436567	-0.600989	-1.32068	0.809612	0.180415	1.0718	-0.528983	-3.15038	-2.51764
ALDH1A1	4.1414	3.88095	5.55276	4.95179	2.19764	3.56956	5.17411	2.36826	2.90276	7.26971	4.94416	3.43763	5.13583	6.21954	-2.7929	-2.08149	5.9168	5.60844	5.55303	3.29999	6.6134	5.54641	5.51242	6.66458	5.66446	3.87045
EBF1	1.37256	0.14883	1.85846	-0.801931	-2.56832	-2.03867	3.58595	-2.96135	0.71707	1.46929	2.72369	1.46779	-2.39229	1.4176	6.1474	4.9948	0.468813	3.01088	-0.736292	-2.11605	1.17957	1.41545	-0.495451	0.155244	-2.60239	-1.93922
PCLO	-5.19617	-5.02342	-4.53586	-6.49761	-8.66626	-4.78073	-6.18915	-6.25783	-0.770917	-3.95773	-2.13279	-4.2318	-4.74666	-2.14318	-1.36231	-1.22462	-1.84313	-4.82404	-5.71052	-5.58189	-6.30889	-8.27422	-4.45517	-3.52811	-5.19993	-7.66852
FAM83E	1.55782	2.43503	3.02404	1.39434	0.52697	2.34419	-4.19258	-0.587674	0.871457	-0.128109	-1.0429	1.22679	3.26644	-0.591471	-3.22721	-4.22028	3.06335	-2.01486	3.95142	2.07572	3.19045	2.59859	3.67683	1.65307	2.15903	0.650029
TKTL1	1.49123	-0.138342	-0.974642	0.948646	2.91687	-2.3117	2.50524	0.322355	1.64148	1.11307	-0.0414928	0.974617	-0.516729	2.41557	-3.72776	-5.59718	-0.68065	-1.10918	-2.36707	2.13365	1.50438	1.50213	-3.19965	-3.11113	-2.60589	-3.0971
MPDZ	-0.371228	-1.10156	0.404642	-0.628715	-0.541547	-2.04499	3.73876	-0.205319	4.2568	2.85893	2.89225	0.8629	-3.31072	3.71525	2.47719	1.40588	3.11306	0.877391	-2.06819	-0.963886	0.0559592	0.936093	-0.143269	-0.814973	-2.90792	-3.56444
CD72	4.09198	-0.735519	2.64584	0.245277	-2.70546	-1.07613	1.82581	-3.10384	2.35648	1.20709	1.36649	-0.421154	-1.54635	0.152209	0.0603933	1.08245	-1.36955	5.81062	-2.92587	-0.959756	1.48253	2.1298	-3.13823	0.739762	-3.77897	-1.96059
LRMP	5.71439	0.806918	3.46719	0.758371	0.629949	-1.43872	2.90898	-1.08395	2.39081	1.36844	2.14411	-0.0780702	-2.16466	0.445494	-0.272019	0.683598	-1.3574	6.17683	-1.22114	1.54069	0.542991	3.78175	-2.52013	1.17366	-2.63469	-0.514689
SERINC2	5.58434	5.77021	5.18648	5.98657	5.55487	5.53516	2.13528	6.56053	3.0398	5.19609	1.15459	6.29845	6.11247	3.71637	0.559658	-1.37586	5.32946	0.684334	6.47032	6.41544	5.82125	3.25523	5.97339	5.17097	5.19744	4.50473
LIPH	2.7127	1.67277	3.11953	3.30033	3.76384	2.42211	0.862424	1.97	2.18015	3.05688	1.31273	2.7794	3.84677	1.82233	-2.79429	-3.52275	4.8282	1.34219	6.01983	3.22735	5.36294	3.65578	5.69291	3.81833	2.68295	3.51168
SERPINE2	5.03988	3.57118	7.04507	5.19875	4.17068	1.29744	8.13742	5.20317	6.87743	8.59058	6.4683	5.46804	2.90983	5.9377	6.72129	5.07934	2.99808	5.52048	-0.526467	2.79047	6.69991	5.97562	1.41771	4.86053	0.191929	2.72462
MYRIP	1.48806	2.63559	1.81464	0.622958	1.27869	2.03611	-0.289104	2.13949	0.314615	0.629697	0.953489	1.80295	2.63954	2.09557	-6.04417	-6.87715	1.79178	-1.62219	1.51874	1.22966	1.45831	0.506714	1.9444	2.30874	2.55574	2.21678
SERPINB10	-0.662049	-1.41641	1.54625	-0.07578	-1.3837	-4.3126	4.21351	-1.71082	2.73906	2.42612	-0.263615	-0.930886	-0.503464	0.555571	5.43264	5.01891	0.866243	1.7075	2.18275	-2.08521	2.07738	0.608421	1.4408	0.633682	0.682807	1.36449
TNXB	-1.26142	-1.96158	1.3839	-1.94519	-2.71876	-3.54369	3.38743	-0.783171	1.46959	0.765535	0.185207	0.741143	-3.12112	1.86406	5.0337	4.887	1.31271	0.495818	-1.38348	-1.42714	0.627495	0.542724	1.19075	-0.0108058	-4.20591	-1.34897
MRGPRF	0.962638	0.161952	1.97286	1.33495	-1.82577	-0.695234	3.82167	-0.0748239	5.33461	4.01502	5.13132	1.39847	-1.56063	4.5392	4.75534	3.44653	4.57443	1.3612	0.140962	-0.248259	3.55892	2.62422	1.9822	0.80813	-1.23496	-1.08125
ACSBG1	1.28256	2.14518	2.2376	1.54165	0.926159	2.30699	-0.89774	2.12768	1.53282	-0.454619	0.617806	-0.0672343	2.34773	-3.36934	-1.50091	-2.19688	4.27188	-2.91796	4.92728	2.53956	3.94137	1.54196	4.91211	-1.62122	1.5369	1.57811
BCL2L14	3.47029	3.93151	2.65687	3.22029	3.57744	3.16288	1.33389	3.28113	2.08322	2.9155	2.57334	3.53939	4.11913	2.07224	-3.78593	-5.17665	3.43059	3.00326	4.00999	3.20871	3.69071	2.04274	4.01626	3.32621	3.85945	2.5021
MYB	3.88968	4.78865	3.66366	4.84134	3.90625	4.48035	1.39808	5.15932	1.1998	4.22428	3.67456	4.06563	4.77503	3.44878	-3.17863	-3.82978	3.65476	2.07914	3.9637	4.61386	3.71467	2.77758	4.29352	4.34521	4.7713	2.70058
PIEZO2	-1.07079	-2.20797	-0.488498	1.19569	1.85653	-2.39145	3.4237	0.29537	-0.525332	1.22073	1.41233	0.467405	-3.16183	-0.311327	-3.89097	-6.42236	-1.37444	0.343681	-2.43266	3.5877	-0.893692	-0.737822	-1.83051	-1.44034	-4.12381	-3.80856
VIL1	4.92893	6.16412	5.40376	4.82552	4.93131	4.06079	3.35776	4.47665	3.02085	5.62319	5.07649	2.62305	6.22119	5.18124	-1.29718	-2.61228	6.42606	3.06343	7.9126	5.00542	7.51958	4.95016	7.1133	5.82759	5.91062	5.28238
PLEK	2.72315	3.00854	4.4414	3.12416	1.64172	0.820837	5.13109	2.17358	4.93826	6.56613	2.70019	2.32358	0.469573	5.18235	1.91186	1.10223	-0.625767	4.22518	-2.9325	3.38864	2.07895	3.27783	-2.79194	1.99321	0.204141	4.49465
SLC22A23	3.52956	3.54322	3.7222	4.0217	3.73353	3.80896	2.15985	6.03477	2.55937	3.42746	0.912887	4.04336	3.91517	2.33556	-3.5105	-4.06059	4.65071	1.0689	5.61897	5.06437	4.17347	2.72952	5.33718	2.57029	3.17842	2.41457
SLC8A1	-0.907092	-0.837465	0.324672	-1.06949	-2.37378	-1.89243	2.75117	-1.86894	3.44683	2.45084	3.40496	1.89825	-3.97501	2.71223	-1.17788	-1.14559	2.00833	0.354667	-2.74678	-1.78012	-0.213461	1.04778	-1.24712	-1.27795	-4.44096	-2.50493
MUC1	5.66322	4.40951	4.10223	5.12754	4.55688	4.65856	-1.3231	6.35751	2.04353	3.5721	3.58171	5.64395	3.75208	1.90944	-0.183245	-0.866807	2.55122	1.54936	2.71058	6.15652	4.58826	4.51519	3.35887	3.87914	4.59697	2.93153
FAM26E	-1.91559	-2.19523	-0.567693	-2.02986	-1.81025	-3.9491	3.06773	-4.60105	1.45065	1.38093	2.85327	1.85145	-3.39712	0.315137	2.80979	2.66188	0.730505	0.918348	-4.32533	-2.17312	0.382877	0.981378	-1.597	-0.454737	-1.93171	-2.5447
SYNC	-2.4221	-3.62088	-2.45639	-2.53138	-1.73457	-2.64132	-1.62928	-2.41215	3.18736	1.27635	3.05428	-2.17743	-3.41761	2.69402	-1.03376	-2.14346	0.72738	-3.36691	-3.58916	-1.9345	0.156513	-1.26591	-1.73518	-2.93718	-4.99035	-3.80866
FAR2	3.99557	5.80687	5.1639	4.37844	3.75536	2.79072	3.20662	2.27419	2.81933	5.37179	3.86396	4.15743	5.08205	3.93785	-1.1745	-3.69296	5.59147	3.04505	5.75485	4.2636	5.95464	4.12857	6.33893	5.01394	4.87939	5.09967
DGAT2	2.74195	1.04983	2.97231	1.98947	1.46203	-0.186323	7.32797	1.08706	4.46571	5.76118	0.471271	0.32075	0.980055	4.02875	1.19638	0.352499	0.628447	2.9762	-5.1165	2.22581	0.391251	1.52584	-0.627046	1.51416	0.138461	3.00197
CHMP4C	2.93338	3.11202	3.23486	-1.96167	1.77262	2.80674	2.54486	-3.11376	3.04799	2.04697	3.07206	0.533912	4.3696	3.51065	3.71096	3.63181	5.36785	2.36741	6.24251	1.82978	5.78004	4.2792	6.0225	3.95015	4.29132	3.43333
NECAB1	-1.81908	0.155076	-0.977378	-2.78408	-2.04308	-1.17347	0.490478	-6.62643	-1.1296	-2.77357	1.08276	-2.40437	0.647388	2.17239	-4.67961	-4.76069	0.993428	-2.57482	-0.00355629	-2.40563	1.47519	-1.39868	1.36981	1.13039	1.54274	1.2858
HACD1	-0.0217121	0.246335	-0.235571	-0.129713	-2.30732	-1.61024	2.03561	-2.95411	4.29028	1.59068	2.19206	-0.479396	-0.779338	3.61743	-2.59202	-1.64117	2.79914	-0.462157	-4.98458	0.163679	0.437856	-0.369157	-1.43876	-1.04155	-1.00199	0.692231
ITGAM	-3.6872	-0.867384	1.5292	0.130615	-1.86851	-1.91298	3.01084	-1.45679	3.35602	3.68142	-1.01613	0.726822	-1.51458	2.12355	0.147255	0.105584	-2.14467	0.47334	-5.84831	0.0413692	-0.474396	-0.0418567	-4.7148	-0.695199	-3.18328	1.0994
GNB4	1.72202	2.05822	2.08263	2.00583	-0.0664787	0.364606	4.52156	1.56866	6.09353	4.81805	4.98195	2.70184	-1.34682	5.12076	6.87632	6.11685	4.07668	3.18236	0.581901	1.89437	2.56236	3.11252	1.43479	1.60934	-1.4626	0.933996
KANK1	1.11756	2.80561	2.35133	2.71371	0.785006	1.88642	3.03612	-0.176686	5.37072	4.13171	3.64645	2.10713	2.67405	4.18364	-2.76114	-5.38435	4.3953	0.691632	3.14188	2.04888	2.89552	1.26806	3.01682	2.11869	2.3835	0.0752999
STMN3	2.54406	0.848638	2.42998	0.068492	0.96502	1.2114	2.84382	2.29855	0.748753	0.622546	2.87018	1.59629	2.7979	2.71643	8.89106	9.52488	2.02131	3.20943	-0.439035	0.0674322	1.97189	2.12524	2.40196	0.585463	-0.605023	1.74762
THY1	2.73397	2.46609	3.25265	2.25571	0.859477	-0.162955	6.71798	0.809349	3.92552	5.09201	5.51848	3.51129	-0.379445	3.75333	8.6676	7.73863	2.38073	5.25005	0.953094	1.7038	3.79305	4.23278	1.53583	2.21032	0.410341	1.58309
DUSP2	3.70242	4.01489	4.71285	3.81548	2.24902	2.2735	4.43717	2.70854	3.61535	5.9162	0.40258	0.0994164	0.696768	3.14414	-1.74906	-1.49081	-1.4599	5.2982	-1.58123	2.97529	1.90121	3.51469	-0.611647	3.16351	0.462806	3.97812
COL21A1	2.98451	3.89472	-1.95813	0.623708	-2.00467	-1.87892	0.901216	4.87147	-0.520283	1.11485	2.7684	1.5851	1.64016	-0.113823	-0.134575	-2.22633	-2.84044	-0.726043	-3.06325	-0.977489	-1.25905	0.710746	-4.9707	0.436236	0.314058	-3.09206
KIF21A	3.26297	3.55243	3.03075	2.01955	0.963814	3.3962	-0.0966084	2.17929	1.10188	2.19476	1.87307	2.41077	2.91208	2.11834	-4.63665	-5.8278	3.442	0.648603	4.25981	2.31895	3.14476	2.37175	3.74051	2.94976	2.67396	3.55865
snoU85	7.08125	3.26707	4.13317	1.72137	3.6358	5.40654	1.10598	2.21057	-0.375701	-0.742767	6.33901	2.19473	2.91569	2.91107	-0.359979	2.85892	4.84591	3.92423	-0.0648632	-0.887994	2.96904	4.78795	4.31587	4.85507	5.33073	1.72725
ARHGDIG	1.32085	0.211124	0.829517	3.11885	4.04582	-1.00814	2.48978	4.60509	1.8766	1.39867	2.36459	4.38067	0.81651	2.93917	5.7035	6.295	2.5772	1.17924	-2.02867	4.25039	0.920469	0.492284	-0.332555	0.880944	-1.10104	-1.28639
SFRP4	1.64334	0.0972602	2.35894	-1.20339	-2.72722	0.912566	1.44717	-3.56192	2.00939	0.607446	1.77772	3.36143	-0.692599	3.84194	5.54994	2.38677	2.47657	3.83718	-3.00001	-0.994778	2.53725	2.21475	0.574102	1.95564	-1.63187	0.373197
PDE3A	-0.804148	-0.441098	0.63876	-1.05208	-2.2403	-2.49659	1.57986	-1.65424	3.36878	3.11172	2.97029	0.629529	-2.40309	2.76746	0.925718	1.17246	3.78582	0.294288	4.39643	-0.142884	2.58846	1.77027	3.90518	-1.30347	-3.50968	-0.470585
BOC	-0.138229	-0.185994	-1.09862	-1.78909	-3.12139	-4.06023	2.83352	-1.71085	2.86802	1.35833	1.6564	0.173127	-2.6965	2.48264	3.41118	2.41004	1.21013	1.70384	-0.330944	-1.07015	-0.0341145	0.139928	0.790347	-1.46571	-4.7435	-3.50552
EPHA4	-1.16338	-1.71162	-3.52404	2.05245	2.09121	-1.80152	-1.51978	2.44283	-2.38296	-0.0461239	-0.31477	0.583144	-4.52814	-0.604599	-4.38935	-5.84375	-2.68584	-2.0342	-4.58956	2.63607	-2.76997	-1.60817	-2.45644	-3.64555	-3.40164	-3.92257
S100A14	6.56061	6.00402	6.51994	6.48349	6.2647	5.48482	3.48876	7.26277	3.84672	5.54521	2.84418	7.33155	6.7514	5.38556	-0.453403	0.0919503	7.22889	4.54819	7.78103	6.3326	7.95682	7.43658	7.93234	6.05299	6.61706	6.57254
CLDN1	3.23488	3.24795	3.01248	3.54698	4.15683	2.47194	5.1234	5.7498	1.47062	1.12476	5.13781	4.8086	0.697551	2.90259	8.02431	6.44388	0.547549	3.64091	-1.86593	5.2765	1.63582	4.36858	-0.162766	2.56082	0.295406	1.04989
FHL2	4.5833	5.64708	5.96819	5.41371	4.74112	4.70679	2.59762	5.45839	4.16467	5.78354	4.43045	4.50271	5.81361	4.96276	-1.94197	-3.46493	5.42723	3.06873	5.95799	5.46316	5.99914	5.14676	5.51251	5.27021	5.32421	6.67744
EDN1	2.82515	2.78158	3.57678	5.84451	3.32759	3.53406	3.95169	4.39877	2.2822	3.66753	0.537704	1.45819	3.92336	2.78349	-4.14278	-3.95665	1.40069	0.604811	3.37302	2.86879	2.76898	3.03794	1.49123	5.94351	2.80253	3.55824
SEL1L3	4.64761	4.9571	4.87134	5.1529	4.14677	5.26306	1.69578	5.46418	2.45017	4.51762	1.79259	4.34547	4.97538	2.42464	-2.46725	-2.58861	3.60372	2.13487	4.51354	5.38194	4.47304	3.66559	4.45709	4.31577	3.86911	4.82631
REM1	-0.703229	-3.52794	0.444434	-1.73476	-3.46013	-2.85917	2.4136	-3.412	0.264669	1.9416	1.98522	-0.0382344	-2.88867	1.66437	1.56531	1.34095	0.291497	2.10082	-4.97266	-3.77788	0.789554	0.45465	-1.88379	-1.40835	-3.313	-3.30476
EPN3	2.44992	2.20259	1.39157	2.55076	1.97116	2.10457	-2.4161	3.38419	0.158583	1.6291	-2.6099	3.41994	1.86472	-0.635015	-3.64625	-4.93636	2.26112	-1.7837	3.04391	3.29703	1.63307	-1.02081	2.71448	1.03572	1.06282	0.0748753
MGST2	6.29226	6.86138	6.76787	7.28861	7.86457	7.26206	4.0987	7.45651	5.11218	4.86589	5.46639	6.87454	7.46459	6.60596	-0.773482	-0.684807	7.28807	5.08321	7.57103	7.28071	7.9697	7.29778	8.02115	7.64771	7.60626	7.06039
LAD1	5.47457	5.02154	4.97178	5.96821	5.845	4.44655	2.8645	6.51583	2.77986	4.49634	4.18035	4.81379	5.32143	3.94225	-1.38549	-2.39351	5.7638	2.60962	6.70558	6.40075	6.14644	3.98297	6.41547	4.60901	5.25729	4.97702
CCDC80	1.90549	1.02354	3.59876	1.48593	0.325202	-0.137632	6.91787	-0.866434	4.55077	4.84361	6.77265	5.3632	-0.413165	4.10348	2.37984	0.872608	2.93207	4.13631	0.198268	0.870021	4.14898	5.37728	2.52027	2.73975	-0.333858	-0.174963
ADAM33	-0.849599	-1.25544	1.14832	0.486416	-0.695818	1.30319	4.40981	-1.61363	3.76509	2.95869	3.16437	2.31079	-3.70064	2.45799	5.3399	5.61099	2.19016	0.700671	-0.256046	0.321409	0.534978	1.1932	0.217256	-0.220396	-2.00676	-0.173959
PERP	6.09029	6.01837	5.46812	6.76086	7.24043	6.63756	2.26312	7.41761	3.44216	5.09081	3.17706	6.9499	7.26557	5.7409	-0.246664	-0.844714	5.55258	2.92688	6.50108	6.79694	6.48504	5.19771	6.00273	6.71145	6.42411	5.0943
HSPB8	5.09691	1.46758	4.1231	5.02541	5.65118	5.94877	4.95242	6.15415	7.75161	5.68458	4.96063	6.14838	2.53153	6.15671	1.61222	0.760306	6.70591	2.64907	0.223064	5.51967	4.13984	2.97019	3.00624	3.37594	-0.37683	4.20632
HTRA3	1.87013	1.04411	3.79115	2.13304	-0.151509	-0.337856	6.31629	-0.170355	1.38391	4.53085	4.7821	4.66241	0.928859	3.57511	7.5516	6.23858	1.33719	2.42495	-0.651129	1.30789	3.3483	4.12853	1.09058	2.9831	0.284254	0.635717
MSC	2.14951	2.28414	3.48691	0.884864	-0.969958	0.0268001	4.70806	-1.71671	2.74156	4.47774	3.72083	2.30792	-0.0986477	1.98331	-2.4682	-3.74204	3.79984	3.91185	3.50866	1.12044	2.63443	2.86863	4.0403	0.622068	0.470719	0.349512
GALNT5	0.565051	2.4362	3.2844	-0.95091	-0.503378	0.364819	-0.472397	-2.16202	2.17726	0.471624	-0.158648	-0.419455	2.76314	1.14596	-5.125	-3.97049	3.01909	-1.89312	3.75744	1.0723	2.90994	2.05919	3.63454	0.069331	-1.59827	0.593258
SLC24A3	-0.682087	-0.434549	-0.739625	-1.11619	-2.61733	-3.14495	-0.686392	-1.54792	4.48787	2.63575	1.41339	-2.65238	-2.98265	1.06659	-3.17817	-5.83777	3.22605	-0.472099	-0.295854	-1.5156	0.763199	-0.728388	0.691436	-1.76798	-2.58111	-2.47759
TBX3	3.54035	3.98462	2.28916	3.09305	2.26891	3.70678	1.36763	3.7432	0.995072	3.70843	-0.601809	3.9619	3.15751	2.06658	-3.95025	-4.838	0.487435	-0.92106	2.21231	2.66709	0.66791	0.302313	-0.151846	2.67464	3.62096	2.85486
CA4	6.95521	5.54822	5.22063	6.39784	8.11482	3.51598	4.05961	6.54033	5.46427	5.37336	0.180632	3.33169	5.47423	6.90203	5.70939	4.48769	8.92271	4.20021	9.7897	6.1752	9.71594	6.5016	9.48971	5.42136	7.11271	5.08334
WDFY4	3.29354	-1.10279	1.98889	0.929836	1.28097	-1.34663	2.68829	1.8522	1.87344	2.16696	1.21757	0.764108	-0.861526	0.680792	0.0477478	-0.457597	-3.35042	4.10895	-5.24344	0.908129	0.252791	1.01656	-3.45903	-0.360557	-3.41566	-1.00428
CD248	-1.62804	1.13725	1.26695	0.280137	-0.453069	-0.858745	6.59959	-1.33865	1.68168	3.08518	3.74056	3.03934	-1.81821	1.86867	6.15951	4.36017	0.0163965	1.4571	-1.62213	-0.0383485	1.58629	1.90939	0.00900312	0.693471	-0.859067	-0.333272
CNRIP1	0.54664	-1.03668	0.805235	-1.70758	-1.4198	-1.05947	4.18249	-2.19593	0.97813	1.36449	3.42145	2.10125	-1.75647	1.17061	5.66266	5.18248	0.834177	2.7996	-0.789609	-1.75496	1.49985	2.00633	0.682627	-0.528598	-1.87126	-2.7914
ERICH2	3.33521	1.87343	-0.0910672	1.71801	3.19091	3.01569	-0.112776	2.83652	-2.1838	-2.51166	-1.56791	2.989	4.04926	0.732929	1.59419	1.60432	-2.65405	-4.19489	-1.75365	2.8635	0.0270266	0.32142	-1.43596	1.43995	0.489882	2.7282
UNC79	-2.19063	-0.8603	1.27866	-1.26506	-3.39284	-4.03777	-2.41724	-6.42552	-1.141	-3.96717	-0.698593	-5.86984	0.722081	-2.45469	0.294394	-0.900395	0.353696	-4.55515	-0.379845	-1.90573	1.15982	1.62278	1.25572	-1.78235	-1.10586	-0.248823
GFPT2	0.169592	-0.442001	3.97603	-0.110375	-0.885854	-2.80884	5.88088	-1.02309	3.003	3.26552	2.12047	1.43053	-3.06202	0.443702	3.23672	2.09339	0.0419719	1.64497	-2.37343	-2.34591	1.12988	1.28099	0.310189	1.1895	-3.20423	-0.66785
RNF43	4.86516	5.7564	3.2211	4.77925	3.8335	5.03136	0.503949	3.94867	2.05814	3.75127	2.09487	5.55756	5.07317	3.73412	-2.25799	-3.15376	2.60575	0.862344	3.41519	5.31713	2.48817	1.8029	3.24055	5.07175	4.96798	3.71252
VWA5A	2.15621	-0.0407685	2.53602	-0.657582	-1.84591	-1.49016	4.31856	-2.27459	3.45782	2.83612	2.84351	1.64602	-4.07005	2.10208	-0.52494	-0.460699	-0.0333377	4.57092	-1.03104	0.288559	1.69733	2.60652	0.495613	0.581091	-3.94811	-0.429127
RXRG	-0.406761	1.36901	0.955886	-0.972387	-0.165182	0.487702	4.11592	0.646338	0.457668	1.57938	4.60172	2.48889	0.241889	1.41549	8.51988	7.65513	1.25436	2.43489	0.489933	1.00469	1.34969	2.90574	0.741238	0.306286	0.294488	0.308908
PRKD1	-0.772404	-2.04687	-0.935691	-1.47345	-2.50477	-2.14909	2.37714	-2.88599	3.66029	1.60274	1.9058	-0.876098	-4.81159	2.79626	-2.87848	-3.03655	2.0724	0.427274	-1.93563	-1.69028	-0.16191	-0.0128392	-1.22776	-1.74986	-2.52856	-0.844147
CDK14	-0.713478	-1.74873	-0.418975	-0.574481	-1.57596	-1.92165	3.36551	-3.15611	2.25266	1.88813	3.00282	1.09484	-3.09099	1.77115	4.69087	4.1736	0.677783	1.40454	-1.74823	-0.851777	0.257904	1.29476	-0.673672	-0.697869	-3.51303	-2.08905
PRSS22	0.970235	-1.27161	2.14001	3.51253	3.40107	3.36571	0.974713	4.87817	0.64223	3.21301	0.827949	2.02651	0.0225738	-1.37143	-3.36654	-2.62358	2.21491	1.07505	3.88349	2.83275	2.56567	1.59611	2.92073	-1.06164	-2.82811	2.58622
MYO15B	4.38092	5.85249	5.04977	5.29675	4.97085	5.60063	3.65738	5.36112	3.02129	6.02612	2.63249	5.39734	5.01591	4.39379	-2.08289	-2.49059	4.79691	2.51258	6.67807	5.43328	5.51055	3.90392	5.58355	5.0835	4.76157	5.10996
RGS4	2.55179	-0.718213	3.85533	0.0648691	0.61551	-1.45877	2.9674	-0.715389	3.97926	5.41055	2.73957	2.69605	0.564827	2.54555	-0.300418	-1.0056	2.29574	3.50746	0.985974	-0.0227494	1.80052	3.3304	-0.365225	0.904588	-4.77105	-1.2253
MAP1A	-0.648213	-2.13684	-0.193763	-1.79315	-2.05465	-2.21755	2.58003	-1.05077	4.06018	1.81359	2.30726	0.242694	-2.48718	3.90044	2.6806	1.12011	2.11537	-0.0193444	-2.27416	-2.24339	0.157897	0.174752	-0.561328	-1.07457	-2.53065	-3.40803
PEBP4	-0.120122	1.66821	-1.68687	0.443066	2.00586	1.66462	-3.33341	2.23605	-1.50739	-1.58192	-0.363421	1.48203	2.38544	-2.52699	2.96443	3.92674	-0.786191	-4.42688	-2.17486	0.587989	-0.0507131	-0.461762	-4.26236	-0.0367034	0.25544	2.13132
BCHE	0.492069	-0.038307	1.21395	-3.12287	-3.07019	-1.08479	0.987219	-1.20723	3.15239	0.00875937	4.37925	-2.94069	-2.17965	3.30561	-3.49957	-3.22911	3.00334	0.897264	-0.868663	-0.13103	0.799154	-0.177125	-0.0983943	-1.48008	-1.29778	-1.40274
CLU	7.66383	6.29397	6.38638	7.35165	7.83566	5.97714	7.40281	10.2493	6.59534	9.16591	5.53904	9.02223	7.26378	8.82297	2.84504	1.83533	4.087	8.54888	2.28852	7.94192	5.72754	6.36293	2.00218	7.10833	4.99006	5.03356
LUM	4.19743	5.23423	5.55477	6.02644	5.30996	4.63646	9.12633	3.52389	6.21491	7.79158	7.86523	6.75633	3.95204	6.87375	-0.0343893	-1.04529	4.85239	6.1999	2.51001	4.79785	6.28291	7.92698	4.22649	6.2952	3.80691	4.74602
ADGRE1	-2.23227	0.317211	0.755896	0.3284	-1.98189	-1.83769	2.48053	-0.778764	1.92669	3.24662	0.708567	0.653133	-1.74555	1.24827	-1.50029	-1.62962	-4.2687	-1.5625	-5.70989	0.430221	-1.36829	0.536739	-5.84479	-1.23593	-2.16386	1.10829
S100P	9.5934	7.86664	7.2041	9.69951	10.5782	10.4134	6.44152	9.30195	6.79636	5.99587	5.90165	10.8524	8.24174	6.42888	3.08174	5.03098	8.22064	8.15844	8.69195	9.14928	9.63344	9.69311	8.94276	8.40669	9.23013	9.6883
ADAMDEC1	3.96049	4.33214	6.84318	4.61732	2.93232	4.10329	6.7947	0.277628	4.35681	4.49107	6.99871	4.59993	2.5286	3.32006	2.13088	-0.183369	5.50033	5.51009	2.55399	3.69329	7.335	7.51215	5.81336	4.91368	1.85253	3.86578
ATP2B4	1.17458	0.770093	1.59634	0.77489	-0.812052	-1.13936	3.55742	-0.430997	5.4763	4.36708	3.85333	2.02985	-2.03312	4.75306	3.65253	2.37058	3.85304	1.86429	-0.771877	0.249433	1.35755	1.83279	1.20654	-0.296515	-2.02303	-0.905832
ITGA11	-2.67266	-0.408997	-1.81978	-0.169715	-1.43463	-3.55155	3.46939	-1.12666	-5.67964	0.234182	4.72446	2.83815	-3.06223	-0.205523	0.138107	-0.501639	-0.141906	0.925491	-1.0175	-1.02229	-1.22545	2.55235	-0.680338	0.0780769	-1.1978	-0.696676
VSIG4	-1.43266	1.95472	2.22863	1.43059	-0.139048	1.43747	5.88637	0.180504	3.12959	4.11182	3.7541	4.32602	-0.280827	2.58794	4.11453	4.36976	-0.0808323	4.10228	-3.33358	1.33947	2.53886	4.16442	-1.69814	1.29177	-0.699619	0.653656
TRAT1	-0.330344	-3.72342	-0.467047	-3.08445	-4.15856	-2.44973	0.687643	-5.16822	-0.749242	-1.73247	-2.50223	-6.41233	-3.38653	-2.70646	-4.636	-3.32011	0.802011	3.59763	-1.31456	-1.6243	-0.0830373	-0.430713	1.51254	-2.23038	-3.20767	-0.0724448
SPP1	7.5594	10.3029	8.19273	9.39325	10.2168	8.93892	7.98518	9.82658	8.50733	8.71506	7.16402	11.2817	11.3997	10.8578	6.60304	8.19628	5.45175	9.0761	4.19093	7.53223	5.6819	7.72873	6.08779	10.6622	7.21191	8.64925
DDAH1	0.0887386	-1.17185	0.318889	-1.93449	-2.49896	-3.55734	0.910264	-3.05389	1.36026	1.55647	0.844458	1.71041	-6.03789	2.13309	-1.30211	-1.87361	1.25171	-0.765457	0.199738	-2.1391	0.762247	-0.782762	-1.82982	-0.764464	-5.87145	-2.93304
CCDC136	-2.77123	-6.08987	-3.32257	-4.82001	-6.33855	-5.11546	-1.28564	-4.17722	0.751746	-1.20047	-0.890741	-2.94765	-5.89264	0.490416	-2.09302	-1.23884	-0.597686	-1.19321	-3.93352	-4.80056	-3.96566	-2.31088	-2.1845	-4.072	-4.80781	-6.30278
FREM2	0.646568	0.610596	-1.49888	0.331327	-0.0202614	-0.302945	-3.49498	2.15939	0.408842	-0.073624	-0.44881	2.16978	-0.0451396	-0.00116328	-6.70545	-6.53983	0.111325	-3.17309	-1.45855	0.592464	-1.91651	-2.68361	-0.979325	-0.949288	-2.88736	-2.51023
DHRS9	0.980354	3.17064	1.18416	0.591507	1.41038	2.42837	4.44495	1.14431	-1.74102	2.38402	1.45882	2.64612	0.440825	0.514148	6.06452	5.27481	1.44586	1.29622	4.18116	1.89772	2.91079	2.83288	1.44682	-0.0254443	1.60062	1.21298
CD22	5.19216	0.538399	3.65875	1.24153	0.752706	1.66245	2.99552	0.0248303	0.15716	1.36892	-0.295518	1.19961	1.11309	-1.08728	-1.05336	-1.75526	-2.17082	5.98914	-2.04073	2.17753	1.3056	1.94313	-1.35007	1.69222	-0.855296	-1.94841
ADAMTSL4	-1.06191	-0.304136	0.329147	-1.49901	-1.74809	-1.33625	3.07243	-1.684	2.70716	1.57786	2.18273	0.789738	-2.87116	2.39756	5.04915	4.64458	2.05296	0.532756	-1.74424	-1.28721	0.0538064	0.496288	0.529851	-0.366137	-3.50817	-1.26281
GZMK	2.70643	-1.74989	3.16299	1.2158	0.22273	0.197928	5.06474	1.18133	4.10517	1.90482	1.62607	-0.520552	-0.335736	0.158272	-0.383735	0.180428	-0.585999	6.28853	-2.9125	0.885199	4.2561	4.05604	-0.56977	0.614512	-1.44929	0.55813
NAV3	0.453059	-1.3026	-2.19175	3.33908	2.25479	-2.34985	2.34224	2.17471	0.233962	-0.245839	0.883902	1.10292	-1.4648	-0.952735	0.628839	0.279471	-2.67335	-0.543585	-5.30752	0.983619	-3.61579	-1.31106	-2.66549	-1.50121	-3.28387	-4.64766
DDIT4L	-0.456754	-3.10963	-2.32026	-5.58165	-1.4079	0.794062	0.0859005	2.50911	2.05992	1.06024	-0.662588	1.60835	-5.15002	1.65285	-1.63796	-1.93725	1.69209	0.590674	-2.41409	-2.22759	0.156733	-0.0279721	-0.446687	-1.52231	-3.99666	-2.40489
RHOV	2.38225	3.71788	2.34723	3.34244	2.60531	2.66334	-1.9387	3.19625	-2.68807	1.29091	-2.24145	2.58631	3.45026	1.26998	-1.65125	-2.69518	-0.700223	-0.683537	0.417639	2.60336	-0.036995	1.31074	-0.236068	2.49953	2.83105	3.22458
DDR2	0.0924916	0.508246	1.25416	0.78401	-1.39544	-1.54821	4.13284	-0.332215	4.57357	3.61982	3.54715	1.50437	-3.8659	3.69271	3.17298	2.17181	2.71438	1.03655	-0.0508207	-0.853212	1.09285	1.13409	0.579267	0.0171665	-3.01023	-1.21396
ARMCX1	-0.334969	0.877705	1.39719	0.303529	-0.879924	-1.59355	3.82044	-3.64917	3.95763	2.5962	3.45727	1.40802	-1.26984	3.24934	3.58453	2.85337	3.23587	0.9186	-1.34078	-0.865054	1.668	1.3823	1.36769	0.789796	-2.72627	-0.712201
FXYD1	2.76132	0.583981	3.78918	2.23867	1.02094	1.60925	6.21401	0.081176	5.66479	4.46522	6.36618	3.38654	0.495695	5.36741	6.56816	6.6878	5.48742	4.60004	1.03915	1.43063	4.80337	4.81	3.16274	2.92631	0.403235	1.44968
SDK2	0.424299	3.03853	-1.50214	-1.4895	-2.01692	1.74476	-1.36854	-4.5173	-0.4538	-1.15484	-2.43309	-0.207689	1.30107	-0.914907	-5.3229	-5.64966	-0.0365954	-3.77127	0.468708	1.17141	-0.673476	-1.92147	0.719525	0.850231	1.86972	0.930268
LTBP1	2.40662	0.717395	3.69443	2.41233	1.61944	-0.239726	3.38596	1.78253	4.94214	5.53811	5.06078	3.36751	0.592713	5.175	-1.07904	-2.41632	4.15744	3.045	-0.116359	1.54754	3.91783	4.14003	1.98128	2.08429	-1.49512	-0.276448
INHBB	3.30365	2.30146	1.47876	3.99045	3.99893	3.97992	3.78153	4.83298	1.86341	4.50634	1.13056	5.54278	3.02738	2.58166	-0.885452	0.0712684	0.9297	-0.99812	-0.439207	5.0861	-1.86036	0.548831	-3.12452	2.64511	2.06814	2.33812
TMOD1	0.991093	1.16063	0.991347	-0.38216	0.384415	-2.80501	0.670895	1.31508	4.16184	2.51893	2.36881	-1.36108	-0.203608	3.11802	-0.239932	-1.17785	3.92134	-2.27385	-3.2479	-3.12267	0.852662	-0.392099	-0.980839	-0.746272	-0.941889	-0.805396
FAM177B	2.50769	2.00682	2.67887	3.7357	1.41152	4.87127	-1.33471	-0.0923771	1.49412	-0.406843	-4.04067	3.52985	4.37887	0.411969	-0.461005	1.3483	3.26958	0.521835	3.87621	2.36901	3.95149	3.82763	3.78622	2.79694	0.760545	1.15882
FCMR	5.20214	1.40713	3.74084	-0.314175	0.633961	-2.03382	4.20149	0.168	1.17683	1.11413	2.73691	1.01498	-0.98959	-0.462907	1.77928	1.29005	0.868671	7.13124	-1.40968	1.46872	3.04589	3.4684	1.29835	2.12288	-1.03461	-0.569937
NTNG2	-1.04846	-2.99872	-0.462917	-2.80301	-3.88812	-3.62586	1.3496	-4.61073	2.35661	1.05914	0.248498	-1.52024	-4.38385	1.32461	-2.59326	-3.31096	1.06363	1.15696	-3.78504	-2.51053	-0.730459	-1.64556	-2.1993	-0.936307	-3.28214	-4.9339
GPNMB	1.0273	3.75472	4.28076	3.41959	2.39833	3.17006	6.36817	1.71244	4.44695	7.43075	6.04868	6.95693	0.679667	4.18794	4.51065	3.86849	-0.645884	7.12808	1.07907	3.10954	4.40093	5.94667	0.153987	3.13332	1.94541	1.7407
RAB19	2.83762	3.31173	3.41186	3.51564	3.38578	3.16373	0.069496	3.54039	0.59189	2.33017	2.66745	2.65042	4.42695	1.70515	-5.32453	-2.60286	2.35344	2.03315	3.10794	3.121	3.75681	2.80684	3.03201	2.7212	3.06913	3.25256
IL1RL1	-3.77274	1.7604	1.31517	-0.0162304	-0.590141	-1.98212	2.32213	-3.44684	-1.06523	0.578205	0.735791	-0.710959	-1.50917	-2.13202	-4.66781	-5.72852	-4.13553	-1.60251	-2.72934	0.666511	-1.68172	-2.72081	-3.37045	-0.647775	-2.38784	1.6524
NCF1	4.36657	0.0687809	2.97881	0.518726	0.493699	-0.618263	2.28932	0.314905	2.97066	3.70984	2.52354	0.584703	-2.00572	2.07605	0.971464	0.78907	-2.40416	4.97977	-4.64314	1.27635	1.68544	2.48912	-2.39586	0.622003	-0.96028	1.10136
C3orf52	3.49019	3.88001	3.65377	4.82206	4.21722	3.64172	1.63137	4.30537	1.14585	3.8124	3.5172	4.08322	4.47765	4.18897	-2.89879	-3.25503	2.65713	0.650406	2.77398	5.00357	1.80073	2.42493	3.17138	3.93987	4.03152	3.79775
GLDN	-0.488714	1.08376	-0.127212	-0.349316	-2.34164	0.00650629	4.06043	-0.174385	1.68014	2.02486	4.67791	4.03227	-1.3199	1.40833	-0.26169	-1.15202	-3.9911	2.66956	-3.59933	0.461382	1.04196	2.76463	-1.9516	-1.81827	-0.401263	-0.952788
OGN	1.00707	-1.40489	1.73343	0.249203	-0.720952	-2.16254	2.19339	-3.76329	1.4786	-0.237413	4.75097	-0.691208	-2.22645	-0.662303	1.76309	0.610832	1.945	1.55871	-1.5344	-1.90299	2.90666	2.70802	1.81858	0.410157	-5.36713	-0.850155
APOC1	4.08748	4.60316	3.464	3.54628	4.1948	4.61957	7.42767	4.03416	5.40806	6.78543	7.88978	6.51886	2.82493	5.22583	6.66174	7.30637	1.30756	8.06875	0.0406961	5.22919	4.37709	7.09785	-0.357256	3.25452	4.5627	4.05413
PLEKHG6	2.60128	3.77804	3.35918	3.21543	2.68961	2.90097	-1.8266	4.47685	0.951364	2.29663	-0.410288	3.22263	3.20252	0.0688909	-1.81273	-2.32614	3.37373	-0.546825	4.94962	4.3471	4.48425	2.07565	3.86086	2.32154	3.12007	3.49625
RASSF8	1.09326	0.582874	1.8864	-0.554371	-0.820443	-1.53086	4.20493	-0.648435	4.66207	4.52177	3.07909	1.49992	-1.65591	3.56877	2.90767	2.15488	2.3984	1.54039	-2.13566	-0.56102	0.956897	1.90975	-1.1294	-0.0946583	-2.53898	-0.614092
PTK7	4.30843	4.81452	3.49701	4.85524	4.73763	4.6283	3.75558	5.86471	2.79029	4.9517	2.92486	4.79826	5.61717	3.14327	-1.97921	-4.33863	2.67344	1.23748	1.91674	5.10114	2.87609	2.85204	2.65469	3.87733	4.27536	3.48032
LHFP	0.648162	0.609679	1.53123	0.416148	-1.46068	-1.0944	4.66974	-2.72497	4.49125	3.19033	4.47905	2.17129	0.215877	3.64959	-1.89344	-1.75087	3.19893	2.67451	-0.158436	-0.483454	2.08147	2.34962	1.00734	1.39453	-1.16788	-0.768496
CALD1	4.19439	4.25139	5.19966	4.23677	3.82733	3.09065	7.03583	2.70435	9.15891	7.18977	7.73334	4.89289	2.92996	8.93	3.62768	2.55742	8.49608	4.86807	2.58561	3.23005	5.92896	5.97564	4.49104	4.92493	2.57848	3.54398
NQO1	9.06472	7.7524	2.89971	8.51748	8.7834	6.72739	2.40984	6.00734	3.30943	4.47267	2.16983	6.70055	5.19698	5.93644	3.91928	3.71151	3.89689	2.57181	5.00441	8.33301	2.90985	2.69054	4.61154	4.94804	7.50691	4.31831
CACNA2D1	-0.468182	-1.58515	0.0171808	-0.739825	-2.21689	-0.948698	2.12913	-3.27145	3.47032	2.72434	3.05231	0.300616	1.24982	2.94203	-3.00278	-3.63032	1.91094	0.766782	-2.6293	-1.82009	0.0353846	1.38066	0.3747	-1.07315	-1.5223	-2.07018
TMEM30B	4.70935	5.37614	4.60683	4.82235	4.56832	4.55663	3.51942	5.27998	2.47504	4.59798	4.10845	5.6351	4.93791	3.17971	-1.45892	-2.51001	5.28175	2.25093	5.99528	5.08753	4.93347	3.20635	5.8654	4.74967	4.97334	4.66162
MCAM	2.92332	3.70971	3.94876	2.97412	1.39408	1.18905	5.47572	0.421156	7.27999	6.1642	6.184	2.70423	0.73792	6.52833	2.29921	1.01099	6.75537	2.68833	1.57223	1.95242	4.16701	2.80031	3.60713	2.45523	0.968349	1.86345
DCN	5.42691	5.7526	6.35077	6.31291	6.16522	4.57365	10.5407	5.4025	7.43062	8.76962	8.29681	7.59423	4.01366	7.52082	12.0402	12.1301	6.20865	7.8859	3.97892	5.52924	7.06487	8.29185	6.18005	6.56007	3.80941	4.94399
P2RY10	3.53134	-0.198767	1.69754	-0.317914	-0.0503724	-2.75828	1.68402	-0.350094	-0.344837	-0.0115414	1.18958	-2.60086	-2.63457	-2.10056	-3.97731	-2.8094	-0.591997	6.10504	-1.07928	0.116218	0.595169	1.97302	0.286302	0.946027	-0.872523	-0.687012
PEG3	-0.456922	-1.8378	0.496043	-1.45989	-2.97927	-2.43528	2.96033	-3.50238	1.65453	1.13192	2.44808	0.426587	-4.08682	1.90612	3.8224	2.87965	0.607532	1.26975	-1.53033	-2.04404	-0.243479	0.509838	0.0961539	-0.696494	-3.53361	-2.93822
DTNA	1.22891	1.6718	0.878969	2.88376	2.82366	1.58438	1.54692	2.90189	5.04084	1.55557	3.2083	3.64903	1.69595	4.65935	0.10083	0.093141	4.41601	-2.24495	-1.82657	2.66065	1.03348	-0.415338	0.348912	2.0836	-0.0319697	-3.2211
PITPNM3	0.367651	1.18376	1.10654	2.56538	1.6587	3.43813	-2.17615	2.29157	0.387804	0.405088	-4.23746	2.58845	0.807676	-0.387899	-2.39943	-3.56293	0.186095	-2.33076	1.31874	3.34503	-2.02314	-0.560973	1.29322	1.37652	0.178594	1.24988
SLC6A17	1.44465	-1.84888	-0.455681	-0.996389	-0.231818	-4.64312	-1.30746	-0.597193	2.03792	1.37065	-0.163084	-0.97812	0.583923	2.76083	2.72735	1.2741	3.09729	-4.20302	-2.31285	0.614324	0.257361	0.632994	-0.98132	-2.33158	-2.5019	-3.4788
ZPLD1	-2.35672	-5.868	0.538856	-2.74117	-4.01174	-3.85778	0.872482	-5.96602	2.47535	-1.94545	0.0727095	0.309816	-3.44375	-3.51135	-1.31206	-0.264783	-0.193722	0.275365	-0.261955	-2.27647	-1.51611	-1.43874	-0.234874	-1.3148	-5.59641	-4.40468
SYDE2	0.0713371	0.96129	1.0038	1.60903	0.64321	-0.365721	-0.811959	0.933112	4.05009	1.75518	2.89578	0.921688	1.85143	2.3911	-5.82559	-4.98397	2.74547	0.103303	2.41043	1.03674	1.53438	1.01243	2.4406	1.21476	0.80587	1.33199
VDR	3.85692	7.96739	4.73854	2.35959	2.67055	2.41357	4.62373	3.96885	1.5471	2.41139	3.58767	3.35562	5.25639	4.25029	-0.429916	-2.89244	3.85301	2.42223	4.7129	2.78994	3.94906	2.34022	4.34647	5.46458	6.07578	3.93708
CXCL14	2.47761	3.18872	6.83485	4.86035	2.67085	1.45482	7.59718	1.84923	7.07935	7.05663	6.66191	4.84067	0.948967	6.50135	7.60563	6.23917	6.61253	4.03778	0.300194	3.19143	4.28629	5.09269	3.86063	4.96868	1.77684	2.89824
BCL11A	4.22728	3.29953	2.76169	3.29111	2.58275	2.96484	1.42174	2.93569	2.78109	2.11846	2.15885	2.94895	3.39259	3.16122	-4.92568	-4.7852	3.12463	4.68676	2.88878	3.20728	2.70046	1.79229	2.79936	2.90333	3.41646	1.25828
GZMA	-3.18027	-2.59329	0.573268	-2.42839	-0.671097	1.77634	0.470438	-1.19151	0.964428	1.22593	-1.93217	-2.76393	-3.78189	0.0780769	-1.93561	-0.709863	1.23973	-1.67594	1.85617	2.03268	3.98752	2.39862	2.20049	0.125096	-1.63716	1.30827
LNX1	1.40784	2.20136	2.39234	1.63819	0.893688	2.69653	0.299549	2.85028	-0.353977	2.39177	1.68857	0.933316	1.8699	2.04052	-5.43988	-4.36521	1.87629	-0.459953	3.88715	1.45759	3.19302	0.594138	2.55363	2.98848	1.64979	2.02708
PDK4	2.41281	1.85751	2.48885	1.93028	1.39557	0.62309	6.57071	1.67668	5.95647	7.11293	1.38655	3.52975	2.89452	6.07235	6.57351	6.06735	6.13714	2.53158	5.87167	1.90196	1.26893	2.07871	1.2204	2.02892	1.02957	5.10765
TNFAIP2	2.9667	2.90005	1.56083	4.37931	4.14937	0.0169099	2.6414	5.12532	2.80597	4.12141	0.954583	3.39328	1.72616	2.49236	3.05268	2.21524	-2.30762	2.25121	-3.75323	4.17536	-0.111807	1.40521	-2.84166	1.25366	1.42506	1.763
SLC1A3	-6.06377	-3.6075	-2.87883	-0.757248	-3.37496	-3.60961	3.11742	-1.60097	-0.323408	1.84163	-3.06768	-0.826069	-2.35871	0.953042	-2.52311	-3.92946	1.40176	-0.582687	-2.17142	-0.465112	-0.985088	-1.17701	1.86025	-3.15338	-2.75242	-2.98932
SORBS2	3.44725	3.37319	4.36671	5.23797	3.47829	4.06696	1.68055	4.28082	6.53577	5.20704	1.69424	3.77329	4.53303	5.53973	-1.37995	-2.76525	5.71021	0.347983	3.9078	5.08006	3.44485	2.18201	4.42002	3.35257	2.98339	3.4161
MATN4	-1.27585	-0.118478	-1.57275	-1.93656	-0.667859	-2.96964	1.06888	-4.07204	-1.22495	0.768146	3.87714	0.873199	0.477512	1.1475	4.49877	3.51783	-1.83731	-0.465377	-1.63582	0.734031	-0.874711	-1.6043	-1.77855	-0.940404	-0.878239	-4.44772
GAS6	1.43273	1.12662	3.26288	0.425062	0.291262	-1.56779	4.79173	0.352939	5.65547	4.33074	4.62053	2.08262	-1.08347	5.21926	1.74071	0.102282	5.14345	3.68918	1.58051	0.317848	3.47142	2.67765	2.93172	2.00814	-0.653977	0.687715
SEC16B	1.2429	1.09803	0.736752	1.13928	1.08963	1.80292	-0.16437	0.247599	-0.48434	-0.810706	0.361982	0.126973	1.38212	0.567526	-6.0617	-6.40703	0.921634	-1.4184	2.49351	1.71595	2.31521	0.287484	1.58825	1.83837	0.787491	1.22953
TIMP1	4.49568	5.1502	7.31401	6.03417	5.52669	2.82557	8.36004	3.94447	7.50071	9.58549	7.00037	7.60735	3.95014	7.15339	9.62012	8.47528	4.43277	7.90187	1.989	4.11714	7.4313	7.72614	2.75557	5.08511	3.06446	4.20191
FN1	3.85896	4.99304	4.91777	4.35636	3.89703	1.6647	7.32432	5.33044	7.93373	7.76396	8.64358	8.33048	2.2318	8.39157	6.39335	4.88699	5.12157	5.07862	1.81025	4.42465	5.57242	6.91695	2.58422	3.76823	2.53468	2.61976
MS4A2	-2.83911	-4.61906	0.571803	1.31412	-1.62348	-3.63015	3.61785	1.69069	3.2694	1.67622	1.93324	-2.05428	-1.04983	1.2821	-2.24042	-1.63447	-0.529262	1.70249	-3.41449	-0.236624	0.854395	-0.508085	0.819799	-1.13596	-2.03922	1.80301
HOPX	5.5233	5.14072	4.6366	4.92608	6.88302	3.91353	3.2728	6.43368	3.07515	4.22466	3.84451	3.98054	6.41038	4.34535	-2.84605	-1.72158	3.20386	5.12869	3.46964	5.5164	3.34635	4.18376	3.74995	6.39409	5.79615	4.713
SORCS2	1.03403	-1.02337	-2.58655	-0.388654	-1.0208	-1.92025	2.01271	2.23349	-0.647418	0.348516	2.38542	0.953712	-2.58843	0.13791	-1.14132	-3.55301	-0.53944	-1.77795	-3.69556	3.23258	-2.50076	0.146629	-2.76449	-1.34808	-3.7127	-5.88832
DACH1	2.40181	4.58325	3.05851	2.18022	3.15866	3.48534	0.707843	2.72702	0.171373	1.08691	0.463319	1.21901	4.82468	2.75941	-2.44742	-4.15589	0.223274	-1.06713	-0.316399	-0.109262	1.03805	0.688476	0.207643	3.69453	4.52212	-0.225041
PAG1	2.96321	0.429493	2.10646	0.147763	-0.186669	-0.218529	1.89486	-0.154202	3.46583	3.63001	1.54909	0.974581	-0.315201	0.969351	-4.86386	-3.74252	2.46871	3.35187	4.50614	0.810196	2.28238	2.85828	3.41349	-1.38255	-0.303506	1.04467
IL21R	2.12832	-1.58147	1.20996	-2.09475	-1.98097	-2.03588	1.08397	-1.14698	-0.321214	0.629594	0.862836	-1.70894	-3.74832	-0.753911	-2.19571	-2.27633	-3.82791	3.46167	-4.29139	-1.19016	-1.45297	0.191487	-4.36714	-1.11727	-4.96003	-3.9243
H3F3C	0.282547	1.89743	1.0833	1.47804	1.07821	1.93002	5.88775	1.79889	5.96755	6.52292	1.34633	2.13302	2.47244	0.779512	-0.0360436	0.361555	0.970986	0.519411	6.5064	6.67875	3.06408	1.2934	1.05549	1.60344	2.24543	1.58974
CPED1	-0.102916	1.10107	1.8535	-1.82767	-0.954222	-0.462716	3.11529	-0.716114	4.07057	3.27272	3.82353	2.01715	1.13698	3.83054	4.21798	2.94226	3.98671	0.571628	-1.03802	-1.6401	1.37771	1.85232	0.966275	0.618201	-1.22437	-1.76724
KCNH2	-0.385041	0.138775	0.990425	-0.995586	-2.70963	-1.91257	-0.177803	-1.92914	4.20685	1.77727	4.12468	-1.38726	1.44014	3.61644	2.52108	1.53569	3.22928	-1.90966	-0.718184	-0.727363	1.04561	0.26295	0.676746	-0.299933	-2.03255	-2.24405
APOD	3.04658	-0.320052	3.36356	4.83194	2.59292	-0.800488	5.3692	3.06274	4.4452	3.3561	3.97957	5.02616	0.36078	4.76407	3.88543	2.4338	4.22843	3.68394	2.64028	0.814731	4.1882	2.99256	2.74513	3.27262	-3.08174	-1.89392
HCK	2.22901	0.550842	1.37469	2.75336	2.60631	-0.399586	3.34618	3.82482	2.54994	4.60847	2.12898	0.705934	1.84734	2.05654	-0.0995254	0.339286	-2.32979	2.89826	-3.96993	2.70382	1.53947	1.80721	-3.51386	0.229489	-2.0911	0.761609
HS3ST1	3.15375	3.76041	4.10398	4.22681	2.48591	4.39167	3.98139	2.53543	2.73383	5.41906	1.86611	3.31887	4.17585	3.23411	-3.35358	-3.39787	2.16134	2.74205	2.45671	3.66339	2.64971	2.98712	2.21488	3.83834	4.63563	5.91595
FERMT2	2.61437	2.81552	3.8536	2.62115	2.0237	1.88418	6.41005	1.3779	7.68675	5.66565	6.20476	3.96778	1.53226	6.61061	7.19828	6.73579	6.22326	3.77473	1.5187	2.00858	4.3606	4.3066	3.07741	2.9596	1.31678	2.48135
ANK2	0.172552	-0.637511	0.20823	-2.16471	-4.1534	-5.45384	1.47059	-3.50462	1.27098	0.259628	1.03999	-1.83631	-1.51803	1.15807	2.43035	1.2597	0.143772	0.454502	-3.37118	-2.50228	-0.711325	-1.09716	-1.13228	-1.28112	-3.12915	-5.13523
AIM1L	2.13647	2.2482	0.433964	1.83798	2.23925	0.431783	-1.45339	3.89718	-1.83808	0.28187	-1.93675	2.36188	2.63396	0.722064	-4.31156	-2.70718	1.49438	-1.26853	3.05473	1.37569	2.38427	0.725985	2.10859	1.73321	1.21342	0.445388
WNK2	1.61047	2.84056	1.12951	3.24793	1.95969	2.1833	-5.27273	3.0614	-0.973605	0.800455	-0.985282	2.82399	1.50499	0.639658	-1.37245	-2.47357	0.55764	-3.16143	-1.77678	3.17432	-1.05586	-0.311447	-1.14931	0.383386	1.09735	-0.605479
ADARB1	-0.660771	-2.69894	-0.0535446	-0.827277	-3.50318	-2.07986	1.82201	-1.52869	3.78265	2.17148	2.32307	0.185638	-3.53508	2.74339	2.47036	1.01503	1.0406	0.503206	-1.69906	-1.0752	0.063779	-0.364264	-1.05418	-1.12013	-3.41459	-3.1483
INPP5J	-0.566222	-0.428572	-1.31457	-1.23405	-0.972444	0.793097	-1.39718	-0.386125	-1.3476	-1.75833	-2.63662	-0.464317	0.0712272	-1.36868	-5.06686	-4.54182	1.75175	-6.65971	2.71395	-0.225079	1.52261	-1.60454	2.44885	-1.35913	0.42693	-0.96103
BSPRY	4.66751	6.45191	5.38816	5.6009	5.28186	4.82358	2.34625	5.10178	3.05048	4.56313	4.17461	4.9705	6.1446	5.12571	-0.353017	-0.444881	6.09267	2.90977	6.68013	5.38943	6.70099	5.0894	6.57046	5.64354	5.46523	5.34837
FHL1	2.41547	1.79133	4.86576	3.16646	1.65119	2.1241	6.03257	0.52694	7.53121	5.23586	7.3366	3.58679	1.38473	5.87871	4.73571	4.23178	6.03189	4.03725	0.864493	2.27391	4.92161	4.21191	4.19288	2.86102	-0.355247	1.74578
ESPN	0.897937	1.84922	0.701052	1.34726	1.74211	-1.1724	-2.70391	1.51656	-3.25491	-3.11122	-1.66412	-0.978074	3.28361	-0.48108	-2.24072	-4.07134	1.39237	-0.581637	3.5279	0.533713	3.20147	0.461989	2.503	0.890073	0.40222	0.0447438
MSRB3	4.16253	2.28604	3.54835	4.22701	3.88706	3.04558	5.4998	5.07937	8.45469	5.86279	6.31842	4.92014	1.12431	7.68092	5.63278	5.03193	7.3542	3.84805	1.78698	4.5744	4.53618	4.0042	3.65075	3.41332	0.582681	1.17787
COL12A1	0.414785	3.10012	1.97831	2.36601	1.25065	0.0189047	4.79362	1.29117	4.92445	6.06623	4.60475	3.81684	-1.25466	4.81871	1.44758	0.28681	3.3939	0.765552	-1.73593	1.03787	0.947315	2.96166	0.604432	0.798084	-0.53594	0.760519
ERBB3	4.85085	6.10715	5.17465	5.67388	4.84844	5.64309	3.25989	5.93127	4.00161	5.17119	4.59611	5.99844	5.7358	4.56077	-0.280191	-1.81577	6.27771	3.14739	7.21742	6.3017	6.22212	4.57016	6.99809	4.98551	5.5662	4.63796
LRRC32	0.334259	0.837887	0.535585	-0.65768	-1.24542	-1.48194	4.52255	-2.19164	0.845221	3.48501	6.04659	4.5321	-1.9835	2.2448	1.60626	0.442588	0.9287	3.17073	-0.171726	-0.128749	1.34723	2.44074	-0.757508	0.887174	-2.48879	-0.49215
BHMT	-0.13824	0.406177	-0.35728	-2.16699	0.408516	-1.01578	-6.15516	-4.66707	1.16046	0.0437644	-1.32796	0.755964	-3.46294	0.213764	-1.68308	-0.991189	1.96126	-1.02151	-1.79781	-0.844738	-4.43053	-3.59127	-2.06287	1.72732	0.216262	0.622509
PPP2R2B	-0.255661	-4.71571	-1.0442	-2.03369	-1.03175	-3.38605	0.313815	-3.20438	2.01614	-0.522917	2.49574	-3.38222	-3.56793	1.95458	-1.18354	-2.57927	2.33827	-3.25631	-3.50825	-1.89969	-0.074634	-1.44358	-1.16925	-1.20606	-1.97926	-3.08369
FAM83B	2.19705	3.10035	1.4418	3.10055	2.77403	2.89051	-1.48248	2.55347	-0.822434	1.90011	-0.0495077	3.26676	2.4519	0.812498	-3.12855	-4.11414	-0.456985	-0.512831	1.07886	3.20331	1.38388	1.32262	0.253735	2.64136	2.4453	3.10975
GDPD3	3.60716	2.36832	2.62063	2.41238	3.20408	1.92391	-0.608518	3.36533	1.72967	0.386049	0.838686	2.51217	3.11262	-0.00575483	-4.1204	-1.83447	4.34137	2.73159	5.29856	3.29862	5.00633	2.73472	4.93099	3.17982	2.56991	1.70902
S100A4	6.27949	4.80403	6.27073	7.11829	6.64962	4.74375	6.87949	5.05175	6.36933	7.12117	8.002	6.45311	3.2135	6.34388	10.6096	12.4141	4.05325	8.58355	2.45959	6.35366	7.41073	8.98017	4.1926	6.4302	5.08534	4.77124
ZNF462	0.597946	2.14905	0.410764	0.569686	-1.30805	1.90441	1.34601	-0.740753	1.99164	1.95954	0.86542	2.07928	0.851215	1.77296	-4.98492	-6.18228	2.18376	-0.570032	3.23365	1.42465	0.53065	-1.02343	2.58491	0.677089	-0.194843	-0.832681
MTUS2	-0.907979	-0.911161	-0.299511	-2.3825	-3.86587	-3.38263	0.0438204	-1.95251	4.14187	1.84094	0.822828	-1.77443	-0.577399	2.73451	-0.136391	-1.50937	2.5019	-1.19446	-2.11152	-1.22839	-0.339948	0.137713	-0.523768	-0.603987	-3.23452	-2.20089
ZNF423	-0.270041	-2.2622	-0.204092	-1.50716	-2.54777	-3.60742	2.95417	-0.46037	0.655315	1.40409	1.86581	-0.19078	-4.36948	1.33453	4.22408	2.49145	-0.641995	1.12611	-1.76105	-2.94607	-0.389723	-0.422097	-0.304979	-2.70053	-2.67669	-3.58843
SMAD9	1.31814	-0.058192	-0.011556	0.326871	-0.766905	2.14526	2.95668	1.04576	3.60487	2.3584	3.8195	1.86315	0.354283	2.72637	-3.57942	-5.32805	2.46302	0.355231	-1.79879	1.53883	-0.105784	0.127884	-0.362327	0.0608498	-0.63072	-1.21795
APOL5	0.962179	-0.363293	0.414006	0.875151	-0.687818	-0.109528	4.15282	-1.47698	2.51376	2.37101	4.24195	2.37765	-0.990401	2.95472	6.25514	6.67243	2.43369	3.72038	0.902321	-0.0328122	2.97314	2.82945	1.25335	1.63152	-0.604283	-0.609537
RAB17	2.35405	3.75491	3.69797	2.49721	2.98566	3.74224	1.92503	3.62499	1.42325	2.76265	1.54847	2.65003	4.2889	3.08171	-2.64643	-3.68689	4.62278	1.32954	4.96726	2.81587	4.67804	2.759	5.01769	3.4464	3.50746	3.86968
DACT1	-0.846125	0.499813	0.835035	0.0697434	-1.88964	-0.736237	4.29498	0.147033	3.05118	3.20429	5.01324	2.58679	0.169656	2.77895	5.90772	4.66823	2.86383	2.22232	-0.127664	-0.679973	0.74135	2.15844	-0.0294511	-0.561794	-1.32057	-1.03399
RUSC2	-0.0735101	-0.00269603	0.383331	-0.88277	-2.1689	-1.93771	2.56385	-2.1005	3.55688	1.96346	2.40744	0.587471	-2.87521	2.04125	3.90979	3.08992	2.39452	-0.0751415	-1.88024	-1.57344	0.222261	0.383154	-0.0993074	-1.05709	-2.77378	-1.34326
LGI3	0.0339339	1.66749	-0.818071	1.28037	0.819317	-3.36154	-2.97998	0.976679	-0.413765	-1.15516	-4.29856	0.836991	2.45498	0.0657791	-1.32923	-4.55707	0.0141124	-4.65617	-3.46463	1.71203	-2.25738	-2.68547	-1.14983	-0.690242	-0.144876	-3.0856
ARHGAP15	2.75555	-0.600615	2.09133	-0.0394394	0.212731	-1.29482	2.11955	-1.16404	1.96374	1.75184	0.872726	-0.761216	-1.19109	1.01159	4.52845	6.19994	-1.16192	5.26687	-2.43214	0.320496	0.853333	2.3029	-1.14167	0.474908	-1.49208	1.16291
IGFBP5	0.959377	2.27483	2.81469	2.13392	1.08601	-0.35645	3.34786	3.17338	5.35168	5.65743	4.86265	3.35269	-0.585282	6.03361	4.65342	2.45426	3.65575	0.892795	-0.656915	2.13813	3.15387	4.37323	2.05111	1.36587	-1.84775	-0.361752
AIF1L	4.03524	3.08168	2.25101	4.04328	4.66388	4.60637	2.0229	5.45895	1.1741	0.330455	0.584174	4.78883	4.37055	2.33368	-1.53743	-1.59436	0.936576	0.158725	0.756255	4.01791	2.17621	0.0134122	2.20708	3.58672	1.6741	2.98494
CD5	3.483	2.48054	2.54048	2.74973	3.13924	1.69576	2.74949	1.64956	1.80747	1.03075	1.58202	0.303576	2.94956	0.571444	-2.95477	-2.20229	0.315497	4.93827	-0.133772	2.91286	1.96545	1.88077	1.23728	2.26544	2.73676	2.61846
BGN	4.05109	4.80969	4.80141	5.34204	4.14054	2.61809	9.09405	4.99205	5.18671	8.12375	9.15372	7.65032	2.47429	6.59713	6.12886	2.80666	3.71511	6.65881	1.26661	4.39126	5.271	7.02771	2.51774	4.01469	2.03948	2.96779
PTGIS	1.0429	2.37269	2.31922	1.42485	1.10598	0.299585	4.77063	-1.70801	5.9979	4.5396	2.71935	3.36827	2.2352	5.25251	-0.205848	-0.822922	4.08372	1.42101	-0.0102477	1.01351	2.94295	1.54439	1.80163	1.46497	-0.536436	-0.565885
PROB1	-0.926684	-1.69271	-0.335157	2.39603	-4.0431	-0.543175	0.126484	2.46555	-1.64764	-1.6914	-0.343132	1.72153	-0.521351	-3.56074	-4.05604	-4.05298	0.647913	-3.59534	0.981122	2.92118	0.671185	-0.913722	1.69558	-2.65738	0.164117	-0.429022
RPS6KA2	0.452838	1.83028	0.997061	0.204304	-0.56897	-0.489996	2.71397	1.00542	5.20145	3.79838	3.4086	1.0006	-0.559148	4.51304	4.21959	3.16385	4.93271	0.5528	0.0800846	1.07235	1.97043	1.29053	1.21303	-0.917017	-1.74297	-0.109768
BTK	3.80387	-0.0128771	2.25726	0.206931	0.225768	-0.699452	3.04014	-0.903981	1.70787	2.46968	2.78675	0.936613	-1.65207	0.568635	1.1522	1.61802	-1.92371	5.44409	-4.16775	0.00496873	1.36509	2.71756	-2.24059	0.862186	-1.5304	-0.918739
ANGPT4	-0.620545	-0.754139	1.18682	0.198607	-1.60748	-1.36851	4.62879	-3.17872	1.16432	2.85584	0.621009	0.82304	-2.57849	1.82668	-2.43305	-4.05423	0.00883106	1.23695	-2.23559	0.0726684	0.755828	1.25746	-0.357404	0.0580532	-4.47993	-1.91266
DPP4	5.25833	6.43371	4.45147	5.57817	4.70126	5.41197	2.95599	5.27274	2.78054	4.66034	-0.357411	5.14747	5.65241	3.91698	0.310177	-1.11515	5.35702	2.34533	6.90385	6.08229	5.84209	3.65986	5.81139	5.1798	5.58162	5.72928
EPHB2	4.51103	6.32743	4.61131	6.36898	4.88952	4.77833	1.36386	5.56237	2.1283	5.16735	3.91326	4.063	5.09268	3.35255	2.60407	0.170284	3.2275	0.468521	3.35712	6.58505	3.36135	2.36814	4.07163	4.51222	5.67646	4.30325
MAP3K7CL	-1.70493	-3.99931	-0.761015	-2.71568	-3.19523	-5.02082	1.12837	-4.07452	0.586875	-0.871994	0.618323	-1.74854	-2.88111	2.08948	-2.88374	-1.34711	0.774688	-0.232083	-1.76389	-2.28335	-0.765484	-1.02038	-1.99429	-0.748238	-3.73191	-5.16356
FGF10	1.13196	-0.646706	1.80994	1.34015	-0.0441903	-0.799453	3.33737	-1.29308	2.77853	3.59254	3.4143	0.129138	-1.08913	1.69349	-3.62814	-3.10614	2.57969	2.79522	-3.16836	0.216262	0.941076	2.19026	-0.169508	0.945705	-2.67028	-1.89381
GATA3	2.33599	0.0884944	0.20838	0.931433	1.95555	0.194062	0.922023	4.68412	-0.861314	-1.49541	0.253953	3.1971	-0.721608	-0.293371	-2.91102	-4.59779	-1.87667	2.95962	-1.48065	2.01091	-0.947523	-0.227804	-1.11069	-0.242827	-0.408053	-1.61438
TLR7	1.91924	-0.830719	1.52457	-1.05877	-2.27346	-2.31132	2.0341	-1.53016	-0.247486	1.85696	1.40466	0.497474	-2.52978	-0.559501	-0.461376	-1.10174	-2.70716	3.625	-5.30717	-0.239507	0.539829	1.01381	-4.47871	-1.1082	-2.62194	-2.83924
RBMS3	-0.330726	-0.540115	-0.113753	-1.15118	-1.83148	-3.42941	1.75156	-3.51759	0.949998	1.89311	1.91751	0.38744	-4.26728	0.982357	3.75917	3.1295	-0.23014	0.604887	-1.35183	-3.22282	-1.48071	-0.26141	-2.12645	-1.79292	-4.12156	-0.733884
MSLN	4.03133	4.46834	3.88256	2.5724	4.78422	5.01437	1.91651	6.00826	2.01086	1.38796	-0.807528	4.93036	4.83043	0.267128	4.02022	4.0124	3.71023	-1.1242	3.85935	3.5148	4.85276	3.72246	4.23884	3.90257	4.42982	4.55169
SLC39A8	4.62216	4.18623	3.0205	4.22114	4.82765	3.48111	1.81903	4.47928	2.01259	3.1431	0.885434	5.06197	3.5664	2.3561	-2.40724	-2.79677	0.389919	0.368936	1.81768	5.40604	1.8805	1.79674	0.855878	2.34564	2.77253	3.05126
CCL2	6.09394	5.74916	8.79165	6.4815	5.66267	4.74538	9.3273	4.09009	6.89766	8.78345	6.21859	5.34842	3.46459	5.77228	7.03861	7.52584	2.85626	8.6139	1.00383	5.22303	6.89914	8.44769	1.32829	6.64465	4.91386	5.47868
C5AR1	1.01162	2.64456	4.4779	3.05301	1.4091	1.01898	6.02838	3.16162	4.50118	6.07979	1.87066	3.29803	0.450211	4.05774	1.99917	1.18477	-0.316194	2.76741	-2.40977	3.16486	2.57344	3.26729	-2.52125	2.00496	0.182324	3.53798
KRBA1	-0.423261	-3.84918	-1.53195	-0.52378	-0.964466	-2.71741	0.966881	-3.88055	0.768197	-0.794172	0.292452	-0.0258878	-5.15379	0.648815	0.469917	0.574654	-0.656547	1.472	-4.61078	-1.90668	-3.06599	-1.58301	-1.80205	-3.42445	-4.07583	-5.83158
CLEC2D	3.42903	-0.102932	2.49517	0.562328	1.81513	-0.648643	1.93401	-0.865222	1.08582	-0.931057	1.02979	-2.1392	-0.561818	-1.63011	-3.19323	-1.25676	-0.19594	6.20565	-2.07978	0.710605	1.76066	4.15088	0.0970714	1.29473	-0.681784	0.0258793
NR1H4	2.6461	3.34449	1.61832	-0.0231613	1.26037	-0.20531	2.73401	-1.43147	0.708496	1.73661	3.09496	0.368735	3.14533	2.29645	-2.60902	-2.2715	3.27336	0.594061	4.02919	0.229465	4.71414	3.42656	3.88683	3.81202	4.77238	3.55391
TSPAN11	-0.602462	-0.797726	1.57112	0.169258	-2.04572	-1.79828	3.82007	0.67267	3.24598	3.06807	3.53902	1.59925	-1.56427	2.76753	4.35196	3.19642	1.99311	2.17366	-0.260078	-0.274648	1.67281	2.93759	-0.940598	-0.129115	-2.47716	-2.02565
P3H2	-1.87316	-0.621701	-0.391189	-1.01045	-0.295344	-1.56628	1.56845	0.0785962	2.92886	2.10722	3.34498	1.44275	-2.05158	2.66755	-0.133882	-1.4584	4.39696	-1.06927	0.207606	-0.614845	0.157923	-0.714889	0.168604	-1.27525	-4.744	-1.40868
BCO2	0.555914	0.429054	0.937201	-2.79499	-4.94813	1.58998	1.5873	-4.88254	0.195146	0.435138	1.35588	0.531519	2.29694	-0.0675291	-1.00875	-0.093953	2.62284	1.42536	3.11889	-1.22724	2.34941	1.265	3.24184	1.23369	-0.248142	2.49889
RAB31	3.31501	2.51023	3.61584	3.60294	2.22186	1.49975	6.224	1.37173	6.4537	6.58366	6.41754	5.70983	1.34513	5.00009	6.28224	5.38993	3.27161	4.53207	0.276818	2.13525	3.11395	4.9156	0.846682	2.67981	-1.01496	2.4569
BAIAP2L1	4.06459	4.33026	4.06941	4.69832	4.16151	4.29411	1.75667	5.16686	2.06278	4.53796	3.41497	5.32559	4.12227	2.58622	-1.57849	-3.43021	4.12011	1.73999	5.26689	5.02639	4.70509	3.72702	4.91036	3.88376	4.31753	5.18053
GYG2	-0.0658398	-0.149668	0.502137	-0.0909796	0.474504	-1.72212	1.46523	-0.0432162	-1.16553	-0.0483018	-4.36388	-0.896711	0.941384	-1.57744	-4.6205	-6.06137	1.2813	-0.297263	1.25157	-0.959382	0.928139	-0.697093	1.75204	-3.11255	-4.68109	-1.81321
SDC1	6.37941	6.77706	6.48621	7.16413	6.90878	6.24944	4.42201	7.26491	3.79353	6.64348	5.56843	6.36071	6.49822	4.98726	1.7502	-0.00700974	6.92813	4.37921	6.90699	7.1275	6.71376	5.54136	7.36658	6.21895	6.76511	5.53269
FFAR2	-0.103406	3.29535	5.28971	3.89196	2.23952	1.54184	4.66505	2.96789	5.22138	6.63269	1.19578	2.48786	2.65781	5.33878	-1.11136	-0.628147	0.486241	1.72462	-1.2888	3.60619	2.60185	3.32583	0.237919	2.4449	0.802003	4.08739
SLC1A1	5.56208	6.84839	5.73762	6.24009	5.86713	4.51186	3.13134	6.64808	2.31959	5.88457	3.91379	3.96368	6.63656	5.15357	0.149285	-0.680745	5.17189	2.00824	5.39665	6.84305	6.00593	4.43188	5.7536	7.31679	4.83266	4.50792
ELN	1.94357	3.06183	4.0651	2.5947	1.26386	1.50393	5.94193	0.805912	4.33448	5.37918	5.06559	4.41766	1.88285	4.4688	-0.917949	-3.57179	2.90234	3.2115	-0.185433	1.82252	4.48992	4.32366	1.93333	2.89058	0.745418	1.79022
TFCP2L1	1.19068	1.92827	3.05207	2.72541	1.64397	2.75652	0.425846	2.6151	1.97758	4.22534	-2.46416	2.32203	1.97969	0.797038	-2.14051	-3.08534	3.28853	-0.760504	5.53061	3.49333	3.04807	1.4209	4.29193	1.2849	1.01175	2.72284
PHLDB2	3.31817	2.75425	2.07355	2.73782	2.74249	1.40197	4.10667	3.72176	5.73739	5.03323	3.99039	3.79092	2.79383	4.74742	-2.08451	-2.94398	3.76733	0.858451	0.426297	2.78772	2.08966	2.27672	2.3368	1.79046	1.38239	-1.02965
RGS5	0.784822	2.51665	2.02999	2.10813	0.142766	2.08231	4.77684	-0.082695	4.84416	3.83768	5.13596	2.27496	-0.859797	4.51147	2.56162	2.03403	5.38195	2.15224	0.296099	1.27935	1.79203	1.6055	2.27412	1.86734	-0.346206	1.17463
MXRA8	2.03595	2.1844	3.18933	2.73266	1.16275	1.44598	5.55982	0.423159	4.04777	5.5436	5.79757	5.09121	0.285805	4.48909	8.12694	6.58914	2.7273	3.71389	0.226102	1.34906	3.89795	4.92445	1.94165	2.92141	1.27407	0.686335
NUGGC	2.11975	-2.56681	0.0656275	-4.43639	-4.87559	-4.67989	-3.10712	-5.7784	-4.86044	-3.59879	-3.43198	-6.19119	-5.50339	-5.66439	-4.32252	-2.95126	-2.78852	0.116804	-2.88054	-2.73364	-3.92291	-0.255284	-1.44765	-3.05323	-4.39586	-4.89162
DIXDC1	1.06234	-0.197916	0.632343	0.126801	-0.0569729	0.647388	3.25581	1.07557	5.49144	3.54251	3.27692	2.00289	-0.668315	4.39139	1.89311	1.48696	3.41065	2.62724	-1.58901	0.413388	1.43272	1.5549	0.421835	0.610407	-3.45564	-0.90548
ISG15	6.5739	4.22223	2.43189	5.62793	5.89843	3.47593	3.13565	4.45791	4.9115	0.257276	5.50972	3.44997	5.28174	5.04441	2.8251	3.18803	0.690086	4.28627	4.64965	5.31906	9.15361	6.45455	0.707366	6.54494	6.43787	3.74216
ANK3	1.14951	0.875914	0.51163	1.19161	1.46113	0.599594	-1.09842	2.14566	1.6429	0.414677	-1.92229	1.29144	1.31946	2.31556	-5.6201	-5.42759	2.57386	-1.3094	1.86723	1.53391	1.62686	0.120047	1.80611	1.27302	-0.301589	1.21904
ZNF703	5.59408	5.03454	3.86183	4.50223	4.6127	3.53036	4.4896	6.5855	2.24228	3.97481	3.91152	5.36189	5.66625	3.55425	-1.47339	-3.40625	4.84118	2.38467	4.49967	5.56535	3.95876	2.8794	4.51492	3.81927	4.80856	3.72066
TSPAN8	7.33582	7.88509	7.817	7.67957	7.07856	8.29513	5.09255	5.09118	4.66105	7.32568	7.17769	7.60806	8.4969	7.73793	1.213	1.19435	7.67488	5.4709	7.41506	7.24897	7.88447	7.41323	8.07825	8.59626	8.1155	8.3948
MEDAG	0.569792	1.05649	4.21849	3.52629	2.76554	2.23191	5.98153	5.99811	4.28036	4.22362	4.07214	3.21904	1.17381	3.22529	5.63975	6.45187	1.54424	2.21356	-1.70991	2.42643	3.11386	4.27569	0.865056	2.856	-0.973832	1.76529
FNBP1	3.42856	1.40081	2.89604	1.26141	0.2566	0.460103	4.459	0.546976	5.81223	4.41941	3.99325	1.73514	-1.01853	5.15779	5.29099	4.17852	4.79621	4.64238	0.0196735	2.27971	2.7736	2.81156	1.84834	1.15002	-0.997754	0.516086
SOBP	1.93554	1.52891	0.154765	2.82146	2.69056	1.54353	2.20157	3.63968	1.80063	2.50512	1.99474	2.79714	0.418859	1.3034	-4.84128	-4.75305	0.376368	1.00071	-1.3404	3.96559	-0.222116	0.063572	-0.949645	-0.117431	0.284408	0.357529
PHKG1	-1.8674	-1.80715	-0.72188	-2.54037	-2.25649	-2.2537	-0.333256	-4.88622	2.81913	0.786981	0.27478	-1.46276	-4.63984	1.5533	-5.08707	-2.67058	1.7349	-1.75014	-2.18129	-1.98995	-0.306514	-1.888	-0.835991	-1.44644	-3.54814	-2.73358
SLC2A4	0.14909	-0.63127	-0.62023	-1.52727	-0.551996	-0.983227	1.41572	-0.857762	4.3675	3.05186	2.97182	-0.780302	0.12923	3.78188	0.286952	-0.72716	4.55089	-1.48597	-0.0767702	-0.357236	1.84815	-1.18208	1.17123	-0.527729	-1.46446	-2.04928
JAKMIP1	-0.0584024	1.71983	-0.542961	-2.48646	-2.18786	0.547183	-1.84707	-2.99078	-4.80509	-2.32459	-0.676579	-1.71515	1.72313	-1.46768	0.477812	0.163112	-2.28644	-1.03316	-4.36912	-2.88537	-4.37663	-2.62311	-2.46267	1.26692	1.81512	2.12717
TTLL7	-1.43186	-2.02813	-1.30155	-2.28066	-2.71092	-3.39739	-0.0306767	-3.61496	3.32118	1.00485	0.658481	-1.73827	-3.59471	2.76845	0.0762718	-0.313945	1.89839	-1.61002	-0.197355	-3.25523	-0.573246	-0.281723	0.36793	-1.20709	-2.46456	-1.87109
SLAMF6	2.55389	-0.237627	1.90856	-0.649713	-0.230634	-1.45526	1.40077	-1.79118	0.346236	-1.02603	0.346566	-2.52517	-2.88648	-2.41103	-1.68671	-3.10113	-2.279	4.65695	-2.89873	0.497801	0.214112	1.91088	-0.467843	0.331006	-2.76642	-1.95845
HMCN1	-1.52988	-3.48262	-0.638748	-3.47257	-2.40632	-5.06658	-0.171669	0.25718	-1.38565	-1.03291	-0.226623	-3.64545	-3.99684	-1.14077	-5.76714	-6.251	-0.60717	-1.35396	-4.12453	-3.90368	-1.24663	0.130246	-0.749288	-2.42477	-5.08309	-6.31901
LOX	-0.0565812	2.30446	2.70724	2.08828	0.834315	0.0818032	6.64626	0.580994	3.59112	4.23512	4.43572	2.70943	-0.0485405	3.27052	2.09878	0.346066	0.771911	1.77591	-4.21507	0.696403	1.54095	3.15769	-0.623836	0.954345	-0.383959	0.590271
RGS11	-0.0527378	-2.91178	-0.366563	1.88781	2.18204	-0.531663	1.99023	1.03488	1.7744	0.876487	2.02573	3.25768	-0.552956	2.05822	4.17576	4.45489	1.2623	1.60269	-1.0954	2.4214	-2.88222	-2.95345	-0.574663	-0.564414	-1.64048	-1.45165
HAVCR1	1.69546	2.20194	3.35795	2.62292	1.10135	1.87606	5.01348	1.07237	3.99183	5.19036	3.95764	2.56634	0.15514	2.97979	2.94972	2.57322	-0.688457	4.20789	-3.91464	2.39214	2.25335	3.81983	-1.83406	1.97202	-0.777027	2.02962
TMEM246	-1.08458	0.176157	-0.86564	-2.89201	-1.34772	-1.67429	0.113714	-3.67433	4.55814	2.17986	2.58809	-1.23718	0.138382	2.88271	0.908021	0.00485371	2.3883	0.798872	-0.805348	-2.54813	0.423567	-1.65918	-0.108237	0.671746	-2.36149	-0.805038
VCAN	0.258893	1.4244	3.17467	2.41956	0.759156	0.359206	5.48027	0.967847	3.93106	5.26364	5.1895	4.17481	-0.0883452	3.19771	4.82745	3.41683	0.149806	1.87661	-2.86249	1.53438	2.22707	3.68333	0.075957	1.65213	-0.836481	1.61134
BAIAP3	-0.644176	-5.34157	-0.37219	-1.99604	-1.42055	-1.40586	0.314047	-1.57072	-0.0835784	-3.25317	-2.528	-2.08346	-1.83072	-1.66605	3.57616	3.64657	-1.38759	2.43667	-2.21445	-1.81627	-4.30758	-3.7848	-1.31562	-2.13245	-2.74271	-1.67865
CXorf36	-1.72881	-2.28023	-0.109359	-1.2212	-5.61295	-4.40745	2.28459	-2.62234	0.679126	1.58467	1.38249	-0.653566	-3.63886	1.11092	-1.99701	-3.9429	0.513268	0.0807259	-1.78694	-1.56719	-1.74711	-1.30677	-1.33131	-1.6941	-5.10013	-3.1678
GPRC5A	4.15006	2.13637	3.77232	4.32451	3.13113	1.88491	4.92985	6.05847	1.44021	4.71578	3.19197	4.98943	3.43255	2.47673	-1.22194	-1.33836	3.93536	2.50581	5.87788	4.00492	5.33921	4.52618	4.50837	3.21845	0.32262	4.05898
LPAR1	2.67924	0.850791	2.93986	0.892375	-0.772969	-1.86513	4.88908	-1.75526	3.63323	3.54773	3.40246	1.88181	1.94452	2.83477	6.1428	5.15294	3.72299	3.87708	4.93367	0.832469	3.90877	3.04929	3.88485	1.91763	-0.59131	0.761643
FAP	0.991441	1.26355	3.35231	2.91223	1.46415	0.677621	5.86919	0.653354	3.85671	4.95486	4.75287	3.71918	0.523712	4.0275	7.07513	6.28441	0.885176	3.60558	-0.520087	1.74216	3.77499	4.68276	0.495501	2.45108	0.120113	1.14557
TMEM74B	2.71515	4.19963	3.31755	1.41987	1.67351	-2.90251	0.50016	2.20735	-1.27028	1.11735	-0.509541	2.65798	2.77926	2.05814	-3.14346	-3.12509	-0.0953071	1.23179	-0.397173	2.31378	1.55192	1.71536	1.06503	2.95811	2.89512	4.42188
MISP	5.67613	5.54003	5.82617	5.17918	4.60586	4.9167	3.35048	5.60422	3.26391	4.83545	4.34386	5.25753	5.62869	4.12252	-0.617032	-1.3424	6.09779	2.33046	7.60712	5.53874	7.26901	4.97994	6.64731	5.11749	5.95603	5.07304
CRABP2	0.680126	0.979579	2.12051	1.59773	0.541336	0.950506	4.68468	-1.89696	2.22178	2.09266	4.80877	2.80403	0.957766	2.74105	7.39779	6.42161	0.573811	2.40963	0.0234115	1.22145	2.55191	3.39423	0.891061	1.51599	0.000836521	1.25994
PLAC8	5.2493	3.93582	5.70235	6.07456	5.62311	6.40542	3.67232	3.10345	4.16865	4.41118	5.04922	4.78457	5.97774	4.82685	-0.501373	-0.608892	6.21953	6.83866	6.45853	6.12075	7.07629	6.53502	6.86026	5.7821	5.94609	6.66253
TENM4	-1.02228	-1.02033	-2.24283	-1.83286	-1.93828	-1.72074	0.202399	0.149454	-1.4623	-0.183058	0.126986	-2.06687	-1.72073	-1.77336	-6.04635	-7.90927	-2.14541	-0.245244	-4.42578	-1.64394	-2.72479	-2.62391	-2.74629	-3.44194	-5.45975	-6.40185
CPT1C	-4.63596	-4.29653	-1.90282	-2.34378	-2.40431	-3.89198	1.50681	-4.36502	0.263876	0.547785	-0.939936	-1.18958	-3.39924	0.898154	1.88243	1.87997	-2.0336	-0.965505	-2.96894	-2.94647	-1.45136	-1.22468	-4.94634	-2.64967	-2.76843	-5.16651
MID1	-0.562067	-3.43136	0.0787464	-0.339416	0.441961	-2.21478	1.74746	0.335506	2.45963	0.569034	2.03396	0.254062	0.342065	1.89786	-1.55594	-3.18645	2.16127	0.474794	1.30301	-1.86219	0.424342	-0.454119	1.36196	-2.40008	-4.00986	-4.75563
ACOT11	2.08156	1.461	-1.45431	0.958472	1.14588	1.53459	-1.08098	2.68238	0.91695	-0.0329052	-0.0768356	-0.230029	0.939129	1.73778	-4.0044	-5.13761	2.55939	-1.27164	2.74079	2.00503	1.66493	-0.544336	2.51179	0.0477617	0.30991	0.267752
B3GALT2	1.54191	2.18469	3.35262	0.170886	-0.854017	3.99574	2.71622	-2.92895	3.03507	4.93081	-0.0340259	2.33493	3.33745	3.06025	3.7484	3.43425	5.71656	3.06583	5.97471	1.97424	5.0813	3.70793	6.10795	2.73964	3.14315	3.36973
HRH2	-2.39575	-0.573469	1.36953	-1.66179	-2.27402	-2.719	3.91109	-0.85348	1.61238	2.58517	2.27797	0.629053	-3.42451	0.498649	3.41948	1.82209	1.15374	1.38096	-0.624119	-1.62014	0.395743	1.19332	1.82397	-1.38818	-1.98921	-1.99537
CRYAB	1.94678	0.903563	2.81837	0.386513	1.34479	0.0794566	3.6684	-0.0579532	6.07981	4.65468	4.7082	2.31541	1.82691	5.29846	1.04439	1.52045	5.27186	2.49372	1.48221	0.696065	4.48722	2.3581	2.51475	1.45603	-0.245097	0.715155
SERPINA1	4.07986	5.56793	7.18086	5.66884	3.94531	5.45555	5.07355	3.72816	6.75324	6.53216	4.25656	5.08949	7.41	6.07865	-0.678319	-1.31932	5.49222	4.44151	5.54525	5.69614	6.58511	6.28531	6.15335	5.27777	4.21691	5.65575
TNFSF11	2.70546	3.76067	2.92005	4.50508	3.47818	1.07572	0.293724	3.76159	-1.79527	4.36583	0.718219	-0.158125	2.15438	1.67553	1.53203	0.791114	-0.433746	3.80652	-2.19687	2.38515	1.38282	3.80872	-1.07626	2.75191	1.56697	3.24117
MYCL	2.08886	2.4513	1.46984	4.26155	4.5649	2.70574	0.657494	4.28577	-1.19024	3.42145	2.36577	2.5863	5.18512	1.03137	-1.73621	-2.0469	-0.38157	1.25481	1.08298	4.32579	0.865499	-0.504014	1.1115	2.11241	2.07571	1.7655
MILR1	2.40675	1.25625	2.44469	2.29838	2.0098	1.45244	4.37608	0.769704	3.7735	4.00268	3.65078	1.45587	0.53079	2.59532	2.26796	3.68862	-1.5879	5.25042	-3.24878	2.12718	2.46016	4.20512	-2.84032	1.76229	0.98378	1.80618
ADGRG5	-0.665523	-4.00648	-1.70358	-2.24124	-2.6308	-3.42268	-0.214399	-3.06744	-1.46128	-2.82055	0.390459	-4.23899	-5.53717	-2.71787	0.816436	-0.33867	-6.08902	1.83852	-3.22222	-1.20748	-1.95548	-0.892526	-4.82581	-2.32966	-5.41713	-4.9955
PLD4	3.55275	-0.500491	2.657	0.555767	0.224016	-0.792742	3.05423	-0.926152	-0.293576	0.880701	2.61332	-1.69495	-1.26081	-1.53103	1.93557	0.734014	-1.59972	5.25651	-2.14017	-0.418119	1.8991	1.22045	-1.68715	0.247065	-2.62287	-1.08359
NPL	-0.891777	-0.871195	-0.132568	-0.400852	-1.57343	-0.395485	3.11829	-2.18677	2.78349	0.897155	1.50962	0.982167	-2.3243	1.27591	3.42931	3.155	0.263503	1.88334	-3.04376	-0.684399	0.745616	1.56463	-2.45008	-0.747359	-3.07152	-1.32528
CLIC5	0.364113	2.12592	1.29077	-3.72437	-1.66447	-0.453228	1.92197	-2.49665	2.8675	0.0100923	1.97775	-0.832347	1.47354	0.0855334	-1.08931	-1.25033	2.50164	2.00549	5.05693	1.128	4.01201	1.91556	3.79145	0.796739	1.04554	2.26322
HVCN1	4.84407	1.95026	3.42919	1.88338	0.542734	0.848109	5.02695	1.18042	4.277	4.6049	3.86131	3.34334	0.791247	3.66381	3.37568	2.47957	2.63841	6.4443	-3.19902	1.65719	2.78563	3.57037	0.398307	1.58039	-0.805845	1.21183
SH2D1A	2.26366	-1.6754	1.70897	-1.05985	-1.48242	-2.44059	2.58091	-1.17757	0.725349	-0.574401	-0.0599325	-2.23122	-3.91907	-0.865797	-1.87538	-1.19257	-2.63438	4.544	-3.70898	-0.550921	0.276151	1.31921	-2.94982	-0.693453	-2.42474	-0.460062
SLC27A6	-0.787446	1.74609	-0.0180626	-1.80743	-3.72743	-2.55222	2.101	-3.32716	1.41246	1.00297	2.31835	1.04756	-2.8444	1.69086	0.383829	0.0426443	1.71842	1.41256	-2.69239	-3.5186	1.17348	0.116671	1.37837	0.528471	-3.70141	0.249737
TMEM79	0.62114	0.953496	0.260604	0.684612	0.851943	0.749491	-3.76315	1.58916	-3.15705	-0.87148	-1.77465	1.40389	1.06645	-2.68667	-3.65243	-4.25321	-1.96022	-5.10101	-2.13454	2.09377	-1.20072	-1.73855	-1.28294	0.507576	0.950998	-0.127635
FAM64A	1.395	0.611616	-0.142685	2.11121	3.58389	0.474607	1.70471	2.47692	-1.7935	1.04944	0.231408	0.772274	2.6777	-0.437664	1.49923	0.701975	-2.16616	0.477501	-3.52769	2.7153	-0.516984	1.57998	-4.45248	0.244388	-1.181	-1.83385
PRUNE2	1.69147	3.42888	1.02942	0.748942	0.943329	0.891668	0.533563	1.47094	5.77959	2.91187	3.81881	1.83446	1.32954	4.58508	-3.63636	-1.7763	4.30553	0.385276	2.78723	0.56954	2.36501	1.77613	3.253	2.67172	1.65865	2.51316
IL3RA	-0.11172	-5.01202	0.721793	-1.23124	-1.47315	-3.03421	2.31093	-3.45478	0.886004	-0.0742451	-0.822552	0.036876	-4.85112	1.22925	-2.99064	-4.22261	-2.08406	0.118825	-1.732	-0.649394	-1.02546	-1.64906	-3.11876	-0.970896	-3.10704	-5.28023
DUSP4	1.91558	3.55157	4.42758	3.82092	2.63022	3.2839	3.47493	5.37015	1.4518	5.51464	1.75699	3.12446	2.65404	2.58347	-2.5229	-2.65468	-0.00585188	2.71655	-0.338052	2.75485	1.03164	3.07872	0.0558481	1.95873	0.12148	2.09634
GPR132	1.14313	-1.10692	1.23728	-1.20765	-2.40946	-1.24704	1.71504	-0.732519	0.246335	0.466966	-0.676764	-3.83385	-3.82127	-1.45928	-3.06059	-3.83468	-2.12973	3.4734	-2.72052	-0.856283	0.0328343	-0.108226	-2.58072	-1.08552	-5.29386	-1.57073
LPAR3	-0.380673	-2.03036	-1.40538	-1.5041	-1.16131	-3.37022	-0.166483	-1.53485	-0.30907	-1.25285	0.221914	-1.34671	-0.919768	-3.73314	1.71782	0.921657	2.44899	0.0126116	4.79699	0.300241	2.74237	-0.174965	2.83077	-2.17393	-3.51349	-2.17793
KCNG3	-1.54663	0.0631025	-3.93503	-4.98892	-1.81796	-1.85297	-2.23945	-4.16124	-4.67819	-0.0240177	-1.01296	-0.673394	-2.5634	-1.91965	4.1477	2.42243	-3.54158	-1.49915	-1.05707	-3.19568	-1.09849	-1.96511	-2.02922	-0.315036	-2.39713	-0.241542
LYZ	4.98305	4.17895	6.53729	4.69113	3.6392	3.2034	7.9962	4.26261	6.86455	8.55645	6.6671	5.60992	3.0124	6.05688	5.7427	5.30493	2.88131	9.54373	1.28623	4.53787	6.04344	6.51713	1.51532	4.72291	1.89887	5.21092
MYH10	0.99279	0.259158	1.35922	1.08919	0.610029	-0.557353	3.94943	1.54342	4.11478	2.83141	3.75708	2.48391	0.580242	3.43626	-1.84344	-4.4544	1.54541	0.578794	-2.00677	1.65332	0.873837	1.06674	0.305095	0.52714	-1.57297	-1.45865
PLEKHA4	-0.163061	-1.64689	0.353515	0.750795	0.470407	-1.4786	3.14205	-1.65704	1.76785	2.1914	3.2368	1.1607	-3.03674	2.16409	4.6943	3.85698	0.229046	0.874868	-1.37776	0.944356	0.437941	1.0538	-1.22375	0.201734	-1.96282	-3.62534
ITGA5	2.23951	3.74407	3.79447	3.28789	1.72968	1.28325	6.04143	2.11933	7.89356	6.6556	4.67059	4.47826	1.13652	7.00845	4.85494	4.41236	5.86329	3.57947	1.47226	2.80533	4.10239	3.52743	2.32776	2.11029	1.58276	2.69026
RASGRF2	-1.5793	0.406373	-0.848552	-2.36881	-4.93106	-3.40123	2.3524	-4.49888	-0.224941	1.91729	1.34011	-0.258838	0.449852	-0.517226	0.901703	0.339514	1.00067	0.739926	2.52676	-2.45704	1.08075	1.50701	1.33112	-0.0409614	-0.17524	-3.86333
ZC4H2	3.38557	1.7186	3.42921	-0.0491673	1.29489	3.73685	1.46673	-5.1275	2.03456	3.21841	3.26937	1.44177	-1.20969	3.08125	2.2681	1.70689	2.88993	1.60579	2.84497	3.41596	3.425	2.46019	3.07568	3.7583	-1.20253	-1.28289
PDZK1IP1	6.78382	5.88974	4.81253	4.87673	6.42321	6.78904	4.55497	6.6568	4.36288	3.86239	2.77645	6.30701	6.2894	5.23194	1.36139	1.33246	7.02111	3.07085	8.21636	6.64849	7.75174	5.12109	7.59172	6.03595	5.94677	5.93935
CMPK2	3.36828	1.78331	0.103128	3.37107	2.37807	-1.18429	1.36701	1.39697	2.22287	-1.56374	2.31423	1.61002	2.06493	2.97598	1.2249	-0.609414	-2.82999	1.61809	-0.840652	3.29562	6.01834	2.86492	-1.98615	2.61819	2.99652	1.89984
HK3	-1.86167	-1.8075	0.232894	-1.12521	-2.08004	-1.72971	2.32309	-2.10202	2.59535	3.20327	0.554176	2.06986	-2.64711	1.02377	-2.84018	-3.01137	-3.18156	1.25462	-4.39049	-0.699686	-0.605503	1.02557	-2.94223	-1.19208	-2.54282	-0.338924
TSPAN5	4.81918	3.83457	1.68234	5.17878	6.20257	4.05595	1.31928	5.96876	1.88211	1.92095	1.78659	5.56904	6.0396	1.6014	4.84579	4.10406	1.30655	3.08666	-1.39966	4.84945	0.82907	1.52861	0.0308163	2.88876	2.51173	1.30407
ICOS	2.60255	0.851743	0.932409	0.0070663	0.381593	-1.43894	2.02881	0.373732	0.544673	0.324016	1.25553	-3.23221	-2.43956	-0.16171	-2.26026	-3.92366	-2.39822	4.73075	-3.07512	2.0156	-0.434247	1.5103	-0.46749	0.549847	-0.385922	0.785442
MATK	-0.99174	0.0117675	1.4785	-0.310295	-0.778556	-0.517767	3.44491	-3.1148	2.23355	4.46713	1.69458	2.73565	-0.809327	1.92278	2.11152	1.56519	-1.01331	3.49189	-2.89722	-1.68342	1.88758	2.67338	0.00351589	-0.474589	-1.87816	-0.988937
PTX3	-0.362117	0.867216	4.67189	-0.854375	0.197488	-1.22022	6.93361	-2.2136	1.78503	-0.77836	3.70787	2.38578	-0.622776	-0.152147	2.19163	1.63765	0.0405558	2.98326	-0.229098	-0.19269	1.71202	0.542872	-0.334298	0.545019	-0.500042	1.29359
PYGM	-0.837942	-3.01612	-1.49898	-2.4255	-3.52624	-4.02643	-1.13026	-4.07826	1.70066	-1.04347	-0.397015	-4.19159	-4.40157	1.07681	-3.57969	-1.62662	1.13702	-0.638798	-4.63251	-2.8522	-2.49543	-2.72694	-1.54675	-1.72305	-3.71688	-3.91462
GPC3	1.57554	2.63668	4.37818	0.783675	-1.09861	4.02872	3.70374	-1.34487	1.80968	4.334	3.16827	0.713889	3.38797	2.74842	6.3866	4.69486	2.94758	2.56537	2.17453	-0.371264	3.77223	3.64342	3.50157	4.24681	2.81791	3.37446
TCAF1	-0.0491658	-1.46083	0.848221	-1.36759	-0.00966373	-1.59301	3.21781	-2.75978	2.55494	2.84474	2.17921	0.254993	-2.24575	2.48375	2.71442	1.02827	2.53387	0.31632	-0.301636	-2.11128	1.63491	0.950998	0.607588	-1.03748	-3.45035	-3.07243
ARMCX2	-0.333214	-0.782491	-1.43928	-0.9838	-1.69025	-1.21842	2.04665	-3.25278	2.61235	1.90956	2.57171	-0.716372	-2.62039	3.09111	-1.85648	-3.31696	1.90266	0.0418037	-1.37253	-2.19332	0.639408	0.0688771	-1.13464	-1.28373	-1.92569	-3.04876
MICU3	0.846722	-2.01002	0.946776	2.03916	3.05234	0.806382	1.0554	3.23459	1.37409	1.51479	0.692963	1.97944	-0.241697	1.35502	0.974801	0.188008	1.18539	-0.104079	-4.68396	0.933754	-0.792117	-0.337718	-2.7878	-2.4486	-2.89872	-3.09248
GLI1	-1.25396	-0.622043	-1.03685	-0.542906	-1.11058	-1.13357	2.46584	-0.933474	-1.3691	0.859977	3.26391	1.01833	-2.30674	1.02329	5.29572	4.87267	-1.08834	0.962431	-1.08547	-0.731937	-0.601011	0.856826	-1.2879	-0.472681	-1.86141	-2.26442
PTCH2	-1.026	0.918409	1.46077	1.41412	0.699578	0.843317	2.23078	-0.325796	0.346043	1.47503	3.60771	1.2818	1.01895	1.69111	4.45551	4.30569	-3.73455	0.39102	-4.47076	0.983152	-1.13836	0.0864441	-1.45955	-0.0572776	0.569792	1.3212
ITGA2	4.25227	5.41285	4.66747	4.8627	3.15568	4.99267	2.06227	5.06841	2.83193	5.47007	2.88957	4.65002	3.43061	3.68041	-0.743323	-1.66278	3.71675	0.545415	4.29843	5.31904	3.89567	3.46514	4.49777	4.06337	3.17051	4.57572
AP3B2	-1.36839	-2.61574	-1.0311	-3.29152	-1.56811	-1.3329	-0.380942	-3.91449	-0.225209	-0.485206	-2.41667	-4.4336	-1.32386	-0.845142	3.12792	2.0127	-2.11314	-1.04637	-3.82423	-1.65435	-2.54396	-3.49037	-2.78075	-3.05716	-4.45234	-6.13413
GRB14	1.36153	0.342464	-0.457187	0.585049	0.909435	0.885707	1.68941	-1.46532	3.66047	2.31399	0.833133	0.845936	-2.08248	2.02878	-0.252451	-1.32406	1.45105	1.47873	-4.48999	0.441972	-0.462153	0.161746	-1.5789	0.721373	-2.45457	3.64432
CD3D	2.29228	-0.848022	0.93739	-1.04485	0.0192037	-1.68707	1.39975	-1.2061	0.402548	-0.756073	0.195789	-3.91338	-1.93697	-2.40543	-3.99474	-2.08864	-0.125793	4.81537	-0.704752	0.428325	1.23179	2.14374	0.630564	0.177293	-0.865188	-0.532954
B4GALNT4	2.31727	-0.140366	-0.331993	1.75602	3.00327	-0.928388	-0.760551	4.93918	-1.28243	-0.420304	-2.98674	3.02505	1.74955	1.39271	0.585097	0.141838	-1.80011	-0.16463	-1.56331	2.78569	-2.6197	-1.75902	-0.638557	-1.16702	-1.26803	-1.78499
PLS1	4.45656	4.51153	4.69407	4.92809	5.12024	4.96034	2.80542	4.02696	3.70942	4.4691	3.83635	4.34912	5.50288	3.67133	0.520417	0.792531	6.51328	3.43568	7.99611	4.99379	7.6068	5.63561	7.35877	5.42745	5.04772	5.56642
TRIM29	-2.20009	0.38712	-0.268784	0.874254	-0.462034	-1.81415	1.61806	-2.35497	-4.51674	0.950222	-0.809193	-3.40176	0.142335	-3.44149	-3.81157	-2.34888	-0.704366	-0.156244	1.49744	0.534918	0.57599	-1.38193	-1.34972	-2.04464	-3.81074	0.298037
SLC37A2	3.75476	3.31167	3.08387	3.07621	3.11415	2.29429	5.04074	2.22555	3.19462	5.84225	5.22868	4.77384	1.39769	2.98469	2.68894	2.17436	-0.485285	5.45391	-1.79794	3.45056	3.21664	4.58235	-1.66469	1.98832	1.68546	1.14815
COL5A3	-0.417467	0.717438	0.422502	-0.491014	-1.89818	-1.67662	2.5638	-2.62789	1.22925	1.92243	1.67248	0.665466	-3.0261	1.49338	5.35317	4.16479	1.09048	-0.411658	-1.09004	-2.48905	0.246834	-0.209055	-0.155883	-1.11922	-1.96059	-1.02159
OLFML1	0.319699	-0.275954	1.65576	-0.117714	-2.21255	-2.12523	4.76687	-1.61064	1.93245	1.39415	2.77259	0.974375	-2.53824	1.92721	3.64728	2.04123	0.34476	2.33966	-1.14365	-1.19411	1.60914	1.70227	0.314267	-0.334851	-2.41198	-3.35153
IKZF1	3.67649	-0.113742	2.57577	0.728669	-0.59671	-0.976154	2.78472	0.422125	1.53627	2.27686	1.17666	0.364472	-2.86213	-0.642777	-1.62585	-2.3408	-2.04911	4.20823	-3.6915	0.774081	0.650994	1.07452	-0.485333	-0.199431	-1.76075	-0.435163
RASAL1	2.10158	-0.596464	-0.187272	1.16037	0.764533	2.05573	0.128254	0.730349	-2.34832	-0.796816	2.44685	1.36991	-0.0914991	-0.348153	-1.94366	-2.24806	-3.8567	2.52604	-4.10147	2.25468	-1.71469	-0.598031	-2.12099	-0.524907	-2.10457	-0.620381
PLCH1	0.67007	2.72771	1.7708	2.51985	1.92969	1.98981	-1.52545	1.84201	-0.797952	1.45814	1.10203	1.62061	1.77522	0.635067	-3.38567	-4.61195	1.664	-2.43298	2.54891	2.34195	1.73607	0.231396	2.32086	1.12731	1.82106	1.66312
FOXP3	-0.57909	-1.61961	-0.95513	-2.98622	-4.22086	-3.09519	1.1629	-2.58097	-3.44584	-2.18391	0.448013	-1.7272	-4.36373	-2.27836	-3.84278	-3.15474	-4.92648	2.19583	-2.67656	-1.64874	-1.46375	0.103531	-4.06833	-2.09033	-3.66893	-5.87091
AKT3	0.885348	0.351413	1.58053	0.461633	0.689263	-1.60799	4.17469	-0.0931371	5.32135	4.09092	4.26247	2.6199	-0.909656	4.09246	3.15324	2.61782	3.16516	2.97958	-0.158843	1.22026	1.74752	2.53043	1.15936	0.610048	-1.7641	0.254763
HSPA12B	0.6107	-1.08446	1.32751	-0.660295	-1.44167	-2.91549	3.75018	-2.86456	1.73516	3.7061	2.68222	1.11205	-0.781375	2.92547	3.90321	2.15505	1.88667	1.81254	0.20068	-0.423248	1.80814	1.31405	0.427177	0.508571	-2.56472	-2.41375
DLL1	2.10849	3.30744	2.80041	3.90385	1.98888	3.46594	2.63284	2.98323	1.36195	3.3338	2.64617	2.27277	3.35291	1.23789	-3.86284	-4.83413	1.85122	2.36327	1.87745	3.85023	1.23816	1.64554	2.26213	2.42635	2.0991	3.09265
AHCYL2	2.30243	1.06727	2.2365	1.21663	1.7031	1.41761	2.52797	0.34686	3.82662	3.02363	2.09333	2.73191	3.40425	1.9496	1.24387	0.656908	6.24096	3.23014	8.299	2.84705	6.61475	3.98278	6.92643	3.42277	1.92186	2.57233
SLC35F2	4.47403	4.74331	4.2529	4.93909	4.13894	4.2288	2.54275	5.10411	1.84516	3.99815	2.96408	4.0792	4.82799	3.7741	-0.859674	-2.97075	4.545	2.17953	5.46741	4.95758	4.97544	3.76668	5.23694	4.25681	3.67784	4.98411
SGCE	0.190362	0.221085	1.27043	0.457689	-0.363681	-0.958143	4.14907	-1.16173	3.11907	2.93674	2.97638	1.11823	-2.5065	2.71602	4.19853	3.72552	2.65686	2.57633	-0.737629	-1.03868	1.48603	1.9827	0.748478	0.657201	-2.90447	-0.865232
TRPS1	1.21155	-0.610462	-0.0589418	2.53425	2.46837	2.33295	2.49165	2.87254	2.95765	2.11377	1.82295	3.12925	0.491771	1.61589	-1.57772	-1.05088	0.486941	2.20978	-4.0218	3.51248	-1.37711	0.518686	-2.1168	0.567127	-2.43664	-0.527961
TMEM47	1.30612	1.85498	3.07739	2.0375	0.437824	0.128491	5.1378	-0.152563	5.02333	4.32893	4.45635	2.1325	-0.116676	5.00945	4.94958	3.75726	4.77902	2.04516	0.414817	0.364897	3.33113	2.74831	1.74158	1.70867	-1.24419	0.384061
STAC	-2.18695	-1.9295	-3.74134	-0.745863	-2.4783	-4.69932	0.3242	-5.79272	2.83346	1.19701	-1.82143	0.109989	-2.86301	-0.0417171	-3.33259	-3.40496	-0.179874	-3.23966	-3.46753	-2.07814	-2.35188	-0.524434	-3.07643	-2.01914	-3.109	-3.83008
TBKBP1	-0.774256	0.748092	-0.41693	-0.131067	-2.52788	-1.10893	2.32408	-3.23215	2.84823	1.7781	1.60555	0.829062	-1.69974	1.75933	-4.50628	-3.5203	1.34498	-0.146408	-0.348082	0.0760802	-0.458204	-2.22799	-0.228968	-0.593261	-0.77239	-3.54772
WISP3	0.202637	-0.0437783	-0.0879818	-2.63023	-3.58665	-1.37004	3.65444	0.604897	-0.20023	-0.323025	0.388818	-0.522118	1.25913	0.31105	3.46624	4.21978	-2.07322	-0.0741935	-2.20276	-3.01442	-2.22894	-0.883909	-3.4107	-0.834622	0.249397	1.52262
BANK1	2.59792	-1.63802	1.9571	-2.0789	-2.53404	-2.17925	2.91774	-2.85368	1.82922	0.42811	2.21554	-0.0845908	-2.41959	0.772772	-1.80508	-1.40603	0.00466678	4.79521	-0.519332	-1.32072	0.983933	0.912029	-0.176896	0.559619	-2.653	-1.99061
MGST1	6.66125	6.72846	5.821	6.49659	7.23089	6.25005	5.63384	0.616292	3.68334	5.88783	5.85893	5.17001	6.62043	6.54991	0.693525	2.21274	6.73578	4.83942	5.60404	6.47269	6.81564	6.05048	7.35557	7.97164	5.96529	5.75353
ROR1	-0.621189	-3.18789	0.20593	-0.999305	-1.13123	-1.99483	2.16132	-1.15906	1.99156	0.614766	2.76114	0.323762	-3.94552	1.22285	2.86299	1.31351	1.31825	0.782325	-1.72072	-1.02517	0.278913	0.661522	-1.2609	-1.85487	-4.78185	-1.53284
RPS21	7.391	5.47568	4.35399	6.85925	7.57484	7.72003	3.78376	6.80842	0.473704	2.10947	6.36182	6.04238	6.03737	5.98213	6.71335	8.3721	5.85291	7.85181	1.84522	3.61811	6.55649	6.55775	5.74768	7.61389	8.62815	6.24396
PDE1B	-0.916701	-0.543898	-1.52726	-0.164265	-2.2173	-3.97736	0.132314	-4.33784	2.61221	2.73641	-0.547793	-0.900153	-3.7363	1.94967	2.299	1.23654	0.924548	-1.41278	-2.81004	-1.74717	0.413497	0.262746	-2.29982	-1.22164	-2.16564	-1.71934
CREB3L1	3.8128	5.14487	5.89936	5.33801	4.24662	4.94181	5.37699	5.93062	3.6241	4.63559	4.71722	5.34296	5.014	3.68032	-0.574399	-3.15357	4.57014	1.80838	4.51451	5.84649	4.53088	4.59735	5.06658	3.60609	4.53321	3.91022
FBXO32	1.95167	0.951386	1.198	0.861185	1.73059	2.18844	1.90999	0.910779	6.8269	5.10305	3.77867	2.79231	2.06633	5.88639	-0.92042	-0.541696	5.13484	2.00755	1.51682	0.755144	1.34835	2.33739	1.52205	2.35656	0.79023	1.88098
PLS3	1.88905	2.56471	3.47071	2.25327	1.71254	0.608346	6.49997	0.42634	4.10441	5.04608	5.77799	3.81569	0.136716	4.26878	7.40561	6.27736	3.04267	3.79353	1.12923	1.09822	3.70363	4.08291	1.84234	2.51989	0.172705	1.46949
CD163	0.454629	2.19633	2.06424	1.54971	-0.868258	0.762876	5.8124	0.220776	4.38216	4.48039	2.63188	4.30405	-1.26527	2.73559	2.37328	1.99969	1.10859	1.63647	-3.27572	0.891015	2.09714	2.73302	-1.3868	0.581216	-0.0988207	-0.10885
LYVE1	0.870842	1.14497	3.7404	1.47714	0.59031	-1.11504	7.27806	-0.773136	4.44569	4.09837	2.38273	2.24939	-0.872348	2.12057	2.16236	2.8428	3.36934	3.33129	0.62742	-0.67376	3.3071	1.92958	2.18974	2.61335	-0.647908	0.501495
EFEMP2	2.10012	1.89059	3.45485	2.51077	0.917669	1.25143	6.07465	1.08201	6.00959	4.71626	6.1328	3.88607	-0.24406	5.30389	4.76649	3.30624	5.07131	4.01091	0.399401	1.66613	3.83885	4.20052	2.53711	2.35469	-0.0020443	0.617402
TERT	0.437835	1.28065	-0.654406	0.379188	-0.633793	-0.395369	-3.85718	-1.52971	-4.62879	0.0313105	-3.58285	1.2422	-1.68846	0.590865	-2.52292	-4.48961	-4.06525	-0.457449	-3.35693	0.891155	-3.13694	-1.02041	-1.46984	-1.33725	-4.90776	0.550586
KLRD1	-1.45843	-2.89313	0.126709	-1.7589	-2.34824	-0.0981565	2.53576	-1.62221	0.354949	0.211536	-0.692905	-3.54881	-1.37589	0.357833	-1.24747	0.717517	1.51949	3.2923	0.574034	-1.27925	1.78041	2.07651	1.45707	0.545672	-4.95656	-1.90788
SH3RF3	0.41122	1.23489	-0.391923	1.76311	0.82594	1.80373	1.79518	2.61626	2.86208	2.22531	2.03427	1.89022	0.0704168	2.32692	-4.3327	-3.94821	1.73821	0.2288	-2.57488	2.5871	-0.589559	-0.785393	-1.16823	-0.0260861	0.831772	-0.590349
MTSS1L	0.214249	-0.695253	0.478361	0.195121	-0.823856	-0.00106799	1.88835	-0.98985	4.33513	3.02722	3.98709	0.8828	-1.96075	3.79049	1.73869	0.818098	3.46464	0.844185	-0.164884	0.544149	0.702782	0.516378	0.86309	-0.412643	-2.59702	-1.44552
DUSP22	1.34113	-2.36091	0.803591	-1.20965	-0.0189409	-2.42254	2.03385	0.126101	3.75424	1.89697	2.34478	0.887642	-2.9449	2.62565	2.82993	2.02494	1.71426	1.52279	-1.87819	-0.0759761	1.0279	1.18191	-1.78119	0.463078	-3.41064	-1.24303
COL1A1	5.18602	7.31851	7.07684	7.41995	5.23925	5.39656	11.6133	5.58372	7.92654	9.23986	10.7833	9.85589	3.63953	8.04758	8.73753	6.84711	5.37879	6.96159	4.49898	5.62451	7.23945	8.33416	5.00468	5.66925	4.45874	5.62576
LRRC8E	1.77128	2.02981	0.733962	2.12641	1.93704	1.99015	-1.2064	3.22465	-2.39124	1.15928	-0.74597	1.86119	1.87726	-1.6308	2.50927	1.80151	-0.271263	-2.92037	0.847925	2.92171	0.312259	0.0434705	0.296534	0.319225	0.575419	1.44934
CD68	3.50393	2.97538	3.12124	2.35153	2.25781	2.08501	5.70523	2.13524	4.65438	6.83953	4.3403	5.01108	1.27212	3.70096	3.56294	3.28143	0.0318892	5.5098	-1.72292	3.1348	3.24725	4.26787	-1.57905	1.9605	1.70466	2.26373
GALNT3	3.70652	4.85103	3.53851	4.28357	3.86903	3.25787	2.58719	4.29238	1.54288	3.99814	1.78815	4.66895	4.78657	3.42777	-1.75468	-2.91427	2.3423	1.84881	2.51088	4.19041	2.83866	2.69763	2.73912	4.37539	3.8325	4.54518
METTL7B	2.75868	1.4605	2.13301	1.27322	1.78062	1.24403	-0.410745	-0.545222	1.44015	1.37801	1.26529	0.102685	1.4195	0.890937	-1.63811	-1.20292	4.30562	-0.829842	5.31252	2.1369	5.51839	2.35692	4.78615	2.76418	2.43301	1.13674
PRKCZ	2.46481	3.28953	2.86721	2.95057	2.53706	2.56204	1.29334	3.18516	1.37077	2.05949	1.30994	3.02827	3.56371	1.90497	-2.23499	-5.18195	3.81685	1.75025	4.55986	3.5326	4.10355	2.09592	4.27025	3.05752	2.85489	2.51804
FIBIN	0.338259	1.22833	2.65986	-1.01012	-1.13443	2.20272	3.12629	-1.37553	4.70047	5.23684	1.90996	3.07618	-0.154912	2.77216	3.5756	1.71001	4.72893	-0.242094	1.30829	1.22048	2.05592	2.51089	0.827315	0.817885	-0.518943	1.94786
IL2RG	2.88997	-0.136402	1.9519	-1.07236	-1.20306	-1.59749	2.25757	-0.51976	1.67065	3.33615	1.41547	0.698539	-1.57454	0.352646	-1.06144	-1.32519	-1.04011	5.09832	-2.66818	0.573578	1.69189	2.61387	-0.768482	0.0511215	-1.96516	-0.114947
P4HA3	0.705889	-0.618227	0.75558	1.2063	0.757331	-1.76297	2.73173	0.786722	3.09343	2.55104	4.52988	1.91103	-0.907489	1.83984	4.8631	4.19559	1.05056	2.00621	-2.49141	0.465295	0.818908	2.67699	-1.84029	0.990512	-2.69026	0.405001
PRICKLE2	-1.83649	-1.48172	-0.0453555	-1.38938	-0.463503	-1.07028	3.36087	0.680189	3.34843	1.68617	1.48952	-0.770658	-2.50478	2.68916	1.77211	0.270074	1.74612	-1.28556	-2.01729	-1.22694	-0.730349	-0.864544	-0.720317	-1.64298	-3.98717	-1.68087
CHAC1	3.46558	5.16215	5.27619	5.23316	3.91887	3.29102	1.70258	4.29455	-0.349399	4.54897	1.85121	4.42243	3.97848	2.98729	1.69349	1.66357	-1.0696	2.32376	0.256757	3.58854	1.58104	2.64034	-0.708899	3.92458	3.48413	5.2584
SPSB4	0.90998	1.07051	-1.79522	1.82441	2.38641	-0.837444	0.323312	0.190349	-3.9781	-0.496055	1.76953	0.935354	0.0992548	-0.303481	-1.89004	-3.27362	-2.72332	-1.25587	-2.13675	2.29768	-1.94702	-0.820616	-2.76247	-0.649193	1.04699	0.664911
WASF1	-1.51676	-0.281905	-2.5208	1.29361	0.860192	-3.0795	1.11755	1.54173	2.76049	1.26257	1.15332	0.992464	0.531129	1.81993	-1.58985	-2.37476	1.68327	-1.65504	-3.57481	1.36767	-1.34939	-1.26039	-0.861015	-0.913238	-2.77041	-3.93441
BCAT1	4.20474	4.34503	2.7974	2.94262	0.841273	-0.0268649	3.36161	3.27089	2.17069	5.02369	2.37587	2.64353	3.46258	2.31704	1.01463	0.0689597	-1.57816	3.04473	-2.14434	3.29189	1.16792	2.42655	-1.75159	3.42959	0.725663	0.160339
ARHGEF26	0.957892	2.3112	1.44599	0.810188	-0.829878	-0.45069	0.922715	1.48406	5.26367	3.30901	3.10147	0.927768	0.0244757	4.02411	4.58276	3.58024	4.4377	-0.457407	-0.21652	-1.56911	1.40634	0.418687	2.43457	-0.237488	0.571648	1.59491
ADGRE3	-1.99811	-0.155955	2.12073	2.08992	-1.543	-0.54311	1.6867	0.384879	3.1595	3.97492	1.54758	1.20227	-1.02951	3.22427	-2.14911	-3.4139	-1.27472	2.58622	-1.92164	1.63628	-0.397956	0.728913	-2.5611	0.741894	-0.309272	1.23012
RAB15	4.4295	5.59083	3.94619	5.20024	5.61706	4.14381	2.93951	6.06069	2.8568	4.10426	3.53027	5.33569	5.13306	2.23309	-0.230726	-0.228392	5.33107	2.63258	6.38793	6.29076	5.09033	3.32011	5.99548	5.0178	4.6353	4.3809
TBXA2R	-1.33722	-0.947907	-0.728723	-0.457607	-2.9587	-2.68731	2.08298	-0.984006	-1.04246	1.2914	0.947442	1.02831	-0.813976	0.158402	4.73787	3.23105	1.30062	2.48451	-1.84982	-1.50126	1.4988	-0.625525	-0.278463	-1.56847	-2.32952	-2.92112
PSD	-1.11421	-1.66952	-1.58457	0.196179	-1.57941	0.327204	0.167615	-1.16832	3.72642	0.91458	1.81892	-0.421676	-0.599639	2.70552	3.4084	3.5855	3.45902	-0.694352	-0.287452	-0.343418	-0.0144602	-1.0905	-0.288468	-1.62046	-0.10506	-2.28747
PRSS35	0.765713	1.08826	-0.343242	-0.401928	-0.703633	-2.41958	2.73243	-0.486701	0.341291	2.14053	4.7202	2.10071	1.75061	0.205017	5.59792	4.64848	-0.0918865	0.471666	1.519	-0.234445	1.60599	3.64635	-0.521941	0.266577	-0.325398	-0.822738
LAMA4	2.40428	4.06429	4.50391	3.46771	1.73533	1.76052	6.63399	1.90581	6.98206	6.93983	6.42845	4.51552	0.885184	6.24664	4.84464	3.49447	5.70945	4.03259	1.34356	2.30255	4.17101	4.49523	3.23285	2.64231	1.33997	2.1776
TRDC	-1.57486	0.156474	-0.472777	-2.747	-1.02146	-0.755342	-1.45583	2.12369	-0.410275	-0.277301	-2.75326	-3.04072	-0.194178	-1.26008	1.24067	1.26363	2.31438	1.62512	-1.02379	-0.839064	1.90741	0.403769	2.99736	-1.25489	-2.91584	-2.98232
L3MBTL4	-1.72469	-2.77816	-0.489143	0.10738	-1.1208	-2.32791	-0.939128	-1.95482	2.30454	1.10057	0.016211	-2.35666	-2.31785	0.383851	-6.01627	-3.53182	0.747147	-1.63264	-4.62242	-2.45489	-0.68035	-0.802837	-0.802749	-0.993008	-4.49625	-2.63779
TYROBP	3.6107	4.15594	5.35642	5.29327	4.08784	4.3917	7.2304	3.34078	7.11401	7.2565	6.76196	6.15564	3.50557	6.22113	5.44191	6.71074	2.13555	7.72525	0.459327	4.93232	5.16655	6.9132	-0.0683094	4.78853	3.56177	5.02583
PPFIA4	-1.64562	-4.7575	-1.8046	-2.78814	-2.27026	-2.01521	0.648585	-2.79812	1.14362	-0.29536	0.226102	-2.00914	-6.14214	0.196003	0.0656275	0.238322	-0.242434	-0.579385	-3.91115	-0.856782	-3.72119	-4.17166	-2.64201	-2.04535	-3.48416	-1.6739
DDX60	3.68787	1.43168	1.43583	0.870037	1.60685	1.4542	3.2122	-0.675669	3.28434	1.30742	3.75787	2.46254	3.09216	2.92509	-1.2911	-1.85042	0.190792	2.35603	2.94003	4.30588	5.98963	3.62705	0.386314	4.11269	3.62802	2.17393
MRAP2	-1.50712	-3.14132	-2.99554	-0.107032	2.01352	-4.15522	2.80072	-0.330995	0.88857	-0.462292	1.68137	-0.652015	-3.43701	-0.240427	0.301986	-0.014552	-2.21341	0.573685	-2.96309	-2.21108	-0.995322	-0.351089	-2.3403	-1.95128	-3.87683	-5.30792
CHDH	0.102215	3.5665	2.79973	-0.251178	-0.480241	1.07058	2.86321	-4.51614	3.22091	2.96647	3.31896	3.26614	-0.971063	2.4979	0.255948	-1.1223	3.39549	1.02053	3.54207	0.35347	3.20156	2.29836	3.80356	1.0838	2.07822	1.53591
CSRP1	5.29934	4.76975	5.89128	4.77182	4.84546	3.80036	7.47817	4.99759	10.2273	8.08516	8.10956	5.56228	4.72761	9.27172	7.7297	6.92456	9.45257	5.7684	4.25577	5.0016	6.67859	6.06543	6.03294	4.39293	3.65138	4.0798
DNAJC22	2.81993	4.31954	3.7778	3.05208	3.75171	0.5266	1.02368	2.88792	1.58859	3.20919	3.6005	0.473122	4.14796	3.29915	-1.5884	-0.51244	4.50873	3.26061	5.51948	1.78102	4.92651	4.05787	5.12672	4.40645	4.14691	3.55326
TOX	2.59585	3.54402	3.53242	3.06843	1.88249	3.68889	0.322643	2.73651	2.31077	1.95103	2.405	1.47133	3.5128	2.51561	-4.84211	-3.64056	2.96406	2.33979	2.56867	2.27537	2.86166	2.35231	2.53347	3.31511	3.54921	3.0015
SPARC	4.70158	6.30988	6.40696	6.34384	4.78249	4.57623	10.6396	4.405	8.22262	8.70721	10.2102	8.68867	3.83179	8.16279	9.22871	7.58436	6.52446	7.1059	4.40046	4.81937	7.26592	8.08973	4.8255	5.573	4.15414	5.09697
EHD2	2.21062	3.2306	3.91026	3.12841	1.46746	1.45067	6.4036	2.04845	6.61676	5.62036	6.08597	3.82484	1.25804	5.66677	7.46959	5.78427	5.49458	3.34721	1.97735	2.27194	4.69189	4.07728	3.28097	2.52574	0.906998	1.91133
AXIN2	5.77442	7.18755	3.97535	5.50865	5.99905	6.27047	2.76344	6.76534	2.38001	3.86602	2.95491	6.45693	6.51035	4.25893	1.16956	1.02603	2.66412	1.14888	4.61983	6.83864	2.55366	2.35491	3.49706	5.56103	6.3764	4.37157
CAV1	2.1878	4.19826	4.41885	5.28973	3.87206	2.43091	6.40824	6.58752	7.61026	6.5294	6.09315	6.94895	1.38985	6.53578	8.16991	7.27738	5.37742	3.47267	2.24992	3.29016	5.84453	4.79702	3.60107	3.37457	2.23659	2.90223
SH3BGRL	2.66987	1.14688	3.17038	2.51105	1.84959	2.94168	5.80995	-0.0202819	6.34762	4.67309	6.48919	3.60421	0.354509	5.7244	3.0084	4.5733	4.74552	5.65181	-0.34912	2.02911	3.9953	5.23561	2.9404	3.63725	1.68926	2.07338
ADAMTS2	0.70075	2.37421	2.40881	2.04099	-0.576469	-0.633522	5.25451	0.235825	2.67696	4.39376	4.83336	2.97384	-0.993161	2.98947	5.284	3.24421	0.079757	1.83457	-1.44006	0.648631	2.1608	3.30233	-0.356733	0.72034	-0.649989	0.445621
PIK3CG	0.780327	0.218918	1.15318	-0.210181	-0.950525	-0.910917	2.18487	-1.35922	1.24403	3.32662	1.03501	0.331419	-2.98826	0.971001	-1.13895	-1.85741	-3.29458	2.52656	-4.72941	0.114487	0.244692	2.01153	-2.04162	-1.37378	-2.45607	-0.33134
SLC16A1	4.95561	5.41319	5.42483	5.56268	4.70049	3.1928	3.46652	4.01249	4.65545	5.94805	5.69414	5.27803	5.96993	4.95958	-0.175333	-1.47836	6.55226	3.06931	7.38373	4.32283	6.91564	4.74839	7.28028	5.04042	5.39376	6.39997
ZNF677	-1.61974	-5.12259	-1.91603	-4.91323	-5.6745	-3.93814	-0.000819684	-4.66752	-0.613697	-1.59288	-0.888918	-1.80555	-0.779445	0.158789	0.346679	0.281431	-1.21257	1.4642	-2.41874	-3.1783	-2.26798	-1.93293	-1.53937	-3.77003	-2.05321	-5.59504
LGI4	-1.02895	-1.828	0.438495	-2.78063	-3.00066	-3.00796	1.99798	-3.98056	0.738102	1.05522	0.679622	0.20068	-3.79301	0.906729	2.5591	1.94703	0.676764	-0.69501	-1.47014	-3.36537	0.760809	-0.0524326	-1.23528	-1.59391	-2.94913	-2.65297
CARD11	2.40431	-1.17947	1.16007	0.599184	-0.840428	-2.34763	1.52786	-1.06263	0.210102	0.936365	-0.114213	-1.30307	-3.89654	-2.1964	-1.91661	-3.30615	-1.14392	3.70613	-2.25604	1.16247	-0.196042	0.789904	-0.350793	-0.829147	-3.53892	-1.3783
ENPEP	2.67091	3.88283	4.31113	3.36729	2.96768	0.266924	3.15021	2.43632	2.20097	2.59013	4.63325	3.76352	3.62764	3.1259	-1.64843	-2.09125	4.95542	3.63865	7.02649	2.85999	5.5021	2.58337	5.58128	4.66278	3.15648	4.40244
CORO2B	0.770973	-3.85893	0.448732	0.190678	0.609169	0.577934	2.7171	1.60013	0.643828	0.840363	2.51248	0.696448	-2.44834	0.714083	2.01665	1.02171	0.153235	0.70558	-1.75451	-0.132991	-0.254487	0.164297	-0.365494	-1.12246	-5.14952	-4.74798
PALMD	-0.225352	0.0100637	1.63988	-0.106832	-3.00887	-0.025017	3.66181	-1.4314	2.79657	1.94312	2.23022	-0.309499	-2.43496	2.53269	3.29203	3.68847	2.36104	0.518072	-0.495915	-0.533111	1.08321	0.49173	-0.0592439	0.428571	-2.08247	-0.857435
FBN1	1.15244	2.56925	3.12284	2.82775	1.35609	0.349897	5.80387	1.42722	3.50051	5.12609	5.61373	4.84694	0.158932	3.85094	6.87967	6.01272	2.06986	3.16925	-0.222976	1.19975	2.63435	3.96627	1.40399	2.14174	0.277782	0.795917
TGFB1I1	2.13327	2.1992	3.54258	1.97778	0.583105	1.45553	4.95663	-0.475952	6.60495	5.30973	5.9087	3.34471	1.45718	5.59994	5.78474	4.30776	5.87785	2.61803	2.63455	1.59383	4.81417	3.85762	3.4636	1.76969	1.4712	2.77769
RRAD	3.83242	3.8903	4.0166	2.99712	2.93019	0.49679	1.75456	-2.33693	4.06718	3.27926	4.82108	3.20432	2.26279	3.43327	-0.508053	-0.811133	4.31378	3.7185	1.25205	1.31839	2.9873	3.21227	1.73922	3.04977	-1.2875	1.89795
CLIP3	0.897798	-0.140555	1.2965	0.203377	-0.567906	-1.16541	2.74485	-0.676891	4.0865	2.97291	3.01239	1.29835	-0.942121	3.22434	4.32976	2.98193	2.42344	0.969314	-1.26327	-0.870588	1.65795	0.518334	0.324212	-0.812199	-3.15821	-1.64414
IGF2	1.42841	-0.795849	3.68745	0.269919	2.05025	-1.5857	6.29433	-0.286623	-0.0972858	2.63062	1.40868	0.77915	-2.94142	3.40254	1.90219	0.596353	1.37601	3.7172	-1.29393	-0.453283	1.44762	0.668473	1.3076	1.65852	-0.782705	-1.45026
ADD2	-0.736014	-2.93691	-1.45873	-1.41064	-2.56261	-5.3	-3.18123	-1.47556	-0.574214	0.446976	-2.67183	-0.830121	-3.03874	-1.46956	3.07667	1.74162	-1.47513	-2.32313	-4.37696	1.62683	-3.18081	-2.29397	-2.12213	-2.38699	-3.36967	-4.59574
KDF1	2.31606	2.69033	2.01655	2.76178	2.82276	2.13981	-0.23897	2.88061	-0.277188	1.36609	1.24512	2.49899	3.20946	1.60715	-3.2963	-2.67524	2.06828	0.213801	2.56777	3.1448	2.32066	1.28488	2.62456	2.51479	2.98612	2.26363
TNFRSF11B	1.79548	3.58381	3.60236	3.9844	2.97296	3.92158	2.25759	1.01605	0.414828	5.04426	0.899013	2.29011	2.29973	2.82311	-0.0541961	1.00381	-0.371392	3.79945	-3.17033	1.42607	2.36726	2.22759	-1.67997	2.66788	3.79152	4.81084
CD7	1.60119	-1.94318	1.80771	-1.46147	-0.0269237	0.567672	2.93971	-0.576998	2.17529	-0.374963	0.579142	-3.12591	-1.36224	-0.274639	-1.84403	0.177344	2.89342	5.04531	1.24077	1.32499	2.89726	1.801	3.37007	0.813147	-1.26627	2.28803
AKAP2	3.17689	2.53083	4.08868	2.54805	0.876786	1.16231	5.50736	1.84938	6.107	5.04511	4.17053	2.73437	0.818785	5.21511	0.114354	-1.36713	4.67071	3.57925	4.26823	1.98839	3.50317	3.01361	4.03027	1.478	-0.311481	1.09119
ATP2C2	2.20323	3.65885	4.14704	3.17341	1.83208	3.79816	0.575264	2.13491	1.24618	2.04841	1.09202	1.68293	3.96532	1.3543	-2.79053	-2.52981	3.8908	0.746141	3.93859	2.64804	4.23942	2.85378	4.43904	2.71138	2.7852	3.23118
SMARCD3	0.200718	-0.677239	0.0941955	0.0897151	-1.38334	-1.40931	2.57989	-1.41421	4.08677	2.26012	3.13368	0.930995	-1.32495	2.83989	2.24129	1.58084	3.52174	1.09593	-0.900465	-1.32697	1.89905	1.43083	0.781679	0.261374	-2.40892	-2.37186
CNDP1	1.86322	4.26882	2.51642	0.204516	0.171463	1.57336	1.08649	-1.25384	0.219574	3.1705	3.1015	0.801473	2.7902	0.418589	-0.606825	-1.1361	3.81629	0.627308	3.91469	-0.185412	3.23068	1.70556	4.4112	3.51508	2.53846	3.2731
ENTPD3	3.72964	4.79322	3.96317	4.59307	3.77543	2.05288	2.27847	5.23897	2.29812	4.81116	0.302816	3.45006	3.1444	2.41767	-2.47546	-2.27943	1.32534	3.65804	1.7998	3.17876	2.94275	3.03797	1.41596	2.54688	4.0388	1.49355
TNIP3	0.00509812	2.93757	2.65498	1.33535	-1.00995	-0.847362	-1.44868	-0.100295	-0.671294	2.46949	-3.01065	-3.0596	0.942301	3.27626	-1.83703	-1.9938	-1.87144	0.932704	0.95158	0.579885	0.55339	1.79724	-0.538216	0.692552	0.977133	0.559276
HPGD	2.86401	2.34961	2.03275	1.537	2.12461	3.46193	2.28805	0.823676	3.2692	1.78821	1.89044	3.75709	4.78401	1.40933	-2.2747	-2.10613	4.91611	2.94116	6.00336	2.40537	5.3934	3.64379	5.1648	3.4524	3.31249	4.4788
ARG2	5.36181	3.69773	2.31105	5.88172	7.33264	5.28094	3.60494	7.13966	2.82031	3.91581	3.1759	5.49694	5.22238	5.12744	3.17676	4.23632	0.803053	3.21619	0.435842	5.09464	1.16024	3.12041	0.83607	4.67253	4.79675	3.00452
TSHZ3	-1.05751	-0.114074	0.475645	-0.191933	-1.3614	-2.75305	2.67804	-0.623287	3.38747	2.30668	2.19179	0.295876	-3.72342	2.12434	2.77587	2.11469	1.46083	0.0503972	-1.53234	-0.729316	-0.0616992	-0.0816428	-0.899076	-1.86056	-2.20431	-2.33431
NCS1	2.2698	1.973	0.679352	1.38054	1.29951	-2.45724	2.0051	0.169566	4.26678	2.08302	3.32379	1.34358	1.9023	3.95618	3.73931	2.78755	4.02415	0.134458	-1.36141	1.88661	1.35979	-1.33965	-2.60025	1.4796	-0.567363	1.32765
GPR34	2.19016	1.52129	2.47836	2.14557	0.763505	2.32676	5.8255	1.05504	3.57166	3.26205	4.63281	3.81832	-1.65637	2.70047	3.71902	3.47368	0.988492	4.97411	-2.47985	2.4272	2.94797	4.24905	-0.692567	2.12624	-0.459058	1.10462
CALCRL	-0.0888576	1.04164	2.12067	1.66618	0.438825	0.0435965	3.56808	-1.57631	2.39715	3.74829	4.61988	1.84291	-1.57016	3.10469	6.1254	5.60702	1.24378	2.83159	1.42952	0.515702	2.90446	3.17636	0.737618	1.8398	-0.535898	-0.411266
SCD5	0.175991	-0.397937	1.60213	0.944679	-0.309923	-2.21395	0.416213	4.03719	2.12414	2.25546	2.22637	0.341337	-2.20593	1.15674	-1.25251	-2.85581	1.50651	0.744178	-2.50351	2.74529	2.01277	1.89449	-0.181059	-0.631008	-3.16964	-2.9887
SCN1B	-1.31559	-1.23453	-0.0262139	-0.000702764	-1.22445	-1.90891	3.16807	0.413204	1.49829	1.13894	2.45609	1.11781	-1.67958	1.09475	5.56262	4.27122	0.575574	0.731279	-1.54523	-1.29811	0.769619	0.89834	-0.953238	-0.402857	-3.16378	-1.26455
PVRL3	5.1311	5.71925	5.10119	6.95687	5.52112	6.26293	4.34321	4.69436	2.971	5.71906	4.55664	6.3424	6.22547	5.8795	0.432981	-1.21664	4.10921	2.30855	5.54548	5.89043	5.3075	4.49916	4.67011	6.0309	6.27609	6.34314
SLC2A6	1.3203	0.298459	1.18901	-1.07518	-0.202479	-0.804826	2.45348	-0.0448807	1.2219	4.01893	0.552239	0.549354	-2.29482	0.551393	2.66026	1.40351	-2.54509	2.42454	-3.31002	0.846738	0.496207	0.714962	-2.6669	-1.21332	-2.77665	-1.39841
IGFBP3	3.169	4.80205	4.43016	4.06854	2.60505	-3.31871	4.74396	1.88128	1.68083	7.28736	1.82766	3.12294	2.72848	3.60997	1.58591	1.18881	0.875237	2.57636	-0.497926	2.31924	1.83569	2.57003	1.92213	1.40588	2.1474	3.30713
CXCR6	-0.618582	-0.383061	0.874876	-1.20916	-0.745428	-0.881895	2.93574	0.0187623	1.98775	0.578861	1.4206	-3.24249	-2.52707	-2.05383	-1.99096	-0.518811	1.05622	3.2324	-0.725386	2.24721	1.46377	1.78786	1.63658	-0.306143	-3.41011	1.87641
CD3E	4.48109	1.64473	4.06098	0.688816	1.63331	1.04636	4.53498	1.03978	3.37415	1.63692	2.98107	-1.10688	0.0782682	1.27264	-0.26081	-0.422422	3.00328	7.07217	2.16342	3.40541	4.25064	3.85636	3.65877	2.13581	1.11351	2.90825
ITK	1.1151	-1.42886	0.980186	-1.58309	1.36265	-2.13111	2.58563	-1.43422	0.963112	-0.994681	-0.435046	-2.86887	-2.15301	-1.81905	-2.92118	-3.2621	-0.0936343	4.30963	-1.49815	0.366879	0.565412	0.761192	0.52717	-0.636255	-3.51461	0.10829
CGNL1	0.124937	0.820673	0.657	0.685169	0.476973	0.592043	4.59982	2.65381	1.32531	2.42009	4.57219	2.62606	0.225991	1.90502	5.60964	4.25361	-0.43683	1.68108	-2.03473	1.24199	0.0127117	2.69964	-1.01775	1.31444	-1.60897	0.160288
SPOCK2	5.3793	0.537485	3.76285	-1.14829	-0.444084	-0.685545	3.50854	-0.00462547	1.69979	0.968916	1.88678	-1.11217	-1.91377	1.65752	0.912619	-1.16618	1.91209	5.85825	-0.824385	0.762306	1.98004	2.57049	1.0071	1.32165	-0.914276	0.742317
CLEC2B	0.604527	-1.2031	-0.025315	-1.48152	-1.44932	-2.61223	0.77257	-1.56256	0.329043	-1.33093	-0.0486047	-2.41581	-5.73302	-2.44866	-2.36675	-1.56452	-1.82851	3.80322	-2.79035	-0.72785	0.1627	1.4348	-1.55722	-0.704025	-3.53605	-1.30087
CSPG4	-0.632168	1.44873	0.729957	-0.148636	-1.35337	-2.05723	0.888359	-1.91702	3.6422	2.77669	2.43098	0.924191	-3.40492	3.02655	2.09828	0.685142	2.5705	-2.61716	-1.09459	-0.757677	0.396751	0.516893	-0.544323	-1.11938	-1.54157	-0.935876
USP43	2.9998	3.95425	3.16748	3.8583	3.13333	2.90989	1.02974	4.29823	0.981984	3.07708	0.707463	2.72535	2.98218	2.01785	-2.10928	-3.27959	3.21645	-0.191117	4.49121	4.25397	2.72596	2.43733	3.96671	2.49475	3.08201	2.65994
KCNJ8	-0.532633	0.499996	0.136244	-1.64926	-1.90423	-0.321775	2.42501	-2.80838	3.99939	3.24918	2.52614	1.77575	-0.620388	2.22141	-2.16756	-2.89566	1.87813	0.537584	-2.4072	-1.74441	1.46324	1.36208	-0.878306	0.971339	-0.447218	0.0589814
MALL	3.94466	1.47764	3.27599	3.96496	4.63173	1.65512	3.3492	3.73691	2.63998	4.1077	2.60503	4.67403	3.56791	3.30345	-0.52287	-1.67342	5.27943	1.84022	7.25153	4.05704	6.97288	4.08816	5.9181	3.57862	2.35095	2.74687
CSF2RA	-0.822159	-0.339962	1.41492	1.59714	0.410504	-0.184838	2.74022	0.208542	2.4133	3.51958	0.757552	-0.584399	-1.39609	2.00544	-0.128491	0.0166532	-3.12317	1.51526	-3.76714	1.21396	-1.3656	0.961557	-4.52038	-0.528813	-1.95141	1.42944
PRKCB	3.77068	0.935188	2.8211	0.904688	-0.313386	-0.484316	3.24145	-0.57881	4.5917	3.30526	2.67532	0.458865	-1.14203	3.97141	-0.405008	-0.66807	2.95447	4.99138	-0.524212	0.888827	1.38122	2.58923	0.38531	0.589064	-2.2492	0.91624
ZNF548	0.0637652	-3.51688	-0.305063	-2.0885	-1.74281	0.0148409	1.0667	-5.94506	1.36733	1.17189	0.694319	-1.72033	-3.70373	1.22472	2.14581	2.17159	0.547361	1.64833	-0.74725	-1.84583	-0.126239	-0.14834	-0.236084	-1.39991	-0.688585	-2.59931
GRIK4	-1.59929	-0.799717	-2.4661	-5.73642	-0.442656	-2.46788	-4.96432	-1.47176	-5.70812	0.244741	-5.43956	-4.97506	-0.839735	-2.79505	-0.118514	-1.45955	-5.19209	-5.09962	-3.82416	-1.60967	-4.74928	-2.56389	-4.93911	0.0547374	-2.3588	-2.26387
PAPSS2	6.47235	6.5076	6.19343	4.96893	4.85569	5.4726	5.26586	5.61489	4.62866	6.65527	5.12959	5.17958	7.78761	4.20646	6.70396	4.91794	8.80611	4.45159	8.85583	5.99594	8.86974	6.24969	9.41138	5.49307	7.32714	6.20101
SLC7A2	0.970935	-0.125543	-1.6238	-0.170629	-2.2266	-3.03699	2.23618	-2.31881	2.46342	0.461832	1.31088	1.75566	-2.47852	0.223571	2.53719	1.30767	-0.351772	-2.17778	-2.43624	0.0172948	-0.784622	-0.893606	-2.31311	-1.58939	-4.32888	-3.22617
CCDC109B	3.60453	-0.666258	2.07417	0.445684	0.798424	-0.782189	3.73671	-1.8564	3.89186	2.49249	3.15876	0.611153	-0.67226	2.19257	-0.446604	0.244546	1.78828	5.27431	-1.68968	-0.53862	2.36886	3.03785	0.805433	1.35712	-1.00596	0.235396
CDH3	2.26753	2.88571	2.43025	2.05227	2.89675	0.0212096	-0.768781	4.82577	-0.156688	2.89669	-2.49172	3.3192	3.81446	0.966807	0.0066499	-2.43658	1.44949	-1.05599	0.972502	0.69909	1.19499	0.593449	2.09602	1.99417	-0.836942	1.39948
HOXB6	4.77104	4.30033	1.65716	3.32406	2.5825	5.15905	3.01811	2.31385	3.30286	3.79464	3.11862	4.32889	4.08319	3.80462	-0.0200508	-1.17969	4.22571	2.4796	5.06582	4.45616	1.28728	1.04849	4.74393	4.92085	5.40681	1.62589
ARHGAP44	0.0651449	-1.87163	-1.1054	1.84724	1.55189	-0.989825	-0.218449	2.22207	1.98839	1.53788	0.662634	0.955588	0.225818	0.895225	0.784219	0.102053	1.7244	-0.464262	-3.20871	2.38585	-1.29155	-2.55123	-1.61965	-1.69419	-3.92457	-3.87938
LIPG	2.75606	2.34857	3.51794	3.23124	2.12541	3.59444	0.348946	3.3371	1.02186	4.07534	0.310573	3.75152	3.07292	1.36147	-2.24772	-3.94041	2.60143	1.31067	2.8366	2.60705	3.06938	1.52527	3.02466	3.29622	2.26053	2.23886
FGL1	-2.99842	-2.30206	-2.48973	-3.59827	-3.37915	-2.77691	2.04068	-5.80681	-3.7006	-0.158982	-1.57489	-1.93838	-4.26061	-1.098	1.41863	3.1813	-0.479355	-0.485135	-1.7347	-2.50762	-1.73616	-1.236	-0.745183	-1.86379	-2.85399	-2.59699
COPZ2	1.24157	0.921246	2.92039	1.94373	1.47562	1.13692	6.77348	-0.376897	5.05296	3.89678	6.34405	3.68569	0.432404	4.96358	3.02798	3.28641	3.75341	4.0449	1.6383	1.3791	3.71627	4.35732	1.76624	2.703	0.317883	0.765976
CCDC8	0.132472	-0.45651	-0.327415	-0.305266	0.108451	0.467186	4.59989	-3.07186	2.30625	1.16426	4.24903	3.22055	-1.25561	2.41091	0.956376	-1.69055	0.732781	1.93234	-1.59977	0.285769	0.543397	1.57407	-1.05332	-0.500634	-2.76082	-1.76466
PTPRR	2.487	0.118413	2.65505	0.20823	-0.932896	0.335518	0.332874	-1.23302	1.24705	0.629856	-0.110706	1.00514	3.75212	0.0808486	3.24273	2.91033	3.68205	2.23109	5.68831	1.69575	5.03501	3.79918	4.1631	1.51783	-1.92195	2.14008
CA9	1.14362	3.44168	2.58346	2.61293	2.40923	0.851615	-2.99674	0.528851	0.688923	2.82371	1.91854	3.13927	4.7345	2.22903	0.864794	1.2278	1.04807	-0.439307	0.375423	0.418136	2.19327	-0.630977	0.400844	4.06404	3.52628	4.41662
RDH16	-3.11952	0.667165	-2.31232	-3.42628	-2.28954	-2.62628	-1.95347	-2.78641	-0.880439	-2.3683	-2.21042	-1.70399	-0.587401	-0.222623	-1.87347	-2.35244	-0.053874	-0.632204	-5.26691	-1.31205	-3.85661	-3.80985	-5.38034	-2.55572	0.637007	-3.55714
A1CF	0.567409	1.66682	1.56737	1.02668	0.456459	0.88811	0.0621632	0.744161	-0.546945	1.22313	0.83161	-0.214868	1.90213	0.673086	-4.48006	-5.30987	2.42922	-0.4477	3.42813	1.13737	2.49385	0.423879	3.07177	1.25917	1.90372	1.56457
CD8A	-0.39965	0.586241	1.361	-0.629983	-0.515062	-0.470693	2.48525	-0.652584	2.27073	1.45118	-0.338524	-2.8139	-1.03903	0.069441	-3.53516	-0.322778	1.38681	4.36113	-1.42176	2.2552	2.3834	1.22712	1.79018	-1.17675	-0.918543	1.51787
MPEG1	3.08365	4.03114	3.6482	3.19394	1.61187	3.0384	5.88199	2.14053	4.29168	5.9808	5.7217	4.47319	0.875458	3.37893	4.14236	2.84477	-0.18067	5.0245	-0.699736	3.48761	3.62756	4.27622	-0.602142	1.92197	0.0996453	2.01791
PRDM1	4.47873	5.13304	3.72671	4.61404	4.7265	1.94011	2.76551	6.05735	2.2979	5.08016	2.56108	2.68128	3.91314	2.71673	-0.589401	-1.83679	1.72314	2.67105	5.08397	4.92166	3.00654	4.0895	2.44936	2.81199	2.17219	2.84693
CHRM3	1.29692	1.30685	2.04482	3.62799	3.34578	2.31173	-1.91017	-0.00452851	2.13941	2.49017	1.77089	2.43068	2.17589	2.23838	-2.71309	-3.93627	2.18232	0.472113	1.45113	3.76028	2.00993	1.71497	2.17811	1.2627	-2.11047	2.1412
PDE10A	0.49212	-0.149261	1.6399	2.56916	1.28812	1.47836	1.09918	2.98734	0.548101	2.57343	1.60765	3.11235	0.282143	1.69348	-3.23805	-3.40196	-0.36001	-1.02303	-3.13085	2.80127	-0.85493	0.218657	-2.65262	0.435586	-1.72572	1.51
TCEA2	0.845936	-1.29835	1.08425	0.52084	0.678144	1.96778	3.00243	0.02084	3.0658	1.85611	3.75627	1.43288	-0.0768706	2.01607	6.25107	6.79378	2.61411	2.31343	-0.760003	0.873309	1.38629	1.2597	0.535675	0.939851	0.00483933	-1.34699
CD53	5.8662	2.55331	4.04788	2.52164	2.11601	0.986083	5.65497	1.03601	4.54812	4.96234	4.10386	3.44792	1.36286	3.22455	3.05449	3.01875	1.87926	7.4542	-0.409462	3.17136	4.0508	4.81832	2.10518	2.80886	-1.23669	2.30738
PLEKHH2	-2.68283	-2.44763	-1.98928	-1.93931	-2.47846	-2.87026	0.44925	-4.49447	0.453902	0.0935196	0.138644	-1.776	-4.03433	0.0652276	2.49821	1.91742	-0.574328	-0.995661	-4.65501	-1.59181	-1.52278	-1.62479	-2.30759	-2.02465	-3.89356	-4.50038
RBM47	5.47971	5.13613	5.04321	4.9626	4.48767	5.32849	3.3875	4.95881	3.18748	4.53187	3.88965	5.16274	5.48246	3.59242	-0.812904	-1.70612	5.63784	3.47738	6.22079	5.01228	5.82745	4.5775	6.14821	4.9993	5.20136	5.41333
ADAMTSL3	0.423686	-0.447011	0.109481	-3.80548	-4.58393	0.639149	0.60576	-3.45645	2.35831	1.09036	2.0453	0.561165	-1.04623	1.08407	2.16496	1.4905	1.69991	-1.32595	1.83655	-0.824109	0.843043	-0.887764	2.04164	0.181929	-1.09282	-0.300196
CDK6	4.84222	5.243	3.83801	4.87722	4.47362	4.47893	2.21859	4.99479	1.94089	4.16456	3.70886	5.788	4.75095	4.03464	-0.355007	-1.98027	1.19556	2.24017	2.46987	4.984	1.66904	2.09772	1.73521	4.91622	4.64786	4.76238
PDE5A	0.483323	2.53836	1.75316	-0.532969	-0.897853	2.41528	3.18633	-2.08356	5.70654	3.69912	4.63154	0.967737	2.20393	3.94104	3.66352	2.10374	4.63452	1.62321	3.37167	-0.601665	2.98021	2.05251	3.6868	1.84107	0.592282	1.74314
AFAP1L2	-0.095586	0.280481	0.855041	-0.42942	-0.926572	-2.29292	3.52737	-0.207386	2.03894	2.17358	3.48539	1.72231	-1.00919	2.71036	4.81986	3.78075	1.58729	1.65535	-0.157657	-0.0861811	1.24458	1.04423	0.468406	-0.0226234	-2.91028	-2.41415
BMP4	6.77576	6.2535	3.52069	5.48365	5.45847	2.7154	1.12582	7.67262	2.15056	5.13387	2.98497	1.38504	5.9256	3.50946	1.39049	0.960504	4.26326	0.556827	3.09242	5.71521	3.58051	3.41527	2.49557	5.22861	5.44978	4.66363
GRAMD1B	2.78145	4.38345	1.66397	2.73091	1.26923	2.41035	0.541545	4.33593	-0.778004	1.77717	-0.472786	1.09906	3.0847	1.0225	-2.49417	-3.74882	-0.314501	0.550201	0.424331	3.867	-0.206793	-0.347915	0.03644	1.28037	1.76359	2.02066
SH3RF2	-0.240145	0.841772	0.366006	1.90709	0.802863	2.17167	-0.723804	0.39135	-0.256526	0.98413	0.523763	1.3305	1.14294	-1.79746	-5.85991	-4.74026	0.923963	-1.60575	1.47055	1.87991	1.38376	0.464198	1.54941	0.925111	0.556572	0.856173
MET	3.13259	3.82589	4.10268	4.66366	4.08716	3.05532	2.61463	4.54006	3.6168	5.02655	2.96126	5.15811	3.21343	3.27127	-2.54629	-2.94947	3.72527	1.61073	4.1365	4.58838	3.70086	3.42358	4.29619	3.89469	3.8796	3.83339
TMEM35	-0.148078	-2.98809	0.338966	-2.13435	-3.1771	-2.4259	-0.386868	-3.49169	1.16151	1.55507	0.694827	-1.61271	-4.88865	0.664283	-0.885446	-0.913681	1.12687	0.333023	-2.21971	-4.61937	-0.0980638	0.272202	-0.653841	-2.39124	-3.73781	-2.85632
ANXA1	7.01817	6.14645	7.8287	10.1049	8.16118	8.37013	7.93226	9.41397	7.39772	7.07882	6.79517	7.44656	5.75186	7.19295	8.1815	9.11923	4.28091	6.56287	1.77856	8.48316	5.77197	7.66689	3.12984	9.07771	4.31097	7.95931
SPINT1	4.82291	5.37058	4.98216	5.41684	4.93421	4.77836	3.06483	5.99191	3.24833	4.8551	3.73925	5.06981	5.67543	4.30394	0.346509	-1.09416	5.36225	2.45861	6.45872	5.56795	5.88241	4.25731	5.9539	5.00538	5.03288	4.62848
NLRP3	-2.03596	-0.696868	-0.138812	-0.404487	-1.80192	-2.18825	1.84792	-1.88313	1.57513	2.17573	0.382612	-0.0469851	-2.88137	0.53053	-0.221188	-0.153923	-3.23618	1.24889	-5.58604	-0.318965	-1.26735	0.282997	-4.81463	-0.912939	-2.97434	-0.270114
CD33	0.825142	-0.322978	1.33462	1.12683	-0.739228	0.897264	3.06188	-0.8873	2.87963	2.48966	2.88054	2.05733	-1.96558	0.992362	1.80966	1.92437	-2.57826	4.20888	-2.49028	1.1743	1.38464	1.88339	-3.56444	0.525267	-0.620126	-0.20707
TFAP2A	-1.23967	-0.420631	-2.45053	1.21434	-0.575149	1.30745	-4.2664	1.29249	-2.47165	2.11494	-0.915664	-0.703262	-1.53781	-1.67894	-4.41451	-5.78903	-2.8335	-1.01856	-1.55625	0.356741	-3.26947	-1.27056	-4.13963	-1.53571	-2.47613	-1.78783
FGF7	0.661047	-2.2112	2.90511	0.35069	-0.775098	-1.31703	4.18482	0.333344	3.08195	3.07867	1.74513	-0.134094	-2.40249	1.63231	-0.440943	-0.0687148	0.626336	1.22983	-0.783221	-1.15036	0.979191	2.17867	-0.351573	1.65897	-3.81499	-2.57299
ZMAT1	0.238359	-4.47686	-0.379778	-2.98884	-2.01116	-2.8646	0.860518	-3.00844	1.8392	0.0808077	-0.239261	-1.346	-2.0198	0.934479	2.08943	2.37062	0.523773	2.13502	-2.57537	-1.21205	-2.49516	-1.17788	-1.43665	-0.121334	-2.62133	-2.06637
TMEM132B	-1.23218	-3.77658	-1.88267	-3.24082	-5.00399	-5.77603	-0.646814	-3.24466	0.147737	-0.560224	-1.38747	-2.16228	-2.76731	0.49917	0.992	-0.292574	-0.0596558	-3.44434	-1.14846	-2.96723	-2.05536	-1.58082	-0.910475	-3.70634	-3.4662	-6.02036
LAMC2	2.89068	5.10077	5.81593	5.76274	3.603	2.90437	2.90117	6.26474	2.72381	6.54755	1.13641	4.15857	3.73551	4.41813	-1.22631	-0.70506	2.07448	1.52222	3.62506	4.59894	3.17867	3.64188	2.40509	3.43433	3.39063	5.66234
ANGPTL4	-0.0450488	-2.33853	1.36508	0.068602	0.182692	-1.52289	5.56051	0.882917	1.341	3.4318	0.637017	2.59997	-1.56103	0.621206	2.171	1.26363	-0.263412	2.46344	-1.60524	-2.63042	-0.494705	-0.650954	-1.35843	-0.451512	-1.90276	1.3821
ADAMTS9	-1.40934	0.404304	1.0853	0.351165	-0.371266	-1.52545	2.97649	0.126378	1.68822	2.36126	2.51986	0.35514	-2.21401	0.82642	-3.42341	-4.93572	-0.900376	-0.498258	-2.67314	-0.531252	-1.62844	0.073313	-3.09948	-0.97511	-2.12728	-1.2994
KYNU	-0.18947	-1.99435	0.894884	-1.74566	-3.34502	-1.42664	0.672597	-2.25225	1.20827	1.37053	-1.05427	-1.20251	-0.736244	0.436983	-2.8776	-3.26996	0.282499	2.50937	-1.57634	-2.44388	0.945623	-0.506732	0.580445	-0.822411	-5.13312	-3.89004
COMP	-0.717603	-2.06584	-0.452219	-0.800596	-0.894199	-5.37708	0.567526	-2.08891	-0.915498	2.34084	-1.02541	1.42252	-4.14771	0.427445	0.544545	0.299327	-0.316977	0.885793	0.130641	-2.06502	-1.09804	1.20096	-0.291412	0.110109	-5.04628	-3.32359
FILIP1	-1.14947	-1.07092	0.223151	-1.36273	-2.59869	-2.3961	1.86171	-3.12923	3.1318	1.26314	2.00421	-1.48087	-2.89039	2.09556	-0.62644	-2.82646	1.89266	-1.42947	-1.44163	-2.18427	0.284727	-0.294562	-1.19522	-0.954512	-2.74544	-1.90122
SYT11	-0.42104	-1.53758	0.384702	-1.64329	-2.87166	-3.87653	0.618229	-2.92396	1.54593	1.75634	1.37226	-0.283011	-2.10206	1.5952	3.98267	2.70629	0.157147	-0.494024	-2.85471	-2.43621	-0.072507	-0.0845418	-0.314767	-0.995164	-1.99191	-2.53763
CTSK	5.23875	5.68665	6.03464	5.97981	5.095	4.97533	7.78234	3.98184	6.11297	8.99358	7.79688	7.32012	4.22893	6.08211	9.00687	8.91535	2.86551	8.35299	2.23825	5.2747	6.28189	7.68308	2.89759	5.24314	3.82007	4.50656
ANGPTL2	2.05966	2.69364	3.09037	4.24331	3.04248	2.54301	5.03207	4.1333	4.5092	5.05987	5.29055	3.19147	0.491278	4.44749	-0.153102	-1.62503	4.28694	2.19119	0.199613	4.38799	3.77621	4.60734	1.92975	1.43561	-0.732893	1.42751
PRF1	-1.48741	-0.309599	-0.231728	-3.68301	-3.71545	-2.48233	0.308699	-0.603154	0.269464	1.061	-0.282079	-3.60303	-3.26243	-0.679705	-5.3361	-4.24184	-0.904265	0.930344	-1.14898	-0.816985	0.376524	-0.451331	-0.897119	-3.39352	-2.73646	-0.00650678
IL18RAP	-2.74173	-0.46551	2.0433	0.765866	-0.340561	-0.583859	0.987459	0.572996	0.935482	3.2532	-1.3834	-2.94384	-2.90022	2.02831	-2.81908	-2.06366	-3.09781	-0.53223	-3.25631	0.685653	-1.70683	0.134825	-2.70587	-0.757213	-1.59224	2.05658
ADGRA2	2.0777	0.86355	2.77459	0.897357	-0.171567	-0.0542844	5.30573	-0.266491	4.02373	3.80394	4.57397	2.88677	-1.7035	3.25431	1.0847	-0.917464	3.25935	3.03924	0.25759	0.928329	1.98979	2.26992	1.77468	0.605684	-1.73386	-0.548556
RET	1.46774	-1.31774	0.817173	-1.79056	-2.40209	-2.76642	0.902297	2.70767	0.159384	0.548989	0.668718	-0.411996	-2.03613	2.2885	2.56705	2.75225	0.0180074	-0.498745	-1.92259	-2.53676	-1.10669	-1.42177	-0.779021	-0.949784	-4.03872	-1.46301
INADL	3.54087	3.80811	3.14928	3.42994	3.03396	3.90499	0.93818	3.75409	1.7198	3.2341	1.48722	4.15438	4.00876	2.05259	-2.64079	-3.49951	3.66723	1.26482	4.55773	3.60979	3.58382	2.54457	4.40087	3.02455	2.74367	3.27765
TESPA1	2.2841	-1.92688	1.15894	-0.982534	-1.20655	-1.51501	2.78552	-2.26668	0.746425	0.0491149	0.391405	-0.631978	-2.74555	-2.40994	-2.76926	-3.03875	-1.70916	4.09663	-4.42688	0.193406	-1.45372	0.15505	-1.75259	-0.280072	-1.66116	-1.06949
PIP5K1B	3.55356	4.57084	3.67384	3.15121	3.75677	3.38081	1.17645	1.735	3.1693	3.08379	2.31822	4.21096	4.29764	2.68841	-2.55769	-2.52322	4.61301	2.7719	5.24982	3.72126	4.9151	3.59857	5.11809	4.04678	4.46476	3.30538
TTLL6	-3.93142	-3.60648	-1.1268	-4.35132	-0.736398	-5.61095	-0.265409	-3.38512	-2.03427	-0.447243	-1.02656	-2.88807	-2.19793	-4.24285	-2.05253	-2.79003	-0.263127	-2.79483	-0.832321	-2.31987	-2.44989	-2.50174	0.660929	-3.1	-6.32962	-5.80284
MTCL1	0.173498	0.622621	-0.00941394	1.04882	0.891925	-1.15474	-1.40813	1.60982	3.15546	2.51309	1.04798	1.67282	0.129204	1.80251	-3.44927	-4.71286	1.2622	-1.69753	-0.821414	0.716763	-0.505273	-0.30766	-0.649254	-0.876209	-3.58249	-1.68158
CGREF1	1.90653	2.18469	4.98914	2.06673	2.32892	1.77527	2.7612	0.571162	1.82301	1.99231	2.47464	1.64929	4.2735	1.83358	-3.12512	-3.35671	3.48249	1.80669	3.49916	1.70314	3.92544	2.82059	3.62222	3.1831	2.73567	3.04286
SLCO2A1	0.723148	0.395502	2.05351	0.319976	-2.53486	-0.0356531	4.0106	-1.43391	3.07517	4.25811	3.12032	3.2727	-1.07231	3.76506	0.708867	-0.52178	2.46242	1.31418	2.8263	0.358498	3.63316	1.49925	2.0494	1.23245	-2.27987	0.160301
WFDC1	2.48705	1.90082	3.76875	2.56038	1.19553	0.400964	4.45801	0.424116	5.84418	5.62635	5.65088	3.73776	1.03564	4.8676	1.54139	0.227026	4.45504	2.02553	0.679253	1.67341	4.33758	3.6328	2.23251	2.46268	0.351583	1.02942
RNaseP_nuc	7.72268	3.5872	2.94603	3.2102	3.98629	4.01563	1.97998	4.40786	-0.760692	-0.181907	4.79973	1.70889	4.8942	3.45783	1.92069	3.81445	2.57276	1.21783	2.81621	2.83744	2.44165	4.00699	2.63531	6.04044	4.66928	5.12259
ITIH5	3.21083	4.32709	4.3557	1.13655	-0.77235	0.815649	5.64247	-0.391344	5.35554	5.49845	4.04967	2.15164	4.65175	3.7238	6.62514	4.90081	5.20805	4.24296	3.82863	1.92692	4.29579	4.09855	5.26807	5.14149	5.40879	1.57555
LIFR	-0.476069	-1.90997	-0.705112	-0.66963	-1.4144	1.58337	1.90863	-1.36044	0.684217	0.574034	-0.70404	2.09661	-2.6163	-0.0325082	4.11338	2.42516	-0.510519	0.605305	-1.12077	-0.813743	-0.623396	-1.08336	-0.471097	-2.17087	-5.63846	-2.73662
SAMSN1	2.95101	0.810978	2.83597	0.871922	1.01765	0.00102395	2.49503	-0.586018	2.29166	2.936	2.17851	0.081476	-1.1775	1.78031	-0.161853	0.122911	-1.3109	5.07455	-3.75086	0.822706	1.96403	3.05678	-1.27008	1.53899	-1.16001	1.76305
RBPMS	3.72202	2.61032	3.40219	3.49734	2.74056	2.76629	5.22414	3.26237	6.92934	5.71216	6.05898	4.34791	1.57721	6.24147	2.57622	2.44775	6.54538	3.42588	0.890198	2.5036	4.48122	3.6722	2.51009	3.1394	0.312839	1.42057
ERAP2	1.78591	-0.341996	2.6578	-1.6586	-0.189568	0.882886	2.47345	-3.67935	2.0102	3.1142	1.41991	1.49063	-0.615042	-0.396975	-1.85644	-2.34367	0.620596	2.55066	3.08663	1.44459	3.63575	2.23881	1.29029	0.844233	1.35733	2.91415
COLEC12	2.64291	1.62527	0.951185	1.25802	-1.06666	-0.369822	4.50961	-2.86441	2.46272	2.67942	3.96504	2.5702	0.874994	3.15553	6.04612	3.96829	1.1907	1.95911	-0.0884495	0.493494	1.34617	2.07973	1.21763	0.677955	-0.903447	-0.455123
ADAM11	-2.59476	-0.340855	-1.43656	-0.743195	-0.582035	-6.00662	-0.0544402	-1.3503	2.76745	-0.656656	1.17831	-2.07646	-0.710994	-0.106871	-0.759932	-1.99776	-0.236075	-2.68914	-5.05809	-0.638899	-1.41953	-1.60352	-2.91555	-2.33736	-3.68539	-3.09027
AP1M2	5.17831	5.48794	5.08119	5.51099	5.75178	4.93921	1.99755	5.91783	1.68163	4.34411	3.67212	5.30131	6.03187	3.85498	1.36363	0.281312	5.12042	2.69516	5.52131	5.70425	5.92343	4.22642	5.63588	5.06731	5.69426	5.37035
SPN	1.23897	1.23167	1.85497	-0.310305	-0.306092	-1.16867	1.52542	-0.595701	1.17976	3.18103	1.10475	-0.165111	-1.36382	-1.07193	-3.43772	-3.34107	-0.936191	3.55748	-0.907341	1.19591	0.894364	2.4783	-0.25389	-1.06674	-1.70962	-0.404848
2018-09-01	3.98392	0.516398	2.65844	0.139705	0.867406	-0.649994	2.67049	-0.518829	0.673113	0.768146	1.2531	-1.21716	-0.00172505	-0.885452	-2.05428	-1.94972	0.856763	5.49967	-0.0342844	1.40205	2.4121	2.68189	1.25633	0.718614	-2.19601	0.681053
CYBB	4.92214	3.04663	4.36982	2.39175	1.59911	2.04906	5.70871	2.15865	4.45452	6.32048	4.88262	4.89776	0.655068	3.52257	3.477	2.5168	0.624756	6.58228	-0.478035	3.12779	3.74222	4.53812	-0.228525	2.59654	1.50535	1.5496
CCL8	2.35694	3.64479	3.85567	3.75185	2.08914	2.53494	5.29174	2.84436	5.08882	3.12171	2.68158	1.21352	1.44011	3.16675	1.1341	2.8618	-0.336695	3.73935	-0.413966	3.3705	2.94198	5.10649	-3.55541	3.56487	1.67073	1.42127
MYO5C	1.91913	2.5238	2.53445	2.95873	2.59091	4.11317	-0.684661	3.28329	1.35082	2.17105	0.650038	4.48638	2.98278	0.229354	-2.31778	-2.57946	2.84549	0.359993	4.05099	4.22178	3.20934	1.38681	3.57867	1.90511	1.54671	1.60302
PLEK2	4.06221	5.30379	4.66105	4.86592	5.82455	3.67301	2.93828	5.05506	2.45375	4.45024	5.15024	5.44358	4.78533	4.4686	-0.537554	-1.77561	5.12336	2.54789	5.67144	5.39813	6.2692	4.69407	5.72144	4.42591	5.41151	5.27366
ATP1A3	0.175058	-0.149937	-1.60773	-0.208703	0.90869	-4.14221	-3.14086	0.345385	-2.92286	-0.439772	-0.817926	-1.23062	-1.08028	0.846521	1.05901	-0.401835	-0.926501	-3.42176	-4.1811	-2.51068	-2.02077	-3.25847	-3.25406	-0.472247	0.331487	-6.39748
DYSF	-0.310878	1.12316	0.906036	0.165069	-1.84448	-0.780032	2.8263	-1.14881	4.08396	3.0123	3.11643	1.1688	-2.10698	3.50178	0.473226	-0.799245	3.15115	0.605532	-0.530295	-0.25769	1.19383	0.506795	0.12799	-0.440698	-1.2454	-0.854283
C9orf152	1.14144	2.38716	1.94774	3.47277	1.56057	3.35849	-0.632399	2.25179	0.373487	3.74466	1.67142	3.16974	3.2928	3.04916	-0.948775	-3.53213	3.30442	0.478516	2.74953	3.37068	2.33833	1.26578	4.12705	2.13565	1.57595	0.741117
BCAS4	3.57254	-1.67149	1.63321	-0.682626	0.167204	-1.51189	1.75715	0.352397	0.0904741	0.535406	2.11882	0.366633	-0.105636	-1.21808	2.25239	1.88774	0.437782	3.75959	-4.02672	-1.28632	0.928541	0.797843	-0.675708	-0.00865902	-3.73396	-1.20171
SYDE1	0.520387	0.281312	1.04799	0.609944	-0.814161	-1.88385	3.35013	-1.20241	3.54797	3.08864	3.54423	1.51702	-1.62063	2.81681	3.52124	1.85798	2.33368	1.17216	-0.684443	-0.288213	1.73773	1.20395	0.044548	0.174726	-3.10498	-1.10731
FAM129A	4.06839	4.44806	4.07344	3.25895	3.0798	4.15238	4.01596	4.44146	8.27303	5.42677	5.80305	2.9402	3.98339	7.39342	2.46831	1.40769	6.24133	3.27858	1.04743	3.89599	3.44673	3.40663	2.0722	3.34684	2.51806	2.77772
NUPR1	4.71612	4.75717	5.36978	4.3713	3.48389	6.18032	1.02787	4.73782	-0.14539	1.46686	3.3257	5.57001	5.7966	3.60399	6.37699	7.49334	5.44222	3.23147	1.80664	0.957432	5.81474	5.01341	6.04815	5.71573	4.34757	5.53257
ADGRG6	0.398219	1.2593	1.08993	3.27401	1.38114	2.73912	2.73243	-0.433278	2.35651	2.22848	1.05471	4.07564	-0.938943	2.37123	-0.594019	-1.2054	2.65088	1.54722	-0.251554	1.5307	0.140203	0.211075	-0.435269	1.75752	-3.97099	-2.03157
NT5E	1.1459	1.65937	2.18968	2.78511	0.545138	2.78812	5.58061	0.321801	1.98758	3.43781	4.22706	4.74636	0.513976	3.44257	0.194049	-0.288845	4.33638	2.82603	0.43143	1.28961	1.90349	3.34677	0.925096	3.36613	-2.08007	0.00712372
SLAMF7	1.49414	0.32995	1.95783	0.630182	0.801837	-1.27404	1.05417	-0.537885	1.67523	2.08092	1.46863	-1.02268	-0.359055	-0.00992227	-3.04485	-0.522689	-0.637401	3.89201	-4.26124	1.13173	1.22452	3.4499	0.00358785	-0.403462	-1.04589	-0.114352
LEPR	-2.82785	-4.30352	-3.90008	-4.94415	-3.76305	-2.78677	-1.94406	-2.70698	-1.47814	-1.40968	-5.63772	-4.433	-5.4916	-2.98815	1.91996	1.77996	-1.2546	-2.22578	-3.31208	-1.58912	-0.68192	-3.30416	-1.25628	-1.12075	-3.004	-1.31759
GXYLT2	-1.12322	-1.58888	-0.406736	-0.657357	-1.63081	-1.64108	3.69881	-1.25958	2.62018	1.43914	3.7346	1.09521	-1.22859	1.60126	-0.715502	-2.41687	-0.0781158	0.447145	-2.06139	-0.970857	0.603359	1.51541	-0.975805	-1.09881	-4.55422	-2.095
IFIT1	3.12592	1.52154	-0.353089	0.750495	1.13075	-0.00700974	1.13489	-1.27866	2.14658	-0.815131	2.69495	0.564915	2.0892	2.11649	-0.552476	-1.31377	-0.878722	1.64702	4.974	1.9126	5.77163	2.22388	-0.80403	2.60914	1.31903	-1.00984
LMO7	3.62709	3.88391	4.06366	4.68833	4.31712	3.36775	2.50435	4.58959	1.80777	4.02024	3.27534	4.42991	4.08773	4.20987	-1.20159	-2.35222	4.18576	1.40525	5.33366	4.37489	4.68713	3.78181	4.88127	3.83458	4.21402	4.39597
B4GALT6	1.93427	1.75599	0.426726	1.52307	-0.0550906	1.80782	1.54942	2.84426	0.902884	-0.987792	-1.10622	3.17935	-0.574571	2.00658	-0.435214	-0.74602	-0.10948	3.894	-4.85469	1.08513	-0.667362	-0.182008	-2.1247	1.14037	-2.53975	1.70734
CRACR2A	0.407766	2.71447	1.87758	-0.771749	-3.22907	1.98213	-0.0459794	-0.375981	0.757911	1.53721	-2.3305	-0.825752	1.4262	-2.22077	-2.82691	-1.49843	1.90663	1.0369	2.85018	1.47096	2.24141	0.883003	2.90298	-0.622479	-0.442865	0.0280033
PYROXD2	1.85562	1.77799	0.242572	2.38023	-2.49351	2.98274	3.1414	-2.58393	-0.581696	2.17253	2.55884	-0.203926	0.876432	1.48884	2.55472	2.02845	1.02326	1.84407	-2.61015	-2.06902	-0.45836	-0.359438	-0.28832	1.79343	-3.26955	1.43304
SMARCA1	-0.638308	-1.44298	-0.0539639	-1.08382	-1.70157	-1.56572	2.87958	-1.99905	2.72024	1.24742	2.71047	0.38873	-0.897095	1.4183	4.12056	2.85895	1.53353	0.693436	-1.69669	-1.58859	0.784362	0.819889	-0.312968	-0.370697	-2.8853	-2.41944
TNFSF13B	1.46559	-0.0824567	2.34166	-0.211981	0.202098	-0.612829	3.30946	-0.634587	1.95653	1.83328	3.67884	1.50347	-1.74195	0.879525	-0.88907	-0.991886	-1.55027	3.53429	-2.98343	0.604366	2.43853	3.91016	-1.42403	0.401139	-1.0407	-0.306359
ST14	5.68283	6.38892	5.89236	5.82093	5.26198	5.02878	3.04076	6.9654	2.8116	5.57891	5.37103	5.40517	6.38799	4.6145	0.144686	0.170271	5.27261	2.75842	6.46573	6.0274	5.62025	4.28611	5.86345	5.4596	5.81856	5.07957
NEDD4	-0.424918	-0.12039	0.283353	-0.560366	-1.52831	-1.36599	2.67974	-2.01846	1.88174	1.61562	2.1987	0.30044	-1.92449	1.43038	4.67101	4.10013	0.520246	2.10824	-1.87918	-0.374965	-0.166376	0.699747	-1.19155	-0.258223	-2.90454	-1.1613
GPX7	0.480834	0.398919	2.81764	4.98406	5.37017	0.358385	4.57279	4.5109	3.08982	3.76974	4.61074	1.99657	3.14572	3.43045	3.84657	4.13689	2.13626	2.93258	-2.12855	0.469386	3.5797	3.48225	1.75864	0.790822	0.236805	0.0235818
TMEM26	-0.825282	-2.05278	-0.250845	-0.408217	-1.96237	-3.07899	1.39316	-1.06267	0.258676	1.51939	2.37363	-1.60195	-3.11954	-0.921647	-2.00667	-4.70104	-2.03092	1.13169	-1.61367	-0.592534	-0.966072	0.249373	-1.59393	-1.1653	-4.96074	-4.38765
ECM1	2.72235	2.21976	3.51412	1.69198	2.2615	1.71512	6.02366	3.45275	2.90938	3.87829	3.93775	4.08528	3.02922	3.33176	9.30253	7.54822	2.34725	3.88371	1.57098	1.88018	4.17417	3.96714	1.9531	2.30387	1.13477	1.28773
ARHGEF10	-0.388548	-0.280708	0.689907	1.81455	1.97829	-1.17409	2.77978	2.87618	3.44457	2.91632	3.12356	2.3735	-3.12663	3.13375	3.36706	2.45546	2.4069	0.584356	-0.941858	2.4593	0.713177	0.522608	0.412489	-0.771914	-1.93244	-1.02742
DOCK2	2.83101	-0.499153	1.72183	-1.24161	-1.64095	-1.17103	2.27741	-1.93079	1.12455	1.6389	0.914587	-0.463324	-3.14209	-0.296478	-0.659062	-1.61531	-1.60426	3.63145	-4.04541	-0.154183	0.584616	0.955343	-0.88289	-1.25352	-2.4143	-0.828445
COL16A1	0.986222	1.5576	2.81766	1.51674	0.699374	0.362846	5.5204	0.521513	5.09186	4.48594	4.62318	2.68609	-0.43971	4.77401	3.92132	2.3106	3.44491	1.88881	-0.438771	0.453217	2.11621	2.1922	1.40234	1.32145	-0.994284	0.258615
ARNTL2	1.24943	1.18851	-0.261583	0.429129	1.37392	-0.499202	2.8529	0.729192	1.61366	1.83625	2.19339	2.1355	1.12656	1.42343	1.77375	0.856205	-1.75848	0.970957	-3.74937	1.00702	-0.168137	1.44469	-3.37589	1.64727	-1.77179	-3.95624
BPI	2.26224	4.47828	4.78104	3.84913	2.69858	3.58457	7.23797	2.96623	6.25438	7.03239	5.59998	6.82657	2.27505	4.76814	4.83294	4.15142	1.52897	6.26486	0.767841	4.30813	5.10849	6.18273	0.490396	3.41289	2.43966	2.97939
SLC2A1	5.178	5.79585	5.83802	6.18412	5.61494	5.08046	4.089	4.91352	3.47004	6.82781	3.95317	5.36965	5.39066	4.71907	0.431762	-1.47812	4.82392	3.33811	6.48273	5.89375	5.88686	5.0288	5.35032	4.81203	5.41296	7.27067
PARP8	1.93076	-1.24421	1.36942	2.19289	-0.323772	3.75356	2.86514	-0.301719	2.75443	3.13332	3.12634	3.82236	-2.33811	2.83103	1.23447	0.72118	2.04523	4.10097	-1.50269	0.507505	0.613635	1.78263	0.596334	0.0716391	-1.50446	0.621515
CUBN	-1.56568	-3.22753	-3.30305	-1.70581	-3.63175	-5.61369	-2.62204	-3.81319	-3.76127	-1.69232	-2.59698	-2.88074	-4.679	-2.5373	0.827274	0.999192	-6.8381	-2.95336	-5.43517	-3.6885	-4.87962	-2.26866	-5.29347	-2.98648	-6.33961	-3.17697
C1QTNF7	0.651444	-2.04198	0.829257	-1.04326	-2.67262	-2.87914	2.28821	-0.415961	0.115246	0.559316	3.23741	-0.903328	-3.48358	-0.194088	-0.699333	-0.857009	-0.141195	1.08771	-2.90433	-0.79493	0.572744	1.02107	0.209641	-1.00126	-4.36037	-4.36048
SACS	-0.372657	-1.53803	-0.333867	-1.4216	-2.42268	-2.75649	1.46895	-3.0685	1.9924	1.30018	0.838121	-0.705737	-4.12141	0.786571	1.04481	0.801076	-1.4753	1.54415	-3.91723	-1.31671	-1.31073	-0.356114	-2.46161	-1.68168	-4.45507	-1.50092
SRPX2	-1.59733	-0.557841	0.503542	-2.13469	-1.93769	-1.82344	3.10399	-3.67123	1.33732	2.08536	2.91778	1.27169	-1.83932	1.82239	-1.03541	-1.46768	-0.209023	-0.422064	-2.48601	-1.47115	0.217628	1.54937	-2.35488	-1.46762	-3.03187	-0.728828
DOCK3	-2.37915	-3.34043	-1.77037	-3.20582	-4.58704	-3.86055	-1.15467	-0.876016	0.24362	-1.27373	-0.232067	-0.812321	-3.91059	-0.5241	0.727215	0.617637	-0.358498	-0.0154092	-4.55961	-1.51983	-3.0665	-1.18887	-2.43994	-2.35888	-4.81902	-5.84031
CA2	3.48347	5.34816	1.20781	1.40296	1.31928	0.91976	1.42009	0.487126	2.0074	5.07363	2.64276	3.95827	4.05897	4.81052	-0.634399	-0.475381	4.58694	5.23538	4.77818	1.23549	3.92514	3.2214	4.94182	2.7256	3.56973	5.45088
MAPK8IP2	-0.254248	-0.357742	0.599013	0.0645932	-0.298231	0.433654	0.481082	2.97988	-0.226394	-1.11876	-0.304402	-0.619599	0.723899	-0.650132	6.44266	5.04091	-0.153979	-1.02684	-0.387723	1.13444	1.12767	0.579441	0.340779	-2.15223	-0.35917	-2.16437
CD69	3.15923	0.897821	2.83947	1.36304	1.12646	0.127448	3.0757	0.465525	2.64451	0.651913	2.18484	0.0163679	-1.72566	0.375145	0.186298	1.2247	0.0777625	5.95588	-1.23048	1.67925	1.39308	3.49264	0.0563199	1.52737	-1.56407	2.06499
GLI3	-0.849747	-0.218199	-1.47287	-1.35288	-2.10608	-2.43494	2.44829	-0.267594	2.02048	1.16675	0.919599	-0.240386	-1.44715	1.83992	1.69343	1.05283	1.38985	-0.7026	-4.18973	-1.338	-1.50046	-0.789596	-2.42591	-2.35763	-1.73022	-3.85455
BAMBI	4.66273	3.43245	2.41811	3.81338	5.36787	1.28579	2.17399	5.5857	-0.367015	3.45846	3.25582	3.11316	4.4008	2.40275	-1.07689	-0.927562	0.380186	1.71653	0.366207	3.77361	1.96506	2.7561	0.528611	3.74853	3.10764	0.596859
CNTN2	-2.46982	-4.62252	-2.72955	-3.71689	-1.96635	-3.19908	-3.52524	0.0711311	-2.35965	-4.12178	-2.51685	-6.22269	-2.85977	-0.650927	-2.40509	-3.24419	-1.66029	-3.3431	2.98226	-2.57728	-0.744843	-2.94639	-1.19763	-2.2435	-4.75659	-4.60515
IL12A	0.743748	-1.07761	1.44198	1.31528	-0.104322	1.62527	1.21109	-1.05059	0.384282	0.682232	0.134221	0.0920586	-2.83825	-0.794342	-4.79448	-3.02551	-1.47528	1.87044	-2.38516	0.0452193	-1.08209	-1.01675	-2.9577	-0.352809	-3.28798	-3.14567
SLC39A4	4.35883	3.1768	3.96377	3.94958	4.85945	3.16923	3.17045	4.11698	1.94715	3.63191	3.08878	4.39553	3.96145	2.65871	-0.292521	-1.18234	5.22593	2.15925	5.83674	4.57288	6.62471	3.59593	5.8842	4.01488	3.60442	4.0858
NPR2	0.0672394	-0.83466	0.617148	-0.846039	-2.54764	-1.19171	2.62267	-1.57989	2.98656	1.36297	2.26376	0.470917	-1.71734	1.97345	1.83185	0.880239	1.94197	0.668927	-1.91691	-0.94106	0.23115	0.485571	-0.345288	-1.11654	-4.23189	-2.57387
NPR1	-1.70531	-1.18495	0.0159542	-1.61567	-3.32191	-2.40181	2.14667	-3.82148	1.43539	1.15442	0.873986	-0.436108	-2.37076	2.56517	-2.66775	-2.15995	0.919355	0.634212	-0.344787	-1.49204	-0.285562	-0.915563	-1.27578	-0.987772	-4.075	-3.05996
MATN2	2.68757	2.10422	3.00766	1.53888	1.86144	0.290259	4.27549	-1.54236	2.84287	2.73148	4.57968	2.72658	1.29556	3.2642	6.71452	6.92513	3.94824	3.65076	3.94714	1.11294	3.92556	2.81213	4.11135	1.52662	-0.268215	1.49901
COL15A1	1.3953	4.7632	3.24699	3.87307	1.94292	1.57423	5.88352	2.29607	5.28529	6.84578	5.97983	5.49349	1.04523	5.32499	1.95841	-0.110517	4.31404	3.14374	1.34455	2.39539	3.93797	5.22267	1.8954	1.67913	1.80174	2.65255
LSP1	5.29232	3.45742	5.45617	3.24089	2.58908	2.36714	7.43635	1.14718	5.82341	5.3399	6.97517	5.56352	1.64441	5.44114	1.91505	1.21056	4.542	6.86468	2.72046	3.26515	5.54555	6.14532	4.18435	4.5346	1.45307	2.94156
NOS2	-0.337647	4.06371	-0.710548	-0.56458	-0.176741	-0.267502	-0.457393	-6.07085	-0.624993	0.232047	-2.21235	-2.58451	1.12543	-1.01202	-1.00844	-3.37001	0.378001	-1.67313	0.357	0.75546	-1.16888	-1.02494	0.697952	-1.65259	2.15125	-0.889102
SEMA3C	2.68031	2.2492	2.49784	4.21313	3.39686	3.45572	5.25564	4.94558	5.49588	3.86651	2.94595	4.599	0.937359	4.8499	7.1132	6.34529	4.53465	2.26598	-0.138893	3.67409	2.84151	3.13069	1.01336	2.86957	0.0263752	1.92279
NRROS	2.18752	-0.494827	1.76752	1.55532	1.44095	-1.01557	2.61776	-0.0697441	1.91878	1.83877	0.748435	2.39031	-2.98866	0.496104	-0.990323	-1.49208	-1.27338	3.23023	-1.65603	0.831464	-0.136555	-0.283306	-1.39226	-0.464078	-4.46918	2.57316
GUCY1A3	-0.304387	0.289162	1.12155	1.56277	-0.878115	0.106817	0.880325	-0.98587	3.5204	3.8222	3.67839	-0.381572	-0.617674	3.62603	-0.924681	-2.1588	3.69755	-0.673923	-0.775678	0.736007	1.73614	1.23125	0.756332	0.68189	-1.78652	-1.15871
TMEM154	2.59087	0.468177	2.52787	1.50756	0.570278	-0.939355	3.97176	1.02061	3.51173	3.65933	2.66727	1.91147	-1.22391	1.97533	3.01917	2.14583	-0.895317	4.7658	-0.752046	1.79183	0.201634	2.61728	-2.982	0.380608	-1.07896	1.06923
GNG4	0.934773	2.839	1.68897	-3.14359	-2.70236	0.793197	-0.0159634	-1.74689	0.354824	0.846377	0.818662	-1.0482	2.94617	2.3591	1.95251	0.726779	-0.448824	-1.30169	-4.70792	-2.20751	-0.235231	0.149259	-0.424934	0.584857	1.54208	-1.37724
ITGAX	1.20586	0.618915	1.67691	0.815756	0.341633	0.109882	2.62519	-0.230062	2.21864	4.77363	2.66519	2.17474	-0.649	1.15607	1.86692	1.33297	-1.8092	4.32238	-2.89142	0.981305	1.85997	2.70464	-2.41017	0.734569	-1.18414	0.333115
CAV2	4.61632	2.91087	3.75956	6.5051	5.99692	5.44926	5.21538	7.2917	5.33402	4.59192	4.91208	7.5408	1.92331	5.0289	8.08334	7.6659	4.02944	2.35822	1.92081	5.33227	4.21653	4.07058	2.04719	3.93007	1.06822	3.61732
CELF2	3.04682	-0.00191428	2.17835	0.631319	-1.64797	1.29137	3.39428	-0.833133	3.44581	1.92327	2.9406	1.65499	0.81309	2.93378	4.37997	3.93617	2.13279	4.38988	-1.74599	0.939693	1.50546	1.75682	0.934954	1.32339	-2.09093	-0.0525089
PIM2	2.54503	3.54556	2.59445	2.75159	3.02653	-0.134008	0.960586	2.98035	0.558748	1.55517	2.29552	0.984655	1.63546	0.674054	-1.24093	-0.618378	-0.255217	4.62705	-1.62094	2.57878	2.12525	5.29968	-0.271881	1.95994	1.73632	0.531828
CSF1R	2.48377	2.68064	3.22506	2.61156	1.25154	1.94358	5.72578	1.60955	4.22273	6.02162	4.61868	3.87466	0.250355	2.93435	3.99373	3.05222	1.51027	4.78521	-1.51264	2.75917	3.17993	3.95093	-0.398608	1.66757	-0.592634	1.02478
BASP1	5.96847	2.21303	3.56728	3.91343	5.05999	3.28461	4.84425	3.49349	2.53141	3.86221	4.35815	4.76199	2.13149	2.90545	1.95127	0.304172	1.02301	4.68669	-0.269869	4.3848	1.93532	2.89312	0.324154	1.43487	-1.48869	1.86026
GUCY1B3	1.69258	1.52504	1.8304	1.96752	1.9443	1.81728	2.4476	-0.412193	4.79557	4.38525	5.16934	1.40199	0.115366	4.62085	1.21761	0.687267	4.96133	2.45792	-1.40528	1.04464	2.40822	2.69897	1.24809	2.12324	-0.186618	0.255875
PYGO1	-0.361819	-0.619967	0.209491	-0.079257	-1.63928	-2.21155	2.62084	-2.55218	3.17571	2.11102	2.82902	0.142518	-2.57746	1.99039	-0.534621	-1.94632	1.50913	1.35196	-2.89838	-0.906372	-0.668678	0.437888	-0.930163	-1.14201	-2.11986	0.173191
EPB41L3	1.37216	3.45447	3.61239	-0.125872	-1.34196	0.565948	3.1796	-0.602368	2.5372	2.46023	2.3081	0.480565	3.27305	2.14782	0.458403	-0.177945	4.80319	2.53895	5.84979	1.23546	4.91382	2.79504	5.32067	2.07063	3.35272	4.08555
SYT16	1.50679	1.73277	1.2038	1.0829	0.354824	0.0325946	1.40925	-1.94103	0.855408	0.898131	0.342259	1.43027	2.14968	0.517951	-4.93018	-4.79739	1.30424	1.86732	2.81146	1.46474	2.53083	2.0449	2.26502	1.11145	0.889653	0.680405
DHCR24	4.89953	4.91702	4.43427	5.38218	5.15536	4.00715	2.37339	5.72286	1.74471	4.02471	1.40703	5.5323	5.46161	2.6749	1.13031	-0.77454	3.2536	2.30837	4.91941	5.86108	4.96483	2.46972	4.09186	4.40963	4.43004	4.38924
RASD2	-2.51772	-1.89233	-1.56014	-2.31915	-3.76056	-2.51878	1.27185	-1.93384	2.01892	0.865483	-0.223285	-0.862253	-1.71912	1.21829	-2.37788	-4.29128	-1.24427	-2.24585	-3.23795	-2.17352	0.0976378	-2.2528	-1.30238	-2.00277	-3.78813	-3.82565
FAM213B	1.62666	3.19377	1.41215	2.54753	2.38744	0.821155	0.159138	0.302945	2.79694	-1.43996	-3.23641	0.154298	2.45414	2.86685	2.04853	3.1526	4.11641	1.55597	-2.3513	1.82964	1.28744	2.04776	0.668364	2.70652	2.29664	3.42375
CA13	1.86599	3.71268	3.28511	1.53973	2.20883	4.08753	2.48256	1.42383	2.20753	3.37742	2.97629	2.88426	3.41079	4.59001	-1.252	-1.63989	4.29795	2.79133	5.45772	2.39465	5.43899	3.49185	4.86357	4.53112	4.71218	4.2491
IL2RB	1.90441	1.13635	1.98127	-1.09831	-0.70682	0.251349	2.70897	0.508986	1.05401	0.945443	1.41453	-2.06339	-2.68436	0.175237	-2.96134	-3.27127	-0.0584369	4.06059	-0.0804311	1.62958	1.26096	2.06517	0.836263	-0.0223332	-1.20751	0.165841
KIF5C	1.29019	-0.839808	1.95248	0.0312117	0.275818	-0.43055	0.298072	1.59537	2.77257	3.45088	0.280315	-1.18042	1.83693	2.57591	2.55859	1.25432	1.96919	0.496575	-3.13329	-0.98603	-0.0416636	0.425137	-0.490533	1.42334	-4.0703	-2.21664
NPTX2	2.62009	4.48941	1.70243	2.59404	2.37909	2.71091	-1.53125	4.64107	1.39421	1.23921	1.70185	3.0391	3.29511	2.46515	-1.23725	0.210725	0.17424	-1.4	-1.55675	4.26266	0.875269	-0.268085	0.469313	2.39742	2.36361	4.02377
C1S	4.8894	3.93733	6.71116	4.82	3.51494	3.77041	8.48677	2.58544	6.78694	7.04355	7.2769	5.81005	2.43106	6.1734	7.4872	6.74141	4.4531	7.4978	2.78463	3.83246	6.81845	7.40374	4.50633	5.11636	1.95183	3.15822
IL18R1	-1.86004	-0.452519	0.740599	-0.309004	-1.20934	-1.1519	2.70474	-2.00546	0.093452	2.20731	1.00357	-2.88618	-2.96174	1.32673	-3.67944	-4.4116	-2.52084	0.0892269	-1.5358	-0.497227	-1.47951	-0.941323	-1.44372	-0.348181	-2.6308	0.85744
HK2	3.43921	4.82464	5.27356	3.63116	3.63688	3.02419	3.29995	2.92885	3.29895	4.81039	4.43984	3.66578	4.53987	2.64474	0.251301	-1.17099	6.50529	1.79091	7.16039	3.13423	6.0515	3.78835	7.15319	3.43455	4.74875	4.25221
UBAP1L	1.33495	-1.11164	-0.570542	0.914243	1.68552	0.222458	-3.20584	-0.380236	-1.0723	-3.17034	0.588123	0.835471	1.60172	0.514804	-6.46125	-1.70405	0.356482	-0.948405	-0.345082	1.18022	0.257155	-1.11895	0.895039	2.55205	1.13525	0.266241
ZEB1	2.09814	0.640787	1.91146	0.787608	-0.0843017	0.284313	3.93882	-1.25928	5.49101	3.69141	4.56356	1.88081	-1.181	4.23331	2.79772	1.67247	3.18561	3.30601	0.580618	0.667456	1.86424	2.72383	1.236	1.20035	-0.811999	0.668446
PLCL1	-0.534989	0.0147695	0.636859	-0.7559	-1.61998	-0.867639	1.96335	-2.61818	2.89221	1.25656	2.84667	-0.00709963	-2.64899	1.78063	-0.332638	-0.45331	2.44256	1.37341	-1.22207	-1.4188	0.178619	0.165635	-0.815969	0.08258	-2.79644	-0.735425
ZEB2	1.22245	0.763836	1.95457	1.17045	-1.24554	-0.040902	5.23535	-1.4733	3.68522	4.32265	3.19287	2.55528	-1.82986	2.53779	4.32625	3.33505	1.65276	3.24942	0.822379	1.28841	1.60481	2.40606	1.22757	0.881234	-1.52897	0.12762
OSBPL3	2.31892	2.48332	0.446172	3.29018	3.94338	-0.00946186	0.494262	3.89912	0.957699	3.41602	1.5317	4.44004	2.66894	1.58443	-2.29802	-3.05982	-0.706889	0.889123	-0.440085	1.91232	0.397584	0.531609	-0.760959	1.40539	0.705766	1.04737
TCF7	3.18515	2.8883	2.86965	3.2132	2.41324	3.44343	2.4247	3.89973	0.392669	2.90812	0.939858	2.12067	2.67435	1.58301	-0.74418	-4.19465	1.25629	4.54746	1.16006	3.59705	1.68658	1.71873	2.29244	2.02802	2.08774	2.6676
ADAM8	1.77074	2.18909	3.09367	3.43066	1.36945	0.309304	2.90411	2.30859	2.85314	3.91581	2.82156	1.75497	1.37469	3.32451	1.74814	1.1596	-2.34472	2.08451	-2.51532	1.90636	0.517024	1.9473	-3.45697	1.53596	2.87427	2.07583
ASB9	-1.15759	-2.38044	-0.589898	-1.23841	0.790572	-2.4248	2.44004	-1.36447	0.551649	0.642757	0.895729	-1.90528	-3.20823	1.24536	3.19438	4.10149	-1.54462	1.6027	-0.885129	-1.23266	-0.309106	-1.01257	-2.52478	-0.0316526	-3.09842	-0.418487
RUNX1T1	-0.636656	-1.88861	-1.24694	-1.02213	-2.61776	-1.71054	1.67738	-2.6814	2.03265	0.284751	2.90769	0.406384	-2.66978	1.59447	-2.58824	-2.95224	1.20152	-0.0285488	-2.64204	-1.32208	-0.444319	0.113767	-0.538119	-0.738154	-3.52173	-2.85311
SMTN	2.65567	3.72862	3.29741	3.24813	2.72653	3.03659	4.54007	3.09553	7.95416	5.25465	6.32444	3.45757	3.76088	7.27105	3.48943	2.29304	7.76867	1.75992	3.57716	3.52609	4.3258	2.8627	4.61155	2.86132	2.64388	2.49452
IGSF11	1.12491	1.74479	0.940956	1.75597	-0.448182	1.31795	-0.312473	3.1488	-1.05552	-2.0053	1.00199	1.43513	1.74322	1.44171	-2.87686	-4.26216	0.27733	-1.31181	0.939505	2.54408	0.695388	-0.174397	-0.302988	0.414688	-2.97601	-1.59201
IL1A	3.43843	4.97973	4.18365	5.16859	5.527	3.16468	3.40569	2.6664	2.79781	6.70885	1.67388	1.14266	4.15256	4.48002	2.77833	4.37196	1.32137	3.40329	0.314894	4.63188	1.41222	4.78771	-1.28622	4.24603	2.17141	4.89804
PELI3	-0.776358	-1.42696	-0.488281	-0.338953	0.562777	-0.737199	1.69827	-0.579407	2.68887	1.48409	1.23519	0.350373	-2.34595	1.73386	2.91921	2.56265	1.96635	1.12884	-3.13048	0.442439	0.695317	0.269763	-0.847235	-0.644305	-2.71837	-3.37006
H2AFY2	1.47863	1.19556	0.980457	-1.49353	2.27003	-4.3628	0.734508	-2.82784	1.10866	3.08205	0.662497	0.416883	2.1355	1.75612	-0.899267	-0.899501	1.86655	1.28475	0.942661	1.0849	1.47719	1.13908	1.38061	1.70326	-4.06662	-0.65133
EVI2B	2.94531	1.42926	2.68597	1.54503	0.213801	0.145325	4.35593	-0.262365	4.36142	4.08397	2.5292	2.59528	-0.115008	2.60116	1.28891	1.57951	-0.687569	4.87956	-2.48575	1.66109	2.17058	3.23332	-0.466325	1.13065	-1.26807	1.12018
SLCO3A1	2.03351	2.29349	2.91834	1.70912	0.614625	1.43793	2.52952	-0.00965792	4.27384	3.99541	2.84157	1.19363	2.76563	4.01978	-2.09122	-2.15763	4.44282	3.09368	0.3349	1.50755	2.03125	2.23049	1.6907	2.37356	1.7297	-0.0285341
IL33	1.86355	1.93321	3.4485	2.04237	1.40646	0.894899	5.85824	0.0121396	4.21555	3.38813	3.40171	2.53485	0.20384	4.23478	7.26166	6.97945	1.87967	4.30283	1.08224	1.72193	3.06064	3.63979	1.6853	2.74098	0.766858	1.67684
FSTL1	4.09987	4.75723	5.2289	4.88016	4.08594	2.87402	8.53014	4.20352	6.86999	7.21511	8.8427	6.91368	3.958	6.66854	9.22554	8.18447	5.54738	6.13715	3.32458	3.99265	5.83547	6.81782	4.49381	4.89105	2.40105	3.87889
ZNF154	-1.02606	-2.51889	-1.4992	-5.14518	-4.04609	-0.196766	0.651628	-4.92314	0.947098	0.67973	0.363194	-2.05577	-3.66728	0.460575	0.30395	1.13489	-0.122342	0.922122	0.704013	-1.20095	-0.992317	-0.472828	0.0535979	-2.79138	-0.369667	-1.21677
NCKAP1L	3.22464	1.49598	2.50054	0.5144	0.00702323	0.487713	4.32463	-0.288852	3.11496	3.89824	2.96056	2.35356	-1.81615	1.855	1.5712	0.527811	-0.483872	4.50595	-2.21112	1.41356	1.92576	2.59705	-0.101895	-0.107865	-1.52315	0.494446
PKNOX2	-1.18578	-2.18038	-0.892534	-3.5771	-2.79784	-3.31136	1.1822	-5.94635	0.284704	-0.533873	0.0159257	-3.48342	-3.69722	-0.0244901	-0.370883	-1.87512	-0.324697	0.314395	-2.15705	-3.76035	-1.06212	-1.20001	-1.39345	-2.80729	-5.58772	-3.01951
ATRNL1	-2.37228	-3.24315	-1.41354	-5.48837	-4.50611	-4.3496	0.419409	-3.45213	-2.26825	-0.437809	-0.77862	-0.131359	-6.06591	-1.18571	-2.19285	-1.66395	-2.63728	0.00969114	-3.53659	-3.53649	-2.74451	-1.2005	-3.0028	-2.89512	-5.88762	-5.65221
CD300LG	-1.04158	-4.42366	-0.732531	-2.50326	-3.9028	-3.24096	2.43346	-3.60635	0.553144	-0.252539	-0.117564	-2.26964	-3.90016	-0.432766	-1.23143	-3.28766	-0.294043	0.295535	-2.20231	-2.79978	0.191588	-0.816662	-1.24494	-2.39987	-4.16808	-3.77311
RNF150	-0.882082	-0.700537	0.48657	-2.15243	-1.13356	0.1153	1.56262	-1.296	2.40507	1.20917	1.4711	-0.771426	-2.79841	1.47279	-0.0601882	-0.899413	0.796074	-0.855408	-2.91832	-2.09728	-0.301799	-1.05287	-3.96758	-1.82641	-2.00245	-4.86831
FAM198B	0.416126	0.961483	2.83331	1.51902	-0.58335	0.125968	4.42992	-0.636683	4.23492	4.2703	4.14683	2.64266	-0.845051	4.53336	1.62091	1.04079	3.08594	2.45853	0.398909	0.553626	2.97495	2.93672	1.26629	1.78311	-1.51674	0.32269
DERL3	3.52693	3.94241	4.75729	3.10181	3.96279	1.76039	0.841136	2.69249	0.127897	2.9909	3.53447	2.76553	2.85784	0.751404	0.413572	-0.296805	2.88183	4.32555	1.58386	3.27515	3.9484	6.14831	2.93885	3.04809	2.53276	3.22977
SLC4A11	-2.10206	-1.14429	-2.84937	-1.85043	-1.28723	-2.74531	-3.8848	0.328756	-4.47751	-1.65166	-3.03371	0.362576	-2.38901	-2.74653	-0.843176	-2.22746	-6.05212	-0.695089	-5.73913	-2.08606	-4.60806	-3.13374	-5.80298	-1.81534	-2.63829	-2.45372
LRRK2	1.67214	-0.203912	1.76797	1.39845	-1.58989	-0.753791	3.16576	-0.667208	3.99603	3.93871	2.84797	0.627906	-1.93781	3.30564	2.00516	1.2823	1.0258	3.75771	-1.50689	1.18519	-0.108637	1.17766	-0.24991	-0.0669517	-2.21838	0.581448
FRMD3	0.58272	2.43049	0.582354	-1.44173	-1.21443	-2.44153	1.78747	-4.11348	1.90503	2.39935	-0.431567	-0.876853	1.21516	0.822216	-2.44068	-2.76523	1.49229	-1.10303	1.4393	-1.706	1.83277	0.773043	1.77134	-0.666004	-2.7416	0.362801
EHD3	3.55797	0.829914	2.44362	0.886987	-0.298559	-1.62747	3.1454	-0.507788	0.940911	2.77065	1.15038	0.917355	-4.40628	1.59463	-0.995791	-2.55487	0.549373	3.643	-0.0566367	0.504468	1.53087	1.19422	-0.265485	0.25654	-1.15551	-1.4305
MEIS1	0.313768	-1.34791	-0.588151	1.0111	0.236842	0.284076	2.47665	2.68896	3.40753	2.43103	2.41087	0.95126	-1.76605	3.21669	0.428314	0.294571	2.95444	0.446754	-2.76846	-0.289582	-0.183857	0.985165	-0.0591868	-1.29557	-3.04475	-0.433062
ITPKA	1.59358	3.14205	3.17873	1.84341	1.47816	2.13208	0.951692	-0.259903	0.777106	2.61737	2.43696	1.70597	2.54833	1.92155	-2.47532	-2.53907	3.87832	1.47549	4.2672	1.48233	3.94417	2.11899	4.48911	2.76588	3.58329	2.77619
NRP2	2.06392	2.20983	2.94175	4.09881	3.01837	2.43011	4.74527	4.10664	5.29685	5.81058	4.32481	3.98922	-0.106871	4.26277	3.47155	1.77623	4.37976	2.76297	-1.35005	4.29793	2.4558	2.84196	1.57599	0.789412	0.0351875	0.28257
CBLN3	-2.07343	-2.62418	-2.8273	-6.09034	-4.43877	-3.02308	0.698307	-4.8645	-1.70534	-0.233551	-0.0568078	-2.21186	-5.66035	-2.15753	-2.1329	-1.65059	-4.52472	-0.0123095	-3.7206	-2.94007	-1.21691	-1.68318	-4.84537	-4.77785	-5.533	-1.86088
MMP25	1.21893	0.255501	1.99438	0.497597	-1.12324	-2.7515	0.787023	-0.493701	0.97011	3.0777	0.767909	-3.35123	-1.77404	1.71589	-3.04046	-3.59483	-0.948299	2.32972	-0.19515	1.02023	-0.317572	-0.146787	-0.218395	-0.89514	-2.99398	0.644567
PTPRU	0.315323	-0.768499	0.512753	0.721793	0.497863	-2.61524	3.21566	1.48291	0.574954	2.40082	2.52939	1.67555	-1.58941	1.56652	-2.10035	-3.09368	-1.19786	0.585213	-3.43395	1.43527	-1.02044	1.45225	-2.28672	-0.194879	-1.54687	-1.90307
COL1A2	4.78383	6.1505	6.77468	6.64685	4.79742	4.91336	10.1224	4.71652	7.3499	8.44734	9.9707	8.80624	3.29002	7.57495	8.59556	6.30568	5.78882	6.82313	3.90217	4.9182	6.86207	7.75403	5.30158	5.28273	3.8024	4.60869
IGFBPL1	1.9033	3.3023	2.15882	2.12477	0.491402	-1.41142	0.776188	3.93349	0.149793	2.64159	1.36918	2.28719	2.64727	1.47846	-0.265145	-3.95511	2.49866	0.0167816	3.31262	1.78451	3.29053	2.24713	3.40625	2.35438	1.99758	0.340619
CASP16	0.938775	0.262854	1.48036	0.375668	-1.26935	3.35792	0.776449	-1.31001	1.37078	-1.49833	2.14858	0.0780086	-1.48058	0.239752	-2.6151	-1.49579	2.3155	-0.307957	4.18384	0.684334	0.463915	-3.06801	3.19171	0.501454	0.833983	2.90079
ZFP82	0.710957	-1.36259	-0.127089	-1.72607	-1.49521	-2.43713	1.77398	-2.59689	1.66389	0.844667	1.81361	-0.661091	-1.91107	0.378445	2.18316	2.34627	-0.198759	3.02966	-3.70312	-1.80751	-0.0298605	0.617975	-1.06661	-1.2927	-2.76431	-2.85002
PDE7B	0.224139	0.303342	1.13887	0.484881	-1.66603	-0.463577	1.74777	-0.387965	3.64341	3.73723	2.29128	-0.176546	-3.64123	2.25857	-1.1107	-2.52209	1.91629	0.0565142	-2.05294	0.106523	0.105195	1.10506	-1.61805	0.293476	-2.49035	-0.817585
IL2RA	0.690435	0.822926	1.63034	-0.365641	-0.315569	-0.563806	1.71193	-0.367706	0.60026	1.25019	1.08929	-0.948503	-1.72295	-0.121676	-3.79689	-2.18812	-3.49592	3.1471	-2.60265	1.36952	-0.168423	1.54266	-2.3698	0.0639585	-1.59086	-0.593557
ARHGEF9	-1.6904	-2.94372	-2.19456	-3.13173	-3.8878	-4.68966	0.16827	-6.3597	0.110363	-0.655615	0.170681	-2.09466	-3.78296	-0.314402	-1.00266	-1.24211	0.00419215	-0.791985	-4.14331	-3.39843	-1.21073	-1.02903	-1.6053	-2.2174	-4.40613	-4.448
NRGN	-0.944046	0.333836	0.766451	-0.00508145	0.669399	-3.19183	0.105437	-1.11706	5.59072	1.04615	4.80333	-1.38109	0.494149	-0.189629	-1.06962	-1.40356	2.02395	0.900544	1.90724	0.191247	1.45941	0.649588	1.94508	0.802367	0.460491	1.93492
GULP1	1.88696	1.55735	2.54211	1.42755	0.549876	-0.283369	4.26131	-2.4876	4.53998	4.38908	4.552	2.25375	0.660427	4.63384	1.47721	2.13791	3.92125	2.31269	2.32341	0.524686	2.85967	3.74005	2.61082	1.6867	-0.326245	1.15067
SATB1	0.928078	1.92675	1.01628	-0.0561342	-2.96455	-0.541662	2.09727	-1.23084	1.68083	0.337083	1.63433	-2.2472	1.30007	0.853237	-4.0021	-3.23252	1.52678	3.53551	2.15757	0.667792	0.564759	0.54209	2.10585	1.28936	1.9356	1.75069
S100A2	1.84602	-0.214503	1.47156	4.6693	4.56405	1.13205	-0.129316	2.26513	0.831885	2.69579	-1.08348	1.38374	1.43126	1.27901	0.822494	3.7439	-1.92845	1.7576	-2.5356	3.36887	1.28208	3.51983	-1.10069	2.19158	2.53552	2.27811
DNPH1	5.35951	5.67269	5.65518	5.4168	5.60194	4.24441	3.66976	5.36694	3.25842	4.51216	5.56233	5.14885	6.22982	4.94634	0.102107	-1.15772	3.74205	4.25794	4.29753	5.34704	5.54201	4.30953	3.92172	5.4554	6.37956	6.92668
NXPH3	0.577992	0.737297	-1.48201	-0.906716	-1.99221	-3.46165	0.914993	2.65906	0.59684	1.16523	0.875591	2.43664	0.551442	-0.10008	-1.23933	-2.48031	-1.24346	-0.127942	-4.49131	-0.0298855	-0.868803	-0.724895	-4.56336	-1.67095	-2.81013	-2.00655
KLKB1	-1.21619	-4.06042	-1.92268	-4.3752	-2.88928	-2.03739	1.08667	-4.14354	0.302337	-1.69652	-1.25406	-2.91349	-3.32601	-1.31082	-0.136428	-0.964843	-2.66305	1.45594	-2.78567	-3.65328	-4.87267	-0.985393	-3.0035	-1.84234	-3.7578	-5.22518
RARRES1	5.70877	3.5663	4.82897	4.47803	4.50215	2.30244	6.84842	4.62056	4.77943	6.25553	7.16945	5.86568	5.83481	5.13963	8.50692	8.61391	3.64175	7.07826	2.32617	3.65017	5.1156	5.7797	3.41886	4.56635	0.812819	2.88913
MX2	2.84843	1.95588	-2.54024	2.26651	1.27612	2.71698	3.51735	1.46942	2.51771	1.40227	3.76474	1.80262	-0.184323	2.78768	0.795842	0.267524	-0.556376	3.78834	-2.45537	-0.181496	3.8197	2.59725	0.176591	1.88257	-0.102044	-0.0313356
FBLN1	4.99109	3.52983	5.38078	5.85827	5.69487	3.15379	8.53387	6.42563	4.87698	6.7689	7.61055	6.95818	2.34335	6.21163	8.28143	6.22755	4.05197	4.1151	1.34434	5.75183	5.86299	6.18469	4.76014	4.80566	2.71506	3.05981
ANKRD6	-1.59708	-1.50989	-1.88811	-3.2938	-2.94337	1.64508	0.244339	-1.39982	1.08705	-1.0244	-2.13389	1.36075	-1.89628	1.63093	2.76558	1.65435	0.497617	-0.376772	0.406232	-1.39382	-2.07353	-1.86641	-0.178293	-1.77315	-3.28695	-3.2475
DENND2C	-0.33024	-1.41445	-1.38789	-0.451932	-0.201971	-3.20089	1.02467	0.895419	0.568178	-0.305068	0.743989	0.304149	-2.27822	0.0231134	3.34033	2.60688	-0.89863	-0.81947	-4.53725	-0.091413	-2.65866	-0.647856	-3.40935	-2.5722	-3.57175	-0.828552
HDAC9	0.376079	-2.16155	-0.254258	-1.20519	-1.53538	-3.49825	0.303179	-2.56251	1.38765	1.29636	2.64965	-1.90547	-2.44181	0.42664	-1.51559	-1.19047	-1.83435	1.40872	-2.96163	-1.28646	-0.507136	0.457563	-3.31544	-1.5042	-4.19237	-4.29135
GRIP1	0.465024	1.79572	0.325133	1.54754	0.67238	-0.224105	-2.25472	1.56043	-3.7464	0.151989	-2.20755	0.616678	1.24391	-0.280987	-0.771468	-2.10095	-2.34403	-4.13305	-2.78991	1.56956	-1.86552	-2.42173	-1.71178	-0.588658	0.765891	-1.62962
HOGA1	-2.67442	-1.02658	-1.03927	-0.965883	-1.03731	-4.29386	0.0872727	-3.59737	-1.78669	-4.23878	-1.12302	-2.49938	0.535963	-3.41921	1.71282	0.627971	-5.53036	-0.7619	-2.66527	-4.9508	-0.0969833	-3.72244	-3.7343	-3.24835	-3.20779	-2.70179
KIAA1217	4.90949	4.30975	2.97677	5.78991	5.76436	5.21019	2.71636	6.54907	1.7583	3.35173	2.37463	5.83237	4.6877	2.70166	2.15099	0.456859	2.04335	0.963526	3.19818	6.39925	2.1987	1.63268	2.50053	4.06624	3.6507	2.3344
SERPING1	4.41955	4.4134	6.3872	4.76542	3.37643	1.85734	8.38057	5.70411	6.46771	7.32068	6.64375	6.65455	2.2211	6.6195	7.30281	5.249	4.48131	6.90219	2.47379	4.01041	6.16435	6.90681	3.9808	4.63404	1.86073	2.89153
TCF7L1	0.789854	-0.00520742	1.22956	-0.464291	0.605703	1.76888	3.64351	0.416191	3.54083	2.90753	3.49454	1.11305	-0.948333	3.11564	0.418687	-1.23887	3.41675	1.45883	-1.28419	0.19536	0.941978	0.868118	1.03615	-0.17767	-1.96297	-1.96213
CES2	0.223941	-2.09975	0.733762	-2.98535	-0.601978	0.363081	2.18774	-3.74248	1.19216	-0.546347	1.07132	-0.127326	0.358666	0.895822	0.752672	0.453892	3.41422	0.776626	3.1215	-2.14056	3.12777	-0.549496	3.43861	0.82972	-0.0829105	0.320034
FERMT1	3.86083	5.0584	4.33498	4.26319	4.24403	3.46169	2.34454	5.15503	1.90954	4.5427	3.18442	4.1336	4.10403	3.10731	-1.60792	-2.61407	3.54622	1.70006	3.95429	3.83254	4.02748	3.30625	4.20031	4.04255	3.9388	4.95253
SLC12A2	6.30477	6.94154	5.78631	7.62167	6.75745	7.04603	3.68466	6.4199	4.33698	6.27736	4.94648	6.79248	6.52846	5.01999	1.36289	-0.325982	5.1907	3.52866	4.94176	8.23732	4.81583	4.61367	5.58946	6.33055	4.87365	4.81812
GZMB	-0.0654201	-1.08336	2.83203	-0.153081	0.725767	2.96754	2.44266	0.392878	1.87124	2.6922	-2.88824	-0.732373	0.195889	2.00812	0.183226	1.55938	2.10141	1.36093	2.08643	3.01627	4.06695	2.84889	2.6777	1.51294	-0.599574	3.07544
ZNRF3	2.70372	3.11927	0.448975	3.32648	3.21101	3.48872	0.0853431	4.01625	1.00081	1.73196	0.307405	3.69527	3.16273	1.09248	-2.6197	-3.14284	1.02399	-0.0193721	1.25043	3.79116	0.13097	-0.354702	1.48632	2.29917	2.18506	1.85615
WIPF1	5.27933	2.634	3.89621	3.04083	2.44046	1.19436	5.6042	2.59981	6.20546	5.89508	5.0313	2.84285	0.0730798	5.37074	2.41506	1.71254	4.1468	5.74827	1.25341	3.66194	2.92385	3.84303	1.93498	2.40731	-0.384151	2.67378
EPS8L1	3.58852	1.14916	1.33391	3.87593	3.73143	2.92936	-1.01451	4.85068	0.188186	1.40631	-1.11525	3.55008	1.94101	1.10345	1.29662	0.669399	0.608677	-0.747415	2.08108	3.93454	2.22395	1.38153	1.30645	2.0281	0.633589	0.140033
TSPAN15	5.95078	6.10038	5.79139	6.15628	6.29008	5.87007	3.30258	6.28466	5.39743	5.8419	5.18683	5.28354	6.39446	6.3761	0.454744	-0.44878	6.78518	2.96447	7.12875	6.53873	7.05711	5.22905	6.99946	5.86083	6.27514	5.79712
PIK3R6	-0.0813543	-2.39057	-0.376002	-2.80269	-6.11924	-2.08321	1.83506	-3.3231	-0.610797	-2.1991	0.599718	-1.28271	-4.67775	-0.778417	-1.15643	-2.16455	-1.34395	2.37477	-2.35678	-1.80628	-1.37004	-0.792434	-1.52311	-1.99648	-4.57136	-3.33156
PPARGC1B	0.403617	1.15322	0.49417	0.221407	-1.47776	0.970743	-0.093993	-0.509081	1.80912	1.02957	1.02643	0.123547	0.306507	1.03124	-4.8277	-4.75306	2.46191	-0.136961	3.75435	-0.264142	1.04304	-0.159183	3.01786	0.409755	0.443893	0.310573
FAM131C	-1.25367	0.258627	-2.91113	-1.55228	-0.198244	-3.73638	-1.69565	-0.527726	-2.79121	-1.28513	-2.34117	-0.890094	0.604736	-0.949865	0.00327121	0.422319	-4.51999	-6.00733	-3.83781	-0.545058	-5.60559	-2.76369	-4.24341	-2.32062	-2.60571	-2.55775
GPM6B	1.56061	-0.0809224	2.68161	-0.106535	-1.38311	-1.40474	3.02298	-1.10909	3.5079	2.60165	1.24355	-1.06252	-3.50188	1.50391	-0.129163	-2.38559	0.865056	2.01675	-0.315228	0.117788	-0.701907	-0.634424	0.752303	-0.194166	-3.39747	-0.94636
DSTN	5.45809	4.73878	5.68046	5.787	5.48213	4.79614	6.45572	5.41176	10.5877	7.6902	8.45707	5.09774	5.21478	9.51573	6.4419	7.29152	9.17089	5.09604	4.04988	4.95993	7.09446	6.79853	5.54637	5.99859	5.34961	5.70254
ITGA6	5.06411	6.97188	5.06729	6.33467	4.58912	6.0798	3.94439	5.66571	3.47647	5.59724	4.07765	5.91569	5.72173	4.9373	1.09289	-0.950224	5.66627	2.20657	6.5214	5.24177	5.51169	4.30104	6.28219	4.89808	5.59508	6.54041
INHBA	2.493	3.84989	3.30239	1.87871	2.13949	-0.0600964	4.61781	2.24725	2.49266	5.16635	4.93233	4.73769	1.17732	3.20697	4.11182	3.02354	2.38973	1.70254	-1.66248	1.32929	1.91411	4.18246	-2.38598	2.38029	1.59334	2.01098
HSPA12A	-3.17516	-1.94031	-1.15567	-2.87935	-2.58727	-2.61639	0.887744	-2.98759	2.00928	0.903779	0.0137124	-1.40366	-1.9403	1.41111	-1.39725	-2.80074	0.862154	-1.74724	-2.89296	-2.69812	-1.01773	-2.02005	-1.7338	-2.87403	-3.63038	-3.57176
ERG	-0.416947	-0.189401	1.24788	-0.40181	-1.92565	-1.50731	3.57662	-2.25039	1.73807	2.65851	3.95296	1.65604	-1.73092	2.13497	3.68475	3.04467	0.353854	1.90352	-0.499714	-0.249354	0.582113	1.24097	-0.113322	-0.179596	-2.20099	-0.404409
KIAA1211L	2.88945	1.34941	1.1062	1.32651	0.939031	0.907552	-1.72628	2.75473	0.598289	-0.674911	-0.297867	1.33744	3.05147	0.378179	-3.07541	-2.74202	-0.50715	0.0589953	-3.94372	2.22135	-1.39163	0.814411	-1.95636	1.92134	0.313571	0.648594
IL13RA2	-0.696922	-2.0943	-0.860992	-2.12868	-1.73649	-3.09068	3.81616	-1.32929	-0.287478	1.53096	-0.0032931	-2.62917	-2.99506	-1.75744	0.0503554	0.77623	-2.83459	1.85585	-1.51717	-1.60796	-0.0615441	-0.0333554	-1.42038	-1.57555	-4.42501	-1.87509
KAZALD1	3.81418	3.04384	0.450285	2.03158	2.33287	4.02246	0.86796	0.863788	-1.73089	-0.1936	1.67768	3.10772	3.65908	-0.324242	-0.275973	-0.805542	1.76544	-0.643489	1.35739	3.10594	1.65612	1.13216	2.33102	2.83461	3.04482	1.81771
LAT2	3.29396	1.67275	3.03027	1.51087	0.913699	-1.83028	3.9881	0.122845	3.09548	3.89523	2.65191	2.20512	-0.612874	2.3877	3.49893	3.58278	0.405633	4.84635	-1.41587	0.856117	2.07243	3.3972	-0.938882	1.3528	-0.523521	0.772426
MFSD7	0.477377	0.642341	0.295617	-0.0452081	-1.0205	0.202788	3.65136	-0.424808	2.07189	2.78358	2.36013	2.48271	-1.98611	1.54914	1.41893	1.04173	-0.875825	2.58046	-3.91224	0.518505	1.27269	1.5856	-3.33351	-0.303953	-0.561211	-1.72407
FOS	7.67069	9.28132	8.89553	8.61873	8.63451	9.53466	8.63503	7.92425	7.74277	7.18448	3.44228	4.56435	6.99726	6.7	6.24856	4.97965	6.11762	5.46306	9.57914	5.8122	8.8425	8.70727	5.88742	9.38052	7.95135	9.15123
SLC1A4	3.13548	3.1631	2.63038	3.92094	3.96159	0.169745	0.875756	6.50259	2.71941	2.30353	2.85322	4.59911	2.13297	2.89275	0.883112	-0.180636	1.25827	1.21719	-2.56069	4.25122	1.61736	3.13471	-0.404076	0.677729	1.55589	1.75242
ZNF662	-0.496716	-0.288711	-0.25252	-2.03071	-3.49293	-1.87543	1.42714	-3.95624	2.60336	0.66841	1.86705	0.00842952	-0.317265	1.20918	-2.77667	-2.96929	1.7024	0.117788	0.804904	-2.17361	-0.00756219	0.329812	0.556611	-1.36915	-0.141413	-0.755412
WAS	1.97681	-1.49465	0.850007	-1.36141	-1.80637	-1.45212	2.03946	-1.94733	0.910971	1.50878	0.472924	-0.773558	-4.51134	-0.720826	-0.733085	-1.14507	-1.99051	3.36606	-2.83852	-0.56647	0.16945	0.765789	-1.67259	-1.07249	-3.6483	-0.832953
GCNT1	4.30268	5.49706	1.75898	3.38637	3.87252	2.67402	1.86265	4.43165	1.1385	3.45016	0.965138	4.06363	2.90654	2.05192	-0.754565	-0.140196	0.0772156	3.76742	-0.784222	3.12682	1.05735	1.33996	0.661239	4.05075	3.19212	1.69545
KLRG1	-0.280107	0.475178	1.0345	0.116498	-1.01615	0.762978	3.97918	-0.736773	3.29733	2.17701	3.4539	2.76104	-0.564094	1.61523	3.10077	3.90964	-1.15987	3.83041	-1.05697	1.07187	0.924267	3.31619	-1.15805	0.996042	-1.39738	-0.492955
GNA14	0.236462	-0.9791	-0.289704	-1.00859	0.0620803	-0.658504	2.08172	-3.95478	1.78296	1.36506	3.01647	0.841828	-0.205555	-0.334751	-3.54052	-3.78584	-0.838729	0.995188	-0.767816	-1.36888	0.779218	0.563851	0.02946	-0.328154	-0.604731	-3.31045
NEURL1	0.552446	1.52724	1.74552	1.66464	0.161281	2.60865	-1.47494	-0.680525	0.441048	-0.279319	0.7824	-0.233159	3.05151	0.687786	-2.45026	-5.72379	1.9726	-0.484281	1.92158	1.2972	0.839363	1.18718	2.63011	1.87968	2.15348	-0.654742
SELENBP1	4.13457	5.70194	4.90955	3.65148	4.38112	5.43211	3.57668	3.50208	4.76617	4.25474	4.86963	6.16517	5.89223	3.14729	3.8818	2.91398	8.45621	3.10117	8.55088	4.27685	8.1186	4.94107	8.97874	4.23446	6.03013	5.20043
MRC1	-0.862706	1.38032	1.91458	1.47572	-1.77897	-0.550824	5.32145	0.402853	3.29408	4.38168	1.6586	3.3672	-2.21917	1.39342	0.9761	1.32447	0.698725	2.60583	0.450253	0.147216	1.98895	3.15332	-0.00277264	0.832833	-0.20363	-1.68168
FGF13	0.686424	-2.27501	0.976848	-2.12797	-3.17302	-3.29704	0.182133	-2.56079	1.9848	0.196884	-0.198206	-2.97609	-2.82049	0.534878	-1.73769	-4.39389	0.710076	-0.0291861	-2.13586	-2.63181	-0.194415	-1.92786	-0.443254	-1.55108	-3.99713	-3.46476
RCAN2	0.995629	1.3017	1.14625	-0.548333	-2.06981	-1.18951	2.17047	-2.93252	1.91261	0.615915	3.77283	-0.487454	0.44945	2.08233	3.24451	3.482	3.37507	2.89309	0.110764	0.163086	3.04774	2.24337	2.41533	0.563256	-0.988101	-0.547413
COL3A1	5.11685	7.30339	6.93062	7.57375	5.11601	5.80163	10.8672	5.60183	8.50404	9.64743	10.2366	8.945	4.16778	8.41967	7.4461	4.90067	6.58489	6.84622	4.9572	6.18973	7.7689	8.60679	5.6195	6.06166	4.69285	5.92605
HIC1	1.21359	0.130694	1.94036	0.692882	-0.344842	0.237955	4.67152	-1.22904	2.60836	3.16882	3.55542	2.9998	-1.05224	3.37148	5.16863	3.50915	2.29992	3.12744	1.03202	0.774292	1.96828	2.25722	1.72669	1.18158	-1.4383	-0.186671
B3GNT7	2.1352	2.41981	4.23395	2.52256	0.558415	0.777578	1.64863	1.26702	1.17956	2.10588	2.8157	1.4207	1.63581	1.47831	-2.89053	-3.4404	3.04586	1.94962	0.531119	1.99546	4.03259	3.56189	3.56585	1.51096	0.7322	1.36004
EML5	0.0300394	-0.0959283	-0.0689267	-0.498281	-1.99475	1.22437	-1.35939	0.337654	0.300428	0.0924916	-3.00196	1.16484	-1.01614	-0.528438	-5.03668	-6.43998	0.727616	-0.24488	0.97345	0.48356	-1.55354	-0.753655	1.04288	-0.00514661	-0.446781	0.561448
NRXN2	-0.344333	0.899029	-0.640598	-1.65098	-2.59441	-6.25996	-1.07585	-3.66625	2.0944	-0.109598	-0.581046	-0.91899	-1.70071	0.876071	-1.05543	-1.74642	-0.639514	0.645526	-2.37298	-4.51947	-0.978145	-1.03677	-0.775439	-0.983438	-1.52914	-2.60221
FOXF1	2.05162	1.82307	2.22687	2.54882	0.92917	1.01952	2.0702	0.975505	4.33044	4.96048	3.09598	0.908828	0.862923	3.66201	-2.3176	-2.72314	3.70569	1.01215	1.89564	2.24671	2.85801	2.08234	1.76077	1.68813	-0.0701696	1.54952
ITGAL	2.05005	-0.825159	0.587653	-0.890204	-2.29231	-2.2343	2.35074	-1.59685	1.73485	2.35099	1.32855	0.814952	-3.03343	0.28539	-0.778769	-1.2052	-2.55037	3.14372	-2.48137	0.546492	-0.859494	0.822306	-1.32507	-1.26035	-3.6115	-0.465241
CDH11	0.862876	1.5738	2.07237	1.30495	0.0916931	-0.049999	5.46004	0.168437	3.01468	3.78167	4.68798	3.82698	-0.610508	2.90882	3.38892	0.438144	2.41139	2.97958	-1.23198	0.585962	2.15868	3.11807	-0.2959	1.18896	-0.822702	0.297649
SDR16C5	3.092	3.38724	4.6638	2.75973	3.73643	4.33339	3.57958	-2.18517	3.42339	3.6194	4.80083	3.76343	4.81523	4.74928	3.40633	4.00894	6.12025	4.19967	6.44685	2.73287	6.72746	5.23809	6.71295	4.73199	4.27133	5.0278
SEMA4G	1.92672	2.46908	2.04761	1.98991	2.03611	3.55649	2.10695	2.52028	2.11621	2.21994	1.81186	3.27327	2.76428	0.644752	0.318531	-1.06758	4.88861	0.999776	6.08702	3.53867	4.31083	2.52822	5.70734	1.05427	2.79119	0.405317
NPTX1	-2.26691	-1.90174	-0.0540642	-1.34903	-2.18116	-3.14871	-2.52733	-3.95674	1.46904	1.03908	-2.18962	-1.3176	-2.29375	-1.04977	2.82598	1.79106	1.29399	-4.66177	-3.00775	-1.43337	-1.83677	-0.503771	-0.345092	-1.69992	-3.3064	-1.72463
RPS6KL1	0.461225	0.490293	-1.78061	-0.968241	0.737972	0.157522	-1.97197	0.417121	-3.75333	-1.57921	-1.48399	1.31669	0.997979	-0.762392	2.48167	2.19714	-3.19058	-2.68285	-1.88811	-0.756862	-4.25741	-2.71921	-2.49926	-0.111302	0.77468	1.13981
GPR83	1.71279	-0.884474	0.124791	1.92275	1.92787	2.38777	0.266817	2.16005	0.490734	-0.762493	0.680513	-1.20128	0.351922	0.604707	-3.11518	-3.95503	-1.41548	1.46076	-2.75285	3.25789	-0.850655	0.90127	-1.88592	-0.342252	1.29122	0.191411
IL12RB2	-3.89113	-6.04911	-1.80017	-4.37121	-4.63295	-3.21696	0.917867	-2.80992	-0.0453853	-0.428265	-3.07146	-4.20832	-4.8815	-1.00605	-2.36706	-1.75164	-1.04366	-0.781859	-1.12235	-1.69728	-1.76846	-1.12914	-2.31892	-1.81505	-5.75823	-1.89945
SORL1	3.56348	3.10393	3.70921	3.15518	2.39996	3.42579	3.17963	2.79925	3.08611	4.30081	2.28402	3.2708	2.56557	3.14527	-2.39422	-2.83503	4.35906	3.60583	4.45177	2.86671	3.72235	2.5087	4.89422	2.40096	2.52402	3.51716
CA11	-0.629628	-2.43775	0.640862	-2.70422	-1.3653	-1.86845	2.11405	-1.88842	2.41614	1.26895	1.45794	0.310968	-1.2414	1.40835	3.05283	2.42891	2.17064	0.716763	-0.970659	-1.00916	1.24784	0.878906	0.427005	0.218397	-3.15624	-1.80791
GPD1	-0.687753	-1.0749	-1.67885	-1.3376	-0.786502	-0.17276	5.98894	-1.32286	0.0325241	-1.18427	2.3495	0.304067	0.774604	1.36258	-1.11815	0.976246	0.247138	2.69774	-1.79797	-1.60405	0.770533	-1.77522	0.552643	0.265737	-0.260727	1.49407
PDGFRL	0.899671	1.05798	1.25038	1.49557	0.991659	-3.19736	4.47908	0.146225	1.68615	1.92443	4.27733	2.44573	0.872994	2.02318	2.2832	1.91373	0.904226	2.77075	-2.6856	1.46533	2.52675	3.15698	1.00237	1.19985	-1.90362	-0.76403
BICC1	-0.559832	0.396335	1.16858	0.605134	-0.665862	-0.244089	3.60198	-1.28657	1.93416	3.44717	3.42565	1.8887	-1.64325	1.76922	4.81127	3.48844	-0.0184703	1.47865	-1.31549	0.11812	1.08891	2.52082	-1.08647	0.485695	-1.39131	-0.01146
MYO10	4.55859	5.36701	4.50966	5.13232	4.73518	4.85093	2.79581	5.89383	1.67889	4.80436	3.31587	5.62819	3.86514	4.29573	-0.46117	-1.34066	3.55256	1.77224	3.91618	5.47404	3.04839	2.51127	4.21893	4.13167	3.76794	3.56487
LAX1	0.428228	-2.69692	-0.150718	-2.09868	-3.29575	-2.78786	1.16436	-3.39204	-0.234111	-3.43327	-0.656394	-3.891	-0.615532	-3.58083	-4.01281	-3.75349	-1.71924	2.95491	-3.29107	-2.01427	-1.53927	-0.853621	-0.709993	-1.14352	-4.32936	-1.41574
C10orf35	1.29717	0.304885	-0.147213	0.538906	1.17992	0.599165	-0.483757	-0.126713	2.54081	0.218471	0.135653	0.48871	0.986338	2.82471	3.36337	3.45817	0.645019	-1.1037	-1.26162	0.748453	-0.261915	-2.07862	-0.755381	1.07825	-0.735841	-4.05963
COL5A2	2.67301	4.81605	4.42718	4.66902	3.088	2.11335	7.03035	3.48967	6.25121	6.90819	6.91833	6.11164	2.10724	6.50005	5.88052	3.94301	4.21227	3.36307	0.835706	2.96511	4.48825	5.4196	1.9725	2.76081	2.35269	3.15431
GPRC5B	1.22788	1.31569	2.39476	2.64066	0.909942	-0.325532	3.42939	1.36725	4.66013	4.76982	1.87659	1.66652	2.03897	3.95651	1.29899	0.704527	3.51073	1.62817	-2.00306	0.586645	1.1895	0.966829	0.00620465	1.34674	-1.26037	-0.518749
PTGER2	-1.037	0.15941	0.640121	0.828502	-0.304731	0.611002	0.140896	0.0626191	0.848165	1.70421	-0.462006	-3.89152	-1.29204	-0.309849	-4.69714	-5.04545	2.45219	-0.486028	-1.3724	0.0716254	0.316354	0.188401	-1.10069	-0.610462	-2.36159	-0.163756
PCOLCE	3.49225	2.99901	4.66707	4.25991	2.78505	2.03265	8.09431	3.33921	4.89828	5.99161	6.70019	4.80231	1.43411	4.63193	7.64828	6.09778	3.42151	5.20351	2.21474	2.85514	4.90815	5.21193	3.54863	3.47315	1.11655	2.14039
MFAP5	1.13357	0.577586	3.26659	2.6391	0.772604	0.339445	4.87901	-0.736033	1.77547	3.56409	4.15018	2.57093	-0.521761	1.85393	4.50351	3.73567	1.36879	1.33106	-1.08878	0.79922	3.47098	2.55587	1.41364	1.99168	-0.448005	-0.393971
MAP2K6	0.679793	0.0484734	1.44801	-1.18381	-3.99077	0.255464	0.786922	-4.85395	0.850183	0.200818	1.34722	0.463016	0.859977	0.506673	0.798432	1.04922	2.43515	1.56446	3.1791	-0.866497	3.14633	1.28078	3.09344	0.409233	1.48266	1.12751
CDNF	-2.45311	-2.58962	-1.13479	-4.50322	-1.9016	-2.19038	0.0258084	-3.67535	-0.792602	-1.99853	-1.87635	-2.60163	-1.90713	-0.689795	2.28009	2.83487	-1.0648	-1.58103	-2.89607	-4.75056	-1.84438	-1.4188	-2.12708	-1.58435	-3.33504	-4.33174
CFL2	1.81983	1.81352	2.65471	2.07954	2.45774	1.31732	3.88997	2.03052	7.37485	4.61502	4.58113	3.15791	1.89513	6.30701	4.49628	4.0733	5.64668	2.74093	1.02941	2.20426	4.02085	3.26261	1.70346	1.96731	1.52942	2.19548
STC2	-1.48221	-0.300349	0.397825	-1.06592	-1.58918	-1.52283	2.58713	-2.45965	1.85382	1.79238	2.49453	1.07099	-1.42942	1.45754	-2.85987	-3.84887	-0.255837	-1.09576	-3.3477	-2.29347	-2.04148	-0.668336	-1.58666	-1.47629	-2.11179	-0.592941
CCSER1	0.490108	1.51463	0.914955	1.36585	0.904126	2.33937	0.188971	1.02602	1.01527	1.11811	0.814805	2.35356	1.71269	0.185055	-4.14758	-5.88297	1.23417	0.21242	2.26938	1.62633	2.36975	0.845711	1.66618	0.179613	0.729279	1.57579
CD96	-2.38706	-4.60021	-0.629334	-2.72028	-1.6694	-1.52161	0.938399	-3.03758	-0.0285194	-0.431855	-1.63915	-3.02095	-3.64597	-2.24507	-2.95572	-2.13823	1.18135	1.88831	-0.394775	0.191057	0.492571	-0.269095	2.13425	-1.82858	-2.27998	0.0785142
SLC38A1	4.37514	5.71293	5.01164	5.33162	4.19492	4.44745	2.97522	5.4521	4.98318	5.69406	3.75263	5.39908	5.08584	4.79131	-0.42331	-2.4917	3.52218	4.47663	3.17977	5.27872	3.86733	3.70069	3.60379	4.60227	4.33773	5.0802
RNF157	1.86686	2.27326	1.36125	-0.487848	-1.09657	-2.14636	2.56984	-0.382269	2.99565	3.00166	1.82166	0.841643	-0.426381	2.94747	-0.640537	-1.69912	2.06825	3.04367	-1.47083	-0.396255	0.025128	0.37215	-0.644323	1.21876	-1.22714	1.33294
TTC28	-1.5594	-1.62121	-0.292841	-1.90933	-3.02006	-0.547913	1.37476	-2.90991	1.51596	0.931865	1.16671	-0.262666	-3.41254	1.29246	1.45325	0.53038	0.523723	-0.36144	-1.39142	-3.40268	-0.991748	-0.35569	-0.971224	-2.71669	-4.15556	-3.01111
FBXL7	0.778453	0.399127	1.24895	0.0600197	-1.45364	-1.99305	3.99634	1.8845	2.95928	2.51811	3.42757	1.64496	-0.775841	2.75477	4.06242	2.91611	1.95369	1.13169	-0.419102	-0.439923	1.54654	1.56806	0.189742	-0.264575	-1.96278	-1.30257
KCNS3	0.0595491	-0.605828	0.79088	0.92008	1.29268	0.882432	-0.811217	0.840886	2.89217	-2.08427	-2.40332	-3.94816	0.966645	-0.0295218	-3.06437	-3.60712	1.12307	-0.865774	-0.37229	1.16691	1.3894	0.160662	1.63169	-1.33345	-3.09894	-1.86337
EPB41L4B	3.18889	3.67617	3.58177	3.87602	3.45962	3.3425	1.17035	4.02657	2.88774	3.31724	2.57971	3.71183	3.57304	2.36337	-1.85555	-1.62891	4.92429	0.555875	5.98044	4.32848	5.00044	2.53911	5.59414	2.87829	3.07048	2.48851
AVIL	0.483591	-2.95646	0.53437	-0.0970188	-1.55354	-1.61911	1.72405	-1.0856	-0.534972	1.18191	0.00785569	-0.343526	-0.940863	0.326089	4.30418	2.5686	-0.885404	0.0596875	-3.10312	-1.51182	-2.05542	0.0439324	-1.3357	-0.589685	-3.17007	-3.18382
PTPRK	3.311	4.0787	4.06193	4.99002	3.3073	4.00948	2.29434	5.26197	2.35401	5.1838	3.10402	5.0036	3.82267	3.39197	-1.81612	-2.08343	4.36506	2.07764	4.99639	4.86514	4.32602	3.30049	4.92533	3.57177	3.44771	2.48387
MARK1	1.72496	2.78437	2.49306	2.68458	2.05321	2.58451	4.09362	2.995	2.09508	3.25099	2.75661	2.89852	2.60331	2.32977	-4.07619	-3.4706	1.83531	0.0976108	1.60935	2.93603	1.43399	1.47123	1.83197	0.879165	0.746029	1.42574
CST7	3.10783	2.33588	1.94431	3.49757	3.95963	0.913853	1.07453	4.44447	2.10082	2.08925	1.86905	1.78904	1.36214	2.16564	-2.70083	-2.69554	0.12577	3.03211	-1.57587	3.47927	1.68292	2.56503	0.200592	2.6107	1.83591	2.62437
ABHD12B	2.17431	0.192813	-1.86292	1.81657	2.11617	-2.51738	-0.143233	3.1567	-2.03732	-1.55395	-2.25483	-2.0641	0.746794	-1.90561	-1.97359	-2.16085	-1.52277	-1.81466	-2.24502	0.550566	-2.72046	-2.50304	-2.80279	0.357169	-0.316792	-2.99885
DOK3	2.84518	0.263371	2.01098	0.406134	-0.9994	-0.745607	2.18335	-0.308841	2.44063	2.47384	2.0622	1.02851	-1.11612	1.36745	0.0343284	0.805705	-3.49847	3.70494	-3.20391	-0.0284561	0.978401	1.71796	-2.19632	0.443087	0.27652	0.125598
A2M	0.732634	0.394119	1.82645	1.36787	-0.618037	-0.858389	3.8821	-2.04273	4.23134	3.49935	2.85017	2.52081	0.63594	4.52055	1.36577	1.41017	3.5814	2.65145	-0.516607	-0.0968861	1.94137	2.42111	0.613569	0.835399	-0.0341204	-0.999836
KLHL29	0.2027	-1.54295	0.323474	-1.53962	-0.719262	1.37668	1.78857	-0.200651	2.82053	1.47868	2.06525	0.700928	-1.03283	1.65206	-0.589574	-2.72025	-0.355271	-0.04265	-2.30743	0.450686	-1.00528	-1.02605	-1.8268	-0.699204	-4.80786	-2.10867
RNASE4	3.27541	1.36158	3.62353	3.27782	4.81161	7.54031	5.08059	-0.405253	5.5847	3.99025	4.00342	7.47902	2.5964	4.35258	5.41827	4.79827	6.41372	3.06665	6.99109	3.40119	5.55834	3.31851	6.77951	3.50658	4.49176	4.19411
CECR2	0.407527	-0.143684	-0.77325	-2.30364	-4.61941	-4.83396	-0.770636	-2.95119	-1.53212	-0.471873	-2.09294	-3.17655	-2.78467	-1.34119	-5.69438	-6.52144	-2.21542	0.771818	-0.655785	-2.1608	-2.7953	-2.45283	-2.99503	-2.18631	-2.96403	-0.300653
REEP2	-1.28835	-3.94285	-0.938838	-1.15608	0.575719	-1.39124	-1.03878	1.15353	1.084	0.917241	-0.290399	-3.49069	1.1654	0.953764	0.00493998	-1.05793	1.10619	-1.9349	-4.04358	0.675762	-2.27718	-2.27714	-1.07123	-1.72521	-2.33512	-4.27375
CH25H	2.48524	3.76436	5.83265	3.82316	2.46432	2.32933	6.91703	0.67295	4.5033	6.89138	3.1445	4.4381	2.02031	2.23731	2.7435	0.851359	1.34515	1.80379	1.71978	3.03105	2.73136	4.27125	-0.843298	3.72379	1.24906	2.81797
PLAUR	2.79046	5.62012	6.00391	6.57337	4.40671	4.89243	5.31815	4.96012	4.41481	7.46413	3.44151	4.44577	3.47805	5.80043	1.22407	0.87508	1.52557	2.1971	4.32284	4.97188	3.78476	5.2869	1.62264	4.2688	2.99339	6.55269
TSPAN32	0.194995	-2.42157	-2.22106	-1.57697	-0.378537	-4.5926	-0.447426	0.36344	-3.9247	-1.91265	-2.40643	-0.884024	-2.08989	-1.48853	-2.96233	-2.26519	-3.47996	0.70217	-5.21517	-0.281784	-2.69161	-1.52573	-5.27381	-3.17497	-3.04776	-2.31982
TSHZ2	0.577866	0.181179	1.7122	0.0172521	0.642896	1.16873	4.2004	1.50414	4.14923	3.74307	3.78693	2.80843	-1.99694	3.50084	1.87446	0.641629	2.62988	1.95415	-1.82775	-0.314228	1.56398	2.09969	0.939889	1.30126	-2.20909	1.66641
ARHGEF16	3.44915	4.30277	4.07248	4.33922	4.12416	4.23857	1.60226	4.51111	1.94875	3.32078	1.52857	3.71422	4.25762	2.18522	-1.0585	-1.44396	4.20964	1.19087	5.09801	4.90975	4.74191	3.15135	4.90463	3.51938	3.49412	3.94143
FUOM	2.76928	4.50415	3.65074	2.11135	3.96921	-1.82753	3.64863	1.56319	3.11325	2.5636	4.56324	1.8351	4.66743	2.81395	5.35936	5.95353	6.11119	4.52051	5.70544	3.29205	5.58668	4.71313	6.74294	2.8218	5.52607	4.50533
LIX1L	1.38374	0.427821	1.53506	1.54663	0.647416	-0.54692	4.25495	0.316609	4.04294	3.74953	4.24198	2.32126	-0.70356	3.47325	4.58432	3.74165	2.46176	3.30631	-0.0270501	0.541832	2.48563	2.58037	1.11636	1.20958	-1.81941	0.550989
SPI1	3.32508	1.87826	3.46845	2.36956	0.957164	1.48975	4.89466	1.57007	4.15739	5.02235	3.8843	3.13262	0.307685	3.2769	2.44628	1.41799	-0.28679	5.02928	-2.14739	2.91176	2.8533	3.43872	-0.503744	1.72446	0.652647	1.79207
RAC2	6.35159	3.00752	5.46715	3.28259	2.75811	1.26758	5.33203	2.68595	5.07928	5.62843	4.19398	3.10943	2.48699	3.95216	1.22765	1.48044	2.33645	7.73346	0.916836	3.58866	4.50733	5.03977	2.8015	3.52911	1.66484	3.38323
LRRC3	-1.0128	1.01942	2.09722	1.59484	1.06004	0.478547	1.30108	3.37617	3.27592	3.22085	-1.72716	1.92751	1.31343	3.23154	2.63579	1.40871	1.80859	-1.61799	-1.00458	2.20378	-2.73071	-1.87998	-0.182565	-0.428915	0.642517	1.76466
ADRBK2	4.33451	0.987961	3.07041	2.21285	1.86071	-0.276569	4.52854	2.56637	3.5724	4.28019	2.8652	1.83494	-0.511785	2.69346	2.56508	2.00682	2.54305	5.32033	-1.621	3.03322	1.5128	3.07389	0.497331	0.689693	-1.44739	0.423094
TNIK	1.47644	2.41726	1.39933	1.53144	0.926136	0.088318	0.745478	0.1725	2.81603	3.15275	2.14792	2.10522	2.14248	2.56413	-4.2521	-4.44737	1.79276	2.10528	1.74003	0.644678	0.703491	0.505434	0.987757	1.71464	1.5762	1.74249
MEOX1	0.0250855	0.174342	1.21053	1.25381	-1.65267	-0.483967	2.80868	-0.98575	1.76985	4.21444	1.83855	1.61607	-2.48195	3.33758	-1.85892	-1.22298	1.29039	2.19752	-0.230541	-1.46405	1.70742	1.83637	-0.304836	0.508388	-1.86555	-1.51608
ARHGEF19	2.20592	2.27079	0.395458	2.84707	2.85196	1.38952	1.11149	3.12747	-0.811617	0.42752	0.612334	2.29003	3.15665	-0.0550052	3.3355	2.90344	-1.61739	-1.44307	-2.22122	3.06426	-1.53877	-0.596132	-1.06745	2.59684	1.38792	0.846906
SLC2A13	1.47595	2.56713	2.37607	0.189097	-1.09048	2.95213	1.10756	-2.62546	1.65232	2.10372	2.01765	2.69894	1.55971	0.627476	-3.2135	-2.36654	2.58356	1.0404	3.89977	1.3725	3.18065	2.14154	3.30046	0.700351	1.19895	2.24332
CDC42EP3	2.90717	2.53219	4.36713	2.83371	2.22809	2.14491	5.34736	2.38579	6.42528	6.42053	4.72632	4.33585	2.54865	6.06591	6.47906	5.5228	5.92787	4.02041	0.947935	2.12544	4.12259	3.89691	2.13756	2.63697	0.638306	3.27014
MST1R	3.41839	3.48867	1.9803	4.07593	3.41901	4.40925	1.16062	3.6667	1.92327	3.05983	2.36668	3.93065	3.15187	2.073	-2.32346	-2.50426	2.82028	0.497076	4.21642	4.21454	2.42344	1.76472	3.6941	2.84285	3.05952	1.91178
GRIK5	-1.59491	-2.71654	-0.457748	-1.86594	-3.81515	-3.97901	-0.474819	-3.73798	1.73367	1.19908	0.30541	-2.00227	-3.47811	0.978796	0.33682	-1.05436	0.683301	-1.44599	-1.71207	-3.43815	-1.00018	-2.36865	-0.852805	-3.12677	-3.64031	-2.98923
ITPKB	2.29504	0.622143	2.02236	-0.0146876	-0.461798	0.0804121	3.70085	0.746055	4.48648	3.79433	3.12812	1.07538	-2.1058	3.35581	0.29112	-1.61187	2.39767	3.26674	0.844747	0.0793201	1.53499	1.44375	1.8046	-0.0112666	-1.51313	-0.53565
GSTM3	2.07336	-1.09612	1.00802	4.40601	2.39307	-0.406491	3.59499	-1.13071	4.15493	3.10697	2.00123	1.14731	0.567341	3.44542	5.22583	6.04114	1.87896	1.30603	0.779915	0.517387	1.44029	1.82811	1.39595	1.15594	2.20338	-0.373107
SLC45A3	-0.0446559	0.693569	0.891443	1.62897	0.773245	1.28048	2.29031	-1.30584	1.07562	1.94924	0.895264	0.494149	0.746072	0.685142	-4.46461	-5.42032	-1.52766	0.124249	-1.99074	1.54465	-0.80647	-1.35804	-0.483793	0.334866	-0.010114	-0.429574
EGR1	6.0252	7.59009	7.166	7.6097	6.56695	8.06792	7.46608	5.6564	7.29186	7.0866	3.15334	4.24872	5.42231	5.81634	4.12016	2.64545	4.47191	4.85446	8.07142	4.9952	6.0554	6.5788	1.761	7.83946	4.46616	6.86096
CACNA1D	0.352939	1.28695	0.492458	0.834112	-0.56371	1.91981	-2.53688	-1.80848	-0.0375132	0.986484	1.53867	-0.485729	0.965042	0.394459	-2.67303	-4.88993	-0.331113	-3.74353	-1.49912	1.53406	-2.46484	-3.11502	-1.82982	0.790814	0.460837	-0.560279
JAM3	2.51655	0.638574	2.06786	3.09951	3.85249	-0.92238	3.17139	3.3098	4.1021	3.4665	3.58116	3.60164	2.05481	3.80058	4.756	3.64192	3.78051	2.0257	-1.12759	3.53452	1.87241	2.28119	0.575961	1.10753	-1.06745	-0.362336
TMEM163	-0.285551	2.03611	-1.47934	-5.37464	-4.29831	1.11724	-1.81957	-1.07018	-1.27208	-3.07314	-1.75276	-2.97866	0.126695	-2.7069	-1.74783	-1.17525	0.823146	0.712041	0.810838	-1.08341	1.42505	-0.478991	0.474234	-2.2492	-2.23182	-1.97131
CD19	4.31795	0.0919773	2.35466	-0.807167	0.186222	0.161539	1.35904	-0.964024	-1.58204	-0.479927	-0.742043	-0.267508	-0.442262	-2.04531	0.488165	0.696706	-0.52655	5.17925	-1.59887	-0.20906	0.90418	1.31196	0.127831	0.711169	-0.453251	0.409646
DAAM2	-0.121749	1.20371	0.708487	0.935807	-0.728608	-1.07802	2.44211	0.126471	2.732	3.38875	2.43698	-0.369089	-1.1443	3.22212	-2.06128	-2.73739	2.38154	-0.285376	-1.49915	0.533165	0.423696	1.42424	0.152495	-0.48477	-1.12102	-0.013809
TGM2	6.85934	6.95971	5.76087	5.83179	6.40093	4.34466	5.8627	7.15715	7.26302	8.24685	5.6993	8.47091	4.16401	7.40443	2.78648	0.320022	5.37252	4.73311	3.1869	5.0485	5.25382	5.07459	4.17293	5.98952	7.40448	4.00855
RHOJ	0.625027	1.03966	3.0474	1.24989	-0.285741	-1.14119	3.99504	-0.319091	3.05209	3.83477	3.45043	1.94644	-2.91548	2.8552	1.15583	0.116312	2.00864	1.63222	-0.600623	0.371949	2.02738	0.963851	1.24741	0.336512	-2.22774	0.142505
DZIP1	1.80457	0.114594	1.85312	0.416137	1.40194	-0.41233	4.1211	2.83649	4.88223	3.41382	3.76007	2.43418	-0.12694	3.22983	1.84431	0.645287	2.98082	2.3399	-1.42039	-0.276092	1.27976	2.24419	0.265617	0.911853	-1.85521	-1.05537
LHFPL4	-0.582272	2.02676	-1.20416	-1.49288	-2.49252	-2.27853	-3.06687	-2.97193	-1.90873	-3.2948	-2.33931	-0.343489	1.52458	0.922875	0.868829	0.292746	-0.646234	-0.633672	-3.37632	-0.191897	0.6063	-0.749815	-0.148735	-0.199148	-0.5856	-6.18582
P3H3	0.421662	0.599175	2.15382	1.0975	-0.65707	-0.920983	4.13617	-0.0497496	2.4521	2.79694	3.82581	1.79623	-0.301245	2.84763	-0.645643	-2.16847	1.89976	1.95996	-2.17388	-0.507101	2.24301	2.51451	-0.000913515	0.320207	-1.58649	-0.335743
TMEM54	7.19814	7.07639	6.81142	6.13756	6.6644	6.74184	3.49117	6.50438	4.58712	4.78982	4.24789	6.31903	7.23903	4.97323	2.00154	1.681	7.15525	4.09222	7.64951	7.27723	7.65855	5.92695	7.62116	7.33743	7.69026	6.91564
SULF1	3.13275	3.00018	4.6014	3.75734	2.0727	1.62614	5.60263	2.07121	6.3078	6.74135	4.77158	4.11564	1.33605	5.08865	1.9892	0.375979	2.7429	3.19421	0.0970849	2.73126	2.94677	4.72787	1.33338	3.02835	0.443914	1.66606
PLA2R1	0.584183	1.97879	1.06396	0.315126	1.55335	2.79587	3.2279	-0.491963	0.487291	2.01111	1.18819	1.11277	3.53793	0.224905	6.66201	5.24084	-0.734998	0.182069	0.014041	0.124024	0.558189	0.670161	-1.03625	1.48021	1.08674	-0.591323
SLC7A4	0.386645	1.56224	0.15972	-0.525617	-0.659121	-1.01814	-2.86798	-0.442007	-2.51612	-1.16759	-2.43859	-0.974824	0.477304	-0.82094	-0.941539	-2.3326	-0.146253	-6.77263	-0.151525	0.697124	1.1923	-0.560426	0.579759	-0.620525	-0.187788	-0.363934
KCNJ2	0.665083	1.7868	-0.173746	0.873112	1.84323	-0.454504	1.43267	-0.739714	2.04537	3.34413	-1.09009	0.979403	2.1403	0.711997	-1.37118	-1.12682	-1.79413	0.23255	-3.22149	1.04339	-1.81686	-1.84577	-4.38335	0.503155	-1.63888	-1.72113
PSAT1	5.09424	4.69895	4.76058	4.9691	4.67559	2.64815	2.56426	4.51496	1.24167	3.45154	2.28743	5.32252	4.43475	4.24651	3.03397	2.31544	0.30583	3.61784	0.316644	4.40609	2.39427	3.21354	0.3239	5.91098	3.32944	2.86342
CD48	3.00734	0.914733	2.49068	1.5145	1.04131	0.0417056	3.25858	0.175237	3.54116	3.92227	2.78669	1.95346	-0.801923	1.89763	0.96781	2.15357	-1.02976	5.28074	-2.48995	1.96832	1.98421	3.3441	-0.378132	1.11388	-0.0884235	1.23836
SCG5	1.86263	2.47898	3.1444	4.22618	5.1991	4.62426	-0.643976	3.55948	3.41892	3.31838	4.26496	3.46644	4.27958	5.14367	0.72306	0.599204	5.34131	2.49545	-0.426565	4.14997	2.78063	3.17567	2.61473	4.08912	2.02069	4.4156
DNM1	-0.208586	-1.4493	0.586347	-1.09417	-1.19006	-2.06694	2.65938	-2.62404	-0.0695155	1.29243	0.175071	0.266972	-4.20367	-0.194937	2.38689	1.62987	-0.26453	1.05571	-1.90113	-2.34447	0.331797	0.471739	0.305737	-1.41319	-4.22361	-2.93069
CYP4V2	2.80854	0.610596	2.4853	1.70785	1.66975	0.787374	4.17971	1.41201	4.4985	4.42588	3.27569	3.05397	-1.25685	3.07698	1.73369	2.19146	1.5628	4.97023	-1.45933	1.30746	2.37438	3.45615	0.533773	1.72587	-1.86991	0.614672
SPRY2	2.40984	4.16035	2.8561	3.2394	3.26471	4.07646	2.49888	3.16573	1.66558	3.48647	2.23852	3.8216	4.14614	2.86938	-1.09862	-3.82533	2.23479	2.8162	2.72848	3.66643	2.55617	2.50635	2.63436	3.85641	4.66246	3.43868
CHRNB1	2.68618	1.83488	1.31502	3.36757	3.24128	2.62857	-1.85596	4.039	-0.261853	2.26934	-0.6496	2.08018	3.62363	-0.0664198	0.776096	1.16485	-0.948706	1.45115	-1.5594	3.13456	0.259797	1.00176	-1.62782	3.04157	1.10942	2.16301
AIRE	0.0356239	-0.701743	-1.24674	-0.439158	1.10246	1.56465	0.194213	-1.45357	-0.541095	1.77415	1.73104	-0.0870283	0.241584	-2.91335	-4.34947	-2.75406	0.369048	-0.28686	2.00214	0.118014	0.773541	-0.297174	0.739693	0.00951917	-0.960887	1.48923
FGFR4	3.62046	4.14697	2.35616	3.39331	3.28705	3.07051	0.422233	3.41932	0.0582749	2.84503	1.4802	2.94841	3.50748	3.18304	-1.57991	-2.68062	2.38182	1.3148	2.51862	3.92471	2.42865	0.864557	2.55054	3.47838	3.2958	2.90343
IDO1	3.43759	3.58979	6.38141	2.10578	2.09502	2.3889	5.66344	3.6215	4.93021	1.89834	2.54909	3.33695	1.01551	3.87842	1.01973	0.716903	1.96408	5.64753	2.43271	6.58565	4.40755	4.09385	2.00674	1.83429	0.705403	2.6442
ITGB2	3.99921	3.00399	3.96119	3.18856	2.08202	1.78973	4.96924	4.40736	5.44347	4.94789	3.70888	3.64684	0.963541	3.98778	2.63643	1.4753	0.329709	5.29329	-1.12809	4.35773	3.07993	3.86091	-0.0755595	2.40973	1.18922	2.67319
SMTNL2	1.4819	0.402515	-0.170818	2.05971	2.5855	1.19925	0.580773	1.76916	-0.995279	1.6705	-1.49179	0.578079	2.32813	-1.61422	4.69679	4.244	0.498588	-2.17611	0.0385345	3.18359	0.328193	0.531299	0.838121	-0.440236	-1.10975	1.59247
PPP1R9A	0.104592	-0.86908	0.321328	-0.804305	-0.662234	0.163692	0.384492	0.508388	1.00562	0.398066	-0.682011	0.161707	0.292252	0.485911	1.87191	1.28525	1.18455	-0.630885	1.11861	0.801589	0.0764223	-0.000741736	1.37778	-1.14627	-6.3487	0.189338
SEC61G	5.86532	5.9174	5.78698	6.29518	6.36671	5.92796	2.85705	6.23186	1.72923	-0.207823	4.85784	5.23001	6.55325	5.60384	4.20792	5.50164	4.43435	4.94186	1.07589	3.56437	6.10811	6.02691	4.45609	6.5744	6.21102	6.15893
LRRC4B	-1.83648	-1.70183	-0.119772	-1.17067	-2.20219	0.921215	1.33059	-3.89004	0.924966	0.255658	-0.086587	0.0439044	-0.96705	1.74808	-0.795123	-2.9317	1.44624	-1.88856	-4.17683	-0.714304	-1.85291	-4.96614	-0.0779164	-1.3436	0.30044	-1.91582
BAIAP2L2	3.47915	4.32781	4.67019	4.28038	3.72664	4.73238	3.41462	3.07738	2.84717	3.84633	3.27114	2.62304	4.40194	3.19059	0.436311	-2.01372	4.79153	2.3116	6.13712	4.45142	5.21343	3.85418	5.36678	4.38258	4.88727	5.45868
LARP6	1.8435	-0.0245474	1.76493	1.9426	1.23288	-2.90899	3.34419	1.91084	1.5118	3.53745	3.46609	2.29936	0.0998876	2.51305	4.73965	4.58786	1.18171	2.98502	-1.20324	2.23162	1.63199	3.00792	0.31378	0.777072	-0.521548	-0.833773
NID2	0.648171	3.04747	2.71766	2.71236	0.492458	0.960163	6.05467	1.15347	3.02454	5.27583	5.04451	3.69478	0.603226	3.34273	4.6855	2.63714	1.8337	2.1716	-0.890425	0.79595	2.30008	3.72731	0.358633	1.56708	0.70373	1.44853
SUSD3	1.17744	-2.53585	0.120617	-1.66874	-0.191126	-3.83842	-1.04638	-2.05554	-1.54807	-2.82522	-1.51066	-1.399	-2.60858	-2.65686	-1.55628	-1.29491	-4.80976	2.27963	-3.4944	-0.823333	-1.13491	-1.35547	-2.53594	-2.01113	-4.08582	-2.65198
MECOM	3.1163	4.15327	3.91563	3.62969	2.82798	3.96506	2.45265	4.29231	2.05971	3.75249	3.26475	3.04702	3.55587	2.88057	-2.22204	-2.40247	4.08799	1.12154	4.68124	3.29638	3.58138	2.8151	4.62017	3.97348	3.6791	4.68127
ALDH8A1	-1.50305	-0.70554	1.84504	2.63339	-1.31709	0.79008	-2.69706	-1.93302	-1.07844	-2.12704	-2.01348	-1.51066	2.60893	0.0127403	-3.11451	-2.59349	-1.60524	-1.17889	-2.51583	0.65372	-0.119238	0.666484	-0.467551	2.39676	0.478423	0.982371
CD3G	2.7129	0.335792	2.02016	-0.354293	0.73397	0.126695	2.73147	-0.0134973	2.26758	0.744859	1.37368	-1.41677	-1.42977	0.214983	-1.40397	-0.496727	0.972082	5.78099	0.440421	1.7144	2.32148	3.19715	1.74785	1.09286	-1.04672	1.31452
DENND5B	2.6389	0.0847174	1.27347	-0.946599	-1.77777	-2.01648	0.0575265	-1.69783	0.500588	0.627383	0.693097	-0.721761	-1.08907	0.21867	-4.86083	-4.63355	0.366912	2.3535	1.13215	-0.778291	-0.0940022	1.20832	0.000259662	0.19594	-1.57332	-1.98904
RHOBTB1	0.0649932	-0.921521	-0.75003	-0.22718	-1.91424	0.265641	3.23448	-1.24133	3.53579	2.20351	2.72603	1.05318	-0.237452	3.12207	-0.412748	-1.19371	1.81438	0.65493	1.11002	0.899477	0.369293	0.784194	-0.322648	-0.933215	-2.54738	-0.502708
TMEM92	4.44029	5.3819	4.36793	4.8497	5.01885	3.71803	2.31883	4.33733	1.58916	4.70647	3.65065	4.94688	4.69988	3.74498	0.453502	-0.776671	4.83577	2.95501	5.48083	4.89771	5.24291	3.57624	5.04843	4.23252	4.24905	4.00138
CNTLN	-0.738245	-1.79688	-0.722775	-1.68375	-2.88943	-1.4981	1.68114	-2.33043	2.29837	0.713089	1.33173	-0.381609	-3.04009	0.97159	2.08816	1.19557	1.3215	0.144934	-2.22909	-2.44299	0.0372979	0.382258	-1.18015	-1.14161	-3.03477	-2.65147
CRISPLD2	2.76308	4.7591	4.52067	3.43196	2.61689	0.325455	7.07244	4.94339	5.5481	5.50201	5.33443	4.45312	1.53902	5.48814	6.86198	3.39045	3.77273	4.47188	0.994645	2.63539	3.46438	4.20625	2.10557	2.44294	0.829882	2.0012
TRAM1L1	1.75335	-1.36222	-0.172152	1.0998	-0.336688	-2.6838	1.60723	1.31852	1.36209	0.369048	0.183937	0.5023	1.1618	1.61816	4.20973	3.64207	1.3773	-0.509765	-1.15881	-1.51278	-0.567575	-0.145139	-1.22956	-2.5952	-0.56458	-3.02441
TRAC	5.15146	2.1336	4.05277	1.37878	2.45004	1.85004	4.66198	2.4608	4.06701	2.23771	3.98708	0.697996	1.08985	1.92489	1.77176	1.1576	2.941	7.43722	2.79251	4.01903	4.4401	4.29533	3.98619	2.90469	2.08374	2.94718
CERCAM	0.487208	1.12324	1.71237	1.00883	0.273778	-0.191872	5.86112	1.9782	3.38529	3.33493	4.91674	2.757	-0.199925	3.6495	3.02433	2.19837	2.52518	2.34301	-1.71209	0.981758	2.30199	3.06996	0.869492	1.1458	-0.930276	0.0286964
GALNT7	2.12764	3.13738	3.43025	3.88427	2.38151	3.81487	2.77688	2.82166	2.89487	3.99275	3.05482	3.8526	3.03557	2.81228	-1.90529	-3.70402	3.71641	2.49832	4.60245	3.4532	4.03026	3.22529	4.47971	3.11447	3.14377	3.51461
GSAP	3.40067	1.60137	1.36504	3.42099	3.73225	2.43748	1.49729	3.59469	0.905104	3.10407	0.426801	3.39635	2.5938	1.3054	0.346202	0.827827	-0.799174	3.47808	-3.01191	3.83442	-0.954051	0.752988	-1.18062	1.43322	0.936131	-0.26841
RTP4	3.12897	0.864636	0.356944	2.7168	3.36156	1.62882	2.51422	1.25154	2.66932	0.221432	3.83259	2.64559	1.81642	2.71105	0.871221	1.31686	-1.41529	3.74027	-1.21531	3.21961	4.23468	2.78807	-2.04785	4.13041	3.62285	1.22543
AOAH	0.699729	1.66773	2.46623	2.06347	1.1707	-0.580481	3.35984	0.831739	4.86331	5.55938	1.71039	1.99179	-0.281497	2.65783	-1.04786	-0.631645	0.193141	3.34443	-0.756177	2.32391	2.09498	3.16102	0.382756	0.0113668	-0.18957	2.01437
SELP	-0.57857	0.740556	2.22978	0.831764	-0.707383	-3.81469	2.06537	0.559081	1.62828	3.01602	0.966386	0.780352	-1.87885	2.66604	-2.77437	-3.4278	-0.589524	0.406123	-1.79373	-0.940537	0.663035	0.338065	-1.61013	0.776289	-1.64968	-0.318785
THNSL2	-2.16407	-2.98521	-2.08869	-3.00787	-1.99345	-4.60518	-1.17542	-2.14445	-0.151989	-0.879494	0.0747931	-0.931337	-5.03215	-0.980941	1.66419	1.76257	-0.555791	-1.84568	-0.753215	-2.28222	-3.04179	-3.13863	-1.04979	-2.96684	-4.31945	-3.03506
BMP2	1.63238	1.63366	1.26578	1.30893	1.73714	0.0550985	1.5982	4.67824	0.825134	3.04514	1.21961	0.712895	1.49694	0.90438	-2.58709	-3.68032	2.4141	1.62061	5.07995	1.77305	3.17434	1.85919	2.90702	1.00622	0.00325681	1.81825
SNTB1	1.65913	-0.805247	1.93287	3.12892	3.65581	3.91854	4.14165	0.947419	2.37731	1.32406	2.59964	4.24127	1.56083	2.05156	0.198243	-1.15615	1.52048	2.83837	0.462639	3.20395	0.947808	1.74195	0.651187	0.790672	-2.94638	-1.02863
CX3CR1	-1.23454	0.466309	-0.500961	-0.830108	-1.43456	0.284076	3.00546	-0.922998	1.20436	1.91342	3.88333	1.75294	-1.71084	1.15928	2.02057	0.927775	-1.12732	1.82335	-2.94217	0.791739	0.280897	1.83253	-3.31294	-0.110232	-1.27857	-1.46399
ADAMTSL1	-2.97344	-2.44	-1.23614	-3.33062	-3.92305	-3.58813	-0.360116	-6.20588	-1.74977	-2.26135	-1.68043	-3.78394	-5.40302	-1.45115	-4.83445	-5.72029	1.02144	-3.41344	-4.14174	-4.12439	-2.86668	-3.42571	-1.98137	-3.64256	-5.85792	-3.28997
CELF3	-2.88805	-2.07544	-1.71048	-0.655087	-4.34127	1.3865	-4.31787	-2.77676	-2.49428	-1.47365	-1.57381	-3.33188	2.0334	-0.213487	0.829785	0.486828	-0.914448	-2.41313	-4.21911	-3.38535	-1.41969	-3.4059	-0.304006	-0.578676	-0.701189	-3.0798
SGSM1	-2.38017	-3.38633	-1.70142	-4.39521	-4.98665	-5.75234	-2.19311	-2.96235	-4.09712	-0.743081	-2.13591	-3.98865	-1.82083	-1.05617	1.89445	0.685223	-2.52624	-4.48223	-2.18523	-3.97579	-3.04198	-4.67676	-1.95768	-3.34105	-3.10265	-2.51973
PPP1R1A	-1.53923	-2.28188	-0.635398	-1.63437	-2.47263	-4.24621	0.260544	-3.16699	0.481754	-0.418566	-1.2003	-4.79778	-0.716998	-0.125211	-0.329098	0.04603	-0.243797	-1.6829	-4.97045	-3.08602	-0.266805	0.31971	-3.34441	-2.902	-3.48008	-2.21632
RGN	-0.187622	1.46525	0.796448	-0.0422859	1.04425	-1.09912	-2.85877	-0.65353	-1.11985	-1.05121	-0.469977	0.76057	2.32111	4.05992	-0.100759	-0.431108	1.70347	-3.75732	1.10002	-1.82034	1.90935	-0.116151	1.95346	2.37628	1.99475	1.16085
IGFBP6	4.51353	3.09424	5.42132	5.13876	4.48922	2.4589	5.50686	4.21259	4.35799	7.11604	6.42581	5.33948	4.34368	4.46112	8.78484	9.5484	3.91025	6.4191	2.40325	3.46477	5.79578	7.04187	3.18292	4.93396	3.70826	3.45128
FAT4	-1.75671	-0.513551	-1.68668	-0.84943	-2.54615	-2.19352	0.263095	-1.04831	2.77864	1.01488	1.70659	-1.15659	-3.33428	1.28073	-1.50983	-1.8044	1.87992	-1.93336	-1.07577	-2.0306	-0.568191	-0.876411	-0.662232	-2.34874	-3.28415	-2.24825
PPFIA3	-1.74088	-2.72262	-2.92397	-1.06631	0.128029	-1.96746	-3.58132	-0.622234	-3.1453	-1.81262	-3.45198	0.407549	-1.35281	-1.42194	2.62904	2.29715	-2.15559	-5.08255	-0.860326	0.374255	-2.64101	-2.1091	-1.44856	-1.76587	-0.27491	-3.42014
ARSJ	0.37931	0.168424	1.20249	1.536	-1.45126	2.69144	2.00503	-0.127712	2.93534	3.61658	1.53771	1.6445	-1.45138	2.03246	-1.57949	-3.09479	2.22284	-0.0745231	2.31124	0.174215	1.97042	2.12409	2.51327	-0.445146	-2.077	-0.184367
NHS	1.18949	0.800115	0.0623704	2.29521	1.87357	2.06158	0.212905	2.95904	1.89712	0.634974	1.40801	1.56368	0.956443	2.34652	-2.22035	-3.79734	0.689254	-1.888	-0.417762	3.77193	-1.10187	-1.12457	-0.185999	-0.122322	0.573656	-0.834313
JAK3	2.82741	0.181103	1.90271	-0.403425	-0.860363	-0.792197	3.57237	-0.212813	1.87749	3.38538	1.58383	-0.399232	-2.10061	1.72353	-0.237774	-0.18719	-0.978267	4.263	-1.15291	0.997675	0.660189	1.86329	-0.4681	-0.0363927	-1.58257	-0.637863
PCDHB2	-3.06716	-0.00354472	-0.446268	-2.49634	-5.43761	-3.23475	0.499098	-4.27912	-0.757982	-0.447997	0.308477	-0.992187	0.154752	0.901294	-2.30722	-2.56876	-1.96444	-1.75162	-1.32833	-3.91986	-0.634661	-0.595435	-2.30191	0.959941	-4.9229	-2.59254
IER3	6.10222	7.23982	5.8908	7.23623	6.55479	5.90159	5.88515	7.27882	4.79929	6.59403	2.59031	5.69969	5.25769	5.06138	2.78631	2.5773	3.59084	2.94776	3.6056	6.87109	3.72096	4.13212	0.939738	5.84633	6.06644	6.71359
F2RL2	-0.295804	1.90987	1.59883	1.69569	-0.161613	-1.38643	3.55923	-2.47385	2.09018	1.97978	0.747508	1.71838	0.33562	0.601877	5.3382	4.49573	0.885129	-0.457336	-0.858031	1.27594	1.28569	-0.309696	-0.0134828	1.28233	-0.358924	0.279804
IRF4	1.67952	0.252391	1.76506	-0.308991	0.494313	-1.70364	2.10145	-0.367937	0.264921	-0.299866	0.901873	-2.32705	-1.62167	-1.69562	-2.58957	-2.90981	-1.42593	3.07893	-3.45228	0.178657	-0.278582	2.31916	-1.58714	-0.71926	-1.97675	-0.345682
MPP2	-0.36658	0.981268	-0.468863	1.14301	-0.782735	-2.825	-2.7843	0.721136	-1.21969	-2.12975	-1.12146	-1.7596	0.603502	-0.775841	-3.80919	-6.15327	0.392933	0.212843	-0.454055	1.16388	-0.662293	-2.69319	-0.719642	-0.484546	0.79693	-1.77864
SOD3	6.08292	5.53029	5.87748	4.34088	5.02346	4.31004	5.48891	6.16938	2.6884	4.44493	3.04448	6.40317	5.89407	2.33703	2.91682	1.13023	3.34636	2.62928	4.7356	7.27256	2.76768	0.896783	2.76157	4.98153	5.88124	6.07201
PLEKHB1	0.0480967	0.203176	1.05366	-0.239489	0.104122	0.588402	-1.5676	-0.912306	-1.74008	1.22229	-0.047489	-0.123602	3.04453	0.397726	4.72955	4.78547	-1.16877	-0.407429	-1.1639	1.12535	-2.04789	-0.522808	-1.49353	0.824727	-0.481819	-2.02494
TSPAN33	1.25286	1.51097	1.47277	0.360106	-0.324665	0.760757	0.293182	-2.03755	0.510172	-1.65068	1.66274	0.365401	1.78822	1.00145	0.636636	-0.391187	3.82326	0.58031	4.37751	0.641657	3.9169	1.09965	4.4925	2.2415	2.87522	2.23732
AIF1	1.45829	1.13526	2.06544	1.44642	0.877917	1.85266	4.25948	0.631607	3.51882	2.48009	3.51557	2.37595	-0.622543	2.15579	2.36193	3.87686	-0.7208	4.66406	-2.25878	1.56411	2.2316	3.43767	-1.91406	1.64766	0.452754	0.814616
AZIN2	-1.79522	-1.72203	-2.75627	-3.22883	-1.95501	-3.10673	-1.18606	-1.41725	-0.593701	-1.80663	-1.19894	-1.7182	-1.71764	-1.94311	3.4709	3.81366	-3.10811	-1.72322	-3.64154	-3.42567	-2.8188	-2.05606	-2.85667	-2.04515	-1.52504	-2.67413
IL1RN	3.73528	5.37875	5.8335	5.72621	4.72994	3.70736	6.45811	5.1783	5.61317	8.17249	4.89891	3.64695	2.96638	6.29436	3.11875	2.89061	1.43624	4.52917	1.23386	5.99343	4.71691	5.56386	1.95587	4.14902	2.16569	5.0674
PKP3	3.82361	3.49713	3.23246	3.81569	3.62205	3.25889	0.830158	5.31392	0.413247	2.315	1.25508	3.46307	3.75229	1.86179	-0.447058	-0.917453	3.78788	0.385321	4.27978	4.29454	4.16136	2.30928	4.40132	2.74578	3.78572	3.06977
PDIA2	0.991245	1.46837	3.45741	3.26798	3.94245	0.479417	-2.09833	3.50222	-0.472355	-0.878985	0.535705	2.32261	3.40404	1.69464	3.42503	4.35684	1.10038	0.551767	1.06537	3.10174	3.12707	2.82768	1.94493	2.97124	0.123507	3.75273
TM7SF2	0.519069	1.54016	2.03771	3.37986	3.15706	1.88614	0.829703	3.81406	0.98687	2.17736	0.205042	3.63538	-1.90845	0.338829	1.38517	1.2669	0.793571	0.744824	1.80471	4.44508	3.0444	1.61685	1.05137	-1.29721	-2.39748	-1.70637
SARM1	-1.57068	-1.14213	-0.783003	0.49017	0.3206	-4.40627	-1.95159	-1.00617	-1.42551	1.08834	-0.599058	0.478402	-0.32883	-0.432003	0.32023	-0.134135	-2.85098	-2.45462	-2.46512	-0.374492	-2.7144	-4.35809	-0.664117	-2.72299	-3.06789	-4.66572
MAGEH1	1.54106	0.864834	2.12957	2.09975	1.33486	-1.97422	4.14999	0.718964	3.64697	3.80494	3.81492	1.88683	-1.18666	3.4444	4.99896	4.98787	2.44142	3.78344	0.127911	0.763437	2.70848	3.58703	2.28337	1.8935	0.329273	0.988608
MMP2	4.65278	5.75276	6.21131	6.80737	5.00936	4.15371	8.49052	5.22198	5.23777	9.06058	6.65175	6.95708	3.62602	5.53923	9.3601	7.56089	3.55623	4.70272	2.54804	5.39227	5.23142	6.67342	3.2126	5.13643	3.38831	4.66115
FLT4	-0.925407	-0.985319	0.700804	-1.25255	-1.38904	-3.03909	2.44328	-1.88935	1.97954	1.54798	1.61362	0.745883	-2.39622	1.19868	1.40772	0.773659	0.99279	1.58847	-1.1701	-1.79813	1.12174	-0.8026	-0.0155798	-0.459425	-3.29223	-3.37416
RAB34	0.473309	0.254606	1.03478	0.774975	0.566367	-0.739613	3.68843	-0.386138	3.51862	2.53438	3.93285	1.67642	-0.803	2.83004	4.62427	4.5728	1.63857	2.41765	-1.38205	-0.0463265	1.86293	2.36311	0.283661	0.970994	-1.07294	0.60447
RIPK4	3.19467	3.58098	3.35184	4.34409	3.24883	3.26437	0.86999	4.26196	0.827852	2.91586	2.2895	3.52828	4.17002	2.71043	-0.598551	-1.62875	3.20047	0.267823	4.07886	3.92796	3.20486	2.12818	3.86788	3.18844	3.46362	2.78861
VIM	5.84188	5.98138	7.98759	6.59829	5.20693	4.60896	8.94377	4.88529	7.29441	8.59016	8.3195	6.96469	4.17101	7.27359	10.6515	9.97414	6.25766	7.86767	4.2129	5.21777	7.72601	7.72038	5.51064	6.13916	4.02498	5.83605
KIAA0226L	1.45312	2.0057	2.19627	-0.252135	0.229416	-0.461808	0.568606	-0.814745	-0.0230543	1.80337	1.25499	-2.74645	-2.27217	0.883808	-2.15036	-2.4651	-3.19014	2.37739	-3.33717	-0.780312	-0.635708	0.448013	-2.1182	1.79091	-1.43571	0.788761
PLAU	3.00506	5.84205	5.138	5.28956	5.16405	3.01431	3.96102	4.55165	3.58316	6.90822	4.01201	3.28691	4.05819	4.79956	1.34633	0.72125	1.52201	3.68796	0.132616	4.25263	2.53097	4.66592	1.32544	3.63099	2.91765	5.80411
ESM1	3.40843	3.67873	2.23134	2.55835	2.30733	0.96192	2.98831	4.61507	0.522096	3.70818	5.53075	5.28168	1.96483	0.927267	2.86553	2.42349	0.472425	3.40731	-0.0188649	2.33206	1.73229	3.07186	-0.0106299	3.2738	1.73266	2.71848
PLXNC1	0.443012	0.887424	1.42537	0.895814	-0.542099	0.697133	3.1274	0.368746	2.57209	3.25439	2.77378	2.77796	-1.7862	1.37576	0.805094	0.454376	-2.22968	2.64754	-3.20409	1.36653	0.202248	2.39293	-2.3288	-0.148279	-1.11563	0.383209
CDK18	1.42478	2.48263	1.61959	2.5142	1.77807	2.39961	0.690417	2.4447	1.4903	2.62696	0.49681	2.42077	2.08136	1.19269	-4.821	-3.75416	1.98724	1.44249	2.54858	2.35399	2.06808	0.604214	2.51343	1.46587	1.44738	1.6621
ENTPD2	4.1098	4.49695	2.91819	3.16986	3.43692	2.75119	1.9797	4.22182	0.984524	1.82894	0.438229	3.89942	4.18012	1.14909	6.04731	4.66582	2.12564	-1.4285	3.15075	4.18594	3.18333	1.76829	2.7787	3.52912	3.83314	3.8951
ISG20	3.67395	3.28212	4.13191	5.40437	4.4646	1.25431	2.27531	4.01173	3.90576	4.51962	3.28031	3.02653	4.42134	4.60033	-0.805124	0.47577	1.45041	4.13037	4.07867	4.24546	5.65829	5.26903	2.06387	4.30229	4.61403	5.90544
ALDH1L2	-0.607109	-0.0101838	1.65246	0.473465	-1.20984	-1.00671	3.92933	-1.39087	3.18732	2.69467	3.1168	1.19851	-2.19709	2.7495	0.235457	0.0161682	1.10907	0.35531	-1.5643	-0.385447	1.17707	1.48351	-1.84493	-0.493504	-1.14526	-0.595156
C1orf106	0.367885	2.3848	2.06039	2.39092	1.50766	1.60955	-0.102052	2.43633	0.22179	1.52772	0.587759	0.922053	0.998188	0.253275	-1.68506	-3.52218	1.66805	-1.65975	2.9308	2.66883	1.50867	-0.493353	2.41161	0.888414	1.49575	1.73741
ANXA6	4.47661	3.25096	4.44961	2.72677	2.48853	1.67812	6.17799	1.2389	6.59522	5.12634	5.58515	3.81118	0.982152	5.92703	6.09448	4.78715	5.27027	5.88399	1.6051	2.56467	4.93381	4.32731	3.35238	2.92305	1.76547	2.5277
ZBTB47	1.1598	1.50398	2.2646	1.14143	0.645167	1.48015	4.36701	1.27815	5.57558	3.57262	4.83671	2.09585	0.28558	4.71471	1.71086	0.27459	4.14889	2.1688	2.01422	1.36577	2.72443	2.46347	2.29603	1.405	-0.689234	0.208317
PRRG2	4.75003	4.84071	3.76662	4.0808	4.39373	3.91735	1.90985	4.79674	2.28258	2.67274	2.32918	4.29524	5.1139	3.47065	-0.378376	-0.197241	5.09228	2.8335	5.63909	4.69945	5.64206	3.70514	5.59188	5.19166	5	3.34542
MMP23B	2.17791	0.795925	3.33322	1.42867	1.1366	0.802094	5.75639	-0.644377	3.49535	3.56902	4.92738	3.26997	0.0365104	3.71627	4.58958	3.95213	2.32651	3.30851	0.479386	0.0554178	3.17689	3.40077	0.932205	2.13224	-0.0120098	0.696012
SLA	1.6039	-0.173889	2.30026	-0.718457	-1.83902	-0.492044	3.38882	-1.03231	2.25762	3.38641	2.37647	0.598251	-1.39477	0.781746	-0.0968398	-2.05244	0.144764	3.82498	-1.18732	1.24055	0.631002	1.62709	0.906821	0.118227	-1.55424	1.15726
CD36	0.388432	1.90796	1.86748	1.45255	0.0691797	1.92534	7.87961	0.416872	3.60649	3.74672	4.23149	3.05494	-0.214984	2.47638	2.81553	2.56594	3.59315	4.28125	2.34412	1.21156	3.16832	2.47321	1.77783	1.87984	0.544921	0.304978
CRTAM	-1.84971	-4.02778	-0.579215	-4.12964	-3.69637	-3.53175	0.231015	-4.46643	-0.656783	-1.70616	-3.85066	-5.23905	-5.197	-3.74983	-4.97586	-5.33749	-2.43205	0.992319	-4.05854	-2.77917	-2.05953	-2.41541	-1.65418	-3.30352	-5.06943	-2.16309
L3HYPDH	-1.55163	-2.43771	-0.260356	-0.0479513	1.75729	0.640473	2.38708	-0.490738	2.36807	0.594701	1.0451	2.09302	-1.86398	1.05031	2.01637	1.82882	0.954159	0.600222	-1.94573	1.83753	-0.589694	-0.578172	-1.80718	-2.41921	-2.7635	-2.64443
PTPRC	5.24072	2.27557	4.20874	2.45578	1.53154	1.84884	4.83685	1.5182	4.24935	4.8499	3.88324	2.42619	-0.120021	2.89121	2.15804	2.09815	1.98758	6.9359	0.536461	3.07136	3.1004	3.88926	2.79111	2.33821	-0.280326	2.64712
DCBLD1	1.80724	2.23079	2.90954	2.54169	1.27744	3.01427	2.28739	0.148427	0.969425	4.28369	3.26175	2.7415	2.67912	1.79791	-0.80818	-4.14254	3.11517	1.48069	3.86928	2.00364	2.87468	2.6489	3.99473	3.8467	2.15657	0.900374
IL10	0.93352	1.49017	1.69876	3.92066	-0.211971	1.28004	3.6456	0.92203	1.6505	2.81964	1.5378	0.540791	-1.18417	1.07454	0.868347	1.87036	-1.99936	3.15358	-3.20931	1.35877	0.528881	3.07492	-2.33179	1.35635	0.0970444	0.727738
CYYR1	-0.0503441	-0.797553	1.22827	-0.742649	-3.09075	-1.17723	3.42606	-1.95623	1.95424	2.51813	2.39882	0.773777	-2.00111	2.67534	-0.763837	-1.41105	2.01415	0.968813	0.231862	-1.02131	0.504325	0.743618	0.347031	0.551541	-2.13369	-1.29667
ANO1	-0.75541	-0.0314196	0.798026	2.50186	1.77595	-0.919629	-0.21083	0.684756	0.98735	2.65423	3.23509	1.19613	0.590022	2.18426	-2.16768	-5.6375	1.27274	-0.812982	-1.26451	1.68241	0.72534	0.432564	0.554088	0.475479	-0.185822	0.684621
PTGIR	-1.27266	0.31385	1.34844	-0.751749	-1.51777	-5.39427	2.62191	-0.105493	0.881586	2.05248	-0.214126	-1.63491	-1.47351	0.80953	-2.27604	-2.97375	0.907668	-1.65891	-2.41755	-0.513557	-0.261673	0.171104	-2.89762	-0.66683	-1.89167	-0.858096
RGL3	-1.2938	-0.273554	-4.39809	-0.531323	0.49819	-1.0674	-0.342446	0.00670734	-2.49023	-1.16172	-3.00199	-1.14295	-1.60017	-1.91981	-2.90351	-3.30322	-3.47996	-4.98445	-2.18519	0.524515	-3.53104	-2.26517	-4.78706	-2.54327	-1.00605	-0.0888438
TNFSF9	0.583644	2.41249	1.87609	1.43806	0.258495	-1.40623	3.70067	0.437206	1.10539	3.42531	1.08322	0.666675	1.0804	0.558806	-0.375493	-1.09695	-1.29714	1.72487	-3.51302	0.256214	-0.63403	1.75331	-2.2846	1.39821	-1.69702	1.39684
C1QTNF6	1.4424	2.48194	2.19374	1.68788	0.167448	3.88258	5.50957	0.828989	2.64853	4.35957	6.62447	4.04945	0.895814	2.95228	4.20036	2.57743	1.15084	3.80267	0.0334265	1.34481	3.26355	3.9121	-0.512623	2.63594	1.82214	1.34154
E2F2	1.41625	1.67818	0.763633	1.86374	0.904789	-1.44823	-0.148502	2.42853	-2.12102	1.37705	1.11487	0.574751	1.49533	-0.70875	-2.54045	-2.87179	1.73111	-0.557142	2.37609	2.58509	1.91494	0.806761	1.97315	0.221951	1.82519	-0.0461388
EFHD1	1.91535	0.935988	1.64405	0.951879	2.16286	-3.49317	3.32629	5.29521	1.42675	-0.0167586	0.874317	3.28703	2.30802	3.4651	0.438676	-0.475986	1.2612	-0.231635	-0.0756614	1.45385	0.982327	1.05592	1.14235	1.56696	-0.101125	-0.316735
NES	0.231039	1.08993	1.22844	0.130891	-1.18238	-0.511701	2.75725	-1.60113	3.76159	2.77255	3.86719	1.97164	-0.69637	3.626	1.58181	0.0540983	3.9636	-0.203112	0.414136	-0.139169	1.68217	1.19394	0.61454	0.231936	-0.409863	-0.671782
IFIT2	-0.408227	-3.31674	-2.66363	-1.70846	-1.53861	-2.53427	2.77782	-1.31315	2.0442	0.447251	1.69352	0.257916	-1.33799	0.648502	0.93882	-0.493595	-1.31907	1.45959	1.51471	-0.0338457	0.945608	-0.534487	-2.91481	-1.76889	-1.94295	-3.66395
SAMD4A	0.209665	0.877807	1.80927	0.623876	0.0934114	1.48729	2.81828	-0.384518	4.99928	2.88092	4.16711	1.99053	0.332244	4.30887	2.63809	2.31413	2.79208	0.620183	-1.69791	0.475012	0.537932	1.4199	-0.0498362	1.51389	0.60862	2.02199
CXCR4	5.73727	3.40662	5.07961	5.73198	3.74619	3.89441	5.33819	3.29659	4.89701	5.6221	4.85513	4.75566	4.71933	3.73809	6.57178	6.25295	1.40358	6.98212	-0.674102	4.01194	3.83315	4.66913	1.61427	4.16932	2.91486	3.72056
THBS1	3.77192	6.75673	7.95706	5.29809	4.36802	4.38856	7.99204	3.89102	7.76826	7.73572	5.5031	6.45102	3.97736	7.12506	3.46128	1.82047	5.99174	3.65187	4.59083	3.97051	5.73736	6.13762	3.34258	5.15838	3.19663	6.87229
SOX13	2.96223	3.80924	3.4626	3.57445	3.01601	3.70337	2.44882	4.4873	0.925863	3.69226	2.72622	3.82696	3.3125	3.31071	-2.36287	-2.85426	2.79518	1.62833	3.4719	4.13885	2.73959	1.33167	3.36955	2.36806	3.33046	2.46004
ZFP30	0.459977	-4.04341	-1.61792	-2.32631	0.357023	0.395545	0.484798	0.278889	1.01881	0.0153263	0.674542	-0.221855	-4.26898	1.01568	0.521493	-0.557238	0.862931	1.78838	-0.135344	0.618643	-1.06531	-0.933502	0.361735	-2.64258	-4.52705	-1.51049
HPDL	3.10909	3.89827	3.94085	3.10166	3.65582	3.14262	1.34807	2.69299	1.88767	3.39454	3.17572	3.15017	3.90911	2.3739	-1.45945	-2.82506	3.53941	0.897783	4.07169	3.81068	3.95147	2.53539	4.18345	3.40279	3.6694	4.47579
RUNX3	3.30128	2.00811	4.15763	2.57612	0.747585	1.21952	3.9424	3.02391	1.79036	3.56344	3.60994	2.54839	-0.581808	1.1922	0.205993	-0.499455	0.312723	4.32436	0.512399	3.04171	1.76265	3.14635	0.911653	1.08313	-1.2318	1.69961
HMGA1	7.34285	8.60082	7.8677	7.72982	6.97799	6.06771	5.10518	7.28289	4.99391	7.91831	6.89973	7.8432	8.21896	6.46458	2.97859	1.55447	6.52988	5.89484	6.88912	7.52902	7.35909	6.78779	7.00184	7.13508	8.73149	7.8834
HLX	0.928776	0.999004	1.28018	0.770863	-1.96907	0.363407	3.36496	-0.530045	4.11627	3.65791	3.12955	1.7259	-0.150164	3.55291	4.27095	2.66765	4.11843	2.56295	0.0494356	1.68754	1.66968	1.55655	0.893789	0.548506	-0.231715	0.303693
GPR171	1.27963	1.47105	5.06619	1.87156	2.00817	0.266121	3.35631	0.856356	1.39892	1.37891	0.609651	-1.27936	0.5534	0.18645	-0.70427	-0.476053	1.40077	5.15758	-1.50074	2.98397	1.564	3.21324	1.39926	1.44848	-1.04239	1.42938
SGIP1	-1.40316	-2.12999	-0.77419	-1.15292	-3.05883	-2.85612	0.700307	-4.52101	0.0582195	1.20482	0.126854	-1.07047	-3.69233	0.645665	-3.70095	-4.52993	-0.952199	-0.360342	-4.38421	-2.0568	-3.29543	-0.911316	-1.8773	-2.38842	-3.55739	-2.70679
SPATA6L	-3.14094	-2.0287	-3.68442	-3.55596	-1.65431	-1.70166	-1.32449	-3.76076	0.0919367	-1.65468	-1.13981	-1.98037	-1.46708	0.225386	1.55175	2.69843	-0.198624	-1.85355	-2.72361	-2.98059	-2.48942	-0.866216	-2.69442	0.622818	-1.36891	-2.84528
STAB1	0.213142	0.92464	1.37138	0.842351	-1.56213	0.550822	5.11947	-0.488965	2.72234	2.51737	2.4404	2.40879	-2.9103	1.9848	0.68758	0.353741	0.348334	1.6895	-1.53017	0.191828	-0.117994	1.29263	-0.387951	0.26756	-2.60229	-0.943833
TMC8	1.59582	1.72287	1.104	-0.134792	0.563685	-1.96931	1.36682	-1.7147	0.630172	1.53999	1.31958	-0.827364	-1.146	0.00993474	2.65339	1.81948	-2.14213	2.82079	-2.67316	0.354903	-1.28351	-0.649566	-2.3793	-0.13301	-1.41532	0.18873
AMN	0.869319	0.583163	1.23372	0.660819	1.52973	1.23552	0.0201715	-2.43718	-1.20744	-1.67743	-1.36168	-0.317572	0.522196	1.16577	-2.7256	-2.15331	3.01013	-0.654293	3.21414	0.289457	2.69423	-0.817623	3.33633	0.392515	1.26791	2.56046
FGR	1.60955	0.395677	1.90601	0.626804	-1.02503	-0.34574	3.49575	-1.48667	2.97793	3.75309	2.92776	2.12418	-1.13925	1.91599	1.86834	1.4757	-1.15965	3.95791	-0.600604	1.20887	0.932696	1.95326	-1.08156	-0.261021	-2.1392	0.555659
SERPINB5	4.92552	4.87565	5.51538	6.09417	5.32601	5.23057	1.14957	5.66133	1.27062	4.6976	1.93531	4.9817	5.30957	3.76348	5.69179	5.01668	3.49645	1.13494	4.22533	5.66992	5.21484	4.64482	4.28659	5.2127	4.69146	6.01726
CD40LG	0.493309	-2.16252	-0.502141	-3.48278	-2.93463	-2.74513	-0.0940038	-3.2476	-1.97067	-3.34029	-1.45676	-3.67629	-4.58314	-3.10509	-4.98792	-3.82693	-1.55079	2.42714	-1.62062	-1.27721	-0.342642	-0.24614	-1.60491	-1.52265	-2.86881	-1.11251
BHLHB9	1.97607	1.9052	1.72055	-0.847635	-1.5883	2.62386	2.4146	-3.79264	2.63024	2.35089	1.92894	-0.182983	1.83801	1.89303	-1.4471	-1.56958	2.40051	3.02434	2.5983	1.85496	2.15874	1.71195	2.76253	0.771607	1.76733	1.72126
RERG	1.05052	2.10875	0.964487	0.173294	-0.492367	0.265929	3.7965	-0.467216	5.2649	2.46856	4.47551	-1.51842	-0.559407	2.06882	3.82286	4.23512	2.29033	2.0628	-0.322633	0.579296	2.24383	0.918363	1.21243	2.73663	0.466476	1.30276
ADAM19	2.20718	2.25765	2.28515	1.73458	-0.438466	0.454418	4.4134	-0.434385	4.5085	4.22841	4.09364	2.91264	0.00798482	4.08435	0.884254	-0.145941	3.5175	3.21851	2.24748	1.85493	2.09849	1.98229	1.28611	1.14086	-0.0622187	1.25381
CORO1A	7.23342	2.92621	5.73577	3.44812	2.91358	2.68276	5.34828	1.96666	4.89988	5.13392	4.76988	3.08393	2.11219	4.09355	3.0685	2.72125	2.39303	8.16018	1.55676	3.75267	4.75214	5.19807	2.62125	3.69075	1.95651	3.72166
DSC2	3.63441	3.19035	2.8821	4.49683	4.04741	2.45288	2.74999	4.90527	2.69082	3.20272	0.770136	4.14702	3.55123	3.11159	-1.04737	-1.89505	3.61837	2.72781	6.2106	4.16464	5.1776	3.60195	4.31812	4.13138	3.21781	4.02678
PLXDC1	1.45974	0.142413	3.41666	0.453091	0.295852	-0.145082	2.57832	-1.95239	1.81604	1.65029	2.64878	2.06017	1.81942	1.97698	5.85439	5.69942	1.70791	2.65485	0.701638	1.05814	3.02866	2.86226	2.4037	2.65261	-0.189437	-0.702712
SMPD3	2.02143	3.631	3.30126	2.86066	1.91766	2.83113	0.681161	3.45107	0.58601	3.59075	1.62262	3.42959	2.05403	2.87937	0.684971	-1.58295	2.82885	-0.993856	4.03445	4.40643	2.865	1.06731	3.32672	2.27435	2.21933	2.2606
SELPLG	1.24204	1.06048	2.33545	1.3497	0.802797	0.306321	3.75964	0.599965	3.04502	3.48269	2.90068	2.00141	-0.548491	2.55117	1.81715	1.29129	-0.422826	4.48888	-2.98219	1.84398	2.36707	2.55988	-1.97527	0.538161	-0.535436	1.76248
WISP2	6.9028	7.19274	5.78458	6.07303	6.4724	6.01939	4.97515	3.5027	5.24629	3.64122	5.42418	6.15396	5.92299	4.65396	2.28461	2.90553	7.98117	4.07733	8.32972	6.39187	8.37234	6.1189	8.48973	6.69911	6.96086	8.21498
CHRM4	-0.21708	-0.904716	1.21318	0.497178	0.13209	1.28534	-1.02984	-2.35521	-1.09871	3.56675	2.81759	-1.96984	1.12488	1.63167	2.23997	0.638037	-1.55689	0.210115	-2.10283	0.396203	-0.139598	-0.808053	-0.312266	0.572754	1.37545	-2.67416
NDRG2	1.48565	1.51954	2.42856	-0.00937328	1.8623	3.2411	2.90494	-1.71817	4.59934	1.68908	2.27171	3.31988	-0.168017	3.51644	1.26438	0.419819	4.71533	0.418222	4.65279	1.81781	3.61111	1.85984	4.35877	0.969477	2.27616	2.25867
CGN	4.2513	4.4076	4.41027	3.86153	4.36173	4.82528	2.17061	4.99583	2.60192	4.16017	4.22624	5.17936	4.35413	3.62811	-0.324085	-0.44782	5.11712	2.0221	6.56943	4.80264	5.28469	3.9351	5.89244	4.2226	4.47364	3.98604
SYNE1	-0.260931	-2.17545	-0.501645	-2.35456	-3.52161	-3.43931	0.517064	-3.63748	1.10299	0.0034871	0.975058	-0.857014	-3.49127	0.567399	0.0140839	-0.272092	0.478175	1.15357	-2.48233	-2.40244	-1.59955	-0.470109	-0.843205	-2.05406	-3.59574	-3.17621
IL1RAP	1.60567	1.94361	2.05541	3.28888	3.55081	2.50035	4.65687	3.03167	3.72033	5.02388	1.85613	3.16637	-0.167962	3.08178	0.304196	0.164104	0.604385	1.67036	-2.02456	3.53679	0.415705	2.54623	-0.841707	1.48759	-0.457486	2.59679
ZNF512B	-1.59704	-2.1474	-0.256573	0.325628	-1.01458	0.44401	2.15225	0.110443	1.81261	1.431	1.85297	1.40865	-3.03362	1.60531	2.98973	2.34061	0.736354	1.14757	-1.8279	-0.551139	-1.19682	-0.378492	-0.816909	-1.86329	-2.92568	-1.89239
HNMT	1.03922	1.56654	2.20822	1.96594	1.50134	2.29881	5.22408	-0.180526	4.42402	4.24635	4.69766	3.90077	0.51435	3.09494	4.79236	5.59207	1.0117	4.79045	1.01333	2.55238	3.38325	5.12405	1.31557	2.57379	0.77044	0.496667
LCP1	6.29495	3.98913	5.74417	3.89012	2.93043	2.92405	6.19672	3.16538	5.82939	6.98893	5.12603	4.5808	1.83467	5.21662	3.862	3.08128	2.10671	7.38534	1.01336	4.30004	4.75371	5.48402	2.51002	3.32173	1.8651	4.36553
B3GNT9	-0.827431	0.524726	1.7248	0.818801	-2.43607	-0.17432	4.52667	-0.262774	2.10411	3.33155	3.95718	1.75235	-0.328085	1.71026	3.65282	2.48472	0.604157	1.72605	-0.334991	0.0107226	1.97453	2.47563	1.2466	0.119728	-1.8137	0.498067
PKIB	3.60236	-0.424724	2.65504	0.209241	-0.0317278	1.44151	2.22791	-0.991763	0.58984	2.18277	2.70057	-0.0715774	5.90433	4.26492	1.30403	1.3315	1.28971	3.90852	2.80492	-0.339862	3.6079	4.41929	1.61889	1.3346	1.76452	0.161436
COL4A1	5.11269	6.72258	5.5627	5.84814	4.25711	4.23971	7.6834	4.48086	7.119	8.25146	8.49941	7.984	3.74007	7.60591	5.06558	2.4171	5.47054	4.69511	2.73891	4.58431	5.53184	6.06273	3.66908	4.48491	4.14625	4.97905
MEGF6	2.05819	1.30463	3.19185	0.90502	0.22694	0.863716	3.43124	-2.30995	0.737479	1.77745	0.945398	3.12258	-0.132393	0.53833	4.35065	2.69413	0.238102	1.40687	-3.26235	1.35751	1.87885	2.45071	0.321351	1.39337	-0.0444566	-0.471435
ABTB2	1.35459	3.15955	1.97966	0.722868	0.173051	2.14345	0.710755	-0.283768	0.790255	1.37056	1.79627	1.0356	2.15509	0.857599	-1.74439	-5.42375	2.58795	1.11153	3.64602	0.663162	1.92125	0.761558	3.03405	1.20704	1.8971	1.15463
KLHL6	3.34005	-1.42447	1.09269	-0.423517	0.0680654	-1.58455	1.3864	-0.823716	0.296863	0.950536	1.07613	-0.160502	-2.26074	-0.135234	-1.40679	-1.42248	-2.22388	3.23233	-3.58819	-0.256285	-0.361465	0.689568	-3.2227	-0.458945	-2.15314	-2.17861
TMC4	4.61465	5.35248	4.94175	4.98708	4.69822	5.61433	2.43029	5.58027	2.51592	4.49124	3.06864	6.15627	5.16012	3.5044	0.817181	0.489769	5.29425	2.16281	5.96881	5.76305	5.74639	3.81262	5.872	4.42561	4.94115	4.19713
WNT4	3.01763	3.68061	3.46766	3.35427	2.00472	2.44084	3.63519	4.5911	1.35467	1.08376	1.14065	1.10524	3.75925	2.43985	-0.781697	-1.84827	2.97786	0.0844997	2.19413	3.21892	3.38361	2.9014	3.61612	2.83157	3.97061	4.15759
PTRF	3.58435	3.91853	4.69442	4.18979	3.5811	2.31359	7.14357	4.46652	7.28298	5.8044	6.62751	4.58361	3.03746	6.74275	7.44444	6.32701	6.32487	4.28908	1.98054	2.75089	5.50357	4.98834	4.03605	3.5533	2.33576	3.17914
PALLD	2.51626	3.78621	4.08509	3.1797	2.17175	3.49477	5.93353	3.86051	7.96469	5.50266	6.93461	4.67401	3.09343	6.88378	3.96509	2.8222	6.59894	3.36759	3.50757	2.94615	4.27256	4.43984	3.84678	2.73153	2.951	2.92153
BDKRB2	0.671447	3.12865	2.91953	2.12856	0.776643	0.720243	1.61568	0.872703	1.92041	3.57889	0.314639	0.677008	0.652482	1.42782	-3.00753	-3.5451	1.22955	-1.87385	-0.688776	1.98439	1.17702	1.39717	-0.0929509	0.438772	-0.275851	2.00724
RARB	0.0559453	-0.786281	-0.279842	-2.07606	-3.75367	0.187768	1.1866	-1.37339	0.936824	1.93262	0.432297	-0.28732	-0.863438	0.959295	2.55173	1.9922	1.36254	1.27242	1.71705	-1.82587	1.33956	0.665111	1.46097	-1.2657	0.0841051	-4.32522
PMP22	4.42352	6.12199	5.27978	4.16261	4.1975	3.1759	6.00418	3.79475	5.18177	5.66096	5.50899	5.40434	5.84374	4.62932	10.1006	9.04231	6.23015	3.70421	8.58836	3.81626	7.55022	5.68721	6.50163	4.18322	3.54149	5.25349
PTPN14	-0.703873	-1.20685	-0.6014	0.0158258	-0.328915	-0.897167	1.28203	1.00999	2.60537	1.48814	1.07274	1.56949	-2.19537	1.61112	0.999798	0.451003	1.31476	-0.643615	-1.36043	-1.67011	-0.903155	-0.761541	-1.2571	-1.44902	-4.6601	-2.19299
TCHH	-1.53292	-1.67869	-1.20208	-1.63402	-1.16018	-1.67107	-5.52058	1.13034	-3.77842	-2.63443	-1.40472	2.43976	-1.17624	-3.28943	-2.56157	-3.38122	-3.29284	-3.45631	-2.53697	-0.966889	-4.35084	-4.04536	-2.0179	-3.45427	-1.69149	-2.31951
C1QC	4.87476	5.97765	6.13705	4.51496	3.8455	4.85927	8.64099	4.46248	6.68615	4.56198	7.16454	6.80644	3.3834	6.2495	6.04315	5.66248	2.81591	6.77173	0.778629	5.56981	5.42341	6.58243	1.84856	5.19006	3.96883	4.51498
ARHGAP29	1.92322	1.26882	2.0762	2.59514	2.38293	0.212905	4.61098	3.74794	4.69365	4.10406	4.04405	4.10811	-0.330962	3.98607	5.32065	4.42915	3.06046	2.44455	0.915047	2.38751	2.17345	2.16658	1.3753	1.95081	-0.620108	0.405851
EVC2	0.95816	0.466747	1.39981	1.97962	2.10609	1.85904	2.55688	2.9781	2.30983	2.49649	2.12483	1.01066	1.7176	2.27324	4.3259	3.13961	1.14805	-0.180227	-3.09549	2.20675	0.651435	1.33763	-1.06304	-0.182506	-3.10645	1.48827
CCL4	1.95059	5.0486	4.84057	5.54764	2.89303	4.017	4.01782	3.53196	4.99616	6.39046	2.42681	0.803682	1.92841	4.71748	0.176221	1.79236	3.09322	4.30859	1.42917	4.20185	4.93807	5.914	3.67822	3.55925	1.57407	4.94571
FADS3	3.15739	3.15228	3.5001	3.83717	3.08171	-0.319449	5.63523	4.08216	5.54296	5.5728	4.88713	3.86578	2.19651	4.98209	6.76803	6.13574	4.26896	3.99303	0.352329	2.81308	3.96901	3.68146	1.69136	3.2686	2.06225	2.08099
UBE2E2	1.08849	-1.22919	0.613145	0.124421	0.16052	-0.116106	2.82508	-2.56578	2.87944	2.28869	2.56634	0.788861	-3.29364	1.9228	2.68982	2.19549	1.75285	2.04052	-0.249351	1.14538	0.715129	1.82939	-0.915057	1.26358	-2.17526	0.277973
MAMLD1	-0.709278	-0.372259	0.406482	-0.324997	-1.21337	-4.10448	2.12512	0.181243	1.56881	1.46218	0.417855	-1.74962	-2.01889	0.763802	1.85548	1.40829	1.5177	-0.794532	0.936342	-2.2365	0.227877	-0.860758	1.5596	-2.4281	-3.02125	-1.26553
FHL3	1.55928	1.79675	2.51775	2.10192	1.1515	0.888219	5.00988	0.566016	5.60527	4.73468	4.38172	3.15941	1.36811	4.49096	5.41531	4.23678	3.69942	3.21989	0.241108	1.8469	3.26317	2.81976	1.50308	1.50524	-0.0676727	1.2428
LDOC1	3.93534	-0.116259	4.45545	4.51831	4.54801	4.87987	4.77967	4.93168	4.70083	4.53105	5.06395	5.45943	4.01326	4.5612	4.46143	3.44309	4.51947	2.18316	4.4344	5.93356	4.44126	2.65496	4.05839	0.889489	1.74519	-1.08993
CYTIP	2.79496	1.86475	3.31282	1.93123	0.791531	1.31142	3.94171	0.904681	2.23598	4.18637	3.00889	1.09382	1.43987	3.06539	-1.83039	-1.48533	0.290271	4.72425	-0.451992	1.96201	1.73107	3.78694	1.11748	1.81069	-0.617069	2.71957
IGSF9	3.07912	3.73468	4.80118	4.04387	2.94476	4.0222	0.841257	5.03745	1.63038	3.76954	1.25828	2.79292	4.06512	4.85223	1.05029	0.911952	4.77987	1.40527	6.90696	5.01576	5.34157	3.27308	5.6154	2.70132	2.98388	3.51952
FSCN1	3.25176	3.47416	4.53113	3.60478	2.85864	1.30189	6.16826	3.45685	3.64632	6.5725	5.45664	3.78422	2.16515	3.55158	7.43674	5.50376	2.49498	4.92176	1.25582	3.21023	4.08631	3.80039	1.45966	2.22631	1.08206	2.34018
UST	1.30997	-0.129467	0.932243	0.411177	0.872277	-2.77847	2.58216	-0.676851	2.63253	1.59619	2.38189	0.0628125	-2.18233	2.43741	1.31191	-0.0117261	1.75844	2.04755	-2.26473	1.05127	0.61256	2.04342	-0.714292	0.191247	-2.17822	0.500241
PADI2	1.90286	1.46782	2.07232	3.32602	3.74665	1.04192	1.84887	6.12629	2.32803	3.30917	2.60245	2.57354	1.07698	2.22284	0.436674	-0.0291846	-0.919741	0.694345	-1.62642	3.0222	-0.14005	0.461288	-0.742272	0.276771	1.83556	2.06501
RLTPR	2.19793	0.81027	1.55616	2.2011	1.59766	1.03706	1.72243	2.18329	0.351583	-1.42265	0.239251	-0.844683	-0.00717502	-0.801833	2.26758	2.12166	-1.14616	4.20771	-0.647056	3.98	-2.24302	0.202336	-0.62263	0.0680929	0.123481	-0.0615019
MMP11	3.36643	4.49354	3.26349	5.62814	4.58059	2.91125	3.02907	3.8617	1.41112	6.28428	3.95165	6.41596	4.42643	3.65345	2.12687	1.5978	1.29289	1.285	0.481919	3.95581	3.0447	5.43711	0.185055	4.66174	3.88275	2.96917
CD93	1.23715	3.27457	3.6463	3.09026	0.940077	1.32195	6.35048	0.665129	4.3492	5.76768	4.49883	3.61175	-0.320783	4.69027	1.93218	0.0648139	3.03477	2.51047	1.89127	2.07465	3.56567	2.74644	1.60952	2.20048	0.771142	2.10799
MYCN	0.743808	0.945578	-0.87769	-0.582337	-0.609405	0.489379	-0.578377	-0.376952	-1.15807	1.70024	0.903061	-0.299745	0.881571	-0.557361	-2.94518	-1.93538	2.75365	0.136821	1.81667	-2.55418	1.43751	-0.420839	3.4427	-0.998201	1.97706	-1.0197
GLIS3	-0.200485	0.505037	-0.418969	0.624887	-0.235977	-1.29478	0.754417	2.49276	1.3954	2.36119	0.331763	-0.845896	-0.901556	1.3283	-3.01607	-4.19246	-0.733738	-1.57405	-4.65279	0.39904	-1.15426	-0.64782	-2.12872	-0.279919	-0.981964	-1.68019
EPB41L4A	0.347892	0.629921	-0.463082	1.91428	1.54271	2.94615	-0.0950019	2.15169	0.625953	-0.751295	-1.38571	2.13414	1.28651	0.426952	1.27509	0.943261	0.656826	-2.22535	-1.98988	1.83473	1.08934	-1.30784	1.23119	1.63878	1.69901	-4.16414
POU2F2	3.21041	0.630368	2.16601	0.341519	-0.304441	-1.15404	1.70801	-0.236554	-0.0306251	-0.239273	0.163808	-0.408196	-0.752775	-0.0215305	-2.82805	-1.54674	-2.53806	3.82855	-1.70399	1.17561	0.287791	1.62148	-1.92884	0.405796	0.985697	-1.03634
LOXL2	3.58466	4.38779	2.7529	5.02101	4.94463	2.05244	5.44676	6.31432	3.79891	5.79013	6.29575	5.57227	3.65445	4.85262	3.14867	0.817582	3.08698	2.15282	1.10167	4.77299	3.80252	4.983	1.16885	2.25063	1.93279	2.69398
GPR157	3.32902	2.00127	2.01059	2.74983	2.77393	1.64227	2.62284	4.42786	-2.26825	2.71159	2.9772	3.26153	1.34088	0.998354	1.38438	0.792047	-1.75643	2.91369	1.193	3.72503	0.35861	0.989924	-1.49596	2.05421	0.809587	2.93345
PRAM1	-0.209795	-0.688527	1.34481	1.0535	-1.52971	1.36226	1.78468	-1.89586	3.00552	2.32918	1.29175	-1.36495	-2.60092	2.04233	-0.0874406	0.993551	-1.34661	1.98912	-2.11543	0.796614	-2.82627	-0.325299	-2.64856	0.185499	-1.19041	1.07698
RBP1	2.45352	3.10273	4.96863	3.5303	4.52084	2.56474	6.28727	4.88652	5.0606	5.48667	4.37661	4.18619	2.397	5.45219	7.70511	7.15563	4.22034	5.60973	3.6196	2.60759	5.76222	6.16243	3.16505	4.13225	0.304254	1.63221
SLC22A4	-1.56921	-2.64311	-2.29502	-5.75339	-5.68269	-2.16909	0.844337	-3.21148	0.61306	-0.552516	-2.87532	-1.41713	-1.63807	-1.70077	-1.5358	-2.11704	-1.29767	-0.46262	0.786111	-3.55252	-0.485366	-1.54762	-0.979985	-3.12239	-4.19931	-2.31094
SERTAD4	1.12127	-0.71487	0.313072	1.61972	-0.118824	1.31913	-0.559722	0.8981	2.76443	1.91902	3.20271	1.45012	-1.83807	2.36707	0.628064	-0.341365	1.71464	0.030322	-3.04945	1.98759	0.576445	1.62938	-1.51543	0.2949	-3.06623	-1.63037
CD37	5.57482	2.31456	4.15835	2.24093	1.34481	1.62332	5.58314	1.41229	4.30684	3.95042	4.68476	3.00369	1.15309	2.78095	3.18152	2.4917	1.44331	6.90584	0.518636	2.98136	3.66369	3.69491	1.74129	2.65954	-0.10995	2.04012
TIE1	-0.118721	-0.318355	1.28814	-0.221985	-1.60486	-1.129	2.6327	-1.47925	1.77188	2.74149	3.69497	1.18845	-2.01829	2.32447	-0.557754	-3.02418	1.761	1.07838	-0.121375	-0.573688	0.991376	0.721486	0.655617	-0.00812211	-2.3181	-0.800161
ZNF470	-0.77067	-3.11866	-1.07599	-2.65714	-1.06204	1.06781	0.123905	1.39501	0.625308	-1.16774	0.472675	-1.57076	-4.94886	0.844811	1.44046	1.28734	-0.0718715	1.20684	-1.41622	-2.65986	-1.70977	-1.95816	-0.17652	-2.04032	-3.21899	-1.3921
MAP3K15	-1.34392	-1.88943	-1.07626	-1.55083	-1.01897	-3.75818	0.339901	-4.25243	-0.609469	-0.0182014	0.215082	-1.01603	-0.422843	-1.28643	-3.41032	-4.00885	1.5995	-0.932292	1.95793	-2.2441	0.97209	-0.493165	1.88379	-0.757896	-2.39317	-2.83182
SCARA5	1.25029	0.679685	3.36803	1.54429	1.03238	-0.260437	5.45525	2.05514	1.81756	0.861955	0.0245466	2.50104	-1.17873	0.670097	1.66552	-0.6678	1.30234	2.06912	-1.58711	1.92374	2.71521	2.53857	2.25228	2.18112	-1.13242	-0.00488602
SEMA7A	4.36346	3.58844	4.81579	5.04619	3.51035	1.51769	4.13815	5.294	3.57271	6.07167	3.38023	3.73571	2.25352	4.67887	1.90098	0.413594	1.59997	4.58805	-0.412458	4.98205	2.77528	3.34378	0.670677	3.33841	1.24442	2.90036
P2RY14	-1.10612	-1.37467	1.08705	-0.195381	-2.87285	-0.0964449	1.77498	-1.44396	3.18451	2.26106	2.73205	0.805325	-2.56368	0.87703	-1.60868	-1.72233	-0.118339	1.62504	-0.551376	0.712613	1.45254	1.65614	-0.35808	0.1547	-2.40565	-1.32072
FRMD4A	0.10916	-0.334444	0.601773	-0.593135	-1.15881	-1.18453	3.5028	0.400035	2.74838	2.61596	1.98616	1.31974	-1.40416	1.65804	1.20566	0.109722	0.939287	1.33657	-3.48122	0.464198	-0.131443	0.776744	-1.89154	-0.912513	-2.87674	-1.13574
MYBL2	5.24095	5.57558	4.6804	5.10448	4.58814	3.20694	2.92586	5.32584	1.78092	4.1599	3.9775	4.10407	4.9194	3.79047	1.53526	0.295676	3.1122	3.30365	3.52756	5.26471	4.58756	3.57977	3.69901	4.10917	5.31905	4.99611
BDH2	-0.581378	0.540315	1.46384	0.675419	-0.782211	1.45584	2.01893	-2.83195	1.45986	2.39189	2.18966	1.05721	1.64071	2.35692	4.33014	4.7766	2.70371	2.40441	3.24088	0.899485	2.54048	1.78932	3.35393	1.98004	-1.87758	0.971707
ALOX5AP	-0.506912	0.178887	0.581602	1.12471	0.200416	0.539898	3.32285	-0.0345179	1.66973	2.6823	3.23931	2.8147	-0.219406	1.86047	1.53726	2.19648	-0.698251	3.20961	-2.87479	1.34053	1.24823	3.35373	-2.44912	0.717579	-1.09574	1.06643
RHOQ	2.60995	2.49896	2.79608	2.94736	3.12917	2.32805	5.57427	3.38109	6.48464	5.07712	4.95164	3.65763	2.2397	5.47544	6.42506	5.67596	4.42948	3.68942	0.317756	3.39996	2.51242	3.29102	1.94484	2.59594	1.59845	2.11492
GIMAP2	0.567146	-2.00422	0.539948	-1.49426	-2.99153	-2.68077	1.72943	-2.02506	0.954896	1.23627	0.47151	0.548289	-3.57387	-0.423869	-1.09697	-0.860455	-1.02725	3.61193	-2.42622	-1.14345	0.194642	1.02337	-0.713545	-0.932094	-2.27892	-1.28177
OLFML3	1.44862	1.83148	2.76292	2.06784	0.876849	1.25043	6.17012	0.829184	3.5338	3.76869	5.09241	3.89489	-0.555339	3.23214	4.96199	3.2378	2.90796	4.11464	0.634863	1.36335	3.33175	3.68823	2.11291	1.63954	0.54494	0.770296
SLC2A10	-0.830783	0.815321	-0.211069	0.36964	1.66754	1.25009	2.52769	-2.56661	1.27511	1.14816	2.07366	0.63251	-0.858387	0.852998	3.96285	3.37912	0.155179	0.104431	-2.19501	2.8458	-0.469612	0.49823	-2.0217	0.751772	-2.09341	-1.18077
ATF3	3.44381	3.54216	3.76765	6.71001	3.88164	5.50801	4.59161	2.65156	3.08209	2.58859	1.50368	2.37956	4.18011	2.41539	-0.108494	0.444519	3.82562	2.42723	6.57027	4.7634	3.89785	3.82076	2.6203	6.31737	2.31874	5.1829
BHLHE41	0.84091	-0.044836	1.45841	0.27379	-0.887257	0.326503	2.59575	-0.39191	2.00318	1.92368	3.6024	2.04842	-4.06894	1.56732	2.34552	-0.328993	1.08642	2.27819	-1.20295	-0.313945	-0.0105906	1.86283	0.695139	-0.604007	-0.649489	-0.0405473
IFNE	-1.83814	-4.24481	-2.68083	-1.94395	-2.92223	0.334374	-6.1457	-4.76236	-1.66859	-3.5903	-3.0943	-2.923	-2.982	-2.31457	-5.42486	-5.1453	-2.30061	-1.94574	-0.827231	-0.830442	-3.7306	-1.7612	-1.88743	-1.32261	-1.89572	-3.78321
MFSD4	0.0943712	0.136467	0.460082	1.0096	0.681791	0.589016	-1.02823	-0.53016	0.123891	0.629072	-2.34045	0.9993	0.274411	0.380519	-4.73824	-5.57598	0.454102	-0.461853	0.562093	1.25375	0.77639	-0.532305	1.05308	-0.609431	-0.731637	-2.35497
CDC42BPA	1.60896	2.00324	2.00431	2.16643	0.861685	0.424449	4.07618	2.15888	5.5892	4.03722	3.89188	2.63204	-0.469558	4.30745	4.60035	3.25387	4.17736	2.17285	1.91849	2.29333	2.51022	1.92422	3.70652	0.604261	-1.19012	0.736085
VASH2	0.893184	2.04938	2.29718	2.17257	0.707843	-0.203374	4.06766	0.620042	3.30991	4.40446	4.04459	2.28891	1.68157	1.88664	0.370878	-0.807937	0.089349	3.01734	-1.6584	1.52672	1.58115	2.23457	-2.02078	0.823489	-0.291191	-0.109578
CLMN	3.42594	3.21389	3.2323	3.08621	2.58411	4.24722	1.44214	1.42817	1.54537	2.6185	0.656689	3.85901	3.12342	1.31833	-0.332566	-1.80963	3.39975	1.32307	4.85307	4.09194	4.38761	2.69696	4.28499	2.93583	2.98212	2.76991
NR1I3	0.187806	1.4473	-0.0480109	0.45729	0.847708	-1.53779	-0.959902	-0.0655756	-1.85517	-0.544984	-1.30059	-1.08464	0.271258	0.369137	-4.5982	-3.92564	0.797793	-0.856557	2.25308	-0.37799	1.95979	-0.274718	0.804756	1.57736	0.889847	-0.288805
2018-09-06	4.71302	2.39946	3.88021	2.41145	2.04265	1.2142	3.61609	2.15472	4.93563	4.43263	3.24579	2.93529	1.55416	3.98442	0.274172	-1.49887	4.18747	5.63993	1.02875	2.94625	2.93195	3.08377	2.09254	1.47764	-0.0753589	1.79176
ADAMTS17	-0.760304	0.047678	-0.114641	-1.91545	-1.82822	0.276032	0.211037	-0.682242	0.0024361	0.770051	3.32111	1.16058	-0.644064	1.26827	-3.42035	-4.75631	-0.75031	-3.08187	-0.197666	-0.168369	0.430167	1.46873	-0.543305	-0.305225	-1.12514	-1.69143
DAB2	2.1402	2.40045	3.22911	2.57668	1.17987	2.06337	7.19521	1.4811	5.04497	4.74779	5.13814	4.63475	-0.00992518	3.88504	5.20236	3.5346	2.68608	4.24117	1.52152	2.41175	3.36121	4.00701	1.78364	2.45316	0.94563	0.268458
TNS2	2.03516	2.60838	2.66634	2.45785	1.28855	1.8279	5.61366	1.70573	6.39957	5.14912	5.13452	3.42694	1.3417	5.01233	4.80321	4.69461	5.02707	3.23546	2.05232	2.41964	2.87281	2.48672	2.48573	2.36619	1.30973	0.765323
ROBO1	2.86661	1.02577	0.980098	1.88988	2.73412	0.220293	2.04355	3.47915	3.72767	2.98225	3.24625	1.44328	2.34697	3.43503	0.715111	-0.301056	2.40474	0.488381	-2.16774	2.51528	0.628792	1.83413	-0.667419	0.371682	-1.28568	-0.896772
FKBP1B	1.45964	2.24612	1.40429	1.00397	2.42747	-1.86777	1.58659	2.12694	0.481857	1.70638	1.92951	1.66474	2.93141	2.51279	-2.27951	-2.15902	0.493699	-0.452294	-0.958749	-0.948338	-1.94144	0.714751	-0.655676	2.05433	0.993964	-2.70634
FAM78A	3.46578	0.0579424	2.07608	1.15975	1.22313	-1.2126	2.87077	-0.295928	1.23033	1.76236	1.85125	1.01575	0.748427	-0.235292	-0.0908536	-0.951105	-0.451163	4.74589	-1.4024	2.07706	-0.146803	1.75593	0.125307	0.213117	-1.55327	-2.35899
BZRAP1	0.0372838	-1.45982	-0.544431	-0.977003	-1.04424	-2.36848	0.820886	1.83434	2.2296	0.775303	0.850983	-0.577184	-2.78734	1.25592	-2.38975	-3.99799	0.203978	1.96737	-2.35151	0.109735	-1.89512	-2.12481	-1.38894	-1.38672	-1.76573	-1.3262
CCDC167	1.8238	2.39515	1.25533	1.12378	2.54055	0.251689	1.15825	0.983845	0.842464	-1.10179	2.71547	0.817214	2.20466	2.48486	5.60894	7.65843	2.32437	2.82317	1.43875	0.808904	2.98049	2.86441	3.2114	2.77749	3.04268	2.64363
TEK	-0.871773	-1.00927	1.26796	-0.114865	-2.20061	-1.29512	3.61264	-2.10186	2.21302	2.92427	2.74154	1.57701	-0.959694	2.70016	0.948623	0.802152	1.30824	1.99312	0.427467	-0.774256	1.46154	1.21083	0.361589	0.918524	-1.96028	-1.97491
ETV7	1.44653	1.53748	1.6188	2.04245	1.35824	1.57881	1.4282	1.35447	1.39301	2.2284	2.19008	1.87491	1.41065	1.25689	-3.34116	-3.46269	2.13943	2.15205	3.43106	2.63198	3.16228	1.4518	3.01447	1.01083	2.68217	1.44009
FST	-0.583993	-1.5324	1.1298	-1.50376	-1.73795	-3.43763	2.40739	-5.08528	-0.510502	0.515349	0.175045	-1.34562	-2.56701	0.131221	-2.22014	-1.86296	0.409223	-1.05344	-0.302214	-1.59698	-0.855883	0.18494	-0.331777	-1.19408	-4.74332	-1.56903
GFI1	-0.00878094	-0.758885	-0.0612114	-1.66773	-1.98021	0.130483	1.2847	-1.66845	-0.00905095	-1.93391	-0.982357	-1.46646	0.934675	-1.99982	-5.33638	-4.23568	-0.0388449	2.02299	0.924244	0.270206	-0.814146	-0.748762	0.930207	-0.0152138	0.0601027	0.232747
MLXIPL	2.94249	3.97921	3.5335	3.13829	2.35472	4.56197	2.47538	1.59477	1.93834	1.28114	3.98761	3.42565	3.39695	1.91493	-0.600737	-0.702985	4.38803	0.76517	5.46233	2.91801	4.43576	3.28853	5.23488	3.74519	4.56798	4.90048
ZSCAN22	1.32934	-1.27342	-0.0984916	0.638602	-1.48833	0.531229	2.21316	1.82156	1.71213	1.67485	2.016	1.34364	-4.67377	1.76692	2.38709	2.32021	0.432917	2.53623	1.29222	1.53081	-0.184579	-0.26126	0.0440863	0.0120823	0.135088	-2.81757
KANK2	1.05401	0.436919	1.2316	1.04021	0.286077	0.576861	4.31654	1.6447	4.61712	3.78727	4.18326	2.47577	0.222384	3.93363	4.89276	3.89782	3.36495	1.86537	0.48726	1.31291	1.84595	2.53046	1.14929	1.05167	-0.4273	-0.0192581
CAMK1D	1.43924	0.268063	1.47657	0.536391	-0.799802	-2.66842	2.38325	2.48202	0.256999	2.58747	2.64876	1.7368	-1.14422	0.45771	0.809966	-0.820853	-1.64281	2.8212	-1.94276	0.76807	0.133195	2.18773	-1.13626	-1.43222	-2.77828	-0.235547
COL4A2	3.71097	5.92027	5.12933	5.08353	3.5286	3.31976	6.96612	4.02809	6.55966	7.51972	7.61283	6.88849	2.75542	6.98742	4.34519	1.95246	5.27108	3.88958	2.43869	3.92724	5.0442	5.50821	3.34466	3.9044	3.23575	4.10976
MGAT5B	0.941437	-1.26482	-1.40042	-1.08492	0.69157	-3.96912	0.228406	1.25201	-1.82009	-1.4288	0.646716	-0.865477	-0.558047	-0.631486	1.05084	0.237392	-1.726	-1.73195	-2.29288	0.579933	-2.45104	-2.05995	-3.68567	-1.05754	-5.20783	-3.85724
PRKX	5.45942	5.92688	5.17776	6.15373	6.37076	5.68308	4.22743	6.94854	3.33143	6.61588	4.30463	5.13061	5.65259	3.62028	1.56847	0.535167	4.46785	4.05035	5.41522	7.16457	4.36573	3.95157	5.1648	4.28021	4.66847	4.04085
SLC7A11	0.463874	1.82144	0.838581	2.2924	2.02943	1.39793	-0.499612	2.37171	0.0213802	3.24238	-2.20009	2.16597	0.469573	1.08654	-1.86178	-2.72978	-1.031	2.2671	-0.4805	2.4617	-0.65087	0.624073	-1.95046	-0.308625	-0.648444	1.01755
LSR	6.28152	6.06372	5.77778	5.96031	5.98838	5.4208	2.89594	6.50468	2.46875	4.915	4.17366	5.45394	6.70015	4.65428	1.5252	1.25575	4.48268	3.00058	5.21043	6.34668	5.54096	4.64587	4.96232	5.81524	6.3613	5.23975
RHBDL3	1.26576	1.32539	-0.0452185	2.03455	2.56655	-2.5906	0.365569	3.244	0.941595	1.00929	-0.379783	0.569141	0.0392367	0.604299	-0.414557	-0.668593	-2.00915	-2.92344	-1.01218	2.62669	-3.48931	-1.15335	-0.279396	0.12405	1.44311	-0.868492
DCLK2	0.575554	0.989539	-0.262199	-0.693264	-1.47993	-1.23805	2.478	-0.0480602	1.74156	2.97655	1.94637	-0.598206	0.804929	1.77994	2.85933	2.72382	1.2857	1.74031	-3.19134	-1.69618	-0.894274	-0.244459	-1.51036	-0.505441	-0.731798	-1.09391
CD24	3.49352	4.40168	4.6783	4.79015	2.97759	5.60486	1.77934	3.34082	2.61656	5.20539	4.00302	2.77446	5.39537	4.03894	0.0434145	2.28863	1.16756	1.44659	1.31047	5.21239	2.13483	2.82101	0.934517	5.98236	4.17957	4.82341
FAH	2.96957	5.83018	3.45345	4.74635	4.94256	3.89496	3.41625	3.68242	3.2129	2.62749	0.454976	3.65284	5.18852	4.49679	2.76901	2.1191	4.75007	2.40787	5.47319	4.96948	0.287248	-0.514427	5.06513	1.33643	5.21765	4.52683
NCALD	1.45528	1.29538	1.58538	0.550408	0.186817	2.49855	2.73725	-0.834797	3.8571	2.32678	2.95302	1.91171	1.839	3.46276	-1.97796	-2.49582	3.06498	3.02777	1.38382	-0.39783	2.36481	2.32329	1.88303	1.18377	0.273122	0.0174089
PTCHD2	0.0167245	-1.98491	0.738984	-1.00697	-1.45579	1.39256	2.1046	-0.946305	1.33779	0.926136	0.617787	2.09478	-2.53978	-0.940963	1.49181	1.57309	0.240668	1.32255	-1.76633	-0.416292	-1.96589	-1.53625	-1.64574	-2.08585	-3.43469	-3.32429
NGEF	1.92575	2.70321	1.75704	2.20671	1.13011	2.12313	1.22499	1.42928	-0.114251	2.33516	1.07215	0.944071	2.85384	2.26152	-2.31612	-3.73033	2.38871	0.712622	3.29562	1.37272	2.50525	1.28285	2.98305	2.3842	2.76475	2.5038
BTBD11	-0.544713	-1.194	-0.70084	-2.45298	-2.5825	-2.27325	0.780428	-2.42113	0.221407	-0.317522	-0.702954	-2.36458	-6.00613	-0.234968	-4.8421	-4.30904	-0.313726	0.431227	-2.7828	-0.946591	-1.45662	-0.43497	-1.52236	-1.53262	-3.55771	-1.20159
CCR5	0.383762	-0.021696	1.30781	-0.394434	-1.30865	-0.644866	3.58738	-0.706698	3.23767	3.33317	1.78856	0.570599	-2.36589	1.32327	1.98683	1.53453	0.126682	3.40571	-1.06449	1.78479	0.775674	2.46605	0.225657	-0.593152	-2.22393	0.441282
SRGN	5.81655	4.62844	5.93653	5.61503	4.83156	3.36892	7.50351	5.76449	7.05319	7.78921	5.72895	4.65699	3.47931	6.90345	4.59143	5.27292	2.44727	7.92155	2.07904	5.59739	4.92357	6.52003	2.33066	5.11609	3.52746	6.25584
FNDC5	-2.56258	-1.76205	-2.47842	-3.18534	-1.78489	-5.48403	0.381239	-3.53686	-2.73091	-3.51386	0.0585105	0.0196308	-0.592597	-2.24104	1.20466	0.709017	-2.77813	-1.24135	-4.38445	-0.50608	-3.74911	-1.84569	-2.37589	-1.61393	-4.18842	-3.36606
ANTXR2	2.96779	2.91802	3.96972	3.72489	2.0098	3.52815	5.88279	3.48988	7.2298	5.84456	4.94174	4.35298	0.352239	5.92454	4.64071	3.90857	5.04584	4.23704	3.92792	2.50607	4.00286	4.22517	4.25435	2.91329	0.254461	4.66769
OCA2	-2.87674	-1.66121	-0.469723	-2.52916	-2.15622	-2.49745	0.886433	-3.74624	-0.331747	-2.34262	-1.27964	-4.11877	-3.21522	-1.16511	-2.89083	-4.11739	1.13528	-1.40603	-0.384587	-2.3096	-0.125294	-2.80842	-0.137345	-2.83007	-1.00488	0.863788
RAMP1	4.24982	3.86446	3.92584	3.88133	5.38349	5.42794	2.41428	4.15299	3.15077	4.24024	1.62124	4.1007	3.9008	4.4179	-0.668579	-0.769032	4.42033	0.931146	2.87946	5.01806	3.78526	3.31193	3.62987	5.08349	1.81611	5.47358
DOK7	0.973817	-1.2195	-1.30185	2.22005	2.19889	2.15587	-0.985962	3.48761	0.798075	-0.000519464	-1.26217	0.93558	1.90106	-0.55251	-1.17148	-2.27769	0.762842	-2.77096	-0.411809	2.09206	-0.0685575	-0.461768	-0.999259	-0.727879	-2.57704	-0.415936
ZAP70	1.9327	-0.70357	1.88789	-1.62479	-0.397872	-0.639366	2.76206	-0.858136	1.46822	0.441335	0.0876529	-2.80514	-2.27115	-0.636459	-2.76949	-1.83904	0.513703	4.28876	0.566835	0.828965	0.772055	0.460921	1.11752	0.400013	-1.03813	0.715226
C1R	4.7592	4.02582	6.48265	4.40584	3.11968	2.15686	7.36663	3.01754	6.38525	6.54194	6.62248	4.91464	2.13315	6.0777	6.16112	4.93167	4.18183	6.46696	2.35828	3.58289	6.18338	6.79648	4.16507	4.35913	1.83985	2.95867
EGR2	1.61607	1.91308	2.05929	2.21735	1.27863	1.45264	4.00366	-0.781611	1.18218	3.43107	2.31185	2.24001	0.394163	1.28226	0.873325	-0.441147	-0.957437	3.06551	1.04523	0.851895	0.808542	2.45418	-3.89593	2.17682	-0.260015	1.4555
ST6GALNAC2	4.71968	5.91196	5.5261	4.25736	5.4572	5.01941	2.86636	6.07396	3.50786	4.51375	4.25767	6.08712	5.4034	3.23532	0.808064	-0.847191	4.35819	3.91074	4.10549	5.76198	4.55652	3.36632	4.76512	5.0731	5.54677	4.78743
COL6A3	1.9332	4.19249	3.90767	3.58147	2.33151	1.24651	6.20854	1.54665	5.1928	5.60775	5.93924	6.41531	1.33079	4.97845	5.12133	3.57215	3.8616	3.44456	1.51668	2.20771	3.65982	4.79452	2.27192	1.68054	2.01046	2.11167
CD34	1.9868	3.16606	3.55288	2.67031	1.1951	0.738067	5.75653	0.980735	3.99744	5.71743	4.43097	4.14274	0.532058	4.2949	6.80347	5.39948	3.47854	4.05308	3.26735	1.92016	4.0944	3.2214	3.07257	2.4703	0.930548	1.75751
TMEM59L	1.13486	-0.563687	1.69271	-0.81541	0.747723	-1.63381	0.885606	0.801092	1.25683	2.94144	1.8642	1.5657	1.30437	2.67545	3.60421	2.02751	2.27285	0.584578	-1.94771	-1.27027	-0.00334805	0.814895	0.372016	0.402548	-2.53591	-1.74965
GRAP2	0.128966	-2.05836	0.277854	-1.42513	-2.66774	-2.32367	0.956116	-1.8368	-0.0505921	-0.0352509	-0.28835	-2.31852	-3.59238	-2.25486	-2.55522	-4.91316	-0.830544	2.888	-2.04857	0.0621908	-0.194027	-0.0613604	-0.452823	-2.01928	-2.48773	-1.04879
LCAT	1.81977	0.623165	1.67292	1.57934	1.81311	0.433707	4.0759	3.47764	3.70391	2.70183	3.63843	2.15894	0.00916082	2.68388	5.63033	5.99432	1.87166	3.50134	0.0396718	1.51702	1.10166	1.53919	-0.0360806	1.33986	-0.459725	1.06276
RASA3	1.40747	1.34782	2.3499	1.30844	0.358914	-0.451295	4.18123	-0.0845755	3.61426	4.64345	3.20447	2.01329	-1.17641	3.11789	2.00236	0.704553	1.83161	4.18656	-1.09193	0.882612	1.69973	2.465	0.757185	0.678721	-1.23561	0.221147
DAPP1	3.8565	1.65538	2.49618	1.61995	1.51045	2.05382	3.0221	-0.188684	2.45144	3.01937	3.04784	0.944986	0.957432	0.75861	0.528241	0.582778	-0.942254	4.94567	-0.675424	1.86927	1.11521	3.3917	-1.09274	2.41576	-1.22916	1.28125
EVA1B	3.0749	0.950722	2.84798	1.93069	2.66822	-2.12574	4.49955	2.00528	3.21962	4.24384	4.65526	3.0626	1.46444	1.71595	5.70962	5.40846	2.91728	4.48496	1.60843	2.17709	2.67321	2.87553	1.65537	2.21311	0.488402	1.2786
AFAP1L1	-1.4584	-1.43604	-0.505679	-1.63974	-4.40524	-2.74251	1.79942	-2.56731	0.420897	1.59303	1.14746	-0.744279	-2.85191	1.00141	-0.100436	-1.25309	0.431922	0.190096	-2.74587	-2.20787	-0.137337	-0.7533	-0.836553	-1.19152	-3.10408	-3.40856
CYP26B1	-0.659324	0.191537	-0.724488	0.107246	-1.49164	-4.98453	0.648254	0.219946	-3.25498	4.02076	-0.629809	-0.854646	-2.63672	0.688162	0.896287	0.0684507	-1.61303	-2.31111	-1.18385	-1.84757	-1.95012	-0.350668	-2.03779	-2.45577	-1.50634	-1.34791
ABCG2	0.986964	-0.763974	0.998701	1.32104	0.889287	-1.15542	1.86091	-3.20687	0.896148	-0.115716	2.26483	1.39198	3.22135	0.327135	-0.0636308	0.462157	3.12886	2.58116	4.59276	-0.171177	3.03378	1.99764	3.84091	1.10113	0.789654	0.198469
SPARCL1	3.92591	4.24851	5.48661	4.32938	3.80865	3.29885	6.49838	3.34798	8.01388	6.51053	7.53169	5.73498	3.59207	8.31994	6.76356	5.93131	7.31992	5.94854	3.58608	4.09193	5.46593	4.86264	4.86246	4.83391	3.09722	3.56015
CADM1	3.53537	2.46406	2.86359	4.5575	4.65005	3.10599	1.01647	4.75186	1.62033	3.68725	1.46227	3.97763	4.28576	1.92433	-0.0815985	-0.0113844	1.11413	1.83563	-0.452345	3.88767	2.05637	1.82706	0.108638	3.0805	-0.413446	0.188996
TRPV2	1.86302	0.736458	1.02858	2.36142	2.00634	-1.03209	2.9194	4.89024	2.01664	2.69385	2.49452	1.73316	-0.48783	1.70204	3.49338	2.20296	-0.0875877	2.57826	-3.00983	0.662907	0.94952	1.94368	-0.64311	0.227569	-0.307689	-0.337501
C1QB	4.10149	5.23425	5.4128	3.8141	3.43643	3.97421	8.04243	3.78361	5.73368	3.67083	6.27618	5.96027	2.52423	5.35692	5.27384	5.24645	2.2451	5.93945	0.354858	4.83833	4.7116	5.86092	1.11361	4.56311	3.38416	3.76215
MXRA5	2.67748	3.02264	3.65921	3.45969	2.082	1.26702	5.27904	2.33217	2.24807	5.30219	4.65378	4.00865	0.836449	2.10087	1.46621	0.256407	0.97966	3.09608	0.0269275	2.56421	3.34934	4.95153	1.31926	2.50645	1.71644	0.946963
PCDH18	-0.0935188	1.0826	1.22622	0.990911	-0.294813	-0.973166	3.19821	0.229379	3.16853	2.64924	3.67876	1.24846	-1.51704	1.61356	-2.07288	-2.95546	2.24573	0.623146	-0.308182	0.0158401	0.622462	0.783457	-0.079908	0.00863031	-1.01027	-0.426575
DNAJC12	1.12238	2.16476	1.84884	2.32153	1.04741	5.28892	-0.288082	-0.301725	0.856603	1.3649	0.213864	5.01352	5.0164	2.32541	3.50312	5.02081	1.32266	0.705217	1.42417	1.46624	2.6711	1.04767	1.86397	4.27202	2.73966	3.72273
FGF2	-1.31256	2.25658	2.36584	1.07672	0.744755	0.135561	2.74345	0.619563	3.20889	4.0236	2.27762	-0.615437	-1.2248	2.99885	0.206943	-1.10465	2.2394	0.250355	-1.39903	0.411209	0.470459	1.41822	-1.00035	0.169963	-1.13261	-0.779782
DACT2	1.63836	3.01866	1.21729	2.03097	1.81275	2.31002	1.41699	2.28414	-0.790794	1.83485	-2.91408	3.28376	3.75573	0.428346	1.14733	-0.0884649	1.12021	-1.30434	-0.00903933	3.02596	0.806877	-0.61279	1.65865	1.96993	1.843	0.420143
ICAM1	3.48723	3.59146	5.41231	4.73239	3.34496	2.44757	6.1163	4.19596	4.01137	6.12527	3.75079	4.10262	1.5032	3.13669	4.97773	3.82691	1.3761	4.40936	-0.394733	4.4476	3.31734	4.33386	0.520196	2.931	0.0938441	2.56775
PIK3AP1	3.68447	1.62321	2.16043	0.959867	-0.265168	1.4431	3.30143	0.977251	2.80085	3.44006	1.26827	1.41889	0.549176	1.58351	0.488895	0.0584135	-2.16989	4.39147	-0.200682	1.89756	1.09441	1.5793	-1.38564	0.806769	-0.344427	0.460019
ANTXR1	3.42442	3.58224	4.54673	4.0249	2.98681	1.34812	6.581	3.39152	5.29289	6.7928	6.84022	5.33978	1.34123	5.2091	5.64801	4.94191	3.84993	4.49095	1.75143	3.43575	3.71777	5.86135	2.92806	4.27529	1.3506	2.01509
ACTN1	4.33251	5.34035	5.35446	5.52053	4.95303	5.24555	5.96638	5.47651	8.15763	6.87652	7.06225	6.17689	5.23955	8.06541	3.37466	1.29746	7.57563	4.39145	2.43514	5.27441	5.17451	4.81213	4.08292	4.70975	4.74237	4.79673
SVIL	2.13953	3.04445	2.10378	2.9467	1.44793	1.84984	3.72996	3.34062	6.77199	3.8755	4.19075	3.67096	2.12718	5.31486	3.28618	1.90141	5.62923	2.18721	2.64322	3.93876	2.42868	1.84398	3.07023	1.76783	1.56792	0.622893
ITGA8	1.46096	0.0551818	2.45488	-0.326096	1.75324	-0.219342	4.14133	2.48583	2.32686	4.09701	2.90285	1.75251	-0.109774	3.96366	0.160714	-0.50382	2.63637	1.17335	2.20016	1.07444	3.1336	2.43226	2.70787	1.47961	-2.56607	0.196129
CD83	2.54066	0.64211	2.32704	2.55905	0.575206	0.654426	3.45228	0.360297	1.54383	1.81499	2.70308	-0.0753498	-0.392959	0.169091	1.85958	2.60857	-1.74722	4.69289	-1.35426	1.31415	0.89417	2.54772	-2.03651	1.44733	-1.23543	1.08168
MAFB	3.18565	3.1623	3.33788	2.95081	2.95916	1.58161	5.62988	6.05391	3.81579	4.93983	4.16299	4.8679	3.05722	3.68949	6.55331	5.04173	0.447103	3.46647	4.08512	3.65713	2.97754	3.73167	1.1853	1.52396	1.52189	0.745908
GABBR2	1.22325	2.36667	-1.24689	0.425749	0.633245	-3.4971	-0.746671	2.73292	-1.53376	0.0998473	-0.699766	1.6708	-0.685204	0.108036	0.366353	-1.51618	-1.29367	-4.71357	-1.76993	0.132261	-0.45798	-0.922965	-0.95855	-0.637691	0.684074	0.649367
ZNF432	0.83032	0.0437784	-1.01022	-2.48754	-0.066379	1.1858	-0.203045	-4.91801	-0.0892689	-0.444518	0.219612	-0.404042	-1.3975	1.04307	1.91788	2.21698	-0.3934	1.68021	-1.57017	-2.61122	-1.27399	-0.538067	-0.511269	0.4523	0.841957	-3.85941
PTPRM	1.79608	1.25666	1.67163	0.788017	0.0992683	-0.782883	3.9176	2.71736	3.09098	3.91246	3.35707	2.38163	-0.535371	2.94271	4.62367	3.25532	2.51406	1.90749	0.108625	-0.260028	1.17219	1.87699	0.541208	1.07859	-1.49982	0.172385
FADS1	2.42379	1.40128	2.54918	3.51967	3.603	-1.5191	3.6078	3.55949	3.72696	3.84692	2.00665	3.29834	1.02591	4.04407	1.22076	-1.03761	2.83448	2.76729	-1.03255	3.29081	3.06344	3.26726	0.670695	1.26486	-0.551012	1.56134
SHE	-0.331238	-0.162901	0.939527	-0.0386523	-1.68739	-1.18146	3.15985	-2.54673	2.02168	2.5714	2.35275	1.02333	-1.85678	2.2505	-0.149781	-1.1112	1.75125	2.03315	-0.274266	-1.14317	1.28903	0.51344	0.295935	0.642267	-2.47453	-1.27089
SSBP2	1.04023	0.119675	0.857678	-1.70172	-1.95487	1.14528	2.06917	-2.38878	3.16573	1.68824	1.61466	0.698814	1.21133	1.90606	1.79413	2.04555	3.19758	1.89964	2.85122	-0.737971	2.82186	1.79019	3.1324	-0.498358	0.0644966	-1.01821
CASP4	6.33237	6.16429	4.94235	4.32038	5.37431	2.5907	4.50063	5.90364	5.27922	4.68278	3.88958	3.27865	4.98667	4.01159	2.26813	2.65993	6.77236	5.25259	7.11287	5.09669	6.84708	4.76295	7.53123	5.12761	4.94347	4.19746
ACKR3	4.42442	5.86457	6.59869	5.26289	4.55187	1.05083	5.72186	5.86816	2.94222	6.79801	3.8495	3.22167	4.18679	4.66044	5.14652	4.39776	2.30976	3.46153	1.11086	4.42569	3.66484	5.17405	1.86419	5.71835	1.35719	2.68487
DNAJA4	1.67515	2.21565	1.66689	3.24619	3.69501	3.5542	1.86251	4.60563	4.52468	3.10523	3.43757	3.17346	3.62006	4.40873	2.14695	2.25137	5.05421	2.94958	-0.863446	3.32562	2.64278	2.38869	3.55193	1.86061	-0.658595	0.754759
COL8A2	-1.24014	0.353165	0.625691	-0.247851	-0.191233	-1.41051	3.46543	0.33458	3.85843	1.08727	0.798772	-0.0747039	0.104753	2.81093	2.60706	0.73586	2.72443	-1.32417	-2.16186	0.274136	-0.447348	1.17609	0.690998	0.330099	-1.15688	-1.28329
ARHGAP24	0.538479	-0.147737	0.641657	0.0838737	-1.22594	-1.70258	1.39033	-1.51387	2.56952	2.5681	1.34733	-0.788073	-2.06132	1.18897	-1.087	-0.94471	1.01204	2.77699	-2.4622	-0.789013	0.844884	0.895419	-1.65201	-0.684527	-3.21396	-0.758301
ARMCX5	0.452859	0.669943	0.432158	-3.6858	-4.12478	1.6136	-1.58742	-5.02195	-0.0707589	-0.0101983	1.0068	-1.80107	1.2415	0.117762	-2.14328	-2.13357	0.282357	-0.150505	-0.36549	-0.169649	0.281562	0.0958704	0.600374	0.758397	-0.04153	-1.05777
FAM84B	2.98785	3.61831	3.4642	3.88821	4.21817	3.28711	2.531	5.46535	1.59056	3.80071	2.57172	4.62802	3.89397	2.73989	-1.73567	-0.873651	3.05783	1.89369	4.1285	3.76435	2.91576	1.61402	3.70439	3.40745	3.14609	3.02525
CDH13	0.62614	2.27845	2.62102	2.81756	0.981568	1.27275	4.19992	-0.647192	3.5076	4.7971	4.1687	3.89582	-1.06417	4.07596	4.28814	2.85994	1.89219	0.816141	0.390029	1.20584	3.16373	2.81599	0.413269	1.60423	0.0540288	2.31409
FLRT3	0.108023	-0.376575	0.852758	1.0225	-0.570938	0.393998	-0.135656	-3.51314	1.05863	2.51438	0.94554	-0.519917	1.73099	1.74379	4.58331	3.72961	2.42951	0.693587	2.93566	0.00289691	2.27517	0.937826	2.7056	2.50826	-0.23226	-0.290457
IRF7	5.29389	5.06791	3.5718	4.69995	4.8135	3.88113	3.13	4.80962	4.18098	2.13882	5.07507	4.68003	5.2239	3.60329	1.3734	1.21347	2.59687	3.53761	2.67508	5.50038	6.26534	4.19192	2.52784	4.76547	5.5697	3.32253
GPR146	1.06327	-0.962702	1.44542	-1.95787	-1.56708	-2.32527	2.3953	0.473652	2.14777	1.76514	1.65859	0.824189	-2.11221	1.76549	1.25184	0.618765	0.621684	2.78635	-0.132518	0.119263	-0.414862	-1.22294	-0.652729	-1.23488	-3.00873	-2.02564
RGS10	1.55812	0.562426	1.0307	0.86313	0.707304	1.87035	3.73825	-0.509436	4.36912	3.97649	3.46362	2.74617	0.406493	2.3072	2.67491	3.97943	3.14573	5.6192	0.0697984	1.20977	2.1623	3.58858	0.251871	1.11999	0.836441	1.12312
STK39	4.79552	5.90362	4.07734	4.80073	4.68053	3.78955	3.02932	4.82519	4.8961	3.46348	3.75877	4.55843	5.52212	5.20349	-0.336757	-0.763825	4.81644	3.61167	1.92289	4.8723	2.76109	3.68634	2.34838	4.88571	3.78461	4.3384
GNB3	1.42352	-0.43353	0.798565	-1.37295	-2.35261	-1.13104	1.16329	-1.93145	1.23712	-0.325026	1.55781	-0.929666	-3.5081	0.0381833	-2.97419	-2.89322	-0.964286	1.06667	-2.13004	-0.250461	-0.677278	1.50271	-2.22561	-1.6346	-3.40466	-2.96591
PLCB4	1.47055	0.853908	2.65562	3.15236	1.91551	1.74298	0.977185	2.40295	4.19772	3.54246	2.60354	0.137582	2.4176	3.73782	-3.04847	-1.98132	2.36218	2.07393	1.15392	2.41747	2.06652	2.03694	1.18848	2.25925	1.31902	1.5267
SCARNA7	6.79103	3.25512	5.48629	3.98024	5.04554	6.91478	3.36157	4.31932	3.34337	1.80787	6.12918	4.54664	3.88448	4.56716	5.20852	6.64416	4.48351	6.88384	2.43677	2.67376	4.95821	5.57047	4.16296	5.70808	6.04685	5.5627
NYAP1	-0.952732	-2.20935	-0.511767	-1.60998	-1.21575	-2.07143	2.435	0.0179647	0.71483	0.497137	0.523763	-0.811093	-1.62347	0.444148	3.55123	2.84758	-0.971586	-0.883649	-2.46682	-1.05088	-1.04763	-1.98903	-1.99742	-1.92117	-1.07407	-3.17415
GIMAP6	3.73895	1.18401	4.22419	1.33852	0.108571	1.29194	4.64584	1.4436	3.2223	3.44946	3.01017	2.46486	-0.175297	1.49211	2.30924	1.44568	1.47838	5.80588	-0.669522	1.51123	1.80842	2.70004	1.01351	1.31163	-1.31633	1.57771
CTGF	4.50048	5.64301	5.8088	5.37782	4.96347	5.94439	8.47453	3.83443	7.76099	6.91049	8.34292	6.96633	4.34869	6.44319	6.40142	4.6677	4.93111	5.18355	2.68566	4.52401	5.84496	7.06194	2.35001	6.37027	3.14759	5.14801
ADAMTS6	-2.72473	-2.2517	-1.80411	-1.71312	-1.49314	-2.43213	1.10407	-3.75933	0.776517	0.73792	1.85826	0.534968	-3.74186	0.501108	-1.09955	-0.424992	-2.13065	-1.09131	-3.08109	-1.3121	-2.91744	0.126695	-2.91902	-1.07689	-2.69812	-4.38298
FZD2	3.34672	3.45944	2.03569	4.28309	4.20955	2.44103	5.42877	4.00861	2.56102	4.23148	5.3014	4.46083	3.94393	3.83653	5.56626	3.81854	2.24233	3.04682	-1.5248	5.13806	2.44226	4.07933	-0.427485	3.20154	2.14292	1.4808
RAB3IL1	-0.140251	-0.0334691	0.78318	0.875473	-0.496214	-1.45115	3.97557	0.086743	2.13722	2.199	2.33134	1.18808	-0.634661	2.59815	3.80295	3.02621	0.405045	1.8004	-1.59348	0.515985	0.706986	1.47247	-1.29998	-0.0265915	-2.06566	-1.44416
UNC5B	5.18577	5.27262	3.95087	3.63729	4.59959	1.53	3.77036	4.65138	2.95837	4.16585	3.08271	3.53818	4.18808	2.30741	0.169001	-0.891707	4.97547	1.89002	6.09159	4.29878	4.79459	3.1008	5.44184	3.04637	3.89522	2.89683
HAPLN3	0.494979	1.76423	0.704996	0.824735	-0.349059	-2.04901	3.00068	2.11814	2.42249	3.35747	2.79062	2.12526	-2.56659	2.28183	0.691865	-1.39936	0.441781	0.756682	-1.86749	1.34975	1.69328	1.94431	-0.682096	0.889917	-1.23968	-0.541641
ACSF2	5.6311	5.38196	5.22763	5.98335	6.44372	5.94098	3.27547	5.34679	2.61572	4.53486	3.90218	6.22242	5.15626	4.15144	1.74743	1.10811	5.39199	2.5645	5.55173	6.54815	5.94937	3.94507	5.9552	5.57876	5.3067	5.25847
THEMIS2	1.05556	-0.28622	1.3141	-0.03977	-0.963073	-1.42438	2.80811	-0.692884	2.04079	2.90092	1.11629	1.0235	-1.64232	0.785115	0.712789	0.107541	-1.94495	2.54853	-2.837	0.16279	0.217268	1.00558	-2.97893	-0.558769	-1.89108	-0.670394
MGAT3	1.72209	2.14736	-0.384036	-0.526199	-2.06677	-0.886284	2.19415	-1.26422	0.529581	2.55468	1.22469	0.82555	2.92342	2.12762	2.44613	0.713353	2.97406	0.0937359	4.65715	0.138788	2.64978	0.513784	3.68128	-1.18983	2.14613	1.66942
ZBP1	2.31658	0.85591	2.08073	2.09645	1.24864	0.409125	2.34959	0.0829069	3.00016	0.413572	2.68927	0.446193	-0.718054	1.30806	-0.846768	-1.58335	0.308128	3.32026	1.86459	2.95544	5.05421	2.92716	1.09179	0.71786	0.875505	1.29023
QKI	3.51349	2.74829	3.0585	3.60772	2.57439	2.94505	5.4117	3.10488	5.47925	5.36555	5.17214	4.31941	0.831326	4.93753	5.73155	4.91894	3.62849	4.42453	-0.0652088	3.29154	2.80455	3.60674	1.49556	2.18827	0.119024	1.81725
ADAMTS10	0.971634	-2.01968	0.697365	-1.22433	-1.81701	-1.36204	3.38881	-1.38908	2.10354	1.11972	2.3665	0.404979	-1.12138	1.77517	1.0974	0.362554	1.25231	3.14584	-0.916339	-1.0941	-0.940625	0.480658	-0.447454	-0.347432	-1.61693	-2.10464
ST5	0.105584	0.32595	0.572046	1.21414	0.196506	-0.37651	2.48489	0.632371	3.97458	3.17789	3.64399	1.60473	-0.883444	3.35482	-0.220007	-1.7384	2.40635	0.883441	-1.06399	0.681323	1.24196	1.31493	0.432233	0.0891863	-1.46924	-1.26274
NOX4	-1.22952	-1.10848	-1.9767	-0.25693	-3.47944	-2.30179	1.9699	-1.97516	-0.126499	1.96896	2.53051	1.07084	-1.45245	0.953168	2.3369	1.98448	-0.198677	0.132708	-1.68101	-1.54057	-0.209338	1.24342	-1.68064	-0.333309	-2.61831	0.341325
TNFRSF11A	0.808476	3.31799	3.35824	3.03409	-1.23861	3.83266	3.11105	1.35697	2.00283	4.80553	3.00186	1.97202	2.51234	1.41496	-0.730318	-1.95329	3.48352	2.08258	3.69691	2.03236	2.51939	2.0057	4.15031	2.71233	2.95452	1.92269
TP73	0.705359	-1.40173	-0.741539	-3.04379	-3.27711	-4.03925	-0.78899	-2.0185	-1.66094	-1.73194	-1.6318	-2.70554	-3.22242	-3.86971	-3.14358	-4.24679	-3.43714	2.11643	-5.18856	-1.17215	-1.92787	-0.596337	-2.83156	-2.76254	-3.36586	-2.42732
IGFBP7	6.94213	7.08093	8.75835	7.49569	6.99232	5.85923	10.3397	5.51163	8.82738	10.3345	10.9131	9.46006	6.50964	9.47059	9.71664	8.39343	7.81272	10.247	5.72988	6.61026	8.44427	9.49437	5.71615	8.4505	6.35553	7.08921
EGR3	0.722466	1.65788	1.44891	2.38855	0.26968	-0.10344	4.66367	-0.395948	0.222026	0.960037	-0.671644	0.813459	0.118041	0.847059	1.25259	0.269297	-1.98627	2.38336	0.202399	1.15578	-0.306596	1.12811	-3.7143	1.49425	-2.21563	1.09985
RAB11FIP1	3.19481	4.62797	3.65581	4.61546	3.4163	4.65285	2.8144	4.69077	2.45004	4.66584	2.58677	4.80283	3.50871	2.69678	-0.283597	-2.00845	3.58081	1.97553	4.7365	4.91959	3.57141	2.68048	4.4379	2.48233	2.99129	3.82183
ARHGAP30	2.74491	0.503715	2.5407	0.491443	-0.784063	-0.868474	3.08444	0.109106	2.52717	3.09256	1.88694	0.892321	-1.91586	1.89699	-0.0167192	-0.943755	-0.178304	4.06701	-1.65513	0.433397	1.14559	1.46841	-0.00276975	-0.216335	-1.55546	0.754434
CD200	1.7353	0.670006	2.18629	1.23495	0.909996	-1.16993	3.30266	0.608686	4.12349	3.71865	3.69827	1.35626	-1.83698	3.54392	1.96736	2.51654	2.46627	3.66959	-0.223113	0.283957	1.5407	3.68956	1.09163	2.03751	0.537077	0.412879
GBP6	-0.823031	-1.5608	0.569452	-0.574749	-2.78124	-1.41138	1.01208	-0.747345	3.64268	0.611937	0.960386	-0.475391	-3.7704	1.32659	0.0960054	-0.917499	-1.60687	1.89757	-3.54738	0.623623	0.446076	0.503949	-1.06854	-0.855032	-1.9235	-1.51933
ADRA2A	1.93302	0.122368	2.95691	1.15555	1.15358	0.701691	6.13702	1.95375	3.16026	4.02161	2.01934	2.03433	0.060421	3.51953	1.28611	-1.04497	1.18798	3.9912	0.354757	0.269105	2.80973	2.96895	1.26894	0.142975	-0.425178	-0.0908244
FOXL1	0.139037	1.49286	-1.64128	1.20747	0.351493	1.11666	0.590003	-2.83139	-1.40639	2.42323	0.528261	1.12984	-1.09308	-1.11532	1.33744	0.0368339	-0.844787	0.718754	1.32903	1.34296	2.04528	1.41595	0.213478	0.158324	-2.59902	0.551344
RGS6	-1.95109	-1.98314	-1.17512	-1.91384	-3.10799	-1.60779	-0.759134	-4.08886	-2.18192	-4.03182	-4.34436	-4.90812	-4.17521	-1.65343	-4.70522	-4.66212	0.935241	-4.26777	-3.24842	-1.35055	-0.776563	-2.29361	-0.960704	-1.39269	-3.46721	-1.96664
LY6E	7.14233	7.76705	6.96933	7.12192	8.71005	7.77542	5.85627	6.79694	5.69805	4.93775	5.86236	4.97198	7.61729	8.15117	4.82289	3.27509	7.88985	7.03409	5.89781	8.17297	9.18738	6.9126	8.3373	7.52525	8.06844	4.79769
BLNK	3.34244	0.583769	2.36722	1.12725	1.50385	1.32298	3.19037	0.242584	1.51966	2.51247	1.95656	1.98531	-0.527419	-0.199976	0.106523	-0.443689	-0.123517	4.10065	-2.83016	1.86938	1.73302	2.3653	-0.387825	1.20232	-1.83382	-0.206608
PSD2	-3.34954	-3.99466	-2.04379	-4.12114	-3.11601	-2.50454	-1.76566	-2.89026	-3.69387	-4.05878	-2.07716	-2.7387	-3.4873	-2.85371	1.42626	1.40698	-5.09613	-1.8785	-4.10325	-4.18479	-4.66915	-5.58692	-3.68922	-2.86402	-3.73142	-4.4143
MNX1	0.709388	1.84022	1.15015	0.25654	-0.939515	1.30347	0.163795	-0.211446	-0.0534278	2.40371	2.71728	-0.1939	2.06224	1.46835	-2.37814	-3.38921	1.97657	-0.994767	2.59977	-0.364275	2.1789	1.05079	2.54714	0.932734	1.69619	0.100574
FAM171A2	2.22206	3.82841	2.60998	2.12412	1.97497	1.96936	1.6315	2.12451	0.115113	2.23122	2.30896	2.22285	3.13246	1.18265	-0.517713	-2.97905	2.77032	-2.06888	3.02924	2.64755	2.38239	0.687043	3.22808	1.50326	2.9624	1.97751
CDH5	0.560793	2.08392	2.39709	1.69835	-0.583173	-0.262095	4.71904	-0.740179	2.45682	4.3703	3.20981	2.7408	-1.90503	3.20889	1.13599	-0.856191	1.97397	1.71768	0.984845	0.681467	2.05454	1.45648	0.708381	0.76573	-0.311787	0.708408
IRX3	1.54447	-0.0931433	-0.91818	1.60261	0.48259	-0.00300249	-0.665626	1.20426	-2.41726	-1.77912	-2.03867	2.71772	2.24442	-2.61256	1.64405	1.15094	-1.44245	-1.86715	0.219636	1.7159	-1.88909	-0.507449	-1.97546	0.147385	-1.72682	0.459033
STC1	2.32756	4.03276	2.93528	3.85581	4.0308	1.1684	2.28888	3.66451	-0.185902	4.83559	0.307254	1.84324	2.64048	0.44297	-0.278454	-0.938207	1.16396	0.411665	0.0841187	2.53334	1.10995	0.892834	-0.469831	2.08243	1.28725	2.83893
CHST11	1.91809	2.574	2.79718	2.40604	0.929783	1.24832	1.88284	2.41483	1.81865	4.61592	2.59387	2.63181	1.72321	1.89397	-2.51876	-2.68187	0.0250997	2.23193	-1.13123	1.84459	0.596973	1.75823	-0.1841	1.69788	0.74877	0.96226
HR	2.26457	2.93054	-0.120575	2.24288	1.77968	1.92241	-1.15004	3.8539	-0.109835	1.59164	0.011467	3.29815	2.42565	2.51027	2.03647	0.911646	2.34227	-2.15366	1.64865	3.53186	1.13779	-0.771232	2.50397	1.02906	3.4349	1.79974
TMEM156	1.84917	-0.739495	-0.605712	-0.609368	-1.64182	-2.30758	1.61223	-1.40245	-0.285416	1.71726	1.04255	-0.238078	-2.41948	-0.962441	-0.0208834	-0.591342	-1.73347	3.36666	-3.31902	0.00054812	-0.72032	0.911262	-3.25917	-0.073416	-1.49879	-0.273762
PHACTR1	-0.124654	0.700742	2.65236	1.50918	0.580792	-0.666528	4.27205	0.949042	2.6776	3.9335	1.10343	0.309549	-0.864302	2.90539	0.722081	0.311038	0.533005	1.17498	-2.30237	1.66635	0.208967	1.69555	-1.50983	0.59846	-1.12076	2.60798
LAPTM5	7.68114	4.50209	6.29047	4.64175	3.94942	3.864	7.64626	3.73612	6.38927	7.63436	6.33034	5.79172	3.24327	5.17801	5.42406	5.08616	3.52494	8.7838	2.35908	5.24167	5.94536	6.5022	3.98308	4.60587	3.08728	4.81194
PCDH12	-2.43101	-3.1649	-4.24723	-2.65484	-4.66288	-2.77984	0.0202426	-5.24163	-1.35547	1.06479	0.114394	-0.614642	-3.00493	-1.20187	-0.94003	-2.43864	-1.35013	-1.50647	-3.13592	-2.44481	-2.17157	-2.06316	-3.02132	-2.31798	-4.15079	-4.67218
APBB1IP	3.28922	1.20387	2.72901	1.05365	-0.12871	0.682708	3.7553	0.3896	2.42337	4.00404	2.21414	1.20371	-1.75375	1.50878	1.26445	0.566211	-0.390254	4.22098	-1.54546	1.25445	1.84308	2.5395	0.164658	0.551846	-1.47364	1.02458
SLC22A17	2.18688	0.148101	2.21742	1.3757	1.43697	-2.08399	3.52266	1.77253	3.00383	3.35838	3.76625	2.67501	-0.555034	3.28168	4.48519	2.71443	3.65433	2.12726	-0.0759412	0.315752	2.45489	2.49723	1.31769	1.02863	-0.762417	-0.0981719
TLL1	-2.17588	-2.07344	-0.670546	-0.182743	-2.44031	-3.51973	2.90628	-2.33058	-0.234632	2.11801	0.463821	-0.958278	-3.42302	1.47442	-1.49075	-3.03757	-0.682284	-0.674747	-0.970421	-2.6228	-0.8528	-1.79817	-1.18706	-1.63887	-2.9118	-3.28337
ST3GAL1	1.82688	0.455786	1.82483	2.2983	1.46684	1.23231	3.2554	1.36835	2.42104	3.92527	2.04629	3.06022	-1.35832	1.84432	-1.2464	-2.49372	0.455933	3.71379	-1.15141	2.09285	0.432981	1.29657	0.0751766	0.0514278	-1.25346	0.340528
KLHL3	3.19162	2.45121	0.829914	3.29745	3.47713	3.47411	1.20476	2.93728	1.4282	0.390965	0.345805	2.91582	1.96566	0.660062	-0.050005	0.0803166	-0.823657	2.04539	-0.506238	3.74344	-1.86582	-0.658775	-1.02268	0.60685	1.00213	-0.754402
TRAF3IP3	3.63671	-0.231647	1.77588	0.0288661	0.229096	-0.460509	2.91712	-0.606962	1.33287	1.50344	1.45722	-0.928863	-1.66366	0.280077	-0.516438	-0.0813436	-0.343846	5.47525	-0.724952	1.05615	1.29728	1.74894	0.0994299	0.90892	-1.25305	-0.0341367
ABCC3	1.55401	2.06019	2.56932	2.82976	1.88909	3.16708	1.62644	1.98247	1.66464	2.88863	1.58856	2.61643	2.29148	0.899539	-0.528527	-1.11835	4.13	1.91415	4.86663	2.45179	4.80793	2.46697	4.87722	2.01669	2.09768	2.37294
PCDHB4	-2.5021	-3.99726	-1.6407	-3.6802	-2.42594	-3.43107	-0.0585992	-5.0502	-1.48584	-0.163694	-0.0793454	-2.37177	-0.827082	0.47605	0.431409	0.579644	-1.26021	-1.80801	-1.1598	-2.16919	-0.882731	-0.980278	-2.28134	-1.77823	-0.890383	-5.22257
FAM65B	3.46201	1.81249	2.32821	1.62934	1.18234	2.25863	2.17292	0.679748	1.97638	2.53224	0.634946	1.12339	2.08074	1.96043	-1.51788	-2.12869	0.0480408	4.97215	-3.10788	1.97978	0.559952	0.835463	-0.126443	1.18554	0.433964	1.24378
ADH4	4.01676	4.11454	4.43952	3.81462	1.9365	4.59377	2.85472	1.98807	2.82268	3.07643	2.54205	3.87975	5.49932	1.06501	3.48807	4.11627	5.89247	3.63695	5.26781	1.24118	6.66853	5.18649	6.58738	4.80303	3.73878	4.87386
LRRC34	0.701496	-1.13576	-0.0820352	0.787407	0.742989	0.917119	-4.30984	0.805218	-3.45862	-1.78421	-1.62709	0.884879	0.38416	-1.22965	-0.78585	0.179103	-1.13564	-4.46265	-0.503364	1.2845	0.000187538	-0.39316	-0.0210781	0.33308	0.0255817	0.549157
SHROOM1	1.76355	1.0687	1.29393	2.58904	1.05736	3.75434	1.41628	1.57247	1.11288	1.83795	1.38709	2.58434	1.01525	2.13969	-3.06668	-3.23232	0.47126	-0.518718	1.43307	2.79075	-0.695844	-0.0564852	0.833076	1.83531	0.709405	1.81074
MDFIC	3.32855	2.11521	3.15853	2.98264	3.42916	1.11952	5.3382	1.58134	3.74933	4.43685	4.94144	3.8574	-0.454526	3.54766	5.43725	4.69619	1.96544	4.94858	0.626355	3.30784	2.59346	4.24309	1.43339	2.03756	-0.210548	1.25501
CYP39A1	-0.965863	-0.24553	1.55739	-0.0310245	0.653436	0.29867	3.36737	-2.3406	1.53509	2.20098	3.12978	1.41056	1.25314	1.92022	4.90045	4.62202	1.11482	2.40878	-0.180157	0.369316	2.43444	2.72559	1.00332	1.37113	-0.789165	0.949527
MAP7	3.64693	3.75305	2.88842	3.0704	3.73282	2.7002	0.321143	4.74291	0.922373	1.85794	0.605428	3.55051	3.70025	2.40799	0.392482	-0.416939	3.27397	0.374644	3.87932	3.89291	3.85547	2.31318	3.73904	3.24692	2.87203	2.2709
CSF2RB	2.70638	2.32031	4.22529	2.46229	0.845815	0.38606	4.53817	1.82546	3.8478	5.32016	2.71785	2.23343	-0.144393	4.17467	0.241657	0.0630059	0.79737	3.79368	0.154998	2.84313	2.38752	3.41545	0.0529723	1.65067	-0.621484	1.93124
PYDC1	2.5361	4.73143	5.62239	4.05607	3.86065	2.74061	4.52784	0.163563	4.50067	4.8932	5.5119	2.09803	4.31711	4.06345	2.93442	2.93034	4.01879	4.64281	4.62935	3.55571	6.88344	5.8215	4.5342	5.359	6.20001	6.32226
TRAF5	2.47873	-0.672756	0.574828	0.0320162	-0.61475	-0.840164	2.44965	-0.492381	3.41458	1.1833	2.46056	0.670877	-1.59041	2.12087	-0.779687	-0.0371164	1.59022	4.34129	-1.21964	0.0759844	0.501628	0.911538	0.198306	0.336021	-1.88566	-0.635398
SCAMP5	0.601744	-0.757848	-1.2077	-1.56458	-0.287395	-1.16994	2.20601	1.69498	-0.475244	-0.443699	1.6763	-0.0275705	0.366308	1.28345	3.73576	2.91125	-0.695183	0.334236	-2.7404	-0.7661	-1.74465	-2.11313	-1.38227	-0.747158	-1.22646	-1.86272
SEPP1	6.78583	4.21462	6.23392	7.02659	9.03876	8.49512	9.84248	8.3207	7.95163	7.24704	7.74291	7.79139	6.88066	7.78745	10.9627	11.6441	7.98361	7.7075	10.2308	8.65378	9.25629	8.24687	8.38163	8.2184	5.27078	6.87529
SLC9A3R1	6.08468	6.70055	5.78338	6.55673	6.31197	4.78187	4.40282	6.66299	4.17089	5.65252	4.60039	6.17446	6.47596	4.59739	3.74118	2.12467	6.47606	4.75541	8.23693	6.83395	7.85814	5.46866	7.29185	6.15807	6.05784	5.56838
TXK	-0.383443	-1.76539	-0.20566	-4.31988	-3.433	-3.25601	1.2862	-3.49201	-2.51096	-2.11497	-2.35595	-4.44353	-4.12579	-3.74169	-3.20499	-3.13879	-2.33827	2.01893	-2.52037	-2.47613	-1.65535	-1.9885	-1.38433	-2.54683	-3.1394	-2.61645
SSC5D	-0.0979558	-0.296958	0.701771	-0.667389	-1.89512	-0.726405	2.99813	-1.87957	2.57381	1.67439	2.51554	-0.041285	-3.23597	2.58655	0.314105	0.0628954	0.876503	-0.866294	-0.420327	-0.64851	0.880035	0.745539	-0.19192	-0.723134	-1.98842	-1.46974
NFATC1	2.32669	1.46082	3.0057	1.45159	-0.0794872	-0.5953	4.2705	2.59937	2.33288	4.1242	2.24195	0.769729	-2.18854	1.97181	3.58805	2.26112	1.82262	3.79375	0.513329	1.4806	1.77574	2.0006	0.739261	1.34036	-2.1654	0.900923
TNFSF10	3.2449	2.7754	4.11079	4.09399	2.92432	4.37215	7.86428	2.80452	5.91535	5.83773	5.90587	4.95568	1.96371	6.08207	7.28924	6.42564	3.034	6.13281	2.44759	5.18164	4.65081	5.18251	2.89134	4.04852	1.85498	3.44693
SLC2A5	2.89451	3.57661	1.3151	2.43225	1.95718	1.04978	3.18663	-1.12385	0.757706	2.54671	2.82769	3.29831	3.70357	0.161088	0.98911	0.333916	3.00592	0.951051	1.71275	0.608279	5.5609	2.73525	3.68631	1.48358	3.5929	3.76801
CD1D	1.73797	1.46394	3.5185	1.97714	1.70228	0.718666	4.72998	1.10033	2.64679	3.30829	2.24687	1.10484	-1.62405	2.28427	2.77606	2.05268	0.516691	4.78617	-1.92793	2.33892	2.58518	2.76551	-0.0572911	1.27998	0.253687	-0.362831
CD80	1.55246	0.791072	1.79276	2.01957	0.600165	0.461581	2.84817	0.0457365	1.70909	3.52162	1.77629	0.101852	-1.08173	0.538379	1.55102	2.79706	-1.6005	3.76694	-2.39227	1.48524	0.345112	2.94109	-1.30463	1.08904	-0.886833	0.757885
ENTPD1	1.29035	1.44201	3.15918	1.58542	0.452374	-0.331186	3.71843	-0.145934	3.45737	4.04905	4.181	1.94399	-0.566147	3.53078	1.08778	0.0969904	2.94217	3.57089	-0.367695	0.699827	2.48187	3.0917	0.766519	1.04629	-0.971137	0.837669
SPTLC3	0.857519	1.08207	1.39246	1.88622	1.61999	1.64424	-1.0153	2.15996	-0.949778	1.04568	1.6407	1.45757	2.48405	0.123653	0.266841	-1.29113	1.68461	-3.4369	2.03215	1.215	2.67158	0.861654	2.2636	1.67461	0.926865	-1.38136
PEAR1	0.607049	0.618041	1.24946	0.167345	-1.0016	-1.07891	3.72357	-1.7831	1.42381	2.5846	2.66426	1.72675	-1.91335	2.04082	3.32678	2.47708	0.805325	2.79934	-0.505953	0.314604	0.440463	1.14781	0.255851	-0.302175	-2.06236	-0.279851
PLXNB1	2.97759	3.72885	3.10638	3.6268	2.57478	3.77757	1.42311	4.00377	1.60419	3.10515	2.35676	3.54191	3.11989	2.0049	-1.74352	-1.46788	3.85665	1.97902	5.3014	4.10025	3.08879	2.12081	4.59543	2.6771	3.58004	2.31749
TMEM150C	3.82018	-0.0170404	2.5832	3.61824	3.49253	1.34497	4.11988	3.99927	2.14292	3.51583	2.09756	3.39134	-3.33852	2.84148	2.96357	2.53832	1.30431	3.40498	1.57237	4.33545	2.46747	2.16119	0.8624	1.64252	0.405785	2.34881
MMRN2	1.43778	1.52445	2.95456	1.42659	-1.2379	-0.511191	4.15763	-1.08792	2.19686	3.77315	3.15594	2.33948	-1.19186	3.38401	1.01575	-1.26497	2.74381	2.17961	1.60848	0.275019	2.67309	1.15403	1.60841	1.3673	-0.477804	0.221939
PIR	3.56746	2.88081	2.28868	3.88481	4.44461	2.75957	3.23699	2.8368	2.99785	2.36041	1.84865	1.80765	3.09163	3.20732	6.40567	7.51247	1.74723	0.720611	-0.266437	3.99164	2.36064	2.16554	1.3786	2.09833	3.87631	1.64765
VEGFB	2.53322	2.76442	3.03016	2.3813	2.02485	1.65657	5.82004	3.25965	6.25297	4.92011	5.07954	3.71666	2.40278	4.75662	6.10267	5.40707	5.96936	4.62599	2.60867	2.92639	3.46759	3.38328	2.67274	1.97438	1.36501	2.48945
LLGL2	4.95611	6.26099	5.38615	5.2564	5.35474	4.78259	3.14807	5.99357	2.73398	5.40738	3.41545	5.68316	5.31507	3.81613	0.854586	-0.194561	5.17073	2.82023	5.51291	5.8044	5.63691	3.71162	5.7265	4.75513	5.11958	4.19395
ZNF704	-0.865598	-2.47658	-1.29491	0.350305	0.36436	0.851983	2.09295	2.3545	2.33721	0.170028	1.26561	3.25464	0.541654	1.7747	0.150469	-0.631728	1.26731	-0.864415	-0.075447	1.20124	-0.12427	-0.639663	0.613117	-1.1775	-3.72721	-0.422468
CYBRD1	3.31869	5.05019	3.57994	3.3639	2.88047	2.41894	7.41608	3.9607	5.04953	5.94152	4.92624	4.69708	4.99658	4.37816	6.21567	5.30616	3.08972	4.28348	0.436204	2.77918	5.13096	4.80666	2.59358	2.37111	0.982875	1.64549
ST6GALNAC6	0.469813	0.713713	0.439272	1.07226	1.53696	-1.82117	2.95322	1.09434	3.67869	2.1547	2.6069	1.44895	-0.431514	2.91615	1.3479	0.916568	3.82173	0.824939	-0.471245	1.94383	0.923362	1.2888	0.446341	0.203088	-0.905075	-1.81282
VWF	1.36394	3.35303	3.944	2.13046	0.950603	0.408147	5.30527	0.924723	3.77589	5.33162	3.59415	3.72803	0.17314	4.86512	0.531539	-0.0809681	4.19018	2.54591	2.98758	1.76199	3.44627	2.65502	3.23607	2.50972	0.964997	1.59151
MFSD6	3.50682	4.76546	4.13164	4.6552	3.71015	4.54362	1.56073	5.02417	1.87131	4.29816	2.16342	4.86082	4.17215	3.26394	-0.490687	-1.30277	3.52756	2.08626	4.23812	4.89919	3.94757	2.86351	4.00901	3.46563	3.54442	4.60577
KLHDC8B	0.473413	0.251895	1.24986	0.50998	0.359971	0.980457	1.60289	-0.0882011	2.91883	2.27975	1.64613	1.18585	0.81013	3.82823	2.03561	1.96386	5.23953	0.161772	0.382225	0.886433	1.66032	0.574169	0.932545	0.431997	0.410754	-0.0951668
PLBD1	3.94307	2.43652	3.91364	5.03803	5.28056	5.21433	4.71239	5.09227	3.50176	5.74366	2.18867	5.68135	1.25177	3.43518	0.788051	0.99004	3.41529	4.75294	3.67402	4.86807	5.0836	3.63279	3.99858	3.4459	0.336043	3.98764
BMX	-3.61399	-4.70714	-0.376541	-1.26292	-3.58819	-3.70821	0.341143	-3.78865	-0.149471	-1.09199	-0.0988099	-1.83087	-3.21688	-0.164512	-1.78192	-1.99927	-1.14829	-2.08684	-4.51925	-4.37537	-1.22543	-1.15672	-2.72651	-1.07245	-5.41459	-2.41851
SATB2	1.75043	2.80859	2.19823	0.724546	0.454239	2.29265	0.71447	1.0128	1.60557	2.0001	-0.265568	1.43175	2.6972	0.334763	0.395118	0.298389	4.62641	0.675527	5.57367	1.64881	3.8253	1.9516	5.30823	1.68036	2.59978	1.53604
GGT7	-1.58359	-2.94055	-1.20331	-1.53224	-1.61299	-3.27819	0.518565	-2.64818	-0.00968987	0.405851	-0.768447	-1.04462	-3.3254	-0.819124	1.72304	1.3884	-0.613021	0.840298	-3.11158	-2.12504	-1.87486	-2.87467	-1.81523	-2.23512	-3.99498	-4.10778
E2F8	1.96455	2.90556	1.9642	3.10095	2.58543	0.717298	0.452912	3.47341	-0.570246	1.9894	2.3971	1.89931	2.01949	1.20628	-0.58186	-2.86994	1.6667	0.0206835	2.4515	3.11152	2.54047	0.761404	2.14915	1.2177	2.3028	2.14578
OAZ3	1.11	-0.682765	-3.30916	-0.428465	-1.3482	-1.46393	2.30909	-1.94201	-1.76236	0.440846	0.786011	1.86365	-1.29163	-1.82491	0.751078	2.57256	-0.314693	2.70042	-0.852837	-3.25393	-0.322693	0.77878	-1.22194	-1.08023	-1.18026	-0.764131
MX1	3.60105	1.22069	2.26522	4.00181	3.51477	0.69048	4.08383	2.94385	3.96352	2.4517	5.55156	3.61118	1.5749	3.9691	4.09273	2.39464	1.23388	4.33722	1.0432	3.58048	5.633	4.05996	-0.119498	1.75647	0.858602	-0.332438
IL17RD	0.127145	-0.0361279	-1.91245	0.453965	0.356437	-0.0117101	-0.264811	1.74999	0.328779	-0.499694	0.229711	0.657018	-1.14762	-0.659923	3.16051	2.2032	-1.23375	-1.35349	-3.87854	0.534689	-3.78479	-0.961671	-2.99193	-1.26477	-2.02909	-0.654676
MFSD2A	4.57063	4.13984	4.27279	4.49366	5.69438	3.17829	2.82851	5.49115	2.76081	4.45481	3.36571	3.44638	4.74834	2.93004	1.43233	0.719622	5.446	0.645683	6.93936	5.28559	5.53573	3.80169	5.96581	3.68167	4.34532	4.3087
CASS4	-4.39455	-2.00723	-1.26924	-1.25373	-3.73489	-1.99641	-0.147002	-3.10406	0.323531	1.13009	-1.81488	-3.63113	-3.27495	1.21783	-2.90526	-3.70001	-3.84131	-0.545508	-3.175	-0.541965	-2.11735	-1.27735	-3.58051	-3.27559	-3.72224	-1.98994
GRB7	2.53983	2.39076	0.533424	3.01843	3.46731	1.94823	-0.429166	3.05223	-1.22024	2.99785	1.73934	2.98587	3.40329	1.17651	-0.959587	0.313246	-0.00313405	0.407037	1.70393	3.16916	0.469386	1.27361	1.18297	3.00569	2.43417	1.69677
FAM69A	1.33898	-0.00717792	1.22155	1.38882	0.637323	-0.777579	2.97973	0.560588	2.88463	2.59459	2.45603	0.512773	-2.38292	2.13343	-1.23089	-2.12059	1.12458	2.37783	-1.55977	0.279994	1.18011	2.52709	-0.0446187	0.234133	-1.2212	-0.0659773
NR4A2	1.91437	2.58705	3.05541	3.33298	1.42017	3.60585	4.30781	0.554618	0.860979	3.11177	-0.130454	-0.282542	1.91603	0.975036	-2.09276	-2.27205	1.73762	0.346384	2.51513	2.3013	1.30885	2.35855	1.0826	2.93769	1.05649	3.33891
EMP3	2.92915	2.41386	4.37272	3.37256	2.67778	1.29385	5.32169	3.19961	4.62957	5.21387	4.24076	3.14332	2.02496	3.70812	7.4573	6.8264	3.31461	4.93341	0.730531	2.6318	4.52445	4.54147	2.03782	2.23114	1.13865	2.3949
TRIB1	5.30554	6.33021	6.34149	6.4695	5.11332	6.71858	6.37712	6.15395	4.30306	5.6084	2.93853	5.5431	5.83903	4.78683	1.39319	0.210738	4.46627	3.82313	6.88511	5.92593	5.11164	5.05547	4.78447	6.37418	4.99136	6.43447
CD86	3.27203	3.06386	3.68152	3.15808	2.32762	2.34865	5.35887	1.82843	4.56426	5.06493	4.82493	3.38727	1.28511	3.40972	4.73238	4.31757	0.275162	5.21473	0.88641	3.05869	3.73403	4.78393	-0.609671	2.73377	1.34666	2.02196
EMB	1.26954	1.73501	3.81578	2.82587	1.31477	0.635467	4.64853	1.92123	5.12919	5.81709	2.53345	1.13542	0.734031	4.24563	0.067088	0.115712	2.08058	4.50082	0.488453	2.97513	2.1726	3.28607	1.60389	2.40549	0.462199	3.64052
ETHE1	6.41713	5.20963	5.56804	4.62161	6.33795	4.70035	5.03472	6.03733	5.8995	4.82804	4.10763	5.20008	6.50674	4.51545	5.49215	5.80722	8.76403	4.69806	9.405	5.93806	9.2361	7.20116	9.35026	5.62992	6.72044	5.0035
LCK	3.13227	-0.0345784	1.81807	0.492592	0.653647	0.150534	2.30257	-0.630072	1.49489	0.583837	0.636831	-1.36835	-0.500938	-0.691509	-1.2755	-0.222529	0.863502	5.22545	0.168539	1.74488	2.2645	2.00555	1.98247	0.804434	-0.0209829	0.558003
NT5DC3	-0.414136	0.89724	0.593497	0.308	0.0666472	0.0576097	0.976466	-0.246527	5.24587	3.33737	3.50019	1.09016	0.377512	3.34029	0.545079	-0.272834	2.70373	0.867153	-0.419229	0.464344	0.614041	-0.366589	0.566172	-0.163761	0.0180786	0.351425
ESRP2	3.20384	3.69993	3.07096	4.25753	3.51051	4.79679	1.08337	4.11686	2.03605	3.15554	1.4028	3.94692	4.22873	1.54699	-0.509413	-0.123176	3.8794	1.76559	4.7538	4.67897	3.43303	2.18056	4.57228	3.40102	2.99011	2.98839
RIPPLY3	-0.969913	-0.868458	-2.19041	1.49487	3.02804	-0.0601792	1.01172	1.40408	0.483127	1.24347	-2.67172	-0.24801	-0.410587	-0.635652	-1.29876	-1.46047	0.428453	-1.95339	1.87018	0.766883	1.07353	-2.00287	1.3096	-1.21598	-0.773208	-4.12779
BAG2	2.70834	2.73325	1.51815	1.62647	1.5471	0.639501	2.02753	0.930117	5.06867	1.86674	2.63909	1.57079	2.92528	3.89404	-0.867415	-0.477179	3.41025	2.57391	-1.21382	1.5832	1.56194	1.35606	-0.250691	1.80705	2.33153	1.33872
ANKRD22	3.08844	3.09693	3.10779	3.02362	3.47188	2.41584	1.13874	3.33294	1.57765	2.96355	1.4388	2.58259	3.22451	2.94636	-1.31459	-1.41032	2.96036	0.921817	3.76249	3.34263	3.67091	2.14452	3.43824	2.98082	3.96959	3.10319
GIMAP8	0.925384	-0.332811	0.766714	-0.658435	-1.78851	-0.626337	2.89136	-1.12528	2.54303	2.40675	1.70699	1.08191	-2.95328	1.66262	-1.13624	-2.11657	0.87234	3.7023	-0.388471	0.714417	0.441186	0.877273	0.991847	-0.631779	-1.55249	-0.680893
KIAA1755	2.22823	3.32974	2.1381	2.27749	0.847315	2.8705	2.85276	2.56147	1.05334	4.70239	2.42888	1.1446	3.05413	3.94898	1.19367	0.72139	-0.608054	1.91662	-1.25702	4.21256	0.621637	1.6757	-0.904745	3.44984	3.08104	0.50341
RGS16	0.0244615	1.51822	1.83201	-2.51436	-1.02913	-1.5535	2.40658	-2.4572	1.85458	1.6978	-0.724118	-1.41929	1.62493	0.742929	-1.26961	-1.88736	1.89693	1.0958	3.02545	-0.560002	1.44855	1.16375	2.27431	-0.483146	-0.569852	-0.961932
CLCN2	2.21724	2.2816	1.58302	2.53256	2.73955	3.00323	0.661157	2.06447	0.62883	0.357552	0.777359	2.40535	2.45045	2.16465	-0.466903	-1.11589	3.6794	0.76851	6.10536	2.81534	4.8052	1.87178	4.53957	2.20077	2.74539	2.69913
TMEM200A	1.17465	-1.40988	0.528251	0.862852	1.26791	1.62455	1.99198	2.31553	1.46609	2.04264	1.77145	1.05875	-0.209785	1.33937	2.28017	0.917096	-1.1237	-0.0451143	-3.34972	2.39904	0.135981	0.558375	-2.48182	-1.00788	-2.50251	1.62354
GLIS2	0.161256	1.1995	1.18143	0.920537	-0.0154223	-0.969913	3.88405	1.2788	2.86109	3.55761	3.73369	2.66828	-0.0505921	2.3409	4.94939	3.27044	1.44499	2.31585	-1.17037	0.742963	1.25255	2.32413	0.327319	0.619591	-0.234221	-0.463889
FGFR1	1.62634	3.48068	2.79754	2.12216	1.22002	1.81768	4.55639	4.06748	4.16278	3.91099	3.52257	3.62664	2.3334	4.10304	5.87902	3.86118	3.38227	2.14327	-0.56796	2.42352	2.35109	2.85255	1.57495	0.595341	-0.65506	0.424793
VSTM4	0.838581	0.129547	0.116138	1.16523	0.424223	-0.0220973	2.87599	-0.777769	1.84128	2.30768	3.36492	1.4686	-2.12188	2.09048	3.70967	3.45963	1.69057	1.74133	-0.0725055	0.176591	1.71114	1.72336	-0.477129	0.915934	-2.59393	-0.562838
LPXN	3.83204	0.73127	2.58349	0.946379	0.335506	-0.0473981	3.15067	-0.304974	1.99697	3.01796	2.75366	1.46139	-0.760103	1.04346	1.37558	0.844394	0.0562089	5.11725	-1.17896	1.77085	1.94671	2.09262	-0.0747707	0.805037	-1.39397	0.0932086
CD40	3.65899	1.14435	3.57199	1.4178	0.958828	1.71556	3.19645	0.745435	2.88012	2.77703	3.10558	2.51334	0.0499513	2.41483	3.26909	4.31565	-0.255751	5.3854	-0.910708	1.26719	2.42902	2.90213	-0.524583	1.53342	-0.476318	0.78188
SOCS3	3.99204	5.49001	5.79958	5.37014	4.83514	4.97407	7.43605	5.48152	5.72701	8.04796	3.62919	4.4333	2.65277	5.72515	3.73785	3.1965	2.19988	4.15439	1.65663	4.98893	4.55165	5.6154	0.941948	4.63684	3.44491	4.93836
VAV1	3.04736	1.37595	2.41071	0.969985	0.0878566	-0.392525	3.25359	-0.992799	2.81731	3.50115	1.95275	1.41942	-0.315102	1.46007	2.165	1.55229	-0.779083	4.2751	-2.10228	1.11956	1.35246	2.11379	-0.713457	1.142	0.237282	1.89912
FCER1G	4.26197	4.95901	5.83249	5.3421	3.80122	4.49945	7.46161	4.58179	7.48646	8.11167	6.79132	5.88146	4.15388	6.18782	5.85405	5.94756	2.67528	7.05352	2.98691	6.11217	5.91249	6.72875	1.28245	5.07366	4.67246	5.15733
PTGFR	-1.74131	-1.90272	0.487188	0.221122	-1.72335	-0.396588	2.43951	-2.939	1.58814	0.789938	3.18917	-1.12864	-2.74012	0.616188	-2.06839	-2.86097	-0.783003	-0.271747	-0.664487	-0.341221	0.528321	0.307662	-1.8489	-0.664599	-2.57817	-1.53825
DYNC1I1	0.0392788	-1.54857	-0.499294	-2.93333	-1.60958	-1.096	0.605874	-2.28829	-0.270307	-0.575048	1.39406	-2.86973	-0.764577	0.810715	-3.73468	-3.59171	0.591287	0.766807	-3.66151	-2.03031	-1.46948	0.570521	-3.26202	-0.341217	-1.41623	-1.59208
VSIG10	3.49306	4.01594	3.15887	3.72511	3.27853	4.16233	3.30723	3.72267	2.93304	4.33841	4.18695	5.41561	4.20159	2.85181	-0.3445	-2.78056	3.44504	2.08882	3.89526	3.92013	3.64472	3.00285	4.12993	3.69686	3.54194	3.6264
ERCC6L	1.33569	1.17511	0.0863762	1.71313	1.57862	-0.364574	-1.01827	1.363	-1.3212	0.641454	1.3932	-3.7207	1.49102	1.03693	-0.540277	-1.14768	-0.249951	0.0311552	0.216722	1.53226	0.493668	0.235457	0.466256	0.888328	1.83539	-0.0675155
ADAMTS4	0.722029	2.99272	4.05209	1.75587	0.662178	0.0610434	4.67652	0.813771	2.38756	4.84536	2.17919	2.105	-0.0498287	1.26095	1.86775	0.296487	-0.256294	0.728948	-0.825949	0.212171	0.398657	1.045	-1.2552	1.17884	-0.578364	0.296099
NR4A1	4.59663	6.77714	5.52481	6.75477	4.38258	6.29525	7.52869	4.82215	4.54447	5.99539	2.51985	2.08112	5.45019	3.61022	2.99925	1.96018	4.09467	2.32882	5.96167	5.62963	4.94623	5.79077	3.0686	6.94533	3.63241	5.74463
EDIL3	1.37239	3.2754	3.7296	3.63436	1.62925	1.11742	0.720795	0.863574	1.96488	4.1132	4.27521	3.1513	1.81535	2.13463	-0.382034	-2.0695	2.6829	-0.488813	2.43642	2.49843	4.35029	4.46195	2.98657	2.69088	0.981707	2.55734
EPS8L3	4.38439	5.01322	4.39467	4.47479	3.84534	4.56421	1.89068	4.71495	1.69016	3.61381	2.8007	3.75323	4.51937	2.95775	0.722982	-0.0208527	4.59085	1.80978	6.59604	4.5525	5.6313	3.24168	5.11345	4.1577	4.30755	5.63398
LIMD2	6.33481	3.02516	5.51714	4.7755	3.80539	2.31231	5.48178	3.066	5.04339	5.05241	5.12077	3.09836	3.36891	4.654	3.43711	3.01876	3.28478	8.22661	0.572734	4.64093	4.27865	4.58623	2.16311	4.11976	1.74217	3.31587
ANKRD34B	-0.978048	1.28945	0.0980152	0.331487	-1.55742	0.691204	-4.58572	-0.321488	-0.940908	0.353967	-3.57993	1.14619	-0.597105	-2.18934	-2.44983	-3.58631	-0.963056	-3.10709	-0.20343	-0.0785439	-2.37319	-0.329379	0.109855	-2.5058	-0.473575	-1.61116
LURAP1L	3.60417	4.34459	3.77193	4.58384	4.03561	4.11109	2.066	4.94291	1.86754	3.01922	1.73531	4.61535	4.30439	2.37702	-0.718942	-1.24525	3.45236	2.09703	3.96165	4.04294	4.18206	3.80709	3.8714	3.68397	2.14407	4.3068
GATSL3	0.369751	-1.72959	-0.589244	-1.51004	-1.53842	-1.29096	1.75483	-0.998846	1.12153	1.3251	1.46177	0.234698	-1.6009	0.655059	3.68809	2.84514	0.313246	1.77577	-2.07584	-0.837493	0.121705	-0.716981	-0.82979	-0.922979	-2.24367	-2.22565
IGDCC4	0.899044	0.227569	0.737419	0.642859	-0.620377	0.238188	4.00544	-0.594432	1.27297	2.1858	3.13011	1.69287	-0.835973	1.49861	-1.0274	-2.24456	-1.6381	1.80457	-2.85705	0.0468542	-0.954666	1.02081	-1.41434	0.186602	-0.79998	-1.24143
SRPK3	0.861995	-0.219992	-0.885913	0.846225	0.602932	1.24599	-1.08992	-0.130239	1.97219	0.759275	1.05426	0.289646	-0.166025	1.91693	-1.29271	-1.122	1.8496	-3.3819	-3.63764	0.715384	-0.956639	-0.721159	-1.32097	-1.33582	-2.57988	-1.571
ATP8B4	-1.06701	-0.219445	-0.0128334	0.302641	-1.95323	-0.332807	2.76677	-1.16917	1.54261	2.15164	1.68422	1.12754	-1.4872	0.871252	0.608961	0.406689	-2.08116	2.02254	-3.66346	0.0695097	-0.0357064	0.817181	-2.4056	0.0124829	-2.69498	-0.0474845
ELL3	4.58892	0.114114	2.7647	0.157212	0.152209	1.2521	1.27219	-0.948912	0.265581	-0.832866	0.965906	1.09175	1.79101	-0.97252	-1.00594	0.40293	2.35703	4.54929	2.43073	0.42233	2.09592	2.12519	3.04927	1.72793	2.03274	1.13356
ADCY2	-1.5267	-2.60961	-1.37376	-3.79818	-3.49474	-3.49858	-2.68024	-4.56588	-4.31924	-3.10534	-0.168124	-3.44906	-3.32008	-2.55875	0.561918	-1.32969	-2.38058	-1.56223	-4.97927	-4.78559	-2.94703	-0.700969	-1.75602	-5.02111	-4.79211	-5.2583
COL6A2	3.58876	5.05491	4.72282	4.84698	3.11346	3.26996	7.4872	2.69019	6.45689	6.56603	7.13547	6.28588	2.16241	6.5259	6.90048	4.76918	5.45654	4.49326	3.26825	3.44091	5.73643	5.58343	4.30215	3.67518	2.54842	3.76278
FAM92A1	3.18039	2.51441	0.912343	3.9151	3.96727	0.958813	3.35758	3.44381	4.30932	3.37459	3.80122	3.06421	2.7651	4.75324	4.00276	4.63216	3.37265	3.54471	0.146147	3.17967	2.023	2.92484	1.08174	2.4196	-1.37784	-0.280405
GNG11	3.83018	4.24823	5.66227	4.49529	4.28647	3.94936	7.67247	2.40691	7.43357	5.81054	6.1706	4.60941	2.69902	7.25641	4.84907	6.38316	6.3707	6.42993	3.2012	3.31769	5.58189	6.38229	4.00554	5.65329	3.1643	5.3467
SNX31	2.94361	3.52452	3.37329	2.91401	3.86282	0.869461	1.80564	3.68053	2.93858	1.64545	1.94171	1.55499	4.74735	3.76291	-0.298859	-0.212081	2.44387	-0.648978	-1.2181	2.78883	1.48791	2.48983	0.437782	4.36205	3.09942	1.1669
SOWAHA	1.04595	1.68258	2.25909	1.53988	-0.245037	1.32307	0.308105	1.15762	-0.0090524	1.87375	0.928313	0.770584	1.83068	0.79033	-2.35605	-1.52375	2.12166	-1.60997	3.89544	2.26163	2.66976	-0.382267	3.34238	1.18672	0.0896066	1.7914
DNAH10	0.259194	0.265029	-0.0561987	0.424094	-0.323857	1.05171	0.0128118	0.656908	-0.1843	0.347405	-0.578879	1.72237	-1.91575	-1.67979	-3.03218	-3.3067	-1.67656	2.28519	-0.171199	0.55509	-3.03659	-2.61518	-0.492237	-0.378744	-1.13522	-1.96273
PLXNA2	0.945248	1.68281	1.9407	2.93428	0.999214	2.24787	3.27379	3.97211	0.427113	4.38083	1.48213	2.54032	1.21742	1.43002	-2.09342	-3.31271	1.13171	0.368221	0.728077	2.60253	1.28242	1.11542	1.60012	1.28199	1.61104	0.199625
RNF144A	2.44506	1.53377	2.10106	2.27854	2.56271	1.16659	3.49459	3.07181	2.65387	3.59617	2.77923	2.65716	1.02434	2.84287	3.68511	2.64214	0.813943	3.34524	-1.83829	2.34687	1.74749	1.89429	-1.60376	1.1372	-2.52378	1.01266
TRIP6	0.325099	0.449102	0.843614	3.39324	2.92469	2.14613	3.3038	-0.874566	2.86465	3.42068	3.70959	3.36517	0.468865	2.37048	4.16318	3.88818	3.22658	1.22243	-0.0124463	0.484045	2.3095	3.00926	0.38841	3.26273	-0.419345	-0.361353
IGFBP4	5.31287	4.69031	7.07024	6.21835	4.45194	2.65751	9.1573	4.6298	7.97687	7.70792	6.5608	5.37205	4.49543	7.75926	4.2896	2.3781	5.61142	6.13935	5.03104	5.17277	6.34571	6.4399	4.72925	5.63778	4.2498	3.34744
MEF2C	4.10395	1.28605	3.15127	0.382557	0.772316	0.403104	3.892	0.0192749	2.92318	3.28368	2.90372	0.905998	-0.516438	2.45936	1.93835	1.17352	2.32243	5.22107	1.51205	1.18564	2.50115	3.29349	-0.0378449	1.04063	-1.42531	-0.207936
ARHGAP20	-3.13023	-1.79745	-1.23401	-1.70746	-3.50616	-2.80357	1.20669	-4.44925	0.604347	-0.0457471	-0.571669	-1.83082	-3.36336	-0.715045	-1.90077	-2.55422	0.607219	-0.219441	-0.17992	-1.11441	-1.87434	-1.9822	-1.28718	-2.50607	-4.66579	-4.07728
PRRG1	-1.64254	-0.655044	0.997813	0.378179	-1.57616	0.708143	2.40821	-3.18159	1.63793	1.77783	1.47414	2.25654	-2.72584	1.75708	0.389181	0.926933	1.42154	0.567049	-0.133782	-1.40494	1.70289	-0.355282	1.29568	-0.695571	-2.50157	-1.06839
SASH3	4.86406	1.21081	3.7626	1.4645	1.22155	1.27205	4.51884	0.791414	3.27299	3.33971	3.42155	1.78779	-0.201392	1.97911	1.28963	0.98959	0.854012	6.22285	0.235298	2.38824	2.2566	3.12908	1.50791	1.95308	0.3747	1.62749
AMPD3	1.3465	0.505556	0.441398	2.08821	0.856022	0.858896	2.24643	2.71176	0.754477	1.46493	-0.673619	1.35375	1.38006	0.98743	-2.63118	-4.32504	0.873081	-1.96472	1.98895	2.622	1.14397	-0.163968	1.4528	-0.666292	0.120909	-0.0700651
FASLG	-1.8488	-2.33868	-1.08197	-3.47829	-2.32664	-1.13286	1.05805	-2.25054	-0.757094	-1.37661	-1.3814	-4.65203	-4.99229	-1.52747	-4.39314	-2.18482	-2.20304	1.44835	-1.17334	-1.24568	-0.518536	0.202988	-1.82944	-1.00835	-2.27408	-1.38907
ACOX2	-0.11747	2.15639	1.02462	1.02577	-0.626217	0.275639	0.941482	-0.766571	1.48195	0.466006	0.510162	-1.27288	1.90827	0.835172	-2.99341	-2.88499	2.16355	0.364472	3.35298	-0.463301	2.89811	0.786454	2.79262	1.7432	1.89679	1.51325
BIK	1.95909	1.22415	2.49249	2.54439	2.117	0.897573	0.622171	3.16773	-0.859729	2.1443	0.96584	0.686119	2.37986	1.61454	-3.12342	-2.06363	-1.09881	1.99218	-0.908334	2.18824	0.387054	2.00681	-1.41501	1.77388	1.92101	1.9316
PLA1A	-2.96789	-4.13299	-1.04827	-4.05408	-3.31743	-1.47691	0.860446	-3.23003	1.65147	-0.818821	-1.49236	-2.48554	-2.41657	-0.735259	-1.4317	-0.0446307	-2.47932	0.235984	-3.53248	-2.20308	-2.74653	-3.11316	-1.89997	-2.8735	-5.4521	-2.58243
PTPN7	2.05038	-0.80696	0.618248	-1.42588	-1.39497	-1.03259	2.07217	-1.41485	1.00947	0.953414	0.673873	-0.708576	-2.87705	-0.189568	-1.54512	-1.68953	-1.9867	3.49219	-1.9788	-0.311872	-0.606428	0.631151	-1.491	-0.833207	-2.55493	-1.68649
ZBTB20	0.106991	-1.1148	0.525337	-0.64465	-1.93827	0.796664	2.25516	-2.84092	1.1485	1.39315	1.43856	0.147294	-1.28416	1.44501	1.72158	1.81604	1.65759	1.37736	-0.682525	-1.77473	-0.289568	0.857368	-0.603062	0.211561	-4.49079	-0.260411
PITPNC1	1.42113	0.598156	1.5785	0.63964	-1.09819	-0.381985	2.88757	0.542763	1.72176	2.71123	1.0095	0.870108	-0.783715	2.49522	-2.74347	-2.15902	1.01571	2.85249	-1.24149	0.0777762	0.61438	0.455723	-1.52893	0.46998	-1.49003	0.416007
PRTFDC1	-1.13295	0.363586	1.55063	0.15339	1.76226	2.0497	1.32244	0.557944	2.37877	2.83284	2.76268	1.68511	2.8953	0.967146	5.39143	6.16804	2.43744	0.949699	3.22458	0.0270408	3.843	3.30979	2.8045	1.62841	1.93504	3.65877
ARHGDIB	5.72129	2.87635	4.32078	2.44072	2.11031	1.82526	5.63452	1.52721	4.62075	5.30888	4.84367	3.62774	0.545889	3.58572	3.22392	2.83933	2.92623	7.2992	1.68702	3.25968	4.3973	4.82263	2.63067	3.00814	1.01701	2.52642
SDK1	0.0620526	0.717579	0.0999146	0.0359195	0.615388	0.360443	0.659304	1.86561	2.58263	-0.030774	-1.96836	1.2723	1.14532	0.319918	-0.183526	-1.77531	1.57704	-0.781048	0.0814214	0.505108	0.0176084	-0.735805	0.857264	-1.80362	-2.22208	-5.16964
SPSB1	1.65644	1.23688	3.56845	2.16178	1.78617	1.14813	6.29987	2.98155	3.53315	3.98535	5.0014	3.88601	1.03851	3.08905	4.60336	3.86928	2.79382	3.21015	0.18697	3.56668	2.22359	3.46217	0.83573	1.49733	-1.09342	2.26914
APBB1	0.361892	0.162945	1.17089	-0.0358764	-0.153331	-1.04625	3.07023	-1.61115	3.75443	2.62037	2.91762	0.812194	-0.300553	2.86686	3.42585	2.52986	2.63119	1.64848	-0.369395	-0.692583	1.75369	1.30432	0.662762	0.708293	-0.63933	-0.437778
PODXL2	1.19769	1.6814	-1.34196	0.194629	0.541981	-1.93075	-2.23445	1.54899	-3.26306	-1.60415	-2.6333	-0.693402	2.56109	-1.03168	0.7554	-0.521533	-0.0152678	-2.19398	-0.867313	1.10151	-1.9725	-1.61717	0.0274372	0.0535006	-0.165486	-0.709623
HHIPL1	0.336592	0.119887	1.24304	0.390492	-1.1419	-0.496521	3.03182	-0.662387	1.70255	4.0778	2.15581	2.19154	-2.34022	0.968533	0.643034	-0.0579998	-0.0616796	2.13475	-1.68606	0.187312	0.564554	1.64502	-1.28658	0.527861	-2.656	-1.12791
SOX18	0.607939	-2.07686	1.20802	0.505749	-0.738159	-1.04266	1.69801	-1.38574	2.19835	3.28186	2.42455	0.640241	-0.337293	1.02884	4.16683	2.62058	1.52708	1.362	-0.522432	-0.352359	2.1973	0.436684	-0.928284	0.723462	-0.0470388	-1.08584
GPR160	3.67962	4.14435	4.66955	4.65922	5.04254	5.40129	2.82897	3.67922	3.43384	3.606	4.91141	5.1763	5.31412	5.06809	1.08904	0.97966	5.69613	3.71702	6.33555	4.53735	6.52945	4.97293	5.69736	6.18329	5.23933	5.75054
TEF	1.51927	-0.0772526	-0.102753	0.012583	-0.0557382	2.38787	2.28154	1.91469	3.70974	2.20711	2.83842	1.86128	0.87219	1.3478	4.56912	3.59889	4.12014	2.06256	4.16082	1.62305	2.81063	1.65126	4.21449	0.0729564	0.00976279	0.00357345
KCNK1	4.74984	5.05273	5.50481	5.21952	4.95803	4.58313	1.51219	4.56449	2.41082	4.04832	3.31001	4.66344	5.12094	3.82629	-0.144627	-0.453486	3.69197	2.38484	4.09881	5.13627	4.9373	4.6366	4.22366	5.02837	5.06671	5.35024
PID1	1.46254	1.00764	1.31322	1.12145	-0.026931	-0.284237	1.82625	0.0430645	2.47597	4.55773	0.734742	0.368187	-0.590845	1.95666	3.82172	3.59617	0.398175	1.69718	-2.57388	-0.510597	1.49532	2.02481	-0.228931	-0.298891	-0.877908	-0.527593
ZNF630	-0.83738	-1.8179	-3.66911	-2.08103	-1.53125	0.212607	-1.64146	-3.12913	-0.29825	-2.51532	0.0396578	-0.290799	-0.0466558	-0.29991	1.45088	2.8766	0.127528	0.147359	1.12897	-1.0711	-1.92907	-1.99637	1.08102	-0.271024	0.191512	-3.94183
CHRNB2	-2.72151	-1.53168	-2.26077	-3.35201	-3.64373	-2.99916	-2.56868	-2.63602	-3.73614	-2.16119	-2.89736	-3.91681	-2.31309	-2.0226	1.96707	0.617195	-3.39238	-2.71105	-5.07696	-3.80413	-4.30632	-4.2871	-3.5244	-5.91048	-2.65327	-4.66766
PLCB2	1.33107	-0.585364	0.70771	-0.127375	-1.97459	-0.520445	2.70566	-1.23287	1.68566	2.02563	2.14409	0.705438	-2.55432	0.426179	0.200655	0.210015	-1.79331	3.52434	-2.45342	0.280956	-0.681316	0.611182	-1.67477	-0.32821	-1.62264	-1.12153
ATP1B1	6.00434	6.48691	6.62571	6.74715	6.49736	7.67476	4.9428	6.25233	5.11691	6.12727	4.76189	7.05139	7.22415	5.47979	2.98816	1.86789	8.00983	5.84911	9.16255	7.31978	8.52133	6.38848	8.40245	6.58912	5.48395	6.54512
CLEC11A	1.19985	1.99642	2.50467	2.37592	2.19914	0.837628	6.03197	0.754708	1.37946	3.24893	5.18895	3.38707	1.69315	2.61389	5.67	4.28786	1.27131	3.11329	1.03931	1.70703	3.26533	3.0952	1.06333	2.03946	0.872277	1.43049
2018-09-05	0.62294	1.49335	1.35911	0.805936	0.500047	-0.701485	3.52876	0.388542	2.80004	3.07086	3.86473	2.00801	0.340881	2.1612	4.66565	3.37472	1.88834	1.19405	-2.38502	0.877383	1.0725	1.40415	0.545879	0.84847	-1.28888	0.026361
FUT4	3.19505	4.06541	3.93185	3.74722	2.09873	4.16012	3.70194	3.21873	2.86209	4.47547	3.32865	4.30773	3.74786	1.6845	-0.066728	-1.77244	4.47785	2.7819	5.73799	3.68632	3.53401	2.41366	5.12477	3.30688	2.31152	3.74081
SLC11A1	1.95884	3.57176	3.31397	3.47371	2.52501	2.23391	5.37731	1.98071	4.6515	5.5623	3.16529	4.28437	1.46495	3.53033	2.93554	3.15434	-1.25961	3.33648	0.731574	3.37212	2.17691	2.99545	-0.47451	1.43301	2.38881	2.9122
PON2	5.18763	5.0539	5.42735	6.17154	6.87515	5.80518	5.57407	6.35619	5.7782	5.04889	4.08751	6.58473	6.12367	5.90457	3.58861	2.89699	8.18964	4.31863	9.12886	6.78771	8.3236	6.47997	8.89357	6.57101	4.67776	5.43329
ENO2	1.81791	-0.183833	1.40783	-0.447375	-0.453812	-2.13232	2.03004	-1.90145	0.922746	2.4196	2.00635	0.529561	-0.262749	1.1636	4.31815	3.7502	0.887291	2.81874	-0.246212	-1.03111	0.918211	0.227236	0.571211	-0.270455	-1.2052	-0.821452
STARD9	-2.77789	-2.15893	-0.948951	-1.52269	-2.50744	-2.35184	1.01453	-3.31254	1.15244	0.442981	0.830702	-0.741071	-3.93313	0.465107	0.647775	1.19101	-0.248108	0.25336	-1.44856	-1.56442	-2.72165	-1.40552	-0.660769	-1.7357	-3.27136	-2.55285
IL10RA	1.49542	1.77524	2.96499	2.63449	1.44013	0.49133	5.59403	1.68767	3.59856	4.6277	2.44885	2.48502	-0.742171	2.06687	2.43642	1.8762	-0.241349	3.15645	-0.789856	2.31396	1.1043	2.51536	-0.0789872	1.10433	-0.539457	2.67194
PNPLA3	1.07943	-0.971244	-0.646171	-1.41224	-0.327957	-4.18626	0.0154119	-2.60186	-3.48302	-2.29269	-2.1325	-3.12198	-0.972775	-4.07272	0.710746	0.278734	-4.51414	-0.35875	-2.17482	-0.959481	-1.72671	-2.49736	-2.2632	-0.928663	-3.87534	0.534101
FGD5	-0.423439	0.364169	0.434818	0.866971	-1.83918	-2.9105	2.2908	-2.26037	0.645148	2.7508	1.23025	0.627738	-3.15721	1.74253	-0.776558	-2.82886	0.636107	0.510111	-1.27142	-1.05242	0.279293	0.370108	-0.423211	-0.868105	-0.959239	-2.51056
SHROOM3	3.52681	4.5909	3.6159	4.28619	3.45244	3.65581	1.25417	4.31481	3.1737	3.60342	1.51471	4.40062	3.79903	2.97236	-1.0657	-1.80058	3.44602	0.683921	3.55593	4.7282	2.10686	2.0684	3.38341	3.14073	2.97623	2.97518
LDB2	0.346588	1.27698	2.00836	0.322517	-3.14325	-0.516565	3.34487	-0.663479	2.07603	2.61756	2.87535	1.62955	-0.963602	2.53332	-0.221465	-1.01772	2.16518	1.96485	1.25377	-0.171175	2.39101	1.64733	1.56062	0.992123	-0.817582	-0.164947
SNPH	-0.583268	1.21056	0.22864	-0.543842	-2.89541	0.755229	-1.0555	-1.41153	0.531648	-0.436424	-0.737324	0.298998	0.17562	0.193065	-1.56952	-2.56902	0.802706	-3.97976	0.239618	0.686218	-2.19594	-3.05596	0.754717	0.442917	-0.177374	-2.92206
EMILIN1	2.19424	3.19151	3.85151	2.78482	1.49339	1.46724	5.05422	1.79333	5.31516	5.84541	4.62557	3.90114	0.657219	5.11887	3.08285	0.86557	4.55331	3.61746	1.06549	1.93109	4.12495	4.04178	1.96584	1.98249	0.820395	1.51701
GALNT16	-1.24635	-2.14927	0.621965	-0.261263	-1.85601	-3.7803	2.63948	-1.204	0.449461	1.61688	2.05631	-0.690598	-1.76055	1.75342	-1.71039	-2.65755	-0.182382	0.590578	-2.23082	-0.507437	-0.408522	-0.12674	-1.18015	-0.797874	-2.46709	-1.46257
ALOX5	0.00715244	0.92967	1.88491	0.881328	-0.46665	0.178568	2.51099	-0.479929	3.22509	3.42128	2.14848	1.5698	0.0346242	1.99184	1.46476	1.00864	-0.311902	0.538697	-2.65312	0.720856	0.20122	1.42965	-3.36334	0.808344	-0.660425	2.22671
MRC2	1.27433	1.26572	1.85303	1.12674	0.206468	-0.644133	4.29505	1.49963	2.29501	3.2031	3.86956	2.32298	-0.137576	2.6484	3.7356	1.8054	1.71287	1.60391	-1.73565	1.03741	1.0571	2.15048	0.339251	0.591277	-2.00216	-0.533622
SLC44A3	2.38179	2.9081	2.05161	3.11252	2.46021	2.93973	-0.201346	2.45678	0.411643	1.75994	2.08402	3.34511	3.44741	0.86051	-0.780656	-1.55196	2.99458	0.547726	2.52011	3.15665	2.97917	1.88057	3.48792	2.54749	3.02299	2.52774
NYNRIN	-0.559951	-0.633669	-0.661072	-0.128418	-0.706785	0.309432	1.76144	-1.04261	2.85433	1.74192	1.62273	0.827494	-1.56676	2.03592	-1.80733	-3.23337	1.64004	-0.076367	-1.17576	-0.448276	-0.302185	-0.11845	0.0994972	-1.35141	-1.79183	-3.12526
PIK3R5	0.909128	-0.51108	1.48643	0.777216	0.8969	-1.15591	2.41567	0.537336	2.038	2.592	0.691436	-0.357916	0.552574	1.07374	1.56923	0.972119	-1.34005	2.82416	-3.78493	1.44996	-0.657397	0.772848	-1.39874	0.054904	-2.62869	0.0281306
ELOVL7	2.96775	4.07798	4.27802	4.45548	4.83722	3.94479	3.14584	4.42689	2.30568	4.54073	3.20325	4.72004	4.96672	2.69243	-0.577806	-1.3941	2.88596	3.04991	3.78502	4.71914	4.19047	4.5714	3.07083	4.38711	3.48462	2.47677
RAB38	-0.247916	-1.41958	0.453849	-0.135697	-0.117337	-3.76949	0.475116	-2.14934	-0.292306	2.89027	2.56684	1.91877	-0.740852	1.54966	-0.6679	-1.68621	1.15117	2.27977	-0.782975	-1.53644	1.10122	1.66872	0.267164	0.00183106	-1.43632	-1.02253
RNF152	-1.24376	1.63852	1.82002	0.174304	-0.748667	-0.899544	1.54425	-0.828896	0.426587	2.18467	-1.3837	0.152897	1.75284	0.019218	1.01051	0.737384	3.24616	0.34235	4.41903	-0.346889	3.06102	1.6254	4.0754	-0.0934896	1.0198	1.15986
POU6F1	1.17375	1.2463	1.55077	0.92798	-0.16404	1.10926	2.35622	0.802044	3.06594	2.16226	2.38435	1.34272	0.675274	2.61834	-2.41983	-2.95533	2.46362	2.44047	0.864248	1.06726	0.280838	1.14085	1.11548	0.755153	-0.426044	-1.73126
ZDHHC15	-2.0567	-4.85275	-1.12432	-3.9641	-6.57075	-0.188098	-1.18039	-1.15319	-0.439162	-0.585585	-0.607474	-2.10567	0.062702	-1.22978	-0.52618	-1.95281	-0.917504	-3.00975	-1.04521	-2.53346	-0.535221	-0.346813	-1.08075	-0.475156	-0.927024	-1.78449
SLC27A1	1.29561	-0.484576	1.36335	0.46447	0.127356	2.59167	3.23832	-0.291168	2.82739	2.7689	3.22106	1.94809	-0.52935	2.35655	5.33247	5.02979	2.84815	3.74205	0.994963	1.40622	1.06755	1.40182	1.20512	0.718658	0.337951	1.21318
HIPK2	1.59066	3.17173	2.12199	1.36545	1.34609	2.46297	3.61275	2.04125	3.59872	4.39383	2.42259	3.80571	1.53731	2.14262	-0.929135	-1.22527	4.20114	1.71102	5.95781	2.38083	2.95594	1.60453	5.15369	1.23365	2.12192	2.41701
SEMA6A	2.53198	2.98404	3.10974	3.13373	2.6077	2.11161	2.26428	2.7634	2.55357	3.08283	2.15241	2.45218	2.60636	2.82713	-1.32088	-3.06542	3.85174	0.639454	4.83126	2.86129	3.29669	1.92969	4.16523	2.44303	2.03669	0.794453
SYTL2	1.97213	2.21574	2.91105	2.08425	1.1383	3.52173	1.08276	0.677341	2.29714	1.72677	2.19814	3.5942	3.19938	0.121055	-1.11957	-1.52432	3.66345	1.19582	4.5778	2.71126	3.57658	2.97123	4.41747	2.76788	2.49608	1.72399
C1QA	5.58396	5.83898	6.32354	4.60389	4.45681	5.05045	8.69043	4.68347	6.56935	4.44331	7.14769	6.58127	3.69554	6.03435	6.33575	6.57261	3.4984	7.13598	1.51263	5.3853	5.81098	6.80285	2.26945	5.65962	4.53981	4.38275
HMHA1	4.41	1.40534	3.50301	2.77012	1.8338	0.839919	4.52741	1.90324	2.82158	3.56487	2.12303	1.91632	-0.509222	2.79467	3.13479	2.83733	0.604451	6.24063	-0.436514	2.08845	1.27082	2.0233	1.24724	1.84136	0.122288	1.5627
ANKS4B	3.71501	3.83426	3.13237	3.25377	3.91814	3.62449	1.47944	2.62354	2.02072	2.68537	3.21493	2.88178	4.91209	2.07641	-0.176921	0.641583	5.02323	2.65011	6.10078	3.41129	5.64373	4.18819	5.56912	4.6598	4.40897	3.01591
GCH1	2.61429	3.14291	3.90845	3.52562	3.44976	3.19802	3.0558	2.33321	2.04842	3.31142	1.89227	2.6548	3.54992	2.50533	-1.86139	-1.88915	2.08293	2.75286	4.19776	2.23801	4.65153	3.38513	2.34238	3.96553	3.05746	4.494
CDKL4	-3.86663	0.60844	-3.36299	-3.80875	-3.68178	-0.330005	-1.23685	-2.97184	-2.08711	-2.41792	0.408266	-0.775599	-0.148188	-1.14151	1.47505	1.60054	-2.11485	-0.570736	-0.698457	-1.58717	-1.49736	-2.13517	-1.93176	0.0229146	-0.912483	0.0633925
B3GNT5	1.87225	1.03057	1.56111	1.82628	2.19491	2.19731	0.800852	1.59633	1.45059	1.29718	1.66717	2.35592	2.10069	0.97914	-1.66813	-1.21772	3.69963	3.18656	4.84718	1.95135	3.53633	3.03412	4.5168	0.598794	1.91743	2.94882
MMP14	3.10172	4.19917	4.49889	4.90534	4.27562	3.1231	6.62956	5.18526	5.03683	7.27531	6.18142	6.15564	1.9645	4.87027	6.62313	4.60522	3.15599	4.73424	0.760519	4.60293	4.00281	5.22255	2.26841	3.20382	2.30559	2.66408
COL5A1	3.18918	4.49658	3.94249	4.76922	3.56773	2.59116	6.88428	3.19074	5.42817	6.62962	7.28543	6.03997	1.5096	5.73658	5.00036	4.12034	3.81638	3.58193	2.05506	3.91011	4.10216	5.28441	2.4453	3.04395	2.00744	2.81298
CAPG	5.24731	4.30969	4.378	5.96433	5.87639	3.16086	4.4518	6.25566	3.83983	6.3097	4.24811	5.60333	4.78436	4.20181	5.57591	4.46229	1.19727	4.85761	0.799941	5.86966	4.14195	4.7967	1.0123	3.89998	3.84283	3.00661
MEIS2	1.2817	1.41219	1.9151	2.13318	1.27504	3.25303	2.4045	1.60558	4.26565	3.40829	3.13302	2.71753	-1.59207	3.8031	3.4888	2.97667	3.62705	0.350554	-0.843886	2.35948	1.30633	1.24156	0.547667	1.58194	-0.986411	2.34896
KIAA1549	-2.83002	-1.70101	-3.72554	-2.09408	-2.91291	-5.26427	-1.32323	-1.81707	-0.831535	-0.770582	-2.29871	-1.42745	-3.24575	-1.22429	0.20196	-0.614262	-2.10288	-1.31483	-3.0222	-2.19915	-3.82229	-3.38531	-5.3553	-3.85048	-5.93408	-3.21468
SCD	5.9332	5.73191	5.02146	5.80222	6.06491	4.13654	5.72931	7.19639	4.02549	5.51594	3.62429	6.47124	5.75902	5.22265	1.03999	0.0405278	3.87061	5.10975	3.16674	5.98681	4.46002	3.91049	3.45658	5.64564	4.85325	4.30641
SYK	5.04598	2.20874	4.35903	3.24124	2.66533	1.11565	3.86336	3.38315	3.89677	4.78579	3.19489	2.40153	1.82871	3.56485	1.10806	0.449693	-0.0214866	5.37227	0.56508	3.46357	2.37941	3.02486	-0.0295512	3.78569	1.92517	1.67122
PTPRN2	0.546364	-0.323057	2.18962	0.100655	-1.5882	1.78718	-2.82573	-0.809183	0.438016	1.67295	-0.585674	0.169681	1.89213	0.862693	3.83288	2.7098	1.08532	-1.87642	-1.2558	-0.243062	1.93446	-0.394555	1.54185	-0.771087	0.168681	0.047329
SLC43A2	3.67044	4.78743	3.20461	2.9381	2.26511	1.19846	3.66239	3.56821	3.77432	5.22443	2.56779	3.12505	3.19519	2.6304	1.9826	0.82559	4.21332	3.11059	6.92159	3.75358	5.13032	3.19006	5.02386	2.74158	3.01655	1.82899
NEK10	-1.8023	0.714224	-0.743922	-0.597143	-1.19993	1.68352	-0.238596	0.38928	0.200919	-2.30899	-0.532635	1.43249	-0.603225	0.0145838	0.525267	-0.131163	-1.71436	-2.81838	-3.31209	-0.254923	-2.98378	-2.30618	-3.54098	-2.04087	-3.5649	-2.58326
EGFLAM	0.0860908	0.423793	0.557925	0.271282	-0.83154	0.312142	2.90817	-0.911381	0.817934	1.77888	2.67016	1.47079	-1.14807	1.16767	-1.90939	-4.71137	1.28953	-0.24892	0.414049	-0.588674	1.81876	1.35693	0.625214	0.36455	-0.389971	-0.257576
ZNF366	-0.273514	-1.46927	0.044604	-0.799666	-2.87618	-2.55825	2.05995	-1.96402	0.955975	1.36857	1.63983	-0.25617	-3.50008	0.386083	0.83015	0.142492	-0.416313	1.19856	-1.90311	-1.67044	-0.76505	-0.989948	-1.17491	-1.94469	-2.35986	-3.47414
ABCA1	3.57841	2.94615	1.87502	3.49221	2.8257	2.92309	4.40135	5.98807	3.23486	4.95374	3.17964	4.22764	1.74171	2.78363	3.56699	2.51482	1.05909	2.9672	0.748496	4.27248	0.519482	1.86416	0.247283	1.60304	-0.337053	0.355952
TPPP3	3.72601	3.82914	4.78758	5.02486	3.93198	2.55473	4.36233	6.00291	3.83494	4.28822	4.75396	2.89537	4.09217	4.27825	7.59909	8.15955	4.15902	3.43695	2.41408	3.8076	5.01091	4.90095	3.86633	2.54863	1.84505	7.56374
MAOA	4.77516	5.84404	5.61723	5.0096	3.83262	6.12914	5.45988	3.68905	5.72543	5.97606	5.58585	5.68432	5.79469	5.83321	2.07438	0.249045	7.25996	3.31155	7.22022	5.09686	6.89273	4.86118	7.49269	5.39445	5.79789	4.74826
MAP4K1	3.9703	1.78942	2.90155	1.22285	2.52391	1.86496	2.32711	1.14311	1.40495	1.41788	1.97306	1.24514	2.29289	1.11143	2.49798	4.44956	0.57222	4.52265	-0.323855	1.79401	1.9137	2.61215	1.24093	1.84149	2.67338	1.75316
ZNF454	-2.57797	-5.08399	-3.94295	-3.17985	-2.9513	-2.9746	-0.933422	-2.67298	-1.27568	-2.64711	-1.35406	-3.14743	-2.73324	-1.33709	0.0371432	0.412933	-1.70236	-0.367689	-5.53718	-3.55783	-2.61439	-2.33007	-2.4886	-3.46202	-4.07413	-5.86007
TRIM47	0.193507	0.48388	1.51048	-0.189118	-1.04762	-1.72423	2.40342	1.09641	1.72656	2.43788	1.43021	1.16307	-1.08463	0.890836	4.19919	3.14032	1.05084	0.858769	-1.91246	-0.346492	1.63151	1.35806	-0.692434	-0.0740385	-1.98385	-0.957555
RHPN2	3.05839	4.05704	4.15998	4.42508	3.88033	3.92593	1.18963	5.16115	0.387352	3.45132	2.44463	3.65471	4.50451	2.66982	0.292723	-0.392823	2.56821	1.68747	3.74659	4.33877	3.95789	3.59454	3.19736	4.10693	4.06003	4.01382
HTR7	-1.90065	-0.604036	-0.262336	0.0369182	-2.13945	-1.27734	1.78756	-0.514798	1.73987	2.62151	0.868284	-0.62506	-3.04654	0.0243481	-1.58922	-2.09888	-1.46746	0.78535	-1.13952	0.290424	0.431698	1.01062	-1.75234	-1.22741	-3.65334	-2.52516
MYO7A	-1.4894	-2.49303	-1.4512	-2.62876	-3.52803	-2.01857	1.55154	-3.48227	-0.526539	-0.0403263	0.913025	-0.849001	-3.94292	-0.967846	-0.976969	-1.31941	-1.49285	0.716262	-4.67167	-1.68852	-1.722	-1.39966	-3.06202	-1.79394	-4.43359	-3.30005
CYP2J2	2.03724	1.54848	2.21663	0.913676	1.36614	-0.689164	2.41431	0.169566	0.91458	3.3376	1.14312	-0.419802	2.70343	1.11113	1.73642	1.41912	3.25348	2.70414	5.42099	1.01747	4.57037	3.1842	3.88233	1.98559	0.360847	2.68519
NOL3	0.103195	1.00574	-0.779358	0.381239	-0.107008	-0.570396	3.7286	1.58212	2.52816	2.60326	2.98799	2.04261	-0.275743	1.43621	4.90207	4.84504	2.01553	1.91825	0.344215	-0.318425	1.53219	1.73034	-0.725344	0.93546	1.0132	0.201521
BATF	3.45892	0.401259	3.52569	1.71568	1.32963	0.785048	4.00904	1.54563	2.48386	1.97727	3.76501	1.32136	-0.830049	1.29856	1.49593	2.03809	0.0104361	5.16158	-1.7056	2.14965	2.58944	3.00008	-0.0868199	1.55493	1.31561	1.58322
PDLIM4	1.84185	0.902807	2.38314	0.54585	0.227692	1.08489	3.85053	-0.181465	4.42606	3.77064	3.65918	3.57767	0.233041	3.37841	2.3439	1.54255	3.29606	2.92968	-0.612825	-0.0827195	2.87092	2.82355	0.372629	1.13479	0.0833291	0.0156831
DDR1	5.21579	5.78902	4.74063	5.68391	5.20597	5.10083	1.66491	6.32352	2.36164	4.1512	2.77004	5.54563	6.13552	4.00689	1.38753	0.867841	3.71348	2.58874	3.60039	6.00678	3.92402	3.20994	4.20119	4.7344	5.28783	4.7957
RENBP	1.08338	1.1196	2.38108	1.27471	1.13245	1.06129	4.40249	0.98676	3.17801	3.17934	3.48087	1.49685	-1.15502	2.09526	5.44248	4.63103	0.528291	2.78466	0.476351	2.1691	1.62952	2.2606	0.579451	0.823717	0.555757	-0.57339
C11orf52	3.53401	2.67816	2.58735	3.99857	4.32475	4.0843	1.02819	3.69416	1.84316	2.25054	3.1441	4.55964	4.1827	2.44428	-2.1781	0.796664	2.64886	3.36779	3.1158	2.6369	3.77141	3.48957	2.96839	4.10612	2.22573	2.60614
SCARF2	0.779142	0.418654	1.87573	1.83766	-0.324782	0.338715	3.97584	-0.364389	1.48071	3.48161	4.08265	3.34689	-0.798334	0.497372	4.11542	2.22837	0.267488	1.65795	-0.605402	0.473215	1.92853	1.83507	-0.251817	1.0291	-1.15781	0.265905
FOLH1	2.07266	2.10646	2.20012	0.0750397	1.37682	1.95213	4.82627	-1.69113	1.29525	4.6739	2.7928	1.78891	1.23404	2.26746	0.516802	0.751438	2.20841	3.54743	2.70725	-0.615685	3.88538	2.27444	2.57345	3.6182	0.724816	3.62753
EVA1C	0.775118	1.02589	2.12221	2.23981	1.21424	2.83537	3.23765	2.45734	2.57652	4.08173	2.32914	2.35561	0.38798	2.74414	0.631924	0.0423782	2.92502	1.63849	-2.82678	1.35581	1.11502	2.64813	-1.38955	0.658143	-0.133579	2.15112
SHROOM4	-1.98626	-0.948795	-1.03465	-0.355411	-2.357	-1.28183	1.42893	-0.154376	-0.348469	1.71078	0.576338	0.00409145	-2.12027	0.270876	-2.75932	-5.36753	-1.2238	-1.57682	-0.751351	-0.430021	-1.30812	-1.66273	-1.64028	-1.47	-3.92445	-3.78174
PAPPA	-1.64751	0.229391	-1.01938	-0.803987	-3.05861	-1.88864	1.02005	-2.85219	-0.434912	1.62855	0.188679	0.107125	-2.60245	-0.423704	0.820273	-0.224113	-3.69345	-1.39464	-3.60886	-1.39285	-2.70402	-1.05698	-4.2511	-2.45927	-2.11505	-1.29011
RASGRP2	3.32403	-0.277016	2.49511	1.46905	0.372083	-0.24849	3.30966	0.200203	3.53041	2.51217	1.90469	0.148088	-0.207576	2.93262	3.03289	3.24311	2.43681	5.56422	-0.274531	1.05038	1.5052	1.63812	0.461413	1.5061	-0.465765	0.845446
KIAA1161	-0.912651	-1.52768	-0.801257	-1.37887	-1.19463	-2.81008	0.401084	-1.54586	2.34076	0.524375	-0.379455	-0.196753	-0.697537	1.34077	1.79617	0.656496	1.26204	-0.512024	1.27301	-1.66051	0.207618	-1.03457	0.188806	-1.97699	-2.03009	-3.65783
MVB12B	1.07277	-0.20465	0.586424	2.06143	0.297696	-1.40895	2.54078	1.51012	2.33793	2.40445	2.21593	0.986972	-2.363	1.70852	1.94987	0.707781	0.746717	1.77628	-2.47203	3.01147	-0.318011	0.581274	-1.34629	-0.290972	-1.09421	-1.47434
PTGS1	3.42891	4.15348	4.59674	5.18268	3.7752	2.56404	2.18596	4.39035	5.88732	6.68003	5.12752	-0.721915	3.34799	6.22611	4.05283	3.3693	4.88968	1.72572	2.24191	4.14175	4.14605	3.30005	2.84565	3.82415	2.35915	3.39399
TRIL	-2.62156	-1.05039	-2.06056	-0.568505	-4.25951	-0.531665	2.2169	-1.85204	0.99769	0.685698	-0.980514	-0.859075	-1.37431	-0.00666765	-0.417712	-3.3411	0.0658756	-1.26503	-0.951624	-0.738821	0.168886	-0.6698	-0.871451	-2.85303	-2.01604	-2.70656
VLDLR	2.22565	3.28599	3.47302	3.01544	2.53134	3.32628	1.36911	2.37429	1.88142	2.91736	1.32273	3.62762	3.7006	2.25727	-1.72169	-2.36557	3.3833	1.59196	4.20915	2.32799	3.42085	2.42241	4.06827	4.66317	2.8534	1.97105
ZDHHC22	-0.735793	-3.51314	-1.75863	-3.14049	-3.27421	-3.55826	-0.662492	-3.59497	-1.25849	-0.695991	-0.373019	-3.55413	-3.69697	-1.03075	-1.14376	-2.53032	-1.92937	1.41052	-4.77929	-2.24154	-1.92624	-1.87067	-1.93238	-3.49699	-5.58031	-4.46978
KCNK5	3.937	3.83052	2.92389	4.69155	3.7222	2.12986	1.71689	4.34376	0.400691	2.29875	3.34209	2.58338	4.05008	3.32229	0.851567	0.316852	3.74593	2.21324	5.32561	4.33036	3.75002	2.23001	4.27026	4.08385	4.25369	3.57362
PDGFD	0.722466	2.26872	2.33861	4.11976	4.36215	1.7199	4.18271	4.42884	4.51426	3.38509	3.14219	1.71725	0.787892	3.74293	-0.031514	-0.374296	3.50923	1.18256	0.839831	4.46433	2.40982	3.22621	1.01635	2.39169	0.979835	1.69453
FLT3	-0.146907	-0.988647	0.386524	-0.927403	-0.77594	-1.89068	1.54353	-0.341501	0.174125	1.92903	0.280683	-2.608	-1.48503	-1.00613	1.39223	0.81286	-2.25338	3.09666	-1.97542	-1.55512	-0.361466	0.499976	-2.11491	-1.12527	-1.09941	-2.19546
IKZF2	-1.29805	-1.61808	-1.57758	0.0342157	-1.93238	1.1817	0.757894	-0.386334	0.0259076	-1.07767	-0.658185	1.12504	-5.02511	-0.695059	1.39564	1.59734	-1.4501	1.40196	-1.03237	0.146225	-0.575454	-1.29538	-0.83629	-1.05392	-3.89942	-1.25289
GFRA2	0.0282438	0.847508	0.356324	-2.5385	-2.51768	-2.11001	-0.539876	-2.0421	3.58109	-0.314899	-0.843049	-1.11528	0.487816	0.908751	0.292169	-1.31283	1.70297	-0.82418	-0.969475	-2.94914	-0.307176	-2.32579	0.0206835	-1.70667	-2.36475	-2.54513
ME3	1.152	1.4893	1.19307	1.07235	2.47389	0.966578	3.91609	2.31718	4.14057	2.81628	4.07139	2.94491	2.46635	3.08838	5.79924	5.9508	3.55186	3.26039	0.197501	0.715243	2.69303	2.79907	1.06325	1.015	2.55396	0.182069
CYGB	1.38073	1.86114	2.35668	2.04141	0.910556	-0.0332388	4.24893	1.03521	1.56671	3.7856	3.7878	2.71188	0.0760939	2.22643	-0.411172	-3.59292	2.07247	2.35075	2.16364	1.4255	3.29867	2.86437	2.16348	2.00037	2.4014	1.28941
BIN2	2.75991	1.11366	2.81496	1.56002	0.731244	0.0290217	3.72202	0.531229	2.93453	3.14803	2.49546	0.952565	-0.202001	1.89055	0.0300253	-0.283566	-0.280631	4.90768	-0.587342	2.12559	1.48183	2.91413	-0.193663	1.27182	-0.488141	1.79034
C11orf63	-3.10577	0.435362	-1.88698	-5.97998	-2.48725	-4.66006	-1.73036	-1.78783	-2.87831	-1.4179	-2.9488	-4.61218	-0.336422	-2.29397	-3.82881	-3.06063	-2.6764	-2.74851	0.247259	-1.98175	-1.34927	-3.8929	-1.53332	-1.34892	-0.827489	-1.38072
ZFP37	-0.211136	-1.48744	-0.866805	-0.372875	0.811257	-0.725344	1.50385	0.0574017	1.359	0.145821	1.10225	0.827543	-6.07369	1.61364	1.01488	0.914672	0.634472	1.24339	-1.81258	-0.11169	-0.773265	-0.402714	-0.059041	-0.771912	-0.970291	-1.24919
PDZRN3	-0.390697	-1.87333	-1.15253	-0.72932	-1.51449	0.298963	1.05746	-2.48197	2.43175	1.26834	1.97108	-0.514435	-1.4907	1.49477	-0.448924	-2.33421	1.84905	-0.715701	-0.944274	-1.28531	0.156966	0.170425	0.681332	-1.17992	-2.64669	-2.20338
RDX	3.03786	1.47628	2.89316	2.28366	1.71256	0.955015	4.68801	2.27863	5.64303	4.2007	4.94565	2.99919	1.63581	4.59058	4.93064	4.15435	3.79585	4.25693	0.827973	1.70121	3.00855	3.3797	1.76757	1.83103	-0.191266	1.71197
PPP1R16B	2.79178	-0.141721	1.99746	-0.869341	-0.630745	-1.52438	2.12895	-0.737945	1.16286	1.44487	0.362352	-1.00993	-2.74365	0.72711	-1.23413	-2.4099	0.946252	3.72364	-1.0729	0.412565	0.516045	1.46671	0.351979	-0.546397	-1.83049	-0.674043
ZBTB46	-1.0023	-1.48228	-0.679827	-1.91302	-3.22255	-2.55641	0.727528	-2.93322	-0.671237	0.976708	0.624653	-0.691192	-4.29484	0.52312	-0.92478	-2.82877	-0.524432	1.56887	-2.09	-1.60858	-1.85426	-1.70821	-1.52106	-2.85907	-3.19242	-3.84045
LRFN4	-2.23194	-2.08805	-1.58435	-0.835384	-1.76331	-3.02019	1.14755	-1.58366	0.0574849	-0.0539205	1.15183	1.4347	-3.52553	-0.0202556	1.43198	-0.143462	-1.41759	-2.32373	-4.48517	-0.490487	-1.3234	-0.392116	-3.12817	-1.78155	-3.00158	-1.38098
TNFAIP3	3.1363	5.85967	5.45594	5.11809	2.87167	3.72124	4.51456	4.42729	3.66627	6.97684	2.42337	1.7727	2.06555	3.99307	2.08152	1.36466	1.32898	3.68378	2.14854	3.8398	2.49782	3.85119	1.34255	3.87313	2.33234	4.34963
WNT5A	3.20736	4.24326	2.63917	5.19154	2.70244	1.82318	2.18842	4.10954	0.277199	5.77886	0.282096	1.93997	2.0681	2.41145	0.662871	-0.150761	1.18854	0.599727	1.89631	3.78456	1.86818	2.84846	0.365659	1.62818	1.95717	2.69931
TAGAP	1.54328	0.867303	2.23119	1.29975	0.564817	-0.300386	2.25745	0.766909	2.63331	2.643	2.15439	0.500853	-1.24053	2.11467	0.204241	0.440516	-1.86838	3.81814	-1.31912	2.07847	0.591823	2.60915	-1.76836	0.562924	-1.16885	1.45471
ARHGEF37	0.805524	2.69318	1.13662	0.724353	1.26395	2.4104	0.283744	0.529821	-0.134959	1.65015	0.83242	2.07827	2.15662	0.682564	-2.90445	-4.21143	2.20623	0.73696	1.8856	1.79659	1.00556	-0.253166	2.74475	0.768129	0.7528	0.408027
CECR1	0.87637	0.419755	1.55983	-0.0965776	-0.478033	-2.14409	2.04814	-0.783464	1.2688	1.56605	1.69218	-0.167505	-1.38973	-0.562764	0.129362	1.03697	-1.20408	3.40561	-2.03895	-0.266087	0.983371	2.81874	-0.979999	0.22158	-1.11305	-1.4582
CD44	6.97091	7.76746	6.96895	7.4342	6.53643	6.3291	5.78248	7.94771	5.40699	7.58892	5.20153	7.53101	7.07838	6.16017	5.71005	4.11939	3.28123	5.96177	2.27746	7.54373	5.01626	6.01115	3.12732	7.26081	7.00445	6.47506
TST	4.31428	4.16673	4.84127	3.62688	4.59391	3.99913	3.59231	4.4038	3.38012	4.02933	2.68327	4.21668	4.1127	2.4805	2.55882	1.41178	6.61361	2.65721	5.59134	3.8537	6.78368	3.969	7.20569	4.30268	4.60017	4.54212
SEMA3F	5.01495	4.48476	2.29966	4.76057	5.00449	5.92766	3.42238	5.79548	2.90949	3.85373	2.69952	4.56577	4.79794	2.71773	1.0639	-0.070209	3.07966	1.33703	1.87669	5.88527	2.6351	1.98555	2.19157	2.99892	4.76513	3.15793
RGAG4	1.54268	1.32456	1.80994	1.14268	0.529571	0.978906	3.91841	0.0532643	3.55428	3.29571	4.24464	2.23172	1.10331	3.01616	5.20157	4.88051	2.9331	3.43748	0.0858733	1.78117	0.896241	1.55369	0.785843	0.99004	0.135798	0.0468123
APOE	8.70596	7.51162	9.09519	6.0995	6.61625	6.39179	10.1208	6.23543	7.38704	8.4404	11.0824	10.3659	6.27028	7.70068	8.85562	8.07924	7.0002	11.0899	6.0756	6.89421	8.4718	9.47884	6.443	7.13625	6.59295	6.40034
TMEM86A	1.23221	0.0254541	-1.02208	-0.393419	0.897457	-0.713301	2.5368	0.553547	0.701957	1.47798	1.81016	1.56097	1.3677	0.621543	1.06534	0.842392	-2.08572	2.08766	-3.6477	0.16877	-0.0442141	1.33132	-3.18429	-0.500728	-1.09032	-1.41606
SEMA6D	0.0387312	1.98842	1.58418	-0.369544	-2.68157	0.304698	2.68151	-2.10988	1.08225	3.01811	2.1908	-0.879988	0.736839	0.752766	-0.94221	-1.78351	2.09654	0.924617	3.03843	-0.309502	2.16627	1.38681	2.41581	0.676421	1.09108	2.22136
HSPB1	6.33436	4.65556	6.12306	5.95846	6.90843	3.86711	8.28512	7.27302	9.24125	7.46353	7.55232	6.06191	5.75897	8.0817	8.28161	7.24698	8.56979	6.75401	4.69472	5.57607	6.54326	5.91708	5.74248	6.73748	3.07633	5.73186
SNX25	2.16917	2.7714	1.81994	1.3309	0.853006	1.60637	1.58326	1.80334	2.34527	2.89543	1.98196	3.11008	2.86922	2.37996	-3.73709	-3.08485	2.19579	2.46006	2.33942	1.12243	1.24893	1.26466	2.00066	2.04807	1.29764	1.19825
ZNF385A	3.65356	2.98823	1.63254	2.93005	3.38964	0.868955	5.0796	1.96636	3.1449	3.69063	3.12268	3.04907	2.11209	2.92668	5.59362	4.56339	0.354091	3.63155	-0.438323	4.23681	1.28449	1.71047	0.641195	1.79107	2.62793	0.0612923
RBMS2	-0.33478	1.18251	0.473797	1.44023	-1.31972	2.06416	3.42978	-1.50648	3.32744	3.27865	3.00959	1.51349	0.123176	2.17992	3.74624	3.02058	1.98913	1.01808	0.0806849	1.64054	1.26437	1.57216	1.09989	0.832039	-1.32295	-0.828724
PDE9A	3.2954	2.5655	1.72057	0.597259	2.1788	2.03103	1.07743	-0.384723	3.29759	1.84394	0.0768053	1.06734	3.21209	2.09486	1.96541	1.49016	3.51673	0.875607	5.61337	2.29655	4.67661	1.74714	3.92849	2.5459	3.71523	5.57986
CCRL2	0.522598	-0.418458	0.653885	0.18254	-0.297623	0.625738	0.440718	0.153455	3.14337	2.05091	2.00526	-0.217424	-0.980742	0.99974	-2.31015	-0.409742	-3.98872	2.67234	-0.990366	-0.0642808	1.37002	1.44316	-1.76313	1.00844	-0.833482	1.24823
RARRES2	5.35525	4.02889	5.72706	6.21806	5.50491	2.95868	7.65292	5.82851	6.92116	6.79146	6.65488	4.51999	4.61227	5.68742	7.84676	7.7375	5.62459	7.00226	2.29399	5.5875	5.21409	5.89151	3.35304	4.45943	2.77871	3.46015
SMOC2	6.89691	7.27402	7.88788	8.79054	8.02699	6.47712	6.09797	8.77806	5.13827	6.44069	6.02194	3.94026	6.6063	7.65005	5.36868	4.10476	6.24006	4.98054	4.12762	9.24476	5.47685	4.77355	4.97266	7.52246	7.07379	4.09723
SLC16A6	-2.50111	-0.584356	1.3101	-0.757165	-2.20381	-2.29048	0.236903	-1.92465	0.141001	0.913768	-0.894719	-0.40901	-1.67125	-0.516427	-2.80757	-3.46573	-3.67692	0.36464	-3.45645	-0.487747	-1.04157	0.846818	-3.23451	-1.74726	-4.01917	-0.584006
KLF4	5.49104	6.73771	6.89948	7.18631	4.97532	6.67343	6.83039	4.54234	4.51918	4.98677	3.84117	5.33647	6.24538	2.84043	6.66525	5.12371	7.04456	3.69953	8.44403	6.67456	7.60629	6.01443	7.75018	6.35158	4.93817	6.71526
OLFM1	-0.320405	-3.3561	-0.636187	-3.62903	-3.8323	-4.94458	-0.597573	-3.68486	-0.427943	-1.53641	-0.925621	-2.48178	-3.77178	-0.110611	0.918806	-0.41844	-0.668508	-0.521312	-2.90117	-2.11641	-1.55873	-2.61552	-0.677172	-3.55493	-3.63685	-2.58974
GJA5	0.714584	-0.134523	1.52482	1.09245	-0.387259	-1.68671	2.79651	-0.330692	2.1	1.74653	3.58269	1.87029	-0.587433	2.25376	-1.91136	-1.17391	0.759999	0.650856	-1.47261	-0.67252	0.959058	1.27469	-0.573725	1.63948	-2.17085	-1.19055
TGFBI	4.22707	5.42201	5.616	5.82968	4.37866	4.03484	5.36503	4.74258	6.88201	7.21615	4.90723	5.37204	3.93339	7.40057	1.80654	0.676123	5.23999	4.53912	2.68286	5.06384	5.46074	5.32833	3.44374	4.40153	3.19268	4.483
C1QTNF5	1.96559	1.55716	2.90314	1.21229	0.597679	0.53078	4.58667	-1.47714	3.32086	4.58247	5.72965	3.76039	0.968223	2.98517	2.36405	1.60774	2.53606	3.50712	1.90887	1.35052	3.14045	3.27242	1.37323	0.952975	1.21578	1.04179
FHIT	3.34403	3.39843	3.97679	2.48922	3.73101	4.65597	0.707207	0.353312	3.65157	0.450464	4.39549	4.4506	3.89472	4.19099	4.04675	4.87865	2.32306	3.92756	0.236499	0.126286	4.82053	2.28307	3.69811	4.19694	3.90334	1.84059
FMNL1	3.32313	0.92845	2.63959	0.987052	-0.0626285	-0.289402	3.40025	-0.285003	2.85589	3.15425	2.55481	0.988935	-0.722748	2.10832	0.976708	0.493442	0.586827	5.17223	-0.325523	1.476	1.75112	2.3192	0.868892	0.953235	-1.28727	0.977734
PARP15	1.59417	0.394745	1.90252	1.64646	0.733025	0.709114	3.06952	1.52518	3.21435	2.68479	3.26862	2.19476	-1.01301	2.25159	3.25789	2.34483	-0.129376	4.10168	-0.857754	1.97841	1.53366	2.09021	-1.09486	0.986899	-2.01854	-0.427108
SYT7	-1.23618	0.574925	0.86401	-0.525133	-2.54059	-1.18013	0.752252	-2.88909	1.01824	1.49809	0.823594	-0.887455	1.0429	0.57863	-0.102756	-1.58403	2.69975	-0.933336	2.76949	0.288961	1.13294	0.144112	3.51302	0.422373	0.571949	-2.06435
MCTP1	-2.0526	-0.0245518	1.21606	-0.0789171	-1.71429	-1.46044	1.92713	-1.79179	1.29324	2.48949	1.36488	-1.0341	-2.69617	1.22609	1.13983	0.154946	-0.206745	0.610927	-0.966159	-0.686898	0.568178	0.136191	-1.07241	-0.70955	-4.57216	-0.695713
TMEM71	0.71057	-1.3045	0.529131	-1.04714	-1.36046	-2.36879	1.19776	-3.0443	-0.034379	-0.275896	-1.06694	-2.16872	-2.52098	-0.447906	-1.25505	-0.790454	-1.74891	3.55356	-2.7073	-0.615833	0.00784134	0.605589	-1.27014	-2.34037	-3.70152	-0.809605
PKIG	1.00651	1.61664	2.5213	-0.986559	0.547144	-2.40552	1.98647	1.67269	2.68484	1.14783	2.89017	1.33925	2.05244	2.20238	2.91731	3.87508	4.05434	1.89745	3.11214	0.196418	3.69194	2.89648	3.85788	2.59745	2.24413	0.850479
HMGN3	5.52646	4.97558	4.36815	5.41514	5.63836	5.49535	3.30269	4.80516	3.17093	4.23008	3.8958	4.25895	5.20805	3.52548	-0.60086	0.195121	4.07421	4.3231	3.57274	4.85863	2.79585	3.64608	4.44	4.92419	5.66264	4.64478
SGK1	4.63959	4.4652	6.45305	5.90475	5.11413	6.67433	6.1929	5.19712	5.06229	5.18987	2.90761	4.13587	5.06037	4.74945	1.61954	1.18522	4.54756	3.47198	8.0171	5.80072	5.11725	4.66157	4.9789	5.67393	4.84522	6.83688
COL7A1	0.134037	1.04713	0.0372276	1.96195	-0.0980855	0.808204	-0.834586	1.1914	-2.47347	3.6005	0.815149	2.51221	-1.40653	0.74792	1.27608	0.441792	-2.00659	-0.305132	-1.88619	-0.358001	-0.52757	1.18954	-1.63724	-0.236181	-0.247498	-0.900091
ZNF532	1.86214	0.252767	1.60406	3.43359	2.48476	3.6214	4.58683	2.9596	4.59331	3.74724	3.78766	4.00802	0.950707	3.72757	2.17454	1.9467	3.20847	2.11623	3.12824	4.00483	0.833238	1.86513	2.74098	1.12153	-1.16376	-0.267284
XDH	3.03636	3.9509	1.87006	2.8269	2.55079	3.33434	3.09447	2.3811	2.57938	2.59788	1.3471	2.95159	3.36337	2.86973	-1.74221	-2.26383	3.0432	0.44472	3.23647	3.88065	3.85579	1.20632	3.65626	1.93321	2.90065	1.48618
LBX2	2.01829	-1.18504	1.82462	0.1137	1.16955	3.69899	0.392251	-0.375886	-1.28411	0.318427	1.12297	-0.00213822	-0.0455342	0.129863	0.198532	1.78453	-1.39247	1.79054	1.88368	1.20681	-2.45057	-0.889402	0.408734	1.9816	2.42138	1.73385
RGMB	3.99923	5.99408	5.47048	5.80806	2.20892	4.29466	2.15261	2.31639	6.30539	5.06013	5.2621	3.93588	6.5803	5.4378	2.0029	1.40363	5.27353	2.07145	5.13054	3.19419	4.74017	3.83264	5.34201	5.81719	4.82959	4.32147
SNCAIP	-2.77303	-2.46224	-2.39698	-3.45169	-3.90774	-3.71933	-1.08829	-0.99395	-0.995074	-0.448099	0.452089	-1.23075	-2.7569	-1.02975	-4.63014	-4.77043	-0.510996	-1.87823	-1.72298	-3.80045	-0.880585	-2.12274	-1.75133	-3.08676	-4.44052	-5.31632
MFNG	2.80884	0.533284	1.86869	0.292758	0.229268	-0.515559	4.88272	-0.298582	2.63385	2.90312	2.57305	1.31491	0.600669	1.20652	0.607342	-0.705032	1.21141	4.59108	-0.438202	1.3938	1.37197	1.94884	-1.09361	0.760894	-0.677931	-0.241504
NLGN2	-0.565103	-0.0580373	-0.58014	-0.348989	-1.20581	-2.42782	1.29052	1.40716	1.29939	1.09797	1.22878	0.276211	-1.1855	1.00149	1.35848	-0.0297707	1.00367	-1.31597	-3.91157	1.12015	-0.853358	-2.75127	-1.91128	-0.63358	-2.39709	-2.4398
CD2	2.82863	1.18497	2.06727	0.415056	0.288914	0.770558	3.05303	0.599356	2.90378	1.48058	3.62029	0.318068	-1.07081	0.0207262	1.08513	1.24547	1.38346	5.43658	0.0270125	2.37629	2.26426	2.81496	2.22888	0.788226	0.0564171	1.49595
BAALC	-1.91567	-0.0356176	-1.10039	-3.93915	-2.15273	-4.07708	1.88016	-2.14168	-0.458963	-1.42031	-0.571873	-0.656237	-2.04705	-0.127696	-3.89005	-3.73931	-1.5468	-0.753964	-0.211899	-3.02172	-0.019397	-1.98027	-1.98789	-3.02096	-1.56225	-4.25961
BTBD19	-0.674895	-1.85381	-1.10987	-1.42898	-1.1521	-1.53776	0.83758	-3.25023	-0.323307	0.427681	1.7416	0.720769	-1.25222	-0.0152809	3.51806	3.21081	-1.57139	0.734222	-0.364242	-1.71586	-1.29486	-0.183058	-2.31465	-0.694823	-0.468162	-0.472928
DNA2	1.44433	2.89378	1.11195	2.1604	2.43588	0.140713	-0.576587	1.91499	-1.2726	1.00766	1.30755	0.960571	2.11006	1.66275	-0.799224	-2.93259	-0.244485	-0.014195	0.394295	2.28111	0.883738	0.0240927	0.0575958	1.27133	1.87682	1.79413
PLXND1	1.43921	1.81713	1.74379	1.54433	0.124222	0.360567	4.76337	-0.0678617	2.4564	4.54476	3.84079	3.04518	-1.71456	2.87695	1.24191	0.58244	1.66035	2.945	0.388278	1.40778	1.31531	2.1207	1.21315	0.751738	-0.724919	-0.340722
KLHDC1	-2.95346	-3.9937	-2.03801	-2.74984	-2.65271	-3.30757	-0.235854	-3.25298	0.169951	-0.958799	-0.419897	-1.79779	-3.23882	-0.504352	1.0017	0.981626	-0.610341	-0.00758975	-2.18631	-3.84835	-1.80796	-0.912162	-1.62984	-2.71618	-2.73831	-3.8259
PIK3CD	2.75366	0.0202568	1.74226	0.883097	-1.27079	0.370287	3.5565	-0.0949341	2.59308	3.25475	1.8321	0.896752	-1.47311	1.48519	1.35029	0.914664	0.152755	4.50687	-1.21006	1.39494	0.379366	1.00927	0.597231	0.316517	-1.4746	0.565831
ARHGEF15	-0.555132	-1.96375	0.116045	-0.263579	-2.50359	-1.8249	2.23518	-2.38075	1.12864	2.03177	1.95114	0.260026	-2.68832	1.08652	1.19501	0.412012	1.42542	0.169207	-0.43331	-0.925656	0.799087	-0.428368	-0.284565	0.118187	-2.07959	-1.82755
GNMT	1.88006	3.46072	2.01948	2.41877	3.16314	3.17241	-0.02975	3.36808	-0.46459	1.19961	1.07198	2.68614	4.61443	0.731618	-1.37719	0.993392	2.90406	0.792772	1.09381	1.96313	2.21568	1.61509	3.32836	2.3264	2.60808	2.94979
PLCG2	3.22685	1.38789	2.19522	0.392603	0.269021	-1.34096	1.85984	0.655279	0.879376	1.91939	1.33712	-0.395915	-0.269479	0.876322	-1.27402	-1.92253	-0.890276	3.59621	-2.23508	0.0183778	0.619864	2.06735	-0.949282	0.200768	-1.31391	-1.23486
RASGEF1A	-0.675256	-2.63737	-0.0983465	-3.74365	-2.39908	-4.2486	0.189502	-2.69325	-1.47745	-2.04404	-1.11126	-3.4395	-3.26936	-2.16141	-0.0473578	-0.215997	-3.95399	1.58848	-3.13675	-1.63162	-2.51433	-1.0454	-2.69238	-2.22975	-3.20115	-1.63757
GJA1	2.70538	3.61251	4.85441	4.30012	3.39104	2.42561	7.59262	4.1717	4.66755	6.38139	5.26772	2.56342	2.33579	4.65457	3.73856	2.08218	5.5659	3.55217	1.66653	3.49374	4.01731	3.89472	2.54818	3.06239	1.16888	2.24591
CCDC180	-0.460806	1.04692	0.439123	-2.44743	-4.15962	1.13961	-0.557196	-3.16364	-0.937171	-0.182576	-0.188098	-0.292951	1.98903	-1.7951	-0.591312	-0.533441	0.401106	-0.673111	1.61077	-1.16247	1.27453	0.384216	1.21059	0.918997	0.724537	-0.464359
SH2D4A	2.15505	1.64067	1.83687	2.26306	1.34937	2.96765	0.0489197	1.80873	1.66823	1.73843	0.804392	1.95749	2.34831	0.788928	-2.83482	-4.03505	1.72657	-0.812818	1.33684	2.51113	1.28204	0.840226	2.14538	1.57531	0.934524	1.48496
CCDC88B	1.54947	1.91538	1.29448	1.03353	-0.838796	-0.82916	1.12113	0.43549	0.582334	0.584068	2.40489	-0.422963	0.013841	0.539898	-1.52568	-2.84659	-1.4898	2.42155	-0.926454	1.44817	-1.25518	-0.499131	-0.61753	-0.527167	1.79164	-0.133655
B3GALNT1	0.823383	0.877854	2.28144	1.09792	1.53196	2.22465	4.29563	2.01452	3.9805	3.87055	3.71002	2.17319	-0.195902	3.10185	-0.765207	-0.132293	3.52866	3.34669	2.83193	1.62734	3.97064	3.93789	3.65211	1.24005	0.276961	0.573665
TMEM176B	3.59637	3.14061	4.82903	2.78308	1.7967	2.41857	5.77567	1.08168	6.99314	5.60188	5.32563	3.28021	3.28986	6.05679	6.23839	4.94392	4.37219	4.67286	2.46458	2.65825	4.64837	4.22333	3.27954	3.22811	2.21395	1.91895
FGD3	2.152	-0.629186	1.71373	-0.280131	-0.895242	-1.48404	2.58938	-0.429916	1.21306	1.49923	1.25025	-0.44459	-0.454882	0.627504	-0.331885	-0.309175	-0.905969	3.80464	-1.34832	-0.46011	-0.129702	1.09802	-0.546104	-0.681971	-2.66064	0.515127
TBXAS1	1.58315	2.65114	3.55566	1.67152	1.31406	3.72242	3.8267	1.0154	3.28688	4.39643	3.49733	5.29933	1.84224	2.23532	2.05194	1.56478	4.74871	3.24126	5.26926	2.69457	5.02037	4.14385	5.25217	1.44326	1.62074	2.09479
SLC7A5	4.20883	5.03245	5.27169	5.63991	4.74159	2.99595	2.15609	5.8868	2.3315	4.62307	2.83953	5.35766	3.99251	3.66307	1.95872	0.762927	2.04531	3.39823	2.58066	5.64297	2.54096	2.34795	2.867	3.38533	3.21597	4.18714
IRF5	2.79323	0.821065	2.17249	0.379255	0.068492	1.11051	3.93492	-0.802298	2.86055	2.57412	2.24381	2.06313	-0.379691	1.60815	1.02896	0.600555	-1.18725	5.26765	-1.48121	1.09395	1.16396	1.69109	-0.211546	1.14164	0.526239	0.615887
CDCP1	3.08023	3.98661	3.4702	3.96815	2.95421	3.32622	0.910326	4.40729	1.59116	3.85535	2.08655	3.85794	3.30828	2.14824	0.445218	0.0380006	3.27252	0.0666059	4.35247	3.94609	3.01379	1.77743	3.95545	2.83012	3.33935	3.13626
RFTN1	4.6618	1.71685	3.29801	1.73769	1.29869	-0.531696	4.30575	0.947584	3.25373	4.56175	3.22421	2.13807	1.20633	2.28436	1.69794	0.21497	1.9369	4.96396	-0.313816	1.33331	2.92633	2.99697	1.39909	1.17329	-0.46168	0.724109
PXDN	1.67162	3.80872	2.58912	3.03565	1.54585	0.91834	4.95596	2.02332	3.68996	5.87888	4.64008	3.67025	0.407222	4.16907	2.28779	1.16401	2.12109	0.937924	-0.166694	2.05168	2.05614	3.10545	0.740824	1.71426	1.45192	1.68385
ARHGEF17	0.206005	0.84054	0.111566	0.922868	0.0863082	-0.264292	2.43351	1.43695	3.68179	2.85666	3.12196	1.79824	-0.169513	3.03522	0.696857	-0.577222	2.5873	0.52294	-1.21572	0.654481	0.508956	0.431644	0.280648	-0.0717199	-1.63132	-1.57448
PTAFR	0.477004	1.50534	1.53315	0.636469	-0.951613	-1.30055	2.45648	0.482776	3.66746	4.09881	1.52265	-0.827223	-0.525299	1.7991	0.442577	-0.914298	-1.3572	1.55568	-0.12845	1.31621	-0.41133	0.768053	-0.866618	-1.63699	-0.983116	1.49596
DUSP10	2.09448	1.50561	1.89932	2.91583	1.99953	2.38619	1.61786	2.83191	1.1344	1.68863	1.09982	1.38264	2.96011	0.573307	-1.78285	-1.8374	1.44828	0.731331	-2.28979	2.38593	0.788853	2.05658	-1.79569	2.25969	1.72791	2.97143
AUTS2	1.84781	3.12199	2.85602	0.438059	-0.897767	1.017	2.98127	1.38939	4.41372	3.04085	2.31526	1.48752	1.41793	3.43057	-1.11357	-2.03547	2.75747	1.06948	2.76496	0.470834	1.85517	0.875009	2.72032	1.28185	2.83775	1.27983
LY9	2.24571	0.131194	1.98428	0.803037	0.289327	-0.0746796	2.78536	0.304803	2.59199	3.12155	1.55336	1.42213	-1.62663	1.12664	-0.211025	0.122898	-0.615349	4.10746	-1.82633	1.37134	0.759786	2.33318	-0.498819	0.207056	-1.66759	0.802011
ATP8B2	1.41244	1.14732	2.17687	0.996635	-0.0175704	0.330513	3.9158	-0.163163	2.86641	2.95627	3.56487	2.08864	-0.331385	2.94706	4.96031	3.97477	1.44707	3.15103	-0.742313	1.29584	0.991122	2.42908	0.252852	0.928056	-0.50959	0.699205
DUSP5	2.45771	3.49826	4.23456	4.93838	3.11532	1.96802	4.3604	3.70013	2.37278	3.60059	2.64716	2.26606	2.70718	1.52953	-0.850488	-1.99262	1.89506	2.16433	4.58069	3.27624	3.36494	3.32907	2.45472	2.81109	2.1204	2.50797
LPAR2	0.695379	1.00277	1.81533	1.04404	0.717316	1.39579	-1.96366	1.19688	-1.27505	0.153014	-2.89079	1.93042	1.42141	-0.94581	-0.383384	-1.88625	-0.256716	-1.29124	-0.160866	1.77735	1.16546	0.75611	0.383231	-0.34361	0.558091	1.97652
TMTC2	-0.194207	-0.936483	0.372172	0.590396	-0.209698	-1.41548	-0.14858	0.15387	1.63224	1.36052	1.15832	-0.363742	-2.80404	2.35341	0.52307	-1.43982	1.13914	0.0197446	-1.71043	1.69949	0.0450795	0.703411	-0.952473	-1.27072	-2.64799	-2.83793
FAM46C	1.96404	3.36513	3.07602	2.55355	2.89221	3.40528	1.9885	2.58509	0.96632	2.97282	1.895	4.00229	2.43323	0.134668	-1.78924	-1.51509	0.57091	2.7605	0.674994	3.19434	0.676159	4.35373	1.38136	1.83064	1.10987	2.38287
PDZD3	2.95567	1.58452	3.00326	0.308804	0.666893	3.02786	3.79166	-0.64562	0.926068	4.36993	3.67151	0.66288	2.88419	2.57556	-0.147421	0.207843	3.07789	3.09466	4.67954	1.60666	3.60799	3.23697	3.89449	1.42963	1.64916	3.76499
ACSL5	4.63484	5.60403	5.54904	4.84955	3.13618	4.36057	4.21415	3.39063	3.47708	4.81012	5.3488	5.71164	5.13059	4.90758	0.608724	0.560989	5.11728	4.49312	4.71053	4.0062	5.79172	4.15096	5.7206	6.2073	6.05591	4.96657
ANGPT1	-2.64798	-0.780245	-1.26698	-1.13089	-2.47323	-1.93199	0.475438	-2.12506	0.93386	0.631682	0.515339	-0.670362	-3.6497	1.10105	-1.8805	-2.79876	1.39107	-1.27645	-2.3562	-1.59323	0.341405	0.128148	-1.82052	-1.23311	-2.60907	-1.95498
PDE2A	1.80937	3.08335	3.89398	2.19769	0.596496	1.89943	3.91856	-1.15383	3.73834	2.49254	2.03269	1.16955	4.01039	3.13786	0.0816805	-0.826461	3.93551	0.776121	3.87956	2.25048	3.79277	2.65104	3.86279	1.97725	1.15229	1.27655
SH2D2A	0.862392	-0.51026	0.149324	-1.87474	-2.03439	-1.25429	2.65396	-0.554864	0.20974	-0.044778	0.120657	-2.08607	-3.91998	-1.022	-2.35227	-0.321888	-0.50063	2.95207	-0.34614	0.260218	0.803086	0.65328	-0.313328	-1.13195	-1.73609	0.747078
STARD10	6.04894	6.76361	6.64793	6.66822	6.70321	6.02068	4.42605	6.61742	4.93319	5.96133	5.77112	5.89793	7.71174	4.76334	2.16211	2.13941	6.94019	5.37744	7.34713	6.95809	7.68406	6.57457	7.56626	6.96705	7.34672	6.61137
ADRB2	-0.632421	-0.572342	-0.0332137	1.68741	0.0645932	-0.691539	0.0198727	0.649128	-0.713701	-0.458973	-0.646993	-1.27648	-0.782524	-0.383411	-1.50045	-1.86664	-2.63065	0.546877	-4.77622	1.22584	-1.35345	-0.100039	-4.40606	0.489255	-2.38169	1.10593
LIMCH1	-0.43528	-0.957622	1.26174	0.0670329	-0.945971	-0.131858	3.5141	-0.0198752	1.65582	1.43004	1.97949	0.20548	-0.349496	2.99166	3.27862	1.74636	1.6692	0.578997	-1.25345	-0.303205	-0.115074	-0.00479337	-0.561384	0.564203	-2.51303	-0.107668
TENM3	-2.6492	-1.61998	-1.27437	-2.78155	-2.72102	-3.16168	-0.0771141	-2.65468	-1.0968	1.24677	0.866291	-0.906075	-3.75522	-1.24486	-4.30935	-4.09931	-2.45818	-0.874069	-4.32372	-2.33735	-2.01645	-0.863428	-2.54116	-2.26983	-4.38229	-3.76512
WWC2	-0.0267252	0.320854	0.765925	1.40543	1.1162	1.23095	3.31765	1.75493	3.08065	3.43272	2.87271	2.32627	-1.8699	2.54241	0.711336	-0.320547	1.81395	0.872592	0.88991	1.28682	0.329135	1.30459	1.01978	0.947142	-2.98845	0.258109
PDE1A	-0.684158	0.252198	-0.478362	0.300557	-1.60584	-0.340468	1.46923	-2.01267	1.65058	0.711847	0.971545	-0.555893	-2.07397	2.36942	-2.85902	-2.29588	1.94565	0.642498	-0.111704	-0.0740826	0.248122	0.138867	-1.08221	0.0146124	-1.49924	-1.54841
BIRC3	4.20663	2.47052	4.65609	2.65831	1.64769	1.31896	3.87376	2.7579	3.79548	5.24899	3.40358	2.01628	1.54468	2.8166	0.449725	0.670632	0.527411	6.23125	1.57907	2.735	2.22525	3.67282	0.745384	2.408	0.959763	2.41503
RRAGD	1.59933	1.67416	1.96401	1.46329	1.38766	0.481774	2.26114	2.26978	4.28411	3.08389	3.52375	3.62609	0.949886	3.63493	1.48624	1.04171	3.27954	2.60634	-1.32834	1.82624	0.915207	0.938376	0.554756	1.6981	2.28684	-0.278188
XG	3.24989	1.97818	3.77551	2.915	3.1397	1.97832	5.2412	2.44303	3.84026	4.3723	4.36057	4.0692	2.30605	3.54798	7.72388	7.06344	2.32587	3.68657	1.37612	3.0227	3.93945	3.80476	2.64287	2.57726	1.10696	2.1187
MSN	4.55603	4.22874	5.15703	3.87643	2.82185	2.75247	6.61653	2.74508	6.8585	6.85282	6.26918	4.9443	2.21133	6.09887	6.05125	4.59127	4.70783	5.95958	2.27565	3.76163	5.14418	5.18687	2.96681	3.48291	2.16696	3.24184
CCDC88A	2.13426	1.20187	2.11629	0.977961	0.259676	0.183937	3.73379	0.511205	3.24667	3.59378	3.30946	2.61283	0.266505	2.48403	3.43126	2.1606	1.98818	3.00892	-2.10085	0.806844	1.41297	2.53684	-0.055164	0.733311	-0.534115	-0.431649
PDGFRB	2.05907	3.11062	3.0629	2.79579	1.23703	0.107139	4.81385	1.64111	2.40296	5.13172	4.00704	4.15453	0.114154	3.18112	0.9668	-0.387247	1.98068	3.22895	0.244863	1.51717	2.75006	3.78937	1.40262	1.74432	0.470625	0.296874
DYNLRB2	2.14853	0.722081	2.40358	3.39553	2.66179	3.90973	4.16512	3.52322	2.84659	2.77767	3.90184	4.03545	3.02787	3.23595	5.06575	6.4225	1.64028	2.7691	0.0390822	3.90442	3.07019	2.84125	-1.25006	3.38475	3.52971	3.48345
CORO6	0.160662	-0.605514	-0.237777	1.34632	1.61796	-0.829131	-0.525671	0.372139	1.76009	-0.0559482	0.324649	-0.240914	0.12201	1.17695	0.7824	1.29064	1.75207	-0.33618	-2.5967	1.79302	-3.15009	-2.87332	-1.34364	-0.123557	-1.51443	-0.574498
ADRB1	-0.0538111	0.116671	-0.832568	1.16779	-0.314295	-1.60775	2.08449	2.99014	1.75182	2.39519	-0.702827	0.608913	-0.322289	-0.625017	-1.88281	-1.03144	0.699427	1.00131	0.393669	0.109735	-1.11237	-2.22463	-1.09098	-2.0617	-2.83847	-1.4356
DENND1C	3.19117	0.754742	2.5995	0.510334	0.173255	0.540722	4.13959	0.144934	2.60829	2.90635	2.3979	1.06567	-1.78502	1.45618	1.5404	0.937066	-0.251449	4.98743	-0.299939	1.71405	1.52459	2.36213	0.374767	0.642267	-0.528927	1.27095
MYL6B	1.55226	1.18063	1.36538	1.21649	1.59478	1.36522	0.792572	1.79714	2.14161	-0.449101	2.78548	1.56009	3.75881	2.73377	5.25807	6.54263	2.65784	1.22997	-0.0302126	0.469105	2.00315	2.35278	1.73355	2.88104	3.1604	3.68918
CD164L2	-0.930501	-0.10541	-1.64647	-3.68076	1.08378	-2.48894	-0.844564	0.532656	-1.84877	-1.25755	-2.38615	-0.839361	0.186665	-1.34527	1.80984	2.21988	-3.84779	-2.77688	-2.54569	0.137674	-1.35544	0.124805	-1.98992	-0.24183	-0.366822	-0.611275
SOX4	4.69636	5.04652	3.11021	4.31196	3.68133	3.27117	3.16944	4.58901	0.962505	3.86645	3.1365	4.03412	5.57182	3.92636	2.59337	-0.0398249	1.9677	1.81837	1.60615	3.78096	0.427435	1.57654	1.70633	3.99404	4.18631	4.03295
TRIB2	2.82207	0.79771	1.04343	2.51025	2.69714	3.03038	2.63675	3.76156	2.24431	2.84115	3.22272	3.52708	-0.526965	2.38916	4.91564	4.352	1.8259	3.22588	-0.235737	2.89825	0.896861	1.67645	0.445377	0.998239	-0.239134	-1.0993
EMP2	6.75363	7.09833	5.44603	6.7061	7.44491	5.8193	4.66672	8.28822	4.33029	5.434	4.49722	7.10935	7.28024	3.82584	3.8964	2.69629	4.83403	2.99865	4.38384	7.24213	5.27144	4.55982	5.05585	6.08909	5.35935	6.18366
NOD2	0.0378039	0.853469	1.47659	1.57539	-0.10635	0.804871	1.62981	1.78393	1.27104	2.63426	-0.0555328	-0.46348	-0.37653	1.47904	0.164606	-0.329343	-1.63122	0.995427	-3.48583	2.07016	-2.12509	-0.489757	-3.13742	-0.941972	-0.665237	0.919241
UGGT2	1.03192	1.77126	0.538588	1.34491	-0.267833	-0.240861	2.38193	-1.54348	1.63958	1.66124	1.35236	0.989648	-2.974	1.55223	3.24784	2.63714	0.543407	1.67818	-1.09138	0.313257	0.148088	0.641315	-1.93406	-0.512701	1.54422	-1.95952
WDR78	-0.277751	-1.12585	-0.480929	-1.77214	-1.91728	-2.16858	0.133274	-0.762255	0.208205	-1.36463	0.698183	-1.72131	-0.754665	-0.279222	2.2721	2.75695	0.793655	-0.321214	1.05696	-0.633231	0.0762854	0.256262	1.37542	-1.05222	-4.1778	-2.81042
C20orf96	-3.85069	-2.62699	-3.20458	-5.26975	-4.17675	-3.96145	-1.59061	-3.44375	-2.67479	-2.28674	-1.53514	-2.04125	-1.58982	-1.33218	0.909796	0.203953	-1.93537	-2.5982	-2.88063	-4.72427	-4.80739	-4.83111	-2.44197	-2.0841	-2.35037	-3.22515
PDE6H	0.0965182	-0.808218	2.09158	0.0227726	-2.70636	-1.79228	1.36193	-3.20059	1.24124	0.465692	0.565461	-0.214095	-0.646629	-0.626801	-3.36358	-1.81235	0.396905	-0.0827974	-0.67422	-2.25148	1.16854	0.92489	1.12871	0.637573	-1.82232	-0.449497
RHOBTB3	2.90992	4.62607	2.29923	3.50588	4.57172	4.52261	3.83716	4.87748	2.70171	2.62819	2.85441	4.98528	4.79067	3.1969	0.221902	0.456144	2.21612	1.19404	0.343919	4.45694	1.17646	1.57768	0.691606	3.4512	3.74729	1.68553
RPS6KA5	-0.160758	-0.690204	-0.0534129	-1.40412	-0.225374	-0.312074	2.10019	-2.23242	2.27818	1.40488	1.51906	-0.720793	-0.1287	1.90582	2.37564	1.54974	2.38074	1.82258	2.71567	-0.460578	2.4158	1.2257	2.20573	-0.23975	-0.85778	-0.0618618
NXN	3.47619	2.69512	2.55741	3.25534	3.46006	2.24261	3.67873	3.94068	5.63234	4.74262	4.25151	4.67642	2.99736	4.72195	2.38115	0.0590229	4.54976	2.48884	1.23992	3.33521	3.55169	2.55928	2.21044	2.35502	0.127263	0.574538
[truncated: 8,902 more rows]

## Sheet: TableS1B FPKM ssGSEA&heatmaps-1
Table S1B. FPKM values of 12,996 genes in 26 samples from cufflinks results (FPKM>1 across the samples), Related to Figure 2 and Figure 4
[truncated: 12,997 more rows]

## Sheet: TableS1C NMF meta gene
Table S1C. NMF cluster results, Related to Figure 1B
[truncated: 102 more rows]

[truncated: 31 more sheets: TableS2A GSEA , TableS2B Signature genes, TableS2C gene mutations, TableS2D FPKM, TableS3 Fibroblast activation, TableS4A Phylum, TableS7A Phylum (2), TableS4B Family, TableS7B Family (2), TableS4C Species, TableS4D Diversity&Enrichment, TableS4E H.bilis strains , TableS6F H.bilis genes, TableS7C Species (2), TableS7C TCGA Human WGS-old, Old TCGA Human WGS, TableS5A Mutations in TP53, TableS5B TCGA Human TP53 in CRC, TableS5D FPKM of TP53 isoforms, TableS6A ssGSEA …]
